# Supplementary material for: Tunable C–H functionalization and dearomatization enabled by an organic photocatalyst
Source: Royal Society of Chemistry journal article supplement (doi:10.1039/d4sc00120f), 2024-01-01

*Electronic Supplementary Information for*

## **Tunable C-H Functionalization and Dearomatization Enabled by an Organic Photocatalyst**

Bohang An,<sup>a</sup> Hao Cui,<sup>a</sup> Chao Zheng,<sup>\*b</sup> Ji-Lin Chen,<sup>a</sup> Feng Lan,<sup>a</sup> Shu-Li You,<sup>\*b</sup> and Xiao Zhang<sup>\*a</sup>

<sup>a</sup>Fujian Key Laboratory of Polymer Materials, Fujian Provincial Key Laboratory of Advanced Materials Oriented Chemical Engineering, College of Chemistry and Materials Science, Fujian Normal University, Fuzhou 350007, China

E-mail: [zhangxiao@fjnu.edu.cn](mailto:zhangxiao@fjnu.edu.cn)

<sup>b</sup>State Key Laboratory of Organometallic Chemistry, Shanghai Institute of Organic Chemistry, Chinese Academy of Sciences, Shanghai 200032, China

E-mail: [zhengchao@sioac.ac.cn](mailto:zhengchao@sioac.ac.cn); [slyou@sioac.ac.cn](mailto:slyou@sioac.ac.cn)

### **Table of Contents**

|                                                                                                                |      |
|----------------------------------------------------------------------------------------------------------------|------|
| 1. General methods.....                                                                                        | S1   |
| 2. Characterization of ITNs .....                                                                              | S2   |
| 3. DFT calculations .....                                                                                      | S12  |
| 4. General procedure for photocatalytic C-H functionalization.....                                             | S25  |
| 5. General procedure for photocatalytic intramolecular dearomatization of indole derivatives with ketones..... | S42  |
| 6. X-Ray crystal data of ITN-1, ITN-2, ITN-3, 2a and 3k .....                                                  | S50  |
| 7. References .....                                                                                            | S99  |
| 8. Copies of NMR spectra .....                                                                                 | S101 |

## 1. General methods

Unless stated otherwise, all reactions were carried out in flame-dried glassware under a dry nitrogen atmosphere. All solvents were purified and dried according to standard methods prior to use.

$^1\text{H}$  and  $^{13}\text{C}$  NMR spectra were recorded on a Bruker instrument (400 MHz and 100 MHz, respectively) and internally referenced to tetramethylsilane signal or residual protio solvent signals.  $^{19}\text{F}$  NMR spectra were recorded on an Bruker instrument (375 MHz). Data for  $^1\text{H}$  NMR are recorded as follows: chemical shift ( $\delta$ , ppm), multiplicity (s = singlet, d = doublet, t = triplet, m = multiplet or unresolved, coupling constant(s) in Hz, integration). Data for  $^{13}\text{C}$  NMR are reported in terms of chemical shift ( $\delta$ , ppm). HRMS were obtained on FTICRMS Bruker 15T LC-MS (ESI) mass spectrometer with the use of quadrupole analyzer. Fourier Transform Infrared spectra were recorded on a Nicolet IS50 FT-IR spectrophotometer.

Substrates  $^t\text{Bu}_4\text{NPF}_6$  were purchased from Energy-chemical, solvents were purchased from Aladdin, and used without further purification. Substrates **1a-1u** were synthesized according to the literature procedures<sup>[1-3]</sup>.

## 2. Characterization of ITNs

The substrates **ITN-1**, **ITN-2** and **ITN-3** were known compounds. The synthesis of **ITN-1**, **ITN-2** and **ITN-3** were accomplished following the reported procedures<sup>[4-6]</sup>.

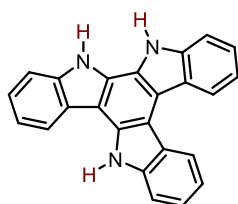

**ITN-1**<sup>[4]</sup>, gray solid. <sup>1</sup>H NMR (400 MHz, DMSO-*d*<sub>6</sub>) δ 11.87 (s, 1H), 11.48 (s, 1H), 11.38 (s, 1H), 8.87-8.78 (m, 3H), 7.82 (d, *J* = 8.0 Hz, 3H), 7.50-7.37 (m, 6H).

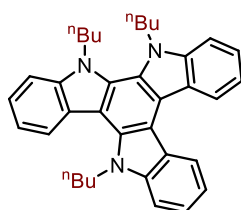

**ITN-2**<sup>[5]</sup>, yellow solid. <sup>1</sup>H NMR (400 MHz, CDCl<sub>3</sub>) δ 8.90-8.82 (m, 2H), 8.35 (d, *J* = 8.4 Hz, 1H), 7.63-7.57 (m, 3H), 7.48-7.29 (m, 6H), 4.90 (t, *J* = 7.6 Hz, 2H), 4.64 (t, *J* = 7.6 Hz, 2H), 4.52 (t, *J* = 7.2 Hz, 2H), 2.05-1.97 (m, 2H), 1.37-1.31 (m, 2H), 1.25-1.15 (m, 4H), 0.86 (t, *J* = 7.2 Hz, 3H), 0.77-0.71 (m, 4H), 0.52-0.47 (m, 6H).

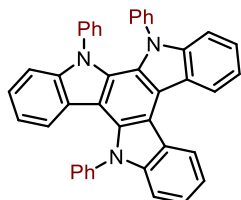

**ITN-3**<sup>[6]</sup>, yellow solid. <sup>1</sup>H NMR (400 MHz, DMSO-*d*<sub>6</sub>) δ 9.06-9.00 (m, 2H), 7.78-7.68 (m, 5H), 7.57-7.48 (m, 4H), 7.45-7.44 (m, 2H), 7.25-7.12 (m, 8H), 6.76-6.66 (m, 5H), 6.08 (d, *J* = 8.4 Hz, 1H).

### 2.1 UV/Vis absorption spectra of ITNs

UV/vis absorption spectra of **ITNs** (0.01 mM in DMSO) were recorded in 1 cm path quartz cuvettes using Pgeneral TU-1901 UV/Vis spectrometer.

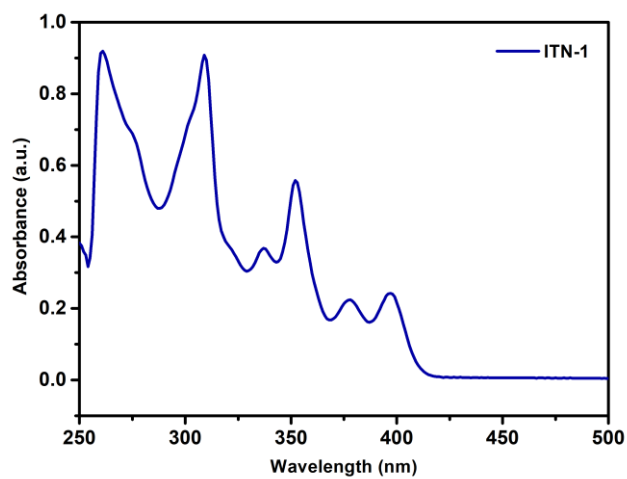

**Figure S1.** UV/vis absorption spectrum of **ITN-1** in DMSO.

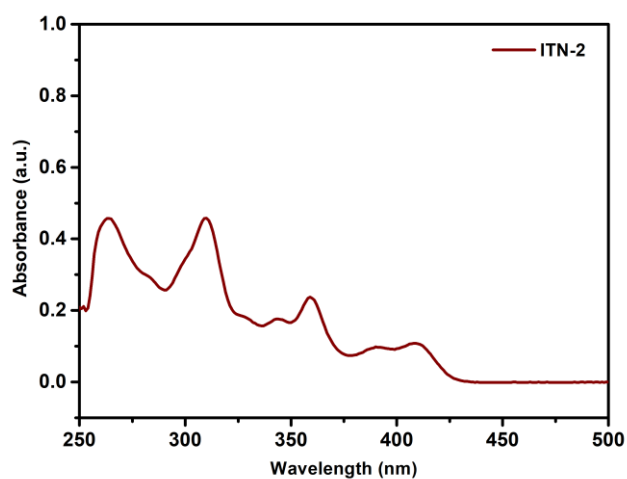

**Figure S2.** UV/vis absorption spectrum of **ITN-2** in DMSO.

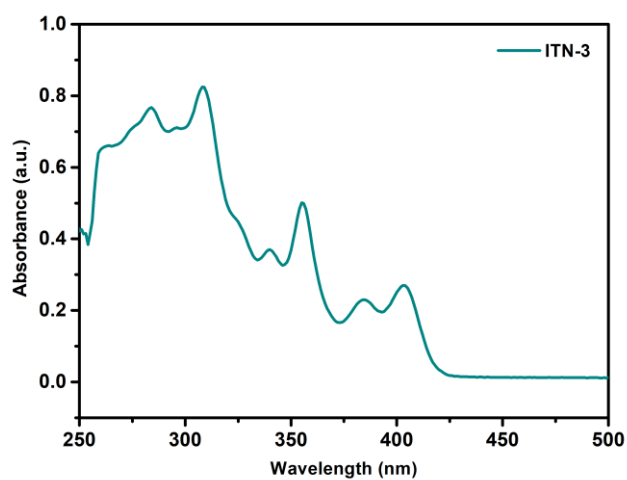

**Figure S3.** UV/vis absorption spectrum of **ITN-3** in DMSO.

## 2.2 Emission spectra of ITNs

Fluorescence spectra were recorded on Edinburgh Instruments FS5 Spectrofluorometer in 1 cm quartz cuvettes. ITNs were prepared as a 0.01 mM solution in DMSO and used freshly for the measurements.

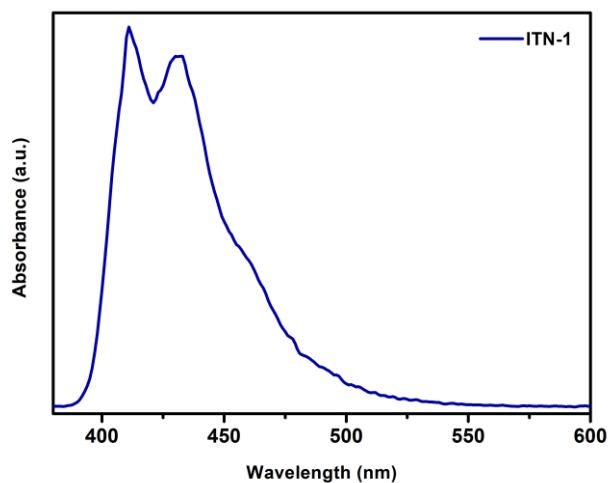

**Figure S4.** Emission spectrum of ITN-1 in DMSO.

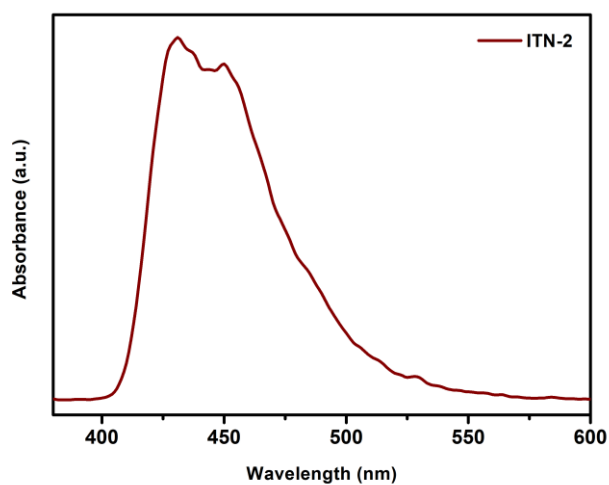

**Figure S5.** Emission spectrum of ITN-2 in DMSO.

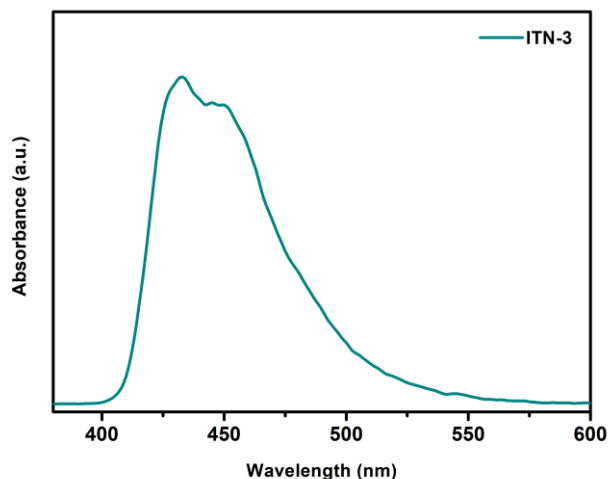

**Figure S6.** Emission spectrum of **ITN-3** in DMSO.

### 2.3 Fluorescence decay curves of ITNs

Estimating lifetimes of excited states of **ITNs** were based on the ultrafast transient absorption spectroscopic techniques. The luminescence decays were measured on an Japan horiba Instruments FluoroMax-4 spectrometer. The sample compartment was home-built and designed as 10×10 mm cuvettes in 90° geometry between excitation and detection. The solution of **ITNs** in DMSO (0.01 mM) were excited at 352 nm, 359 nm and 355 nm, respectively. All decay traces were fitted by iterative reconvolution with an experimental instrument response function recorded directly after decay acquisition.

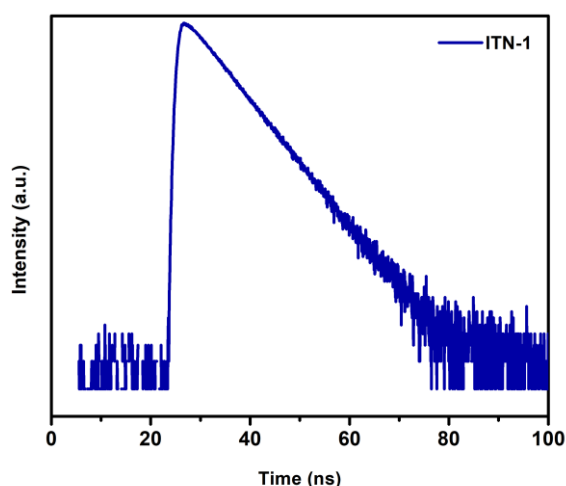

**Figure S7.** Fluorescence decay curve of **ITN-1** in DMSO.

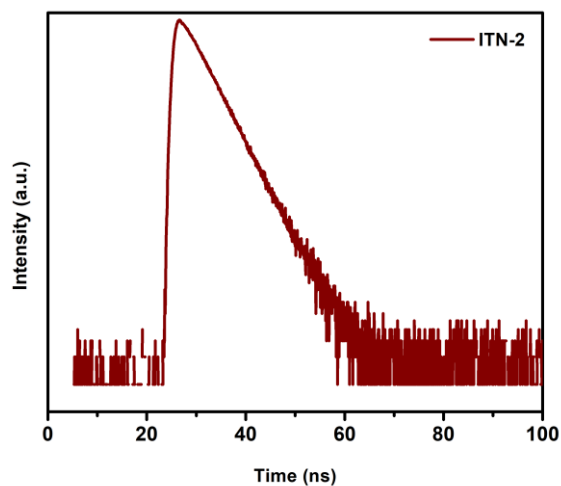

**Figure S8.** Fluorescence decay curve of **ITN-2** in DMSO.

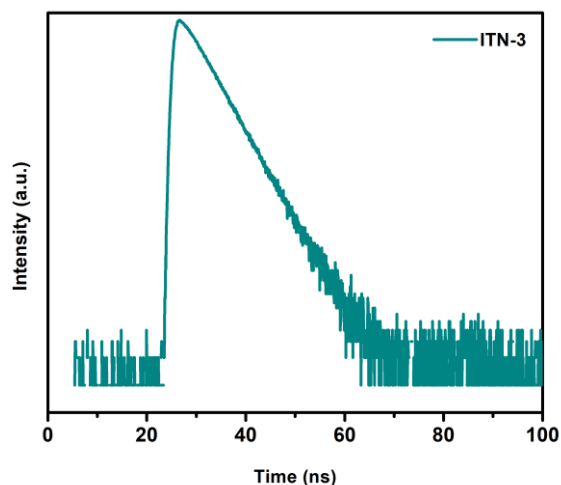

**Figure S9.** Fluorescence decay curve of **ITN-3** in DMSO.

#### **2.4 UV/Vis absorption and emission spectra of ITNs**

The zero-zero vibrational state excitation energy  $E_{0,0}$  was estimated by the corresponding energy of the wavelength at which emission and absorption overlap. This wavelength was determined setting the intensity of emission  $\lambda_{\max}$  to the absorbance of **ITNs** at excitation wavelength.

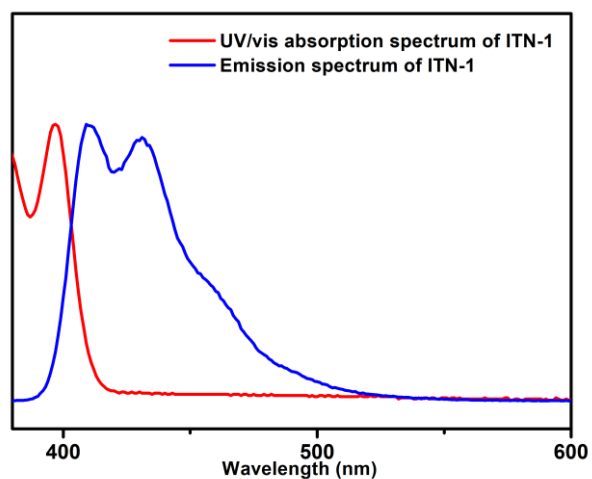

**Figure S10.** UV/Vis absorption and emission spectra of **ITN-1** in DMSO (0.01 mM).

Cross point  $\lambda$ : 403 nm.  $E_{0-0}$ : 3.08 eV.

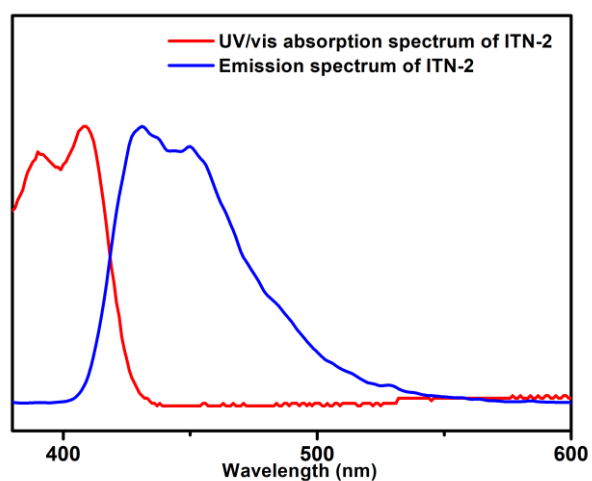

**Figure S11.** UV/Vis absorption and emission spectra of **ITN-2** in DMSO (0.01 mM).

Cross point  $\lambda$ : 419 nm.  $E_{0-0}$ : 2.96 eV.



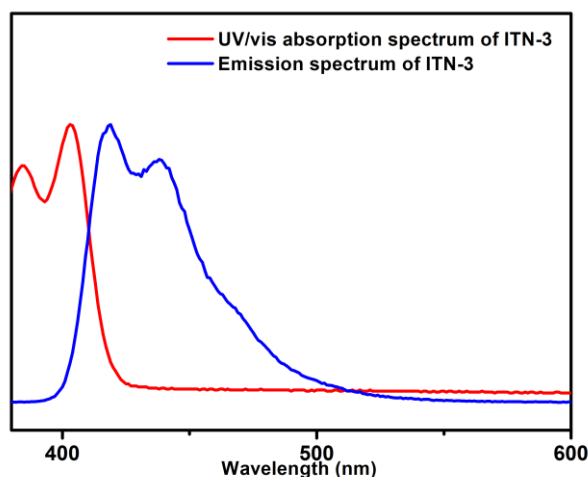

**Figure S12.** UV/Vis absorption and emission spectra of **ITN-3** in DMSO (0.01 mM).

Cross point  $\lambda$ : 410 nm.  $E_{0,0}$ : 3.02 eV.

### 2.5 Cyclic voltammograms of ITNs

Voltammetric experiments were conducted with a computer-controlled Shanghai Chen Hua CHI660E containing glassy carbon electrode serving as the working electrode, saturated calomel reference electrode, Pt wire auxiliary electrode.

All solutions used for the voltammetric experiments were deoxygenated by purging with high purity nitrogen gas and measurements were performed in a electrolytic cell at room temperature.

Excited state oxidation and reduction potentials were calculated by the following approximating formulas:  $E_{1/2}(\text{PC}^*/\text{PC}^{\bullet-}) = E_{1/2}(\text{PC}/\text{PC}^{\bullet-}) + E_{0,0}$  and  $E_{1/2}(\text{PC}^{\bullet+}/\text{PC}^*) = E_{1/2}(\text{PC}^{\bullet+}/\text{PC}) - E_{0,0}$ .

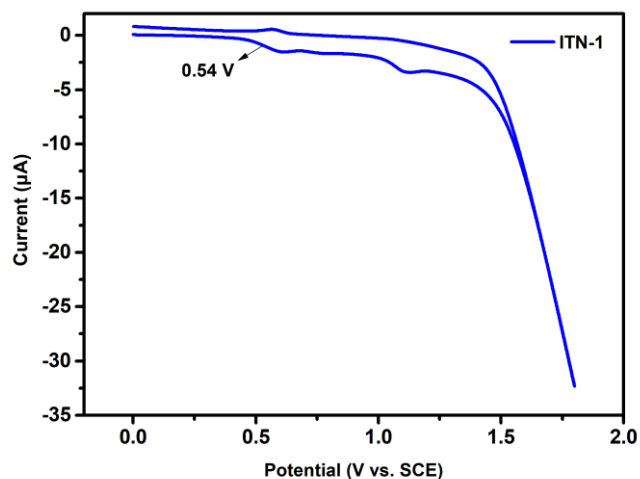

**Figure S13.** Cyclic voltammogram of **ITN-1** in DMSO (1.0 mM) containing 0.1 M  $n\text{Bu}_4\text{NPF}_6$ . Scan rate: 0.1 V/s.  $E_{1/2}(\text{PC}^{\bullet+}/\text{PC}) = +0.54$  V,  $E_{1/2}(\text{PC}^{\bullet+}/\text{PC}^*) = -2.54$  V

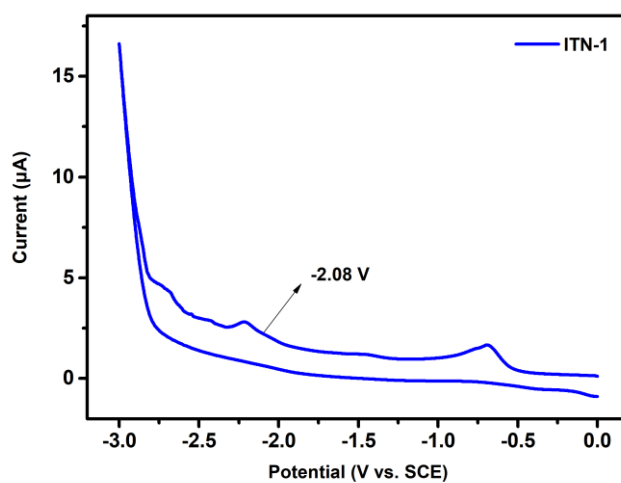

**Figure S14.** Cyclic voltammogram of **ITN-1** in DMSO (1.0 mM) containing 0.1 M  $n\text{Bu}_4\text{NPF}_6$ . Scan rate: 0.1 V/s.  $E_{1/2}(\text{PC}/\text{PC}^{\bullet-}) = -2.08$  V,  $E_{1/2}(\text{PC}^*/\text{PC}^{\bullet-}) = +1.00$  V.

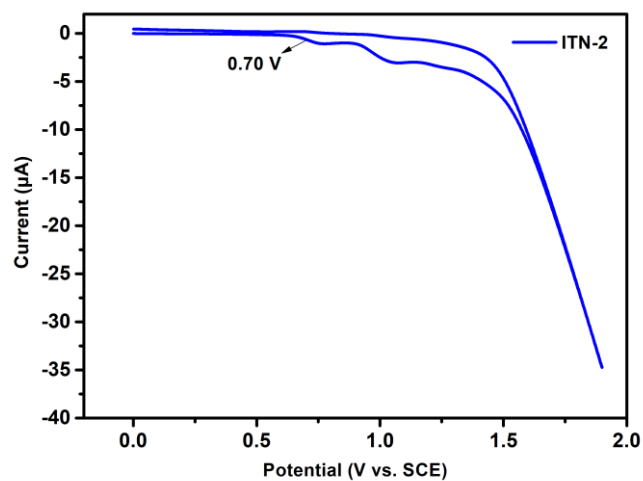

**Figure S15.** Cyclic voltammogram of **ITN-2** in DMSO (1.0 mM) containing 0.1 M  $n\text{Bu}_4\text{NPF}_6$ . Scan rate: 0.1 V/s.  $E_{1/2}(\text{PC}^{\bullet+}/\text{PC}) = +0.70$  V,  $E_{1/2}(\text{PC}^{\bullet+}/\text{PC}^*) = -2.26$  V

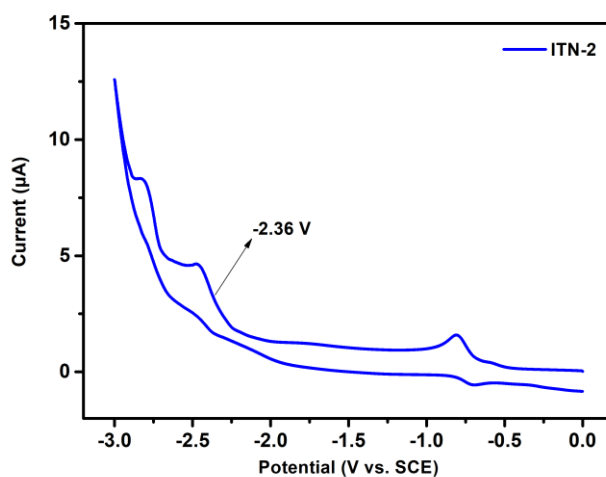

**Figure S16.** Cyclic voltammogram of **ITN-2** in DMSO (1.0 mM) containing 0.1 M  $n\text{Bu}_4\text{NPF}_6$ . Scan rate: 0.1 V/s.  $E_{1/2}(\text{PC}/\text{PC}^{\bullet-}) = -2.36$  V,  $E_{1/2}(\text{PC}^*/\text{PC}^{\bullet-}) = +0.60$  V.

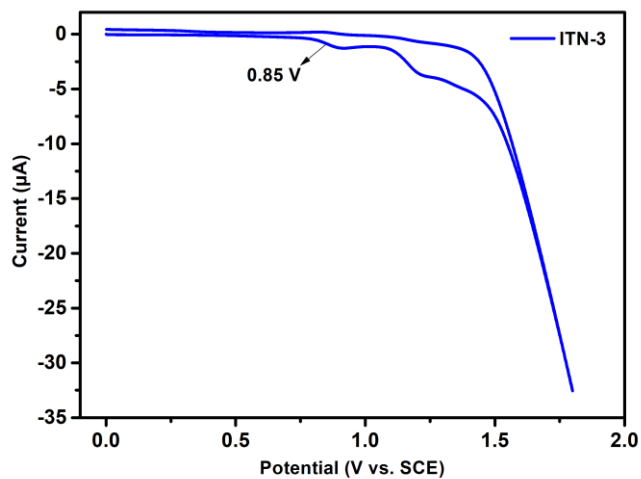

**Figure S17.** Cyclic voltammogram of **ITN-3** in DMSO (1.0 mM) containing 0.1 M  $n\text{Bu}_4\text{NPF}_6$ . Scan rate: 0.1 V/s.  $E_{1/2}(\text{PC}^{\bullet+}/\text{PC}) = +0.85$  V,  $E_{1/2}(\text{PC}^{\bullet+}/\text{PC}^*) = -2.17$  V

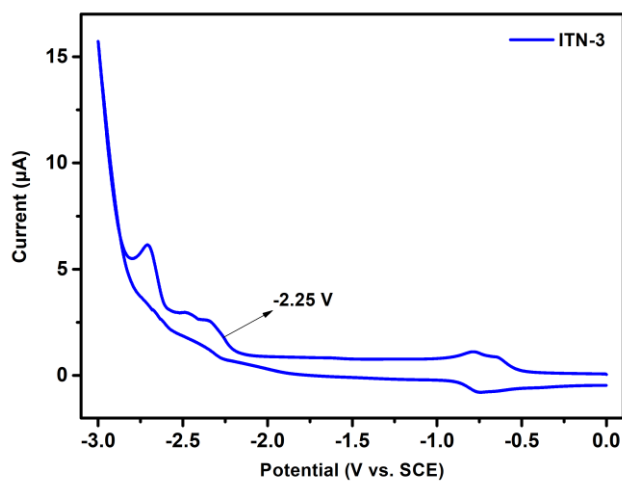

**Figure S18.** Cyclic voltammogram of **ITN-3** in DMSO (1.0 mM) containing 0.1 M  $n\text{Bu}_4\text{NPF}_6$ . Scan rate: 0.1 V/s.  $E_{1/2}(\text{PC}/\text{PC}^{\bullet-}) = -2.25$  V,  $E_{1/2}(\text{PC}^*/\text{PC}^{\bullet-}) = +0.77$  V.

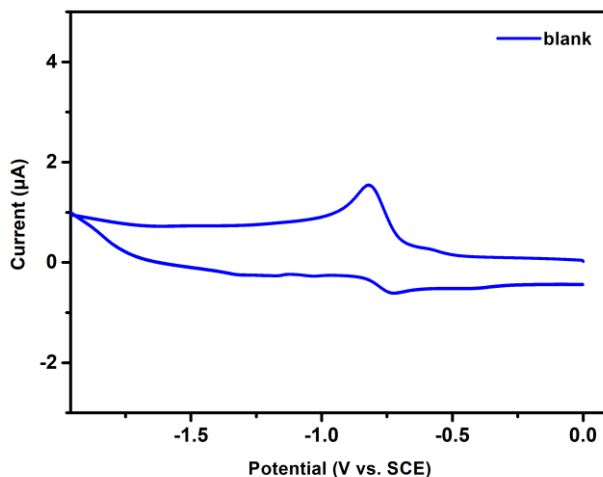

**Figure S19.** Cyclic voltammogram of DMSO containing 0.1 M  $t\text{Bu}_4\text{NPF}_6$ .

Scan rate: 0.1 V/s.

### 3. DFT calculations

#### *Computational Methods*

All the calculation in this study were performed with Gaussian16 package.<sup>[7]</sup> DFT calculations were carried out with the B3LYP functional<sup>[8]</sup> including the D3 version of Grimme’s empirical dispersion correction<sup>[9]</sup> with Becke–Johnson damping.<sup>[10]</sup> For the ground-state structures of **ITN-1**, **ITN-2** and **ITN-3**, the standard 6-31G\*\* basis sets were employed for all atoms. Optimizations were conducted without any constraint in the gas phase. Frequency analyses were performed to confirm each structure being a local minimum (no imaginary frequency). In order to obtain the vertical excitation energies of **ITNs**, time-dependent (TD)-DFT calculations were carried using the B3LYP-D3(BJ) functional with the def2-TZVP basis sets of Weigend and Ahlrichs<sup>[11]</sup> with implicit solvation model (PCM,<sup>[12]</sup> DMSO,  $\epsilon = 46.826$ ) on the basis of the ground-state structures optimized at the same level of theory. The keywords “td(nstates=20)” and “iop(9/40=4)” in Gaussian16 were specified in the calculations. The natural transition orbital (NTO) analyses were performed using Multiwfn 3.8 software.<sup>[13]</sup> By comparing the distributions of the calculated NTOs and MOs, it could be recognized that the  $S_0$ -to- $S_1$  excitation were mainly contributed by one electron transition from the HOMO to LUMO for each **ITN** molecule. The orbital diagrams were prepared using VMD 1.9.3.<sup>[14]</sup>

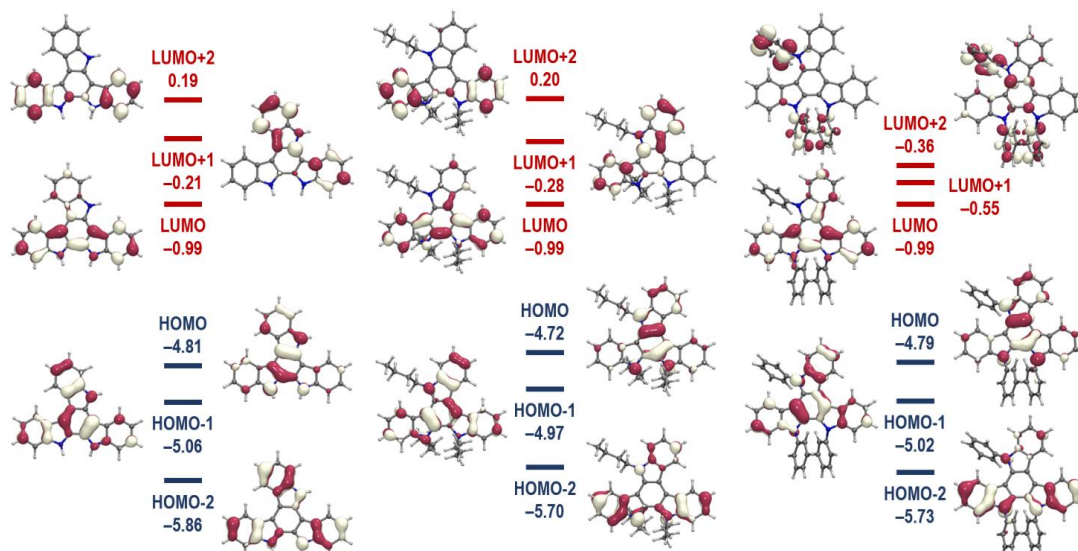

**Figure S20.** Selected molecular orbitals (HOMO-2 to LUMO+2) and the corresponding energies (in eV) of **ITN-1** (left), **INT-2** (middle) and **INT-3** (right). The isovalues of the orbitals are set as  $\pm 0.04$ .

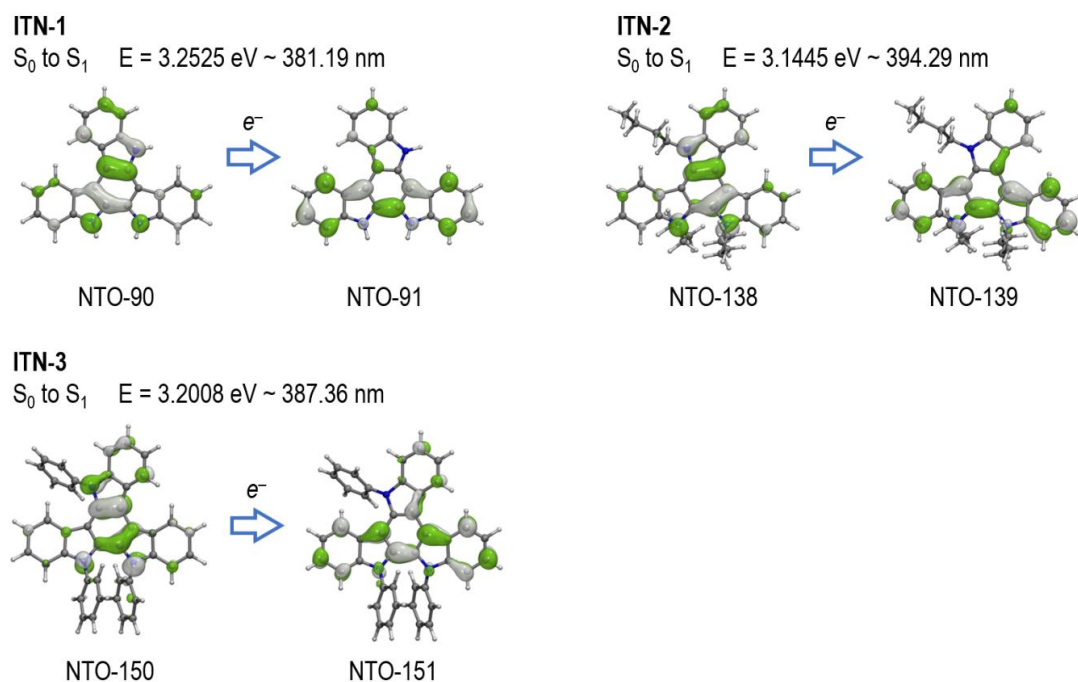

**Figure S21.** Calculated NTOs, vertical excitation energies and wavelengths of maximum absorptions for the  $S_0$ -to- $S_1$  excitation of **ITNs**. The isovalues of the orbitals are set as  $\pm 0.04$ .

*Cartesian Coordinates and Energies for All the Optimized Structures*

**ITN-1**

Opt @ B3LYP-D3(BJ)/6-31G\*\* in gas phase  
SCF Done: E(RB3LYP) = -1087.93290855 a.u.  
Zero-point correction = 0.328419 (Hartree/Particle)  
Sum of electronic and thermal Free Energies = -1087.651011 a.u.

-----  
C,0,1.2309924048,3.2944294194,9.5959620525  
C,0,1.6252743469,2.892034428,8.3134646524  
C,0,0.931617209,3.3418556087,7.1711293324  
C,0,-0.201955864,4.1550374443,7.3722535501  
C,0,-0.6594419477,4.5360114016,8.6597159189  
C,0,0.1070032551,4.132555126,9.7958535132  
C,0,1.134587219,3.6625380917,11.8170699534  
C,0,0.0604915323,4.3882573999,11.2276957227  
C,0,-0.7296416592,5.1863675048,12.0716061474  
C,0,-0.4627593436,5.227706732,13.4359096241  
C,0,0.5926829486,4.4847008611,13.9911784769  
C,0,1.4070425768,3.69573892,13.1859007419  
C,0,2.6803776993,1.9915137451,6.5261280037  
C,0,3.536741752,1.2779156002,5.6871716323  
C,0,3.3147591107,1.3563257554,4.314250937  
C,0,2.2663101645,2.1321684701,3.7919459142  
C,0,1.413574718,2.8403499275,4.6340030677  
C,0,1.604246647,2.7746369901,6.0217351118  
C,0,-2.0855115891,5.3515919134,7.0330955807  
C,0,-3.1779389638,5.997650828,6.4521783511  
C,0,-4.1144995525,6.5799393333,7.3000072382  
C,0,-3.9631585533,6.504263138,8.69449789  
C,0,-2.8679837215,5.8631088664,9.2650384105  
C,0,-1.887494392,5.2840662855,8.4425564652  
N,0,1.805648647,2.9719844976,10.822633823  
N,0,2.6917265941,2.098071195,7.9090799011  
N,0,-1.0506981826,4.678063802,6.4141445636  
H,0,-1.5219150473,5.8013420238,11.6671179485  
H,0,-1.0754973886,5.8504060443,14.0804784022  
H,0,0.7811640409,4.5320980092,15.0595336187  
H,0,2.2329502235,3.1281520499,13.6053452014  
H,0,4.3513014217,0.6827574745,6.0898517675

H, 0, 3.9660031992, 0.8111121836, 3.6378923298  
H, 0, 2.1208052488, 2.1799623996, 2.7172380531  
H, 0, 0.6134653635, 3.4376809819, 4.2060350606  
H, 0, -3.2956157915, 6.035178054, 5.3728258678  
H, 0, -4.9761913335, 7.088260276, 6.8778197633  
H, 0, -4.7165325467, 6.9467719208, 9.3391231273  
H, 0, -2.8031919106, 5.7858389788, 10.3420467527  
H, 0, 2.7464575232, 2.6300061996, 10.935329644  
H, 0, 3.2389463733, 1.508851898, 8.5142521512  
H, 0, -0.9951424316, 4.4896982208, 5.4279037358

-----  
**ITN-1**

Opt @ B3LYP-D3(BJ)/def2-TZVP in DMSO (PCM)  
SCF Done: E(RB3LYP) = -1088.41934541 a.u.  
Zero-point correction = 0.327524 (Hartree/Particle)  
Sum of electronic and thermal Free Energies = -1088.138910 a.u.  
TD-DFT calculations  
Sp @ B3LYP-D3(BJ)/def2-TZVP in DMSO (PCM)  
Excited State 1: Singlet-A 3.2525 eV 381.19 nm f = 0.1887  
<S\*\*2> = 0.000

-----  
C, 0, -0.1674231528, -1.6254156858, -0.0390159678  
C, 0, 1.1992390991, -1.330615644, -0.0341641292  
C, 0, 1.6432026845, 0.00567613, 0.0052922596  
C, 0, 0.6745827906, 1.0222108676, 0.0187580722  
C, 0, -0.7163977298, 0.7584129718, 0.0018420712  
C, 0, -1.1456867484, -0.6017802096, -0.0072506744  
C, 0, -2.1479227471, -2.6836339254, -0.0207406747  
C, 0, -2.4241282988, -1.2865870549, 0.0159290671  
C, 0, -3.7663108292, -0.8919351854, 0.0853517737  
C, 0, -4.7693863689, -1.8480646254, 0.099967683  
C, 0, -4.4660486429, -3.2159352499, 0.0486844112  
C, 0, -3.1515493416, -3.6488614342, -0.0092194333  
C, 0, 3.4511237792, -1.4065210872, -0.0240974128  
C, 0, 4.7803225836, -1.8162012708, -0.0268095763  
C, 0, 5.7590036712, -0.8326547463, 0.0102094971  
C, 0, 5.4212744989, 0.5272586208, 0.0496544989



C,0,4.0945840147,0.9330071219,0.0521672245  
C,0,3.0853516727,-0.0333876775,0.0138099544  
C,0,-0.3316552164,3.0343343823,0.0174045402  
C,0,-0.5862578529,4.4017514934,0.0126307197  
C,0,-1.9092064126,4.8154126442,-0.0287910964  
C,0,-2.9492642913,3.8780931121,-0.0710744937  
C,0,-2.6881114183,2.5155685969,-0.0635466648  
C,0,-1.3665489322,2.0557767517,-0.0104758964  
N,0,-0.7875860988,-2.8606932174,-0.0571252957  
N,0,2.2988413523,-2.165666621,-0.0530925733  
N,0,0.8798307286,2.3849868337,0.0400194715  
H,0,-4.0369002949,0.1484959699,0.1438182652  
H,0,-5.8031433888,-1.5329866751,0.1545140196  
H,0,-5.2673145903,-3.9433169636,0.0599441285  
H,0,-2.9076211608,-4.7027555654,-0.0403679991  
H,0,5.0410187448,-2.8661465336,-0.0558390909  
H,0,6.8016970185,-1.1222501541,0.0092013704  
H,0,6.2074179324,1.2700447418,0.0794290127  
H,0,3.8597226748,1.9884559132,0.0870399563  
H,0,0.2261620331,5.1167084138,0.0366864932  
H,0,-2.1387308898,5.8729964783,-0.0340872031  
H,0,-3.9748719008,4.2210915686,-0.1125339193  
H,0,-3.515303075,1.8280906574,-0.1148446274  
H,0,-0.3279773563,-3.7538058244,-0.0636682204  
H,0,2.2788443667,-3.1698252756,-0.0793531198  
H,0,1.7740010933,2.8405373572,0.0211995784

-----  
**ITN-2**

Opt @ B3LYP-D3(BJ)/6-31G\*\* in gas phase  
SCF Done: E(RB3LYP) = -1559.69930239 a.u.  
Zero-point correction = 0.670882 (Hartree/Particle)  
Sum of electronic and thermal Free Energies = -1559.097092 a.u.

-----  
C,0,8.6258615886,16.2539020862,5.3773089157  
C,0,8.6133188685,15.4508658482,6.5362783194  
C,0,7.4280968181,14.7397360882,6.8652602063  
C,0,6.2575854031,14.9072068196,6.0652670391

C,0,6.2531305972,15.7654471747,4.9286435817  
C,0,7.4369899084,16.5082006239,4.6749449657  
C,0,10.7079924613,16.3673781513,6.2131838436  
C,0,12.0541772031,16.6608318133,6.4394900276  
C,0,12.6312725583,16.2257119797,7.6296368193  
C,0,11.872734189,15.5221474585,8.5770036477  
C,0,10.5384084102,15.2085376841,8.3344998808  
C,0,9.9406165306,15.5917062029,7.1233803473  
C,0,7.1012209387,13.7660673789,7.8875761819  
C,0,7.8146578895,13.0964799602,8.8949658568  
C,0,7.1573061775,12.2002152893,9.7314920766  
C,0,5.7849146451,11.9487458406,9.5799534735  
C,0,5.0576926062,12.5616565027,8.5643938226  
C,0,5.7305307707,13.4453982893,7.7131115963  
C,0,5.9414005946,17.2142512183,3.1498988529  
C,0,5.3178331632,17.8552615768,2.0768495134  
C,0,4.0584214364,17.4154302495,1.6824180543  
C,0,3.4443581119,16.3421411153,2.3414925477  
C,0,4.0623217887,15.7169056535,3.4207251035  
C,0,5.3150372599,16.16319453,3.8766368203  
C,0,10.4938740709,16.7491580714,3.7748390886  
C,0,11.0039321453,15.3705354903,3.3292912804  
C,0,11.5588987578,15.3932029857,1.8996723167  
C,0,12.0744998038,14.0266975768,1.4381442899  
C,0,7.7991912796,18.798514189,3.6832667434  
C,0,7.443129351,19.6157593792,4.9354842264  
C,0,5.9537848453,19.9234039444,5.1299145528  
C,0,5.6955673454,20.8052143895,6.3559050495  
C,0,3.7978379911,14.1941128374,6.3559390509  
C,0,3.2574131899,12.9850978458,5.5765949329  
C,0,1.7392423659,13.0513352236,5.3685767851  
C,0,1.1860465446,11.8438389979,4.6059891755  
N,0,9.9156303257,16.7724551209,5.132676118  
N,0,7.2293311073,17.4376125416,3.6435175587  
N,0,5.2302246834,14.1327417804,6.6170862527  
H,0,12.6299079843,17.2367611782,5.721872489  
H,0,13.6729464924,16.4546417269,7.8341538446

H,0,12.3287402019,15.2241479644,9.5162066835  
H,0,9.9654922049,14.7043262042,9.1001337635  
H,0,8.8797072859,13.241246081,9.0083219053  
H,0,7.7158101312,11.6853905935,10.5073234643  
H,0,5.2859758003,11.2537740815,10.2488626825  
H,0,4.0039117923,12.3408567171,8.4331792898  
H,0,5.8114857001,18.6587940894,1.5405716813  
H,0,3.5622703541,17.8926543241,0.8427816755  
H,0,2.4778356309,15.982691177,2.001561778  
H,0,3.5721181209,14.8684632047,3.8730175853  
H,0,9.7257904968,17.0800780183,3.0751183606  
H,0,11.3040018796,17.4865451618,3.7371702324  
H,0,11.7795126691,15.0232469568,4.0217098489  
H,0,10.1781219269,14.6512014629,3.3956041575  
H,0,12.3713104497,16.1303630125,1.8348097071  
H,0,10.7777323622,15.7404479432,1.2096974022  
H,0,12.4645254157,14.0717768876,0.4162717968  
H,0,11.2765598804,13.2763263924,1.4578462117  
H,0,12.8807126246,13.6680706718,2.0875923931  
H,0,7.4538083883,19.3125813991,2.7827102053  
H,0,8.8847990429,18.7359920101,3.6093193255  
H,0,7.8329260474,19.095951812,5.8188997473  
H,0,8.0034811853,20.5590676876,4.8664085443  
H,0,5.5607368137,20.4177905062,4.2313706313  
H,0,6.2128152277,21.7678822445,6.2708120832  
H,0,6.0494044738,20.3207134617,7.272780308  
H,0,4.6277033847,21.0112109664,6.4799944388  
H,0,3.2876510848,14.25934571,7.3249689654  
H,0,3.5812127068,15.1287743106,5.8392999362  
H,0,3.516612608,12.0669728623,6.1168927831  
H,0,3.7697853884,12.9158974261,4.6087920935  
H,0,1.242807489,13.1265785802,6.3456905667  
H,0,1.4818292538,13.9738654101,4.8300392139  
H,0,1.6372534587,11.7631368097,3.6108807743  
H,0,0.1018690235,11.917667748,4.4750844014  
H,0,1.3946303213,10.9097516361,5.1392556511  
H,0,5.3933985616,18.987417081,5.2309908824

-----  
**ITN-2**

Opt @ B3LYP-D3(BJ)/def2-TZVP in DMSO (PCM)

SCF Done: E(RB3LYP) = -1560.39016610 a.u.

Zero-point correction = 0.669184 (Hartree/Particle)

Sum of electronic and thermal Free Energies = -1559.790139 a.u.

TD-DFT calculations

Sp @ B3LYP-D3(BJ)/def2-TZVP in DMSO (PCM)

Excited State 1: Singlet-A 3.1445 eV 394.29 nm f = 0.1809

<S\*\*2> = 0.000  
-----

C,0,-1.5041690997,0.1631316021,-0.1716434432  
C,0,-1.2056490163,-1.1933183648,-0.3990801172  
C,0,0.1486729925,-1.6076763746,-0.3666954896  
C,0,1.1778210927,-0.6414546381,-0.1584463028  
C,0,0.8774493425,0.7342864983,0.0133169  
C,0,-0.4841763494,1.1142382077,-0.0943869958  
C,0,-3.4856753806,-0.8603145019,-0.3885915111  
C,0,-4.8435681018,-1.1525986952,-0.4513278599  
C,0,-5.2202495266,-2.4381035249,-0.8126931528  
C,0,-4.2562511743,-3.4074408805,-1.1104801142  
C,0,-2.9022738088,-3.1198693002,-1.0159777354  
C,0,-2.4887426016,-1.8449777098,-0.6143754488  
C,0,0.7998695139,-2.8954887045,-0.4562984334  
C,0,0.374684247,-4.2250327465,-0.5589415411  
C,0,1.3095778872,-5.2481600107,-0.6147030174  
C,0,2.6811451295,-4.9725604905,-0.5651731782  
C,0,3.1379315424,-3.670027344,-0.4311936696  
C,0,2.1927354381,-2.6480259019,-0.3605624239  
C,0,0.6621072991,3.030560211,0.1194462397  
C,0,1.0176527923,4.370269873,0.2366577354  
C,0,2.3367206286,4.6788803378,0.5304805188  
C,0,3.2767630744,3.6616208777,0.7167863559  
C,0,2.9220057265,2.3280163151,0.579710264  
C,0,1.6090678974,1.9789516386,0.240586941  
C,0,-3.4822446017,1.2249000436,0.9287685278  
C,0,-3.5221575093,0.558771286,2.3019005917

C,0,-4.0856802405,1.4890815271,3.3720156371  
C,0,-4.1289197181,0.8403545439,4.7524840712  
C,0,-1.5685163107,3.2023324205,-0.9684683764  
C,0,-1.4906083731,2.7597337855,-2.4281499645  
C,0,-0.1223504792,2.9434015892,-3.0784122995  
C,0,-0.1159758013,2.5172208082,-4.5434576453  
C,0,3.7406389534,-0.7275211607,-0.2554009778  
C,0,4.4695078961,-0.7478703547,1.0858104189  
C,0,5.8817632839,-0.1783630535,0.987970183  
C,0,6.6094998019,-0.1765368005,2.3286501754  
N,0,-2.891582018,0.3681437707,-0.1113606014  
N,0,-0.6083749955,2.5049479651,-0.0954494093  
N,0,2.4060764124,-1.296289899,-0.1924010044  
H,0,-5.5876069647,-0.3955896508,-0.2438865648  
H,0,-6.271286117,-2.6864735382,-0.881982925  
H,0,-4.569479965,-4.3950306171,-1.4227725549  
H,0,-2.1879260579,-3.8805526724,-1.2806474603  
H,0,-0.671994373,-4.475483746,-0.5708568383  
H,0,0.9721239124,-6.2734526495,-0.6921768737  
H,0,3.3950499465,-5.7844283412,-0.6149515287  
H,0,4.1970078905,-3.4643701746,-0.364953779  
H,0,0.2829361742,5.155288269,0.1261491122  
H,0,2.6322942933,5.7143278063,0.6371223056  
H,0,4.2958187004,3.9127894063,0.980084337  
H,0,3.6720696305,1.5820043803,0.7639148216  
H,0,-2.8925754326,2.133045044,0.999463017  
H,0,-4.4840725306,1.5127732487,0.6077364516  
H,0,-4.1232699385,-0.3524418034,2.2532058827  
H,0,-2.5067531473,0.2549353437,2.5738613453  
H,0,-5.0938104553,1.802892746,3.0828989298  
H,0,-3.4804770526,2.4002364785,3.413956531  
H,0,-4.5351554591,1.5236838938,5.500405559  
H,0,-3.1282732526,0.5449902527,5.0769418669  
H,0,-4.753075061,-0.0563740478,4.7438119798  
H,0,-1.3559807468,4.2653590806,-0.8828905065  
H,0,-2.5801208202,3.0557827253,-0.6032242265  
H,0,-1.7918161242,1.7112424085,-2.4990252847

H,0,-2.241581676,3.3340142163,-2.9799733503  
H,0,0.18266145,3.9909866193,-2.9951940969  
H,0,-0.8304964069,3.1027678272,-5.127083039  
H,0,-0.3900402202,1.464107054,-4.6436952945  
H,0,0.8704863544,2.6495099259,-4.9914517193  
H,0,4.3085125196,-1.3034561591,-0.9886190007  
H,0,3.6672307301,0.277569639,-0.6587099654  
H,0,4.5134005319,-1.7776186785,1.4496925619  
H,0,3.8876778935,-0.190158329,1.8250459426  
H,0,6.4527424703,-0.7608620147,0.2583735956  
H,0,5.839667083,0.8423208105,0.593928536  
H,0,6.0730884386,0.4290856583,3.0628698814  
H,0,7.6180165931,0.2291682302,2.2324788483  
H,0,6.6921750252,-1.1892864159,2.7299963765  
H,0,0.6235543188,2.3624389293,-2.5310297202

-----  
**ITN-3**

Opt @ B3LYP-D3(BJ)/6-31G\*\* in gas phase  
SCF Done: E(RB3LYP) = -1781.07906393 a.u.  
Zero-point correction = 0.571184 (Hartree/Particle)  
Sum of electronic and thermal Free Energies = -1780.571355 a.u.

-----  
C,0,3.1876962918,2.1916124539,19.293854481  
C,0,2.867498393,1.3408377141,18.2037017439  
C,0,1.4941793075,1.1294777112,17.9134822348  
C,0,0.4753891122,1.6176149166,18.7699140384  
C,0,0.8154587917,2.5731387638,19.7670042614  
C,0,2.1760041408,2.8968062705,19.9791334303  
C,0,5.1478980148,1.3387082006,18.5482064843  
C,0,4.1300541852,0.7953743534,17.7233668298  
C,0,4.5008065217,-0.1384046358,16.7405925826  
C,0,5.8385281931,-0.4892548958,16.5931102852  
C,0,6.8259728006,0.0636100486,17.421270508  
C,0,6.4901183496,0.9772814087,18.4149439937  
C,0,0.9826365388,4.252974251,21.3408547493  
C,0,0.0491588596,3.4480592686,20.6385306957  
C,0,-1.3200247622,3.6928969053,20.8353064834

C,0,-1.7257511067,4.681135923,21.7248599392  
C,0,-0.7821276601,5.4545585689,22.417795307  
C,0,0.5812819771,5.2584574245,22.2237882412  
C,0,-0.4642871707,0.2553533989,17.1674922594  
C,0,-1.449179787,-0.4157994029,16.4392590063  
C,0,-2.7496091879,-0.4059053925,16.9351971206  
C,0,-3.0546891501,0.2477953005,18.1387114166  
C,0,-2.0752292594,0.9446572696,18.8383710383  
C,0,-0.7639290461,0.998862167,18.3375963777  
C,0,5.2166308203,2.4168369983,20.7607887553  
C,0,6.3873519932,3.1787112648,20.8216009762  
C,0,7.0581121959,3.3259645877,22.0352551065  
C,0,6.5566708764,2.7308617564,23.1938099772  
C,0,5.3802951141,1.9809910739,23.1325060813  
C,0,4.7141747718,1.8133136809,21.9194340471  
C,0,3.3324611597,4.8887214457,20.9893716739  
C,0,3.801507011,5.4726779844,19.8065343349  
C,0,4.7806111193,6.4633828344,19.8624275719  
C,0,5.2824178965,6.8913225275,21.0932787072  
C,0,4.808563832,6.3115149034,22.2710313588  
C,0,3.8434415033,5.3061867439,22.2223549918  
C,0,1.4532356792,0.063525688,15.6237172068  
C,0,1.9846469754,1.1024362129,14.8504895944  
C,0,2.4967769698,0.8321048515,13.5826163086  
C,0,2.4632240346,-0.4661952573,13.0696155146  
C,0,1.9215029775,-1.4992726114,13.8365937852  
C,0,1.4232521978,-1.240280313,15.1139459998  
N,0,4.5750795537,2.1999159557,19.4988756855  
N,0,2.2871860171,3.9116511284,20.9483871921  
N,0,0.9111478358,0.3328785583,16.9134707379  
H,0,3.7593093001,-0.6016947719,16.1069884791  
H,0,6.1174986729,-1.2095412101,15.8300027797  
H,0,7.8640425659,-0.2298354108,17.2961267485  
H,0,7.2462610599,1.3846636042,19.0752558736  
H,0,-2.0643224244,3.150814614,20.2700200481  
H,0,-2.7855804902,4.8642679008,21.8732720636  
H,0,-1.1162513491,6.2270171863,23.1040605538

H,0,1.3091393443,5.8802664609,22.731060104  
H,0,-1.2085020615,-0.9385546274,15.5208821557  
H,0,-3.5307803053,-0.9282158238,16.3910095885  
H,0,-4.0656662488,0.2063936575,18.5325102133  
H,0,-2.3244343961,1.4055920599,19.7843164924  
H,0,6.7509689482,3.6671171705,19.9244017807  
H,0,7.9668209538,3.9189656057,22.0758739594  
H,0,7.0780140856,2.8513592546,24.1386836558  
H,0,4.9862052185,1.5104073845,24.0285029618  
H,0,3.8114902557,1.2145846439,21.8618828216  
H,0,3.3928374969,5.1520716611,18.8542345296  
H,0,5.1398746953,6.912881003,18.9412235177  
H,0,6.0382186783,7.6699243924,21.1335913659  
H,0,5.2003219931,6.6307618869,23.2321581738  
H,0,3.4984642089,4.8248113593,23.1306248626  
H,0,1.9979355288,2.1103514258,15.2512467976  
H,0,2.9155655436,1.6406060151,12.9909985783  
H,0,2.8586869093,-0.6717926623,12.0796483946  
H,0,1.8975401675,-2.5128268024,13.4475009228  
H,0,1.030196767,-2.0424939838,15.7294734628

-----  
**ITN-3**

Opt @ B3LYP-D3(BJ)/def2-TZVP in DMSO (PCM)  
SCF Done: E(RB3LYP) = -1781.88294387 a.u.  
Zero-point correction = 0.570923 (Hartree/Particle)  
Sum of electronic and thermal Free Energies = -1781.375091 a.u.  
TD-DFT calculations  
Sp @ B3LYP-D3(BJ)/def2-TZVP in DMSO (PCM)  
Excited State 1: Singlet-A 3.2008 eV 387.36 nm f = 0.2301  
<S\*\*2> = 0.000

-----  
C,0,-0.4563199391,-0.5041219072,-0.1630411949  
C,0,0.9263955131,-0.8054065836,-0.1604407853  
C,0,1.8308467071,0.2779144422,-0.1758067454  
C,0,1.3911180203,1.614350961,-0.3385939157  
C,0,0.0047510621,1.8946702938,-0.233578875  
C,0,-0.9021409129,0.8224427475,-0.0863708667



C,0,-0.294943016,-2.7511288332,-0.3012946078  
C,0,1.0306785383,-2.2525929289,-0.2500052883  
C,0,2.0843767018,-3.1668091166,-0.3680424149  
C,0,1.8079574385,-4.5180622491,-0.5107752992  
C,0,0.4902576051,-4.9842587,-0.5541161725  
C,0,-0.576989652,-4.1033712137,-0.4598716172  
C,0,-2.1331659763,2.705137029,0.0668450389  
C,0,-0.7887550486,3.1063199282,-0.1408364356  
C,0,-0.5012148463,4.4757884341,-0.1327326113  
C,0,-1.5213191617,5.3947610291,0.0575390218  
C,0,-2.8394665967,4.9718065235,0.2594729347  
C,0,-3.157816941,3.6222264249,0.2768524345  
C,0,3.6912126535,1.5494395554,-0.3783119075  
C,0,5.0050646983,2.0017262845,-0.4318802418  
C,0,5.2203421348,3.3434379017,-0.7124272202  
C,0,4.144568535,4.206892559,-0.9457487564  
C,0,2.8362049285,3.7550366845,-0.8580311766  
C,0,2.5813028394,2.4180135531,-0.5325845368  
C,0,-2.5007137396,-1.7864529763,-0.8049469742  
C,0,-3.4581265256,-2.5931741192,-0.2011666523  
C,0,-4.7115002894,-2.7252098324,-0.7823101254  
C,0,-5.0154332237,-2.0458681897,-1.9567111463  
C,0,-4.0553190277,-1.2369421411,-2.5548064587  
C,0,-2.7949407979,-1.1122824297,-1.9868698473  
C,0,-3.2182615685,0.635818733,0.827924228  
C,0,-2.8926759763,-0.0247891015,2.0098457218  
C,0,-3.8869989536,-0.6598892348,2.7409684438  
C,0,-5.2075697762,-0.622955555,2.3065239682  
C,0,-5.5281393053,0.0471323827,1.1312517351  
C,0,-4.5364308041,0.6709070137,0.3872272828  
C,0,4.0355137016,-0.759060367,0.4119048798  
C,0,3.7460909968,-1.2248451208,1.6911783888  
C,0,4.5277433574,-2.2249970887,2.2534501055  
C,0,5.609037941,-2.7471029422,1.5510183954  
C,0,5.9059302141,-2.2650627168,0.2803297114  
C,0,5.1184220606,-1.2748667732,-0.2937995708  
N,0,-1.1955658703,-1.6839805488,-0.2399459505

N, 0, -2.2018734759, 1.3113054503, 0.0917351574  
N, 0, 3.2271501103, 0.2538493639, -0.1675200537  
H, 0, 3.1087114096, -2.8378674577, -0.3662217574  
H, 0, 2.6272198738, -5.2195614881, -0.5985404357  
H, 0, 0.2968343501, -6.0423453014, -0.6728394028  
H, 0, -1.5953282502, -4.4580202754, -0.5177379939  
H, 0, 0.5083220993, 4.8318662276, -0.2414253231  
H, 0, -1.2913357741, 6.4520448082, 0.0612500312  
H, 0, -3.6212987644, 5.7038174115, 0.4141216968  
H, 0, -4.1711782722, 3.2956981474, 0.4573001152  
H, 0, 5.8348561058, 1.3284781552, -0.2728564043  
H, 0, 6.2336596147, 3.7189545796, -0.7683628786  
H, 0, 4.3338988097, 5.2412854068, -1.2009052899  
H, 0, 2.032143272, 4.4381553587, -1.0731643846  
H, 0, -3.2281861219, -3.0876882206, 0.7314231431  
H, 0, -5.4587662494, -3.3437579224, -0.3034674214  
H, 0, -5.9980093803, -2.1405251833, -2.3996520328  
H, 0, -4.2850199574, -0.7043522836, -3.4683559844  
H, 0, -2.040510658, -0.4912001768, -2.4497679996  
H, 0, -1.8651027731, -0.0433290041, 2.3459342356  
H, 0, -3.629019235, -1.1803357089, 3.654028085  
H, 0, -5.9812064367, -1.1201098499, 2.8765553058  
H, 0, -6.5506313404, 0.066166463, 0.7783170584  
H, 0, -4.7735474524, 1.1571342527, -0.5478593756  
H, 0, 2.9031078709, -0.8135504618, 2.2293150358  
H, 0, 4.293116364, -2.594744362, 3.2428476983  
H, 0, 6.2164161829, -3.5268990465, 1.9907471949  
H, 0, 6.7425255273, -2.6705643269, -0.2730269722  
H, 0, 5.3215258527, -0.919417367, -1.2944819435

---

#### 4. General procedure for photocatalytic C-H functionalization

The synthesis of **1a-1u** was accomplished following the reported procedures<sup>[1,2]</sup>.

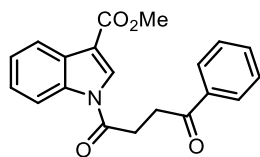

**1a**, white solid, m.p. = 159.3-162.1 °C. <sup>1</sup>H NMR (400 MHz, CDCl<sub>3</sub>) δ 8.44-8.41 (m, 1H), 8.33 (s, 1H), 8.18-8.04 (m, 3H), 7.63-7.38 (m, 5H), 3.96 (s, 3H), 3.56 (t, *J* = 6.4 Hz, 2H), 3.44 (t, *J* = 6.0 Hz, 2H). <sup>13</sup>C NMR (100 MHz, CDCl<sub>3</sub>) δ 197.8, 170.8, 164.6, 136.4, 136.2, 133.7, 130.8, 128.9, 128.3, 127.4, 126.1, 125.0, 121.7, 116.6, 114.0, 51.8, 32.9, 29.9. IR (thin film): ν<sub>max</sub> (cm<sup>-1</sup>) = 3151, 2922, 1704, 1682, 1553, 1443, 1387, 1364, 1318, 1255, 1207, 1181, 1145, 1105, 1081, 1045, 1017, 988, 969, 938, 777, 763, 742, 695. HRMS (ESI) calcd for C<sub>20</sub>H<sub>17</sub>NaNO<sub>4</sub> [M+Na]<sup>+</sup>: 358.1055. Found: 358.1051.

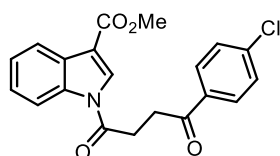

**1b**, yellow solid, m.p. = 145.7-147.9 °C. <sup>1</sup>H NMR (400 MHz, CDCl<sub>3</sub>) δ 8.42-8.40 (m, 1H), 8.32 (s, 1H), 8.17-7.97 (m, 3H), 7.49-7.38 (m, 4H), 3.96 (s, 3H), 3.53-3.50 (m, 2H), 3.45-3.42 (m, 2H). <sup>13</sup>C NMR (100 MHz, CDCl<sub>3</sub>) δ 196.6, 170.7, 164.5, 140.1, 136.2, 134.7, 130.7, 129.7, 129.2, 127.4, 126.1, 125.0, 121.7, 116.6, 114.1, 51.8, 32.8, 29.8. IR (thin film): ν<sub>max</sub> (cm<sup>-1</sup>) = 3129, 3094, 2945, 1722, 1705, 1686, 1583, 1560, 1446, 1391, 1273, 1251, 1217, 1183, 1151, 1109, 1089, 1037, 1011, 972, 950, 904, 835, 817, 804, 762, 746, 661. HRMS (ESI) calcd for C<sub>20</sub>H<sub>16</sub>ClNaNO<sub>4</sub> [M+Na]<sup>+</sup>: 392.0666. Found: 392.0662.

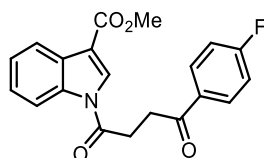

**1c**, white solid, m.p. = 136.1-139.5 °C. <sup>1</sup>H NMR (400 MHz, CDCl<sub>3</sub>) δ 8.38-8.35 (m, 1H), 8.23 (s, 1H), 8.13-8.00 (m, 3H), 7.36-7.34 (m, 2H), 7.15-7.11 (m, 2H), 3.93 (s, 3H), 3.45-3.42 (m, 2H), 3.37-3.34 (m, 2H). <sup>13</sup>C NMR (100 MHz, CDCl<sub>3</sub>) δ 196.1, 170.7, 166.0 (d, *J* = 254.0 Hz), 164.4, 136.0, 132.8 (d, *J* = 3.0 Hz), 130.8 (d, *J* = 9.5 Hz), 130.7, 127.3, 126.0, 124.8, 121.6, 116.5, 115.8 (d, *J* = 22.0 Hz), 113.8, 51.7, 32.6, 29.7. <sup>19</sup>F NMR (375 MHz, CDCl<sub>3</sub>) δ -104.39 to -104.47 (m). IR (thin film): ν<sub>max</sub> (cm<sup>-1</sup>) = 2957, 1708, 1683, 1594, 1556, 1442, 1408, 1382, 1316, 1254, 1227, 1207, 1185, 1174, 1157, 1143, 1104, 1077, 1041, 1017, 992, 963, 939, 930, 876, 835, 763, 738, 671. HRMS (ESI) calcd for C<sub>20</sub>H<sub>16</sub>FNANO<sub>4</sub> [M+Na]<sup>+</sup>: 376.0961. Found: 376.0958.

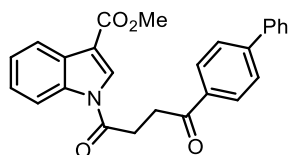

**1d**, white solid, m.p. = 199.7-200.3 °C.  $^1\text{H}$  NMR (400 MHz,  $\text{CDCl}_3$ )  $\delta$  8.45-8.43 (m, 1H), 8.35 (s, 1H), 8.19-8.11 (m, 3H), 7.74-7.64 (m, 4H), 7.51-7.38 (m, 5H), 3.97 (s, 3H), 3.59 (t,  $J = 6.0$  Hz, 2H), 3.47 (t,  $J = 6.4$  Hz, 2H).  $^{13}\text{C}$  NMR (100 MHz,  $\text{CDCl}_3$ )  $\delta$  197.4, 170.9, 164.6, 146.3, 139.9, 136.2, 135.1, 130.9, 129.1, 128.9, 128.5, 127.5, 127.4, 126.1, 125.0, 121.7, 116.7, 114.0, 51.8, 32.9, 29.9. IR (thin film):  $\nu_{\text{max}}$  ( $\text{cm}^{-1}$ ) = 3152, 2922, 2360, 1727, 1704, 1689, 1605, 1553, 1478, 1442, 1382, 1356, 1318, 1214, 1184, 1145, 1106, 1080, 1044, 1016, 998, 987, 968, 954, 932, 896, 836, 777, 764, 742, 723, 698, 673. HRMS (ESI) calcd for  $\text{C}_{26}\text{H}_{21}\text{NaNO}_4$   $[\text{M}+\text{Na}]^+$ : 434.1368. Found: 434.1366.

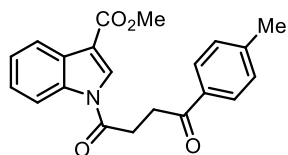

**1e**, white solid, m.p. = 140.7-142.5 °C.  $^1\text{H}$  NMR (400 MHz,  $\text{CDCl}_3$ )  $\delta$  8.42-8.39 (m, 1H), 8.30 (s, 1H), 8.16-7.92 (m, 3H), 7.38-7.27 (m, 4H), 3.95 (s, 3H), 3.50 (t,  $J = 6.8$  Hz, 2H), 3.39 (t,  $J = 6.4$  Hz, 2H), 2.42 (s, 3H).  $^{13}\text{C}$  NMR (100 MHz,  $\text{CDCl}_3$ )  $\delta$  197.3, 170.9, 164.5, 144.5, 136.1, 133.9, 130.8, 129.5, 128.3, 127.4, 126.0, 124.9, 121.6, 116.6, 113.9, 51.7, 32.7, 29.8, 21.8. IR (thin film):  $\nu_{\text{max}}$  ( $\text{cm}^{-1}$ ) = 3129, 3094, 2921, 2360, 1725, 1704, 1681, 1606, 1558, 1444, 1392, 1357, 1274, 1255, 1218, 1183, 1147, 1107, 1042, 972, 951, 933, 903, 812, 804, 777, 764, 745, 698. HRMS (ESI) calcd for  $\text{C}_{21}\text{H}_{19}\text{NaNO}_4$   $[\text{M}+\text{Na}]^+$ : 372.1212. Found: 372.1208.

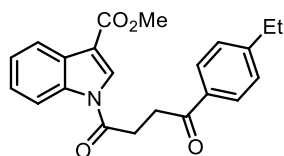

**1f**, yellow solid, m.p. = 140.8-142.2 °C.  $^1\text{H}$  NMR (400 MHz,  $\text{CDCl}_3$ )  $\delta$  8.43-8.40 (m, 1H), 8.32 (s, 1H), 8.17-7.96 (m, 3H), 7.39-7.37 (m, 2H), 7.31 (d,  $J = 8.4$  Hz, 2H), 3.95 (s, 3H), 3.52 (t,  $J = 6.8$  Hz, 2H), 3.42 (t,  $J = 6.0$  Hz, 2H), 2.72 (q,  $J = 7.6$  Hz, 2H), 1.27 (t,  $J = 7.6$  Hz, 3H).  $^{13}\text{C}$  NMR (100 MHz,  $\text{CDCl}_3$ )  $\delta$  197.4, 170.9, 164.5, 150.6, 136.1, 134.1, 130.9, 128.5, 128.3, 127.4, 126.0, 124.9, 121.6, 116.6, 113.9, 51.8, 32.7, 29.9, 29.1, 15.3. IR (thin film):  $\nu_{\text{max}}$  ( $\text{cm}^{-1}$ ) = 3130, 3095, 2965, 2943, 1703, 1678, 1605, 1584, 1560, 1514, 1478, 1447, 1433, 1392, 1368, 1343, 1302, 1273, 1254, 1218,

1179, 1153, 1110, 1064, 1038, 973, 955, 904, 829, 804, 777, 761, 746, 724, 662.  
HRMS (ESI) calcd for C<sub>22</sub>H<sub>22</sub>NO<sub>4</sub> [M+H]<sup>+</sup>: 364.1549. Found: 364.1537.

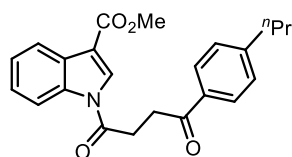

**1g**, yellow solid, m.p. = 108.1-109.5 °C. <sup>1</sup>H NMR (400 MHz, CDCl<sub>3</sub>) δ 8.43-8.40 (m, 1H), 8.31 (s, 1H), 8.18-7.95 (m, 3H), 7.39-7.28 (m, 4H), 3.95 (s, 3H), 3.52 (t, *J* = 6.8 Hz, 2H), 3.41 (t, *J* = 5.6 Hz, 2H), 2.65 (t, *J* = 8.4 Hz, 2H), 1.68-1.57 (m, 2H), 0.95 (t, *J* = 7.2 Hz, 3H). <sup>13</sup>C NMR (100 MHz, CDCl<sub>3</sub>) δ 197.4, 170.9, 164.5, 149.1, 136.1, 134.1, 130.9, 128.9, 128.4, 127.4, 127.2, 126.0, 124.9, 121.6, 116.6, 113.9, 51.7, 38.1, 32.7, 29.9, 24.3, 13.9. IR (thin film): ν<sub>max</sub> (cm<sup>-1</sup>) = 3130, 3095, 2930, 2224, 1704, 1682, 1604, 1583, 1561, 1478, 1447, 1389, 1304, 1273, 1256, 1218, 1198, 1181, 1152, 1109, 1038, 1021, 974, 950, 903, 815, 580, 776, 759, 746, 700, 664, 617. HRMS (ESI) calcd for C<sub>23</sub>H<sub>24</sub>NO<sub>4</sub> [M+H]<sup>+</sup>: 378.1705. Found: 378.1700.

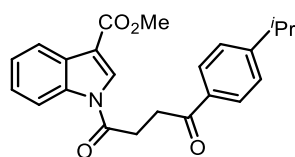

**1h**, white solid, m.p. = 139.7-141.5 °C. <sup>1</sup>H NMR (400 MHz, CDCl<sub>3</sub>) δ 8.43-8.41 (m, 1H), 8.32 (s, 1H), 8.17-7.97 (m, 3H), 7.39-7.33 (m, 4H), 3.95 (s, 3H), 3.52 (t, *J* = 6.8 Hz, 2H), 3.42 (t, *J* = 5.6 Hz, 2H), 3.03-2.93 (m, 1H), 1.28 (d, *J* = 6.8 Hz, 6H). <sup>13</sup>C NMR (100 MHz, CDCl<sub>3</sub>) δ 197.4, 170.9, 164.5, 155.2, 136.2, 134.3, 130.9, 128.5, 127.4, 126.9, 126.0, 124.9, 121.7, 116.6, 113.9, 51.7, 34.4, 32.7, 29.9, 23.8. IR (thin film): ν<sub>max</sub> (cm<sup>-1</sup>) = 2923, 1706, 1678, 1604, 1557, 1478, 1442, 1387, 1366, 1317, 1253, 1209, 1179, 1143, 1104, 1045, 988, 969, 935, 900, 831, 737, 672. HRMS (ESI) calcd for C<sub>23</sub>H<sub>23</sub>NaNO<sub>4</sub> [M+Na]<sup>+</sup>: 400.1525. Found: 400.1519.

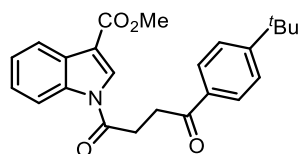

**1i**, white solid, m.p. = 153.3-154.4 °C. <sup>1</sup>H NMR (400 MHz, CDCl<sub>3</sub>) δ 8.43-8.41 (m, 1H), 8.33 (s, 1H), 8.17-8.15 (m, 1H), 7.98 (d, *J* = 8.8 Hz, 2H), 7.51 (d, *J* = 8.8 Hz, 2H), 7.40-7.36 (m, 2H), 3.96 (s, 3H), 3.53 (t, *J* = 5.6 Hz, 2H), 3.43 (t, *J* = 5.6 Hz, 2H), 1.36 (s, 9H). <sup>13</sup>C NMR (100 MHz, CDCl<sub>3</sub>) δ 197.4, 170.9, 164.6, 157.4, 136.2, 133.9, 130.9, 128.2, 127.4, 126.1, 125.8, 124.9, 121.7, 116.6, 113.9, 51.8, 35.3, 32.7, 31.2.

29.9. IR (thin film):  $\nu_{\text{max}}$  ( $\text{cm}^{-1}$ ) = 3131, 3096, 2947, 1717, 1703, 1663, 1603, 1585, 1561, 1514, 1477, 1446, 1433, 1390, 1370, 1342, 1315, 1300, 1251, 1235, 1219, 1200, 1179, 1153, 1111, 1064, 1045, 975, 928, 900, 878, 855, 815, 776, 762, 745, 724, 663, 649. HRMS (ESI) calcd for  $\text{C}_{24}\text{H}_{26}\text{NO}_4$   $[\text{M}+\text{H}]^+$ : 392.1862. Found: 392.1852.

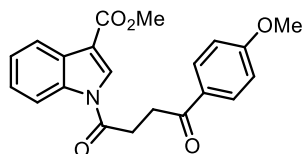

**1j**, white solid, m.p. = 175.3-178.1 °C.  $^1\text{H}$  NMR (400 MHz,  $\text{CDCl}_3$ )  $\delta$  8.42-8.40 (m, 1H), 8.31 (s, 1H), 8.16-8.14 (m, 1H), 8.01 (d,  $J$  = 8.8 Hz, 2H), 7.40-7.35 (m, 2H), 6.95 (d,  $J$  = 8.8 Hz, 2H), 3.95 (s, 3H), 3.87 (s, 3H), 3.48 (t,  $J$  = 6.4 Hz, 2H), 3.40 (t,  $J$  = 6.0 Hz, 2H).  $^{13}\text{C}$  NMR (100 MHz,  $\text{CDCl}_3$ )  $\delta$  196.2, 171.0, 164.6, 163.9, 136.2, 130.9, 130.6, 129.5, 127.4, 126.0, 124.9, 121.7, 116.6, 113.9, 55.6, 51.8, 32.5, 29.9. IR (thin film):  $\nu_{\text{max}}$  ( $\text{cm}^{-1}$ ) = 3095, 2927, 2224, 1705, 1678, 1603, 1583, 1561, 1511, 1478, 1445, 1386, 1320, 1273, 1254, 1218, 1197, 1181, 1152, 1106, 1045, 1023, 984, 973, 952, 935, 903, 834, 805, 777, 757, 672. HRMS (ESI) calcd for  $\text{C}_{21}\text{H}_{20}\text{NO}_5$   $[\text{M}+\text{H}]^+$ : 366.1341. Found: 366.1333.

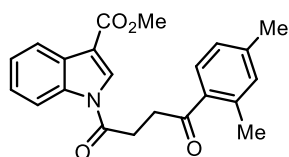

**1k**, yellow solid, m.p. = 157.3-160.9 °C.  $^1\text{H}$  NMR (400 MHz,  $\text{CDCl}_3$ )  $\delta$  8.45-8.41 (m, 1H), 8.34 (s, 1H), 8.18-8.15 (m, 1H), 7.79 (d,  $J$  = 8.0 Hz, 1H), 7.42-7.36 (m, 2H), 7.13-7.09 (m, 2H), 3.96 (s, 3H), 3.49-3.40 (m, 4H), 2.51 (s, 3H), 2.38 (s, 3H).  $^{13}\text{C}$  NMR (100 MHz,  $\text{CDCl}_3$ )  $\delta$  200.5, 170.9, 164.6, 142.7, 139.3, 136.2, 134.0, 133.2, 130.9, 129.5, 127.4, 126.6, 126.1, 124.9, 121.7, 116.7, 113.9, 51.8, 35.0, 30.2, 21.9, 21.6. IR (thin film):  $\nu_{\text{max}}$  ( $\text{cm}^{-1}$ ) = 1703, 1651, 1613, 1586, 1575, 1514, 1479, 1438, 1393, 1376, 1343, 1305, 1276, 1197, 1179, 1154, 1106, 1041, 975, 940, 904, 855, 818, 777, 756, 741, 715, 664, 647. HRMS (ESI) calcd for  $\text{C}_{22}\text{H}_{21}\text{NaNO}_4$   $[\text{M}+\text{Na}]^+$ : 386.1368. Found: 386.1363.

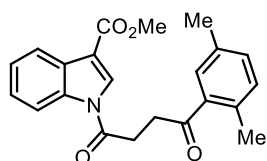

**1l**, pink solid, m.p. = 146.8-148.3 °C.  $^1\text{H}$  NMR (400 MHz,  $\text{CDCl}_3$ )  $\delta$  8.47-8.43 (m, 1H), 8.35 (s, 1H), 8.20-8.16 (m, 1H), 7.66 (s, 1H), 7.43-7.40 (m, 2H), 7.26-7.17 (m,

2H), 3.98 (s, 3H), 3.50-3.42 (m, 4H), 2.49 (s, 3H), 2.42 (s, 3H).  $^{13}\text{C}$  NMR (100 MHz,  $\text{CDCl}_3$ )  $\delta$  201.5, 170.9, 164.6, 137.0, 136.2, 135.54, 135.46, 132.6, 132.1, 130.8, 129.5, 127.4, 126.0, 124.9, 121.7, 116.6, 113.9, 51.8, 35.3, 30.1, 21.12, 21.08. IR (thin film):  $\nu_{\text{max}}$  ( $\text{cm}^{-1}$ ) = 3131, 3096, 2944, 1703, 1604, 1585, 1561, 1514, 1479, 1447, 1390, 1353, 1343, 1326, 1301, 1272, 1254, 1200, 1185, 1147, 1111, 1064, 1042, 1000, 972, 949, 904, 877, 805, 776, 760, 745, 724, 655, 617. HRMS (ESI) calcd for  $\text{C}_{22}\text{H}_{22}\text{NO}_4$   $[\text{M}+\text{H}]^+$ : 364.1549. Found: 364.1545.

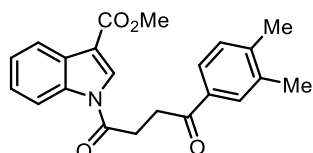

**1m**, white solid, m.p. = 169.0-170.4 °C.  $^1\text{H}$  NMR (400 MHz,  $\text{CDCl}_3$ )  $\delta$  8.44-8.42 (m, 1H), 8.35 (s, 1H), 8.18-8.16 (m, 1H), 7.81 (s, 1H), 7.78 (d,  $J = 7.6$  Hz, 1H), 7.40-7.37 (m, 2H), 7.25-7.24 (m, 1H), 3.97 (s, 3H), 3.54 (t,  $J = 6.8$  Hz, 2H), 3.44 (t,  $J = 5.6$  Hz, 2H), 2.34 (s, 6H).  $^{13}\text{C}$  NMR (100 MHz,  $\text{CDCl}_3$ )  $\delta$  197.6, 171.0, 164.6, 143.3, 137.2, 136.2, 134.3, 130.9, 130.1, 129.4, 127.4, 126.1, 126.0, 124.9, 121.7, 116.7, 113.9, 51.8, 32.8, 30.0, 20.3, 20.0. IR (thin film):  $\nu_{\text{max}}$  ( $\text{cm}^{-1}$ ) = 3132, 3097, 2946, 1704, 1680, 1605, 1584, 1559, 1479, 1445, 1387, 1343, 1304, 1273, 1256, 1217, 1180, 1152, 1107, 1041, 1020, 973, 950, 903, 858, 820, 805, 777, 757, 688, 663, 614. HRMS (ESI) calcd for  $\text{C}_{22}\text{H}_{22}\text{NO}_4$   $[\text{M}+\text{H}]^+$ : 364.1549. Found: 364.1540.

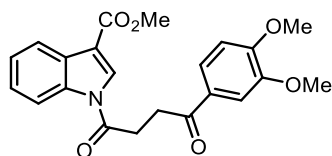

**1n**, white solid, m.p. = 198.5-199.1 °C.  $^1\text{H}$  NMR (400 MHz,  $\text{CDCl}_3$ )  $\delta$  8.43-8.40 (m, 1H), 8.32 (s, 1H), 8.16-8.14 (m, 1H), 7.70-7.67 (m, 1H), 7.55 (d,  $J = 2.0$  Hz, 1H), 7.40-7.35 (m, 2H), 6.91 (d,  $J = 8.4$  Hz, 1H), 3.96 and 3.95 (s, 6H), 3.93 (s, 3H), 3.51 (t,  $J = 6.0$  Hz, 2H), 3.41 (t,  $J = 6.0$  Hz, 2H).  $^{13}\text{C}$  NMR (100 MHz,  $\text{CDCl}_3$ )  $\delta$  196.3, 171.0, 164.5, 153.7, 149.2, 136.2, 130.9, 129.6, 127.4, 126.0, 124.9, 123.0, 121.7, 116.6, 114.0, 110.2, 56.2, 56.1, 51.8, 32.4, 30.0. IR (thin film):  $\nu_{\text{max}}$  ( $\text{cm}^{-1}$ ) = 3009, 2954, 1716, 1668, 1599, 1587, 1558, 1517, 1479, 1432, 1417, 1350, 1326, 1301, 1282, 1264, 1209, 1200, 1185, 1144, 1104, 1037, 1022, 975, 947, 900, 884, 816, 790, 775, 761, 739, 721, 671, 622. HRMS (ESI) calcd for  $\text{C}_{22}\text{H}_{22}\text{NO}_6$   $[\text{M}+\text{H}]^+$ : 396.1447. Found: 396.1444.

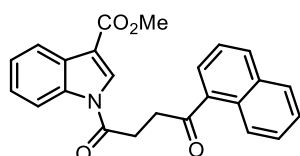

**1o**, yellow solid, m.p. = 191.4-192.0 °C.  $^1\text{H}$  NMR (400 MHz,  $\text{CDCl}_3$ )  $\delta$  8.60 (s, 1H), 8.46-8.43 (m, 1H), 8.37 (s, 1H), 8.19-8.17 (m, 1H), 8.10-8.08 (m, 1H), 8.00 (d,  $J$  = 8.0 Hz, 1H), 7.94-7.89 (m, 2H), 7.65-7.56 (m, 2H), 7.42-7.37 (m, 2H), 3.98 (s, 3H), 3.71 (t,  $J$  = 6.4 Hz, 2H), 3.51 (t,  $J$  = 6.4 Hz, 2H).  $^{13}\text{C}$  NMR (100 MHz,  $\text{CDCl}_3$ )  $\delta$  197.7, 170.9, 164.6, 136.2, 135.9, 133.7, 132.6, 130.9, 130.2, 129.8, 128.8, 128.7, 128.0, 127.4, 127.1, 126.1, 125.0, 123.9, 121.7, 116.7, 114.0, 51.8, 32.9, 30.0. IR (thin film):  $\nu_{\text{max}}$  ( $\text{cm}^{-1}$ ) = 2947, 1706, 1679, 1621, 1605, 1584, 1553, 1479, 1444, 1433, 1386, 1370, 1317, 1273, 1255, 1217, 1194, 1181, 1146, 1106, 1092, 1043, 1019, 973, 941, 902, 858, 829, 818, 777, 758, 687, 671, 623, 613. HRMS (ESI) calcd for  $\text{C}_{24}\text{H}_{19}\text{NaNO}_4$   $[\text{M}+\text{Na}]^+$ : 408.1212. Found: 408.1201.

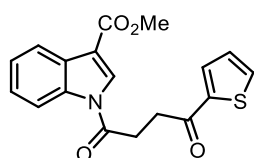

**1p**, white solid, m.p. = 168.6-170.1 °C.  $^1\text{H}$  NMR (400 MHz,  $\text{CDCl}_3$ )  $\delta$  8.43-8.39 (m, 1H), 8.29 (s, 1H), 8.17-8.13 (m, 1H), 7.85-7.84 (m, 1H), 7.69-7.67 (m, 1H), 7.40-7.36 (m, 2H), 7.18-7.16 (m, 1H), 3.95 (s, 3H), 3.51-3.41 (m, 4H).  $^{13}\text{C}$  NMR (100 MHz,  $\text{CDCl}_3$ )  $\delta$  190.6, 170.6, 164.5, 143.4, 136.1, 134.2, 132.5, 130.8, 128.4, 127.4, 126.1, 125.0, 121.7, 116.6, 114.0, 51.8, 33.3, 29.8. IR (thin film):  $\nu_{\text{max}}$  ( $\text{cm}^{-1}$ ) = 3095, 2920, 1705, 1675, 1605, 1583, 1553, 1489, 1479, 1446, 1432, 1387, 1370, 1343, 1312, 1274, 1254, 1219, 1180, 1153, 1126, 1106, 1092, 1042, 1002, 973, 944, 920, 904, 858, 828, 804, 760, 732, 722, 687, 671, 623. HRMS (ESI) calcd for  $\text{C}_{18}\text{H}_{16}\text{NO}_4\text{S}$   $[\text{M}+\text{H}]^+$ : 342.0800. Found: 342.0791.

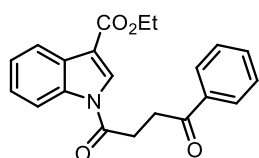

**1q**, yellow solid, m.p. = 152.8-154.6 °C.  $^1\text{H}$  NMR (400 MHz,  $\text{CDCl}_3$ )  $\delta$  8.44-8.42 (m, 1H), 8.33 (s, 1H), 8.19-8.04 (m, 3H), 7.64-7.36 (m, 5H), 4.44 (q,  $J$  = 7.2 Hz, 2H), 3.57 (t,  $J$  = 6.8 Hz, 2H), 3.47 (t,  $J$  = 6.0 Hz, 2H), 1.46 (t,  $J$  = 6.8 Hz, 3H).  $^{13}\text{C}$  NMR (100 MHz,  $\text{CDCl}_3$ )  $\delta$  197.8, 170.8, 164.2, 136.4, 136.2, 133.7, 130.7, 128.9, 128.3, 127.5, 126.1, 124.9, 121.8, 116.6, 114.4, 60.7, 32.9, 29.9, 14.6. IR (thin film):  $\nu_{\text{max}}$



( $\text{cm}^{-1}$ ) = 2984, 2928, 2852, 1705, 1682, 1646, 1595, 1557, 1480, 1399, 1388, 1367, 1341, 1317, 1254, 1216, 1205, 1185, 1145, 1104, 1045, 1017, 1006, 968, 947, 931, 905, 775, 768, 753, 739, 694, 679. HRMS (ESI) calcd for  $\text{C}_{21}\text{H}_{19}\text{NaNO}_4$   $[\text{M}+\text{Na}]^+$ : 372.1212. Found: 372.1207.

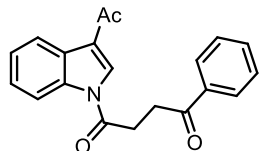

**1r**, yellow solid, m.p. = 167.6-168.4 °C.  $^1\text{H}$  NMR (400 MHz,  $\text{CDCl}_3$ )  $\delta$  8.40-8.34 (m, 2H), 8.24 (s, 1H), 8.07-8.04 (m, 2H), 7.64-7.60 (m, 1H), 7.51 (t,  $J$  = 8.0 Hz, 2H), 7.42-7.37 (m, 2H), 3.59 (t,  $J$  = 6.8 Hz, 2H), 3.47 (t,  $J$  = 6.0 Hz, 2H), 2.61 (s, 3H).  $^{13}\text{C}$  NMR (100 MHz,  $\text{CDCl}_3$ )  $\delta$  197.9, 194.0, 170.8, 136.33, 136.25, 133.8, 130.9, 128.9, 128.3, 127.3, 126.4, 125.3, 122.7, 122.1, 116.3, 32.9, 30.0, 28.1. IR (thin film):  $\nu_{\text{max}}$  ( $\text{cm}^{-1}$ ) = 3096, 2918, 1718, 1682, 1664, 1595, 1584, 1544, 1514, 1476, 1446, 1388, 1365, 1317, 1300, 1271, 1250, 1218, 1185, 1146, 1101, 1064, 1013, 967, 940, 927, 899, 879, 855, 814, 761, 746, 694, 688, 633. HRMS (ESI) calcd for  $\text{C}_{20}\text{H}_{17}\text{NaNO}_3$   $[\text{M}+\text{Na}]^+$ : 342.1106. Found: 342.1097.

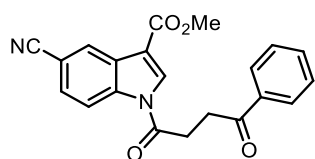

**1s**, yellow solid, m.p. = 164.1-165.2 °C.  $^1\text{H}$  NMR (400 MHz,  $\text{CDCl}_3$ )  $\delta$  8.56-8.53 (m, 2H), 8.47 (s, 1H), 8.06-8.04 (m, 2H), 7.66-7.50 (m, 4H), 4.01 (s, 3H), 3.59 (t,  $J$  = 5.6 Hz, 2H), 3.46 (t,  $J$  = 6.4 Hz, 2H).  $^{13}\text{C}$  NMR (100 MHz,  $\text{CDCl}_3$ )  $\delta$  197.5, 170.9, 163.7, 137.9, 136.2, 133.9, 132.6, 129.2, 128.9, 128.3, 127.5, 126.8, 119.4, 117.7, 113.9, 108.6, 52.2, 32.8, 29.9. IR (thin film):  $\nu_{\text{max}}$  ( $\text{cm}^{-1}$ ) = 3103, 2953, 2904, 2225, 1712, 1692, 1609, 1596, 1577, 1563, 1515, 1459, 1446, 1432, 1387, 1364, 1324, 1275, 1208, 1182, 1146, 1114, 1063, 1045, 1000, 976, 964, 919, 901, 882, 819, 775, 762, 744, 709, 693, 656, 630, 616. HRMS (ESI) calcd for  $\text{C}_{21}\text{H}_{17}\text{N}_2\text{O}_4$   $[\text{M}+\text{H}]^+$ : 361.1188. Found: 361.1183.

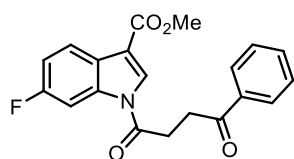

**1t**, yellow solid, m.p. = 150.7-151.8 °C.  $^1\text{H}$  NMR (400 MHz,  $\text{CDCl}_3$ )  $\delta$  8.29 (s, 1H), 8.17-8.03 (m, 4H), 7.63-7.48 (m, 3H), 7.15-7.10 (m, 1H), 3.95 (s, 3H), 3.55 (t,  $J$  = 6.0

Hz, 2H), 3.42 (t,  $J = 6.0$  Hz, 2H).  $^{13}\text{C}$  NMR (100 MHz,  $\text{CDCl}_3$ )  $\delta$  197.6, 170.7, 164.1, 161.5 (d,  $J = 241.0$  Hz), 136.2, 136.1 (d,  $J = 13.0$  Hz), 133.6, 130.8 (d,  $J = 3.0$  Hz), 128.8, 128.2, 123.5, 122.4 (d,  $J = 9.0$  Hz), 113.6, 113.1 (d,  $J = 24.0$  Hz), 103.9 (d,  $J = 28.0$  Hz), 51.7, 32.7, 29.6.  $^{19}\text{F}$  NMR (375 MHz,  $\text{CDCl}_3$ )  $\delta$  -114.97 to -115.03 (m). IR (thin film):  $\nu_{\text{max}}$  ( $\text{cm}^{-1}$ ) = 2956, 2919, 1710, 1674, 1616, 1596, 1581, 1553, 1489, 1480, 1431, 1405, 1385, 1371, 1342, 1312, 1286, 1244, 1219, 1180, 1160, 1126, 1092, 1078, 1064, 1042, 1002, 972, 943, 933, 921, 858, 837, 828, 800, 767, 750, 732, 687, 671, 623. HRMS (ESI) calcd for  $\text{C}_{20}\text{H}_{16}\text{FNaNO}_4$   $[\text{M}+\text{Na}]^+$ : 376.0961. Found: 376.0952.

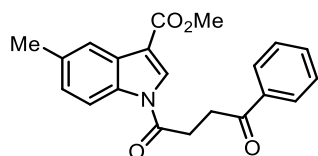

**1u**, yellow solid, m.p. = 157.3-160.9 °C.  $^1\text{H}$  NMR (400 MHz,  $\text{CDCl}_3$ )  $\delta$  8.27-8.02 (m, 4H), 7.94 (s, 1H), 7.61-7.47 (m, 3H), 7.20-7.17 (m, 1H), 3.95 (s, 3H), 3.52 (t,  $J = 6.4$  Hz, 2H), 3.39 (t,  $J = 6.4$  Hz, 2H), 2.47 (s, 3H).  $^{13}\text{C}$  NMR (100 MHz,  $\text{CDCl}_3$ )  $\delta$  197.8, 170.6, 164.6, 136.4, 134.7, 134.3, 133.6, 130.8, 128.8, 128.2, 127.6, 127.3, 121.5, 116.2, 113.6, 51.7, 32.8, 29.7, 21.6. IR (thin film):  $\nu_{\text{max}}$  ( $\text{cm}^{-1}$ ) = 2919, 1708, 1688, 1651, 1615, 1595, 1476, 1450, 1394, 1366, 1343, 1316, 1215, 1184, 1138, 1111, 1043, 993, 968, 945, 918, 857, 818, 774, 764, 753, 739, 717, 691, 670, 630. HRMS (ESI) calcd for  $\text{C}_{21}\text{H}_{19}\text{NaNO}_4$   $[\text{M}+\text{Na}]^+$ : 372.1212. Found: 372.1208.

#### 4.1 Optimization of the reaction conditions for C-H functionalization<sup>a</sup>

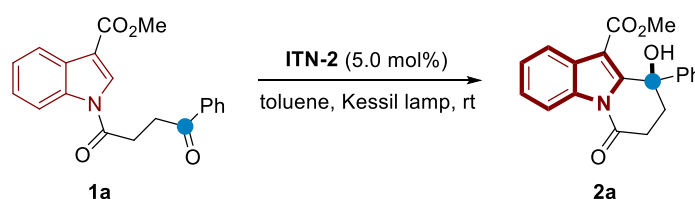

| entry | variations from standard conditions                                                        | time (h) | yield (%) <sup>b</sup> |
|-------|--------------------------------------------------------------------------------------------|----------|------------------------|
| 1     | none                                                                                       | 4        | 90 (89) <sup>c</sup>   |
| 2     | $\text{Ir}(\text{ppy})_3$ instead of <b>ITN-2</b>                                          | 12       | 0                      |
| 3     | $\text{Ir}(\text{ppy})_2(\text{dtbbpy})\text{PF}_6$ instead of <b>ITN-2</b>                | 12       | 0                      |
| 4     | $\text{Ir}[(\text{dFCF}_3\text{ppy})_2(\text{dtbbpy})]\text{PF}_6$ instead of <b>ITN-2</b> | 12       | 0                      |

2

|    |                                                                          |    |       |
|----|--------------------------------------------------------------------------|----|-------|
| 5  | Ru(bpy) <sub>3</sub> Cl <sub>2</sub> ·6H <sub>2</sub> O instead of ITN-2 | 12 | 0     |
| 6  | 4CzIPN instead of ITN-2                                                  | 12 | 11    |
| 7  | PTH instead of ITN-2                                                     | 12 | 13    |
| 8  | Rhodamine B instead of ITN-2                                             | 12 | 0     |
| 9  | Eosin Y instead of ITN-2                                                 | 12 | 0     |
| 10 | Fluorescein instead of ITN-2                                             | 12 | 0     |
| 11 | Rose Bengal instead of ITN-2                                             | 12 | 0     |
| 12 | Methylene Blue instead of ITN-2                                          | 12 | 0     |
| 13 | Thioxanthen-9-one instead of ITN-2                                       | 12 | 11    |
| 14 | ITN-1 instead of ITN-2                                                   | 12 | 6     |
| 15 | ITN-3 instead of ITN-2                                                   | 12 | 15    |
| 16 | CH <sub>3</sub> CN instead of toluene                                    | 4  | trace |
| 17 | EtOH instead of toluene                                                  | 4  | 33    |
| 18 | CH <sub>2</sub> Cl <sub>2</sub> instead of toluene                       | 4  | 11    |
| 19 | no ITN-2                                                                 | 4  | 0     |
| 20 | no light                                                                 | 4  | 0     |

<sup>a</sup>Reaction conditions: a solution of ITN-2 (2.6 mg, 5.0 mol%) and **1a** (0.1 mmol, 1.0 equiv) in toluene (1.0 mL, 0.1 M) was irradiated by 427 nm Kessil lamp (40 W) at room temperature under nitrogen atmosphere for indicated time. <sup>b</sup>Determined by <sup>1</sup>H NMR yield using CH<sub>2</sub>Br<sub>2</sub> as an internal standard. <sup>c</sup>Isolated yield.

#### 4.2 General procedure for photocatalytic C-H functionalization of indole derivatives with ketones

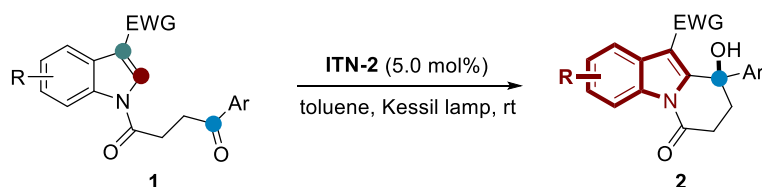

To a flame-dried sealed tube were added ITN-2 (5.20 mg, 5.0 mol%), **1** (0.20 mmol, 1.0 equiv) and toluene (2.0 mL, 0.1 M). The reaction mixture was degassed via freeze-pump-thaw for 3 cycles. After the reaction mixture was thoroughly degassed, the vial was sealed and positioned approximately 2~3 cm from 40 W Kessil lamp. Then the reaction mixture was stirred at room temperature for the indicated time

(monitored by TLC) under nitrogen atmosphere. Afterwards, the reaction mixture was concentrated by rotary evaporation. Then the residue was purified by silica gel column chromatography (PE/EtOAc = 10/1) to afford the desired products **2**. The analytical data of the product **2a-2u** were summarized below.

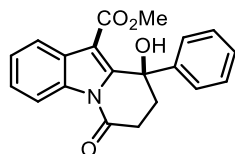

**2a**, blue solid, 59.7 mg, 89% yield, m.p. = 153.1-154.4 °C. <sup>1</sup>H NMR (400 MHz, CDCl<sub>3</sub>) δ 8.65-8.62 (m, 1H), 8.13-8.10 (m, 1H), 7.49-7.41 (m, 2H), 7.34-7.29 (m, 2H), 7.25-7.20 (m, 3H), 3.89 (s, 3H), 2.86-2.36 (m, 4H). <sup>13</sup>C NMR (100 MHz, CDCl<sub>3</sub>) δ 169.5, 167.3, 151.4, 144.1, 134.3, 128.5, 128.3, 126.7, 126.2, 125.6, 125.4, 122.0, 116.8, 110.0, 73.2, 52.5, 37.2, 30.8. IR (thin film): ν<sub>max</sub> (cm<sup>-1</sup>) = 3285, 2952, 1731, 1679, 1544, 1506, 1477, 1435, 1356, 1306, 1278, 1153, 1079, 962, 830, 753, 550, 485, 425. HRMS (ESI) calcd for C<sub>20</sub>H<sub>17</sub>NaNO<sub>4</sub> [M+Na]<sup>+</sup>: 358.1055. Found: 358.1040.

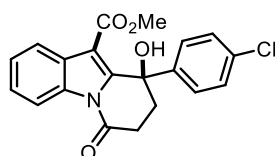

**2b**, blue solid, 52.5 mg, 71% yield, m.p. = 154.6-156.1 °C. <sup>1</sup>H NMR (400 MHz, CDCl<sub>3</sub>) δ 8.63-8.61 (m, 1H), 8.12-8.09 (m, 1H), 7.48-7.40 (m, 2H), 7.28-7.27 (m, 1H), 7.20-7.16 (m, 3H), 3.90 (s, 3H), 2.87-2.31 (m, 4H). <sup>13</sup>C NMR (100 MHz, CDCl<sub>3</sub>) δ 169.2, 167.3, 150.8, 142.8, 134.3, 134.2, 128.8, 127.1, 126.6, 126.4, 125.6, 122.0, 116.9, 110.2, 72.8, 52.7, 37.2, 30.7. IR (thin film): ν<sub>max</sub> (cm<sup>-1</sup>) = 3286, 2952, 1731, 1679, 1545, 1451, 1434, 1356, 1329, 1164, 1153, 1116, 1000, 962, 899, 830, 797, 775, 729, 596, 506, 485, 445. HRMS (ESI) calcd for C<sub>20</sub>H<sub>16</sub>ClNaNO<sub>4</sub> [M+Na]<sup>+</sup>: 392.0666. Found: 392.0665.

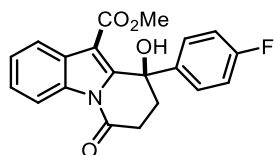

**2c**, blue solid, 64.5 mg, 91% yield, m.p. = 153.9-155.2 °C. <sup>1</sup>H NMR (400 MHz, CDCl<sub>3</sub>) δ 8.63-8.60 (m, 1H), 8.12-8.09 (m, 1H), 7.47-7.39 (m, 2H), 7.23-7.19 (m, 2H), 7.01-6.96 (m, 2H), 3.90 (s, 3H), 2.86-2.31 (m, 4H). <sup>13</sup>C NMR (100 MHz, CDCl<sub>3</sub>) δ 169.2, 167.3, 162.5 (d, *J* = 246.0 Hz), 151.0, 140.0 (d, *J* = 3.0 Hz), 134.3, 127.4 (d, *J* = 8.0 Hz), 126.6, 126.3, 125.5, 122.0, 116.8, 115.4 (d, *J* = 22.0 Hz), 110.1, 72.7, 52.6, 37.3, 30.7. <sup>19</sup>F NMR (375 MHz, CDCl<sub>3</sub>) δ -113.96 to -114.03 (m). IR (thin film):

$\nu_{\text{max}}$  ( $\text{cm}^{-1}$ ) = 3382, 2950, 1732, 1680, 1549, 1507, 1449, 1162, 1148, 1081, 967, 831, 798, 753, 690, 555, 513, 490. HRMS (ESI) calcd for  $\text{C}_{20}\text{H}_{16}\text{FNaNO}_4$   $[\text{M}+\text{Na}]^+$ : 376.0961. Found: 376.0956.

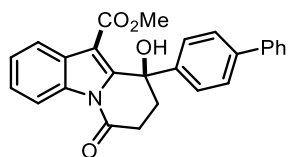

**2d**, blue solid, 68.6 mg, 83% yield, m.p. = 163.7-164.1 °C.  $^1\text{H}$  NMR (400 MHz,  $\text{CDCl}_3$ )  $\delta$  8.66-8.64 (m, 1H), 8.14-8.11 (m, 1H), 7.56-7.39 (m, 8H), 7.34-7.28 (m, 3H), 3.90 (s, 3H), 2.87-2.39 (m, 4H).  $^{13}\text{C}$  NMR (100 MHz,  $\text{CDCl}_3$ )  $\delta$  169.5, 167.4, 151.4, 143.0, 141.1, 140.4, 134.4, 128.9, 127.6, 127.3, 127.2, 126.8, 126.3, 126.1, 125.5, 122.0, 116.9, 110.1, 73.1, 52.6, 37.2, 30.8. IR (thin film):  $\nu_{\text{max}}$  ( $\text{cm}^{-1}$ ) = 3305, 2951, 1730, 1674, 1548, 1356, 1279, 1165, 1151, 1117, 1085, 967, 909, 756, 580, 487. HRMS (ESI) calcd for  $\text{C}_{26}\text{H}_{21}\text{NaNO}_4$   $[\text{M}+\text{Na}]^+$ : 434.1368. Found: 434.1364.

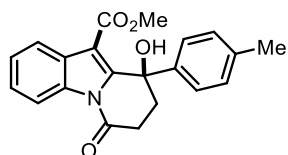

**2e**, white solid, 64.0 mg, 92% yield, m.p. = 149.7-150.2 °C.  $^1\text{H}$  NMR (400 MHz,  $\text{CDCl}_3$ )  $\delta$  8.64-8.61 (m, 1H), 8.12-8.10 (m, 1H), 7.46-7.39 (m, 2H), 7.19 (s, 1H), 7.12-7.09 (m, 3H) 3.89 (s, 3H), 2.83-2.65 (m, 2H), 2.54-2.33 (m, 2H), 2.31 (s, 3H).  $^{13}\text{C}$  NMR (100 MHz,  $\text{CDCl}_3$ )  $\delta$  169.5, 167.3, 151.7, 141.0, 138.0, 134.3, 129.2, 126.8, 126.2, 125.5, 125.4, 122.0, 116.8, 109.9, 73.1, 52.5, 37.2, 30.8, 21.2. IR (thin film):  $\nu_{\text{max}}$  ( $\text{cm}^{-1}$ ) = 3286, 2952, 1731, 1679, 1600, 1545, 1451, 1435, 1356, 1306, 1278, 1164, 1153, 1116, 1079, 962, 830, 797, 753, 728, 550, 485, 444, 428. HRMS (ESI) calcd for  $\text{C}_{21}\text{H}_{19}\text{NaNO}_4$   $[\text{M}+\text{Na}]^+$ : 372.1212. Found: 372.1207.

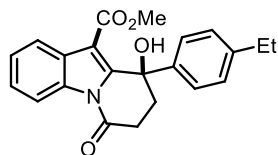

**2f**, blue solid, 66.1 mg, 91% yield, m.p. = 146.1-146.9 °C.  $^1\text{H}$  NMR (400 MHz,  $\text{CDCl}_3$ )  $\delta$  8.64-8.62 (m, 1H), 8.12-8.10 (m, 1H), 7.47-7.40 (m, 2H), 7.20 (s, 1H), 7.14-7.11 (m, 3H), 3.89 (s, 3H), 2.83-2.35 (m, 6H), 1.21 (t,  $J$  = 7.2 Hz, 3H).  $^{13}\text{C}$  NMR (100 MHz,  $\text{CDCl}_3$ )  $\delta$  169.6, 167.3, 151.7, 144.3, 141.2, 134.3, 128.0, 126.8, 126.2, 125.6, 125.4, 122.0, 116.8, 110.0, 73.1, 52.6, 37.2, 30.9, 28.5, 15.4. IR (thin film):  $\nu_{\text{max}}$  ( $\text{cm}^{-1}$ ) = 3286, 2953, 1729, 1679, 1545, 1476, 1451, 1435, 1417, 1356, 1329, 1278,

1236, 1164, 1153, 1117, 962, 910, 866, 797, 775, 729, 663, 596, 550, 486. HRMS (ESI) calcd for  $C_{22}H_{21}NaNO_4$   $[M+Na]^+$ : 386.1368. Found: 386.1361.

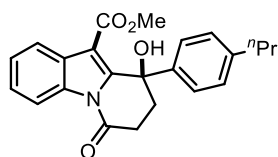

**2g**, blue oil, 64.2 mg, 85% yield, m.p. = 105.1-106.7 °C.  $^1H$  NMR (400 MHz,  $CDCl_3$ )  $\delta$  8.64-8.57 (m, 1H), 8.15-8.10 (m, 1H), 7.47-7.37 (m, 2H), 7.18-7.06 (m, 3H), 6.93-6.91 (m, 1H), 3.89 and 3.81 (s, 3H), 2.84-2.23 (m, 6H), 1.64-1.56 (m, 2H), 0.94-0.90 (m, 3H).  $^{13}C$  NMR (100 MHz,  $CDCl_3$ )  $\delta$  170.0, 164.8, 147.5, 141.5, 137.9, 134.8, 128.9, 127.3, 125.6, 125.2, 121.6, 116.7, 111.2, 51.5, 37.8, 30.0, 28.7, 24.6, 14.0. IR (thin film):  $\nu_{max}$  ( $cm^{-1}$ ) = 3286, 2953, 1729, 1679, 1600, 1507, 1477, 1451, 1435, 1356, 1306, 1278, 1164, 1115, 1079, 962, 830, 753, 596, 444. HRMS (ESI) calcd for  $C_{23}H_{23}NaNO_4$   $[M+Na]^+$ : 400.1525. Found: 400.1526.

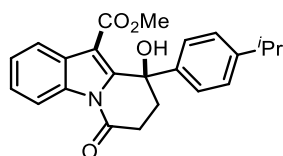

**2h**, blue solid, 62.1 mg, 82% yield, m.p. = 148.3-149.1 °C.  $^1H$  NMR (400 MHz,  $CDCl_3$ )  $\delta$  8.64-8.61 (m, 1H), 8.12-8.09 (m, 1H), 7.46-7.39 (m, 2H), 7.20-7.13 (m, 4H), 3.88 (s, 3H), 2.90-2.35 (m, 5H), 1.22-1.20 (m, 6H).  $^{13}C$  NMR (100 MHz,  $CDCl_3$ )  $\delta$  169.6, 167.4, 151.8, 148.8, 141.2, 134.3, 126.8, 126.6, 126.2, 125.6, 125.4, 122.0, 116.8, 110.0, 73.1, 52.6, 37.2, 33.8, 30.9, 24.0. IR (thin film):  $\nu_{max}$  ( $cm^{-1}$ ) = 3286, 2952, 1729, 1679, 1600, 1544, 1506, 1477, 1356, 1306, 1164, 1079, 961, 866, 753, 690, 596, 550, 485, 429. HRMS (ESI) calcd for  $C_{23}H_{23}NaNO_4$   $[M+Na]^+$ : 400.1525. Found: 400.1520.

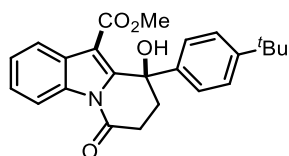

**2i**, yellow solid, 59.7 mg, 76% yield, m.p. = 168.1-169.4 °C. The NMR spectra appear as a mixture of rotamers.  $^1H$  NMR (400 MHz,  $CDCl_3$ )  $\delta$  8.64-8.62 (m, 1H), 8.14-8.10 (m, 1H), 7.47-7.39 (m, 2H), 7.32-7.26 (m, 2H), 7.21-7.12 (m, 2H), 3.89 (s, 3H), 2.83-2.36 (m, 4H), 1.28 (s, 9H).  $^{13}C$  NMR (100 MHz,  $CDCl_3$ )  $\delta$  169.7, 167.4, 151.8, 151.1, 140.8, 134.3, 126.8, 126.2, 125.5, 125.4, 125.3, 122.0, 116.8, 110.0, 73.1, 52.6, 37.2, 34.6, 31.4, 30.9. IR (thin film):  $\nu_{max}$  ( $cm^{-1}$ ) = 3285, 2952, 1729, 1679, 1544, 1506,

1451, 1434, 1356, 1278, 1188, 1164, 1153, 1079, 962, 866, 830, 753, 729, 690, 646, 596, 550, 486. HRMS (ESI) calcd for  $C_{24}H_{25}NaNO_4$   $[M+Na]^+$ : 414.1681. Found: 414.1676.

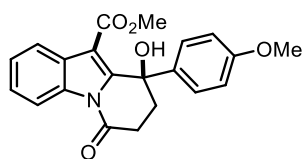

**2j**, yellow solid, 54.1 mg, 74% yield, m.p. = 166.1-167.9 °C.  $^1H$  NMR (400 MHz,  $CDCl_3$ )  $\delta$  8.64-8.61 (m, 1H), 8.13-8.10 (m, 1H), 7.47-7.40 (m, 2H), 7.20-7.13 (m, 2H), 6.84-6.80 (m, 2H), 3.91 (s, 3H), 3.77 (s, 3H), 2.84-2.33 (m, 4H).  $^{13}C$  NMR (100 MHz,  $CDCl_3$ )  $\delta$  169.6, 167.3, 159.5, 151.7, 135.9, 134.3, 126.9, 126.8, 126.2, 125.4, 122.0, 116.8, 113.9, 110.0, 72.9, 55.3, 52.6, 37.3, 30.8. IR (thin film):  $\nu_{max}$  ( $cm^{-1}$ ) = 3285, 2952, 1731, 1679, 1584, 1544, 1451, 1435, 1356, 1164, 1153, 1079, 962, 866, 830, 797, 550, 485, 414. HRMS (ESI) calcd for  $C_{21}H_{19}NaNO_5$   $[M+Na]^+$ : 388.1161. Found: 388.1155.

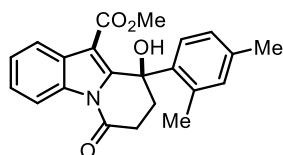

**2k**, blue solid, 58.2 mg, 80% yield, m.p. = 158.9-160.1 °C. The NMR spectra appear as a mixture of rotamers.  $^1H$  NMR (400 MHz,  $CDCl_3$ )  $\delta$  8.63-8.59 (m, 1H), 8.13-8.08 (m, 1H), 7.47-7.38 (m, 2H), 7.07-6.76 (m, 3H), 6.39-5.50 (m, 1H), 3.85 and 3.79 (s, 3H), 2.89-2.39 (m, 7H), 2.26 (s, 3H).  $^{13}C$  NMR (100 MHz,  $CDCl_3$ )  $\delta$  169.7, 137.7, 134.4, 134.1, 127.0, 126.9, 126.2, 126.1, 125.4, 121.9, 116.9, 116.6, 52.5, 34.8, 34.2, 31.0, 29.9, 21.2, 20.9. IR (thin film):  $\nu_{max}$  ( $cm^{-1}$ ) = 3286, 2952, 1728, 1678, 1544, 1451, 1306, 1278, 1166, 1152, 1115, 966, 909, 754, 728, 647, 555, 480. HRMS (ESI) calcd for  $C_{22}H_{21}NaNO_4$   $[M+Na]^+$ : 386.1368. Found: 386.1364.

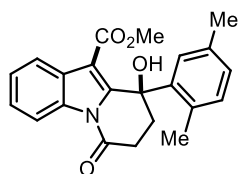

**2l**, blue solid, 60.3 mg, 83% yield, m.p. = 159.6-160.7 °C. The NMR spectra appear as a mixture of rotamers.  $^1H$  NMR (400 MHz,  $CDCl_3$ )  $\delta$  8.64-8.61 (m, 1H), 8.16-8.07 (m, 1H), 7.48-7.40 (m, 2H), 7.25-6.93 (m, 3H), 6.29 and 5.51 (s, 1H), 3.83 and 3.79 (s, 3H), 2.92-2.43 (m, 7H), 2.14-2.06 (m, 3H).  $^{13}C$  NMR (100 MHz,  $CDCl_3$ )  $\delta$  169.7, 134.8, 134.1, 132.6, 128.8, 127.4, 126.9, 126.2, 125.4, 121.9, 116.9, 52.4, 31.0, 21.2.

IR (thin film):  $\nu_{\text{max}}$  ( $\text{cm}^{-1}$ ) = 3260, 2950, 1738, 1673, 1534, 1438, 1356, 1309, 1193, 1164, 1148, 1116, 1086, 971, 796, 753, 662, 563, 477, 458. HRMS (ESI) calcd for  $\text{C}_{22}\text{H}_{21}\text{NaNO}_4$   $[\text{M}+\text{Na}]^+$ : 386.1368. Found: 386.1364.

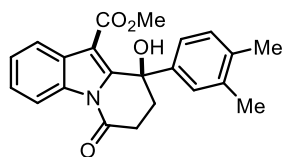

**2m**, yellow solid, 58.9 mg, 81% yield, m.p. = 158.9-160.5 °C.  $^1\text{H}$  NMR (400 MHz,  $\text{CDCl}_3$ )  $\delta$  8.65-8.62 (m, 1H), 8.13-8.11 (m, 1H), 7.48-7.40 (m, 2H), 7.20 (s, 1H), 7.08-7.01 (m, 2H), 6.84-6.82 (m, 1H), 3.90 (s, 3H), 2.82-2.34 (m, 4H), 2.22 (s, 6H).  $^{13}\text{C}$  NMR (100 MHz,  $\text{CDCl}_3$ )  $\delta$  169.7, 167.4, 151.9, 141.3, 137.0, 136.8, 134.3, 129.6, 126.83, 126.75, 126.1, 125.4, 123.1, 122.0, 116.8, 109.9, 73.1, 52.6, 37.3, 30.9, 20.2, 19.6. IR (thin film):  $\nu_{\text{max}}$  ( $\text{cm}^{-1}$ ) = 3286, 3054, 2952, 1731, 1679, 1545, 1451, 1306, 1278, 1164, 1153, 1079, 962, 830, 753, 646, 550, 485. HRMS (ESI) calcd for  $\text{C}_{22}\text{H}_{21}\text{NaNO}_4$   $[\text{M}+\text{Na}]^+$ : 386.1368. Found: 386.1362.

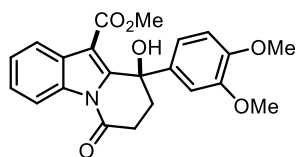

**2n**, yellow solid, 41.6 mg, 52% yield, m.p. = 168.7-169.5 °C.  $^1\text{H}$  NMR (400 MHz,  $\text{CDCl}_3$ )  $\delta$  8.64-8.62 (m, 1H), 8.13-8.11 (m, 1H), 7.48-7.41 (m, 2H), 7.31 (s, 1H), 7.19 (d,  $J$  = 2.0 Hz, 1H), 6.64 (d,  $J$  = 8.4 Hz, 1H), 6.32-6.29 (m, 1H), 3.93 (s, 3H), 3.90 (s, 3H), 3.83 (s, 3H), 2.85-2.36 (m, 4H).  $^{13}\text{C}$  NMR (100 MHz,  $\text{CDCl}_3$ )  $\delta$  169.5, 167.4, 151.5, 149.6, 149.1, 136.4, 134.3, 126.7, 126.2, 125.4, 122.0, 118.0, 116.8, 110.0, 108.7, 73.2, 56.1, 55.9, 52.6, 37.2, 30.9. IR (thin film):  $\nu_{\text{max}}$  ( $\text{cm}^{-1}$ ) = 3306, 2951, 1733, 1672, 1542, 1303, 1280, 1256, 1167, 1151, 1089, 1025, 966, 795, 754, 641. HRMS (ESI) calcd for  $\text{C}_{22}\text{H}_{21}\text{NaNO}_6$   $[\text{M}+\text{Na}]^+$ : 418.1267. Found: 418.1261.

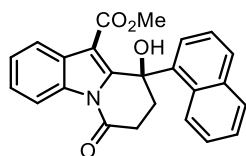

**2o**, blue solid, 61.7 mg, 80% yield, m.p. = 165.1-166.7 °C. The NMR spectra appear as a mixture of rotamers.  $^1\text{H}$  NMR (400 MHz,  $\text{CDCl}_3$ )  $\delta$  8.69-8.67 (m, 1H), 8.16-8.14 (m, 1H), 7.88-7.81 (m, 2H), 7.69-7.61 (m, 2H), 7.52-7.41 (m, 5H), 3.86 (s, 3H), 2.85-2.46 (m, 4H).  $^{13}\text{C}$  NMR (100 MHz,  $\text{CDCl}_3$ )  $\delta$  169.6, 167.4, 151.5, 141.4, 134.4, 133.2, 132.8, 128.9, 128.4, 127.7, 126.9, 126.5, 126.3, 125.5, 124.6, 123.6, 122.1, 116.9,



110.2, 73.4, 52.6, 37.1, 30.8. IR (thin film):  $\nu_{\text{max}}$  ( $\text{cm}^{-1}$ ) = 3285, 2953, 1731, 1679, 1545, 1451, 1435, 1329, 1164, 1153, 1079, 962, 830, 753, 596, 550, 506. HRMS (ESI) calcd for  $\text{C}_{24}\text{H}_{19}\text{NaNO}_4$   $[\text{M}+\text{Na}]^+$ : 408.1212. Found: 408.1208.

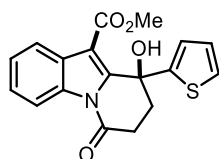

**2p**, yellow solid, 56.2 mg, 82% yield, m.p. = 158.4-159.6 °C.  $^1\text{H}$  NMR (400 MHz,  $\text{CDCl}_3$ )  $\delta$  8.62-8.59 (m, 1H), 8.13-8.11 (m, 1H), 7.82 (s, 1H), 7.47-7.29 (m, 3H), 6.84-6.82 (m, 1H), 6.54-6.52 (m, 1H), 3.97 (s, 3H), 2.90-2.49 (m, 4H).  $^{13}\text{C}$  NMR (100 MHz,  $\text{CDCl}_3$ )  $\delta$  169.1, 167.5, 150.2, 148.3, 134.3, 126.5, 126.4, 126.1, 125.5, 125.2, 122.1, 116.8, 110.1, 71.2, 52.8, 37.6, 31.0. IR (thin film):  $\nu_{\text{max}}$  ( $\text{cm}^{-1}$ ) = 3286, 2952, 1731, 1679, 1545, 1451, 1279, 1165, 1080, 964, 830, 754, 596, 551, 487. HRMS (ESI) calcd for  $\text{C}_{18}\text{H}_{15}\text{NaNO}_4\text{S}$   $[\text{M}+\text{Na}]^+$ : 364.0619. Found: 364.0611.

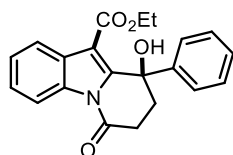

**2q**, blue solid, 64.0 mg, 87% yield, m.p. = 153.5-154.2 °C.  $^1\text{H}$  NMR (400 MHz,  $\text{CDCl}_3$ )  $\delta$  8.64-8.62 (m, 1H), 8.14-8.12 (m, 1H), 7.48-7.40 (m, 2H), 7.32-7.29 (m, 3H), 7.24-7.22 (m, 2H), 4.40-4.25 (m, 2H), 2.85-2.35 (m, 4H), 1.38 (t,  $J = 7.2$  Hz, 3H).  $^{13}\text{C}$  NMR (100 MHz,  $\text{CDCl}_3$ )  $\delta$  169.5, 166.8, 151.3, 144.2, 134.3, 128.5, 128.2, 126.9, 126.2, 125.6, 125.4, 122.0, 116.8, 110.3, 73.1, 61.8, 37.2, 30.8, 14.2. IR (thin film):  $\nu_{\text{max}}$  ( $\text{cm}^{-1}$ ) = 3286, 2952, 1731, 1679, 1544, 1451, 1279, 1165, 1079, 962, 830, 753, 551, 457. HRMS (ESI) calcd for  $\text{C}_{21}\text{H}_{19}\text{NaNO}_4$   $[\text{M}+\text{Na}]^+$ : 372.1212. Found: 372.1208.

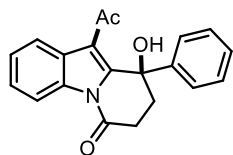

**2r**, yellow solid, 52.3 mg, 82% yield, m.p. = 143.6-144.5 °C.  $^1\text{H}$  NMR (400 MHz,  $\text{CDCl}_3$ )  $\delta$  8.71-8.69 (m, 1H), 7.92-7.89 (m, 1H), 7.51-7.44 (m, 2H), 7.31-7.25 (m, 3H), 7.24-7.15 (m, 2H), 2.91-2.85 (m, 1H), 2.70-2.53 (m, 5H), 2.39-2.33 (m, 1H).  $^{13}\text{C}$  NMR (100 MHz,  $\text{CDCl}_3$ )  $\delta$  198.4, 169.9, 150.8, 144.2, 134.6, 128.4, 128.1, 126.8, 126.1, 125.5, 125.4, 120.5, 118.7, 117.5, 72.9, 37.4, 32.1, 30.8. IR (thin film):  $\nu_{\text{max}}$  ( $\text{cm}^{-1}$ ) = 3262, 2950, 1724, 1673, 1533, 1446, 1307, 1278, 1166, 1149, 1115, 970, 754, 563, 478. HRMS (ESI) calcd for  $\text{C}_{20}\text{H}_{17}\text{NaNO}_3$   $[\text{M}+\text{Na}]^+$ : 342.1106. Found: 342.1101.

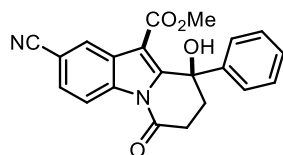

**2s**, yellow solid, 54.8 mg, 76% yield, m.p. = 171.6-172.3 °C. <sup>1</sup>H NMR (400 MHz, CDCl<sub>3</sub>) δ 8.76-8.73 (m, 1H), 8.48-8.47 (m, 1H), 7.73-7.70 (m, 1H), 7.34-7.32 (m, 2H), 7.21-7.19 (m, 2H), 7.06 (s, 1H), 3.94 (s, 3H), 2.90-2.69 (m, 2H), 2.59-2.39 (m, 2H). <sup>13</sup>C NMR (100 MHz, CDCl<sub>3</sub>) δ 169.4, 166.3, 153.7, 143.4, 136.0, 129.3, 128.8, 128.7, 127.2, 127.0, 125.5, 119.4, 117.8, 109.7, 109.2, 73.3, 53.6, 53.0, 37.1, 30.7. IR (thin film): ν<sub>max</sub> (cm<sup>-1</sup>) = 3286, 2951, 1731, 1680, 1546, 1450, 1305, 1278, 1164, 1080, 965, 830, 754, 552, 487. HRMS (ESI) calcd for C<sub>21</sub>H<sub>16</sub>NaN<sub>2</sub>O<sub>4</sub> [M+Na]<sup>+</sup>: 383.1008. Found: 383.1005.

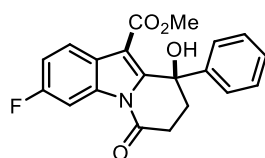

**2t**, blue solid, 54.4 mg, 77% yield, m.p. = 160.1-161.0 °C. <sup>1</sup>H NMR (400 MHz, CDCl<sub>3</sub>) δ 8.37-8.34 (m, 1H), 8.06-8.02 (m, 1H), 7.32-7.29 (m, 2H), 7.23-7.11 (m, 4H), 3.87 (s, 3H), 2.85-2.35 (m, 4H). <sup>13</sup>C NMR (100 MHz, CDCl<sub>3</sub>) δ 169.4, 166.9, 161.6 (d, *J* = 242.0 Hz), 151.7 (d, *J* = 3.0 Hz), 144.0, 134.3 (d, *J* = 13.0 Hz), 128.6, 128.4, 125.6, 123.0 (d, *J* = 9.0 Hz), 113.7 (d, *J* = 23.0 Hz), 109.8, 104.1 (d, *J* = 28.0 Hz), 73.1, 52.6, 37.2, 30.7. <sup>19</sup>F NMR (375 MHz, CDCl<sub>3</sub>) δ -114.63 to -114.70 (m). IR (thin film): ν<sub>max</sub> (cm<sup>-1</sup>) = 3261, 2961, 1724, 1681, 1551, 1484, 1426, 1290, 1190, 1163, 1111, 1070, 966, 857, 763, 697, 555, 526, 440. HRMS (ESI) calcd for C<sub>20</sub>H<sub>16</sub>NaFNO<sub>4</sub> [M+Na]<sup>+</sup>: 376.0961. Found: 376.0958.

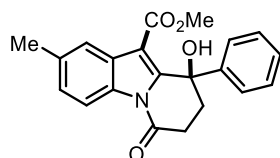

**2u**, blue solid, 63.0 mg, 90% yield, m.p. = 171.3-172.2 °C. <sup>1</sup>H NMR (400 MHz, CDCl<sub>3</sub>) δ 8.49 (d, *J* = 8.4 Hz, 1H), 7.88 (s, 1H), 7.33-7.26 (m, 4H), 7.24-7.20 (m, 2H), 3.88 (s, 3H), 2.84-2.34 (m, 7H). <sup>13</sup>C NMR (100 MHz, CDCl<sub>3</sub>) δ 169.4, 167.4, 151.4, 144.2, 135.2, 132.5, 128.5, 128.3, 127.5, 126.9, 125.6, 121.8, 116.4, 109.8, 73.2, 52.5, 37.3, 30.7, 21.8. IR (thin film): ν<sub>max</sub> (cm<sup>-1</sup>) = 3285, 3055, 2952, 1731, 1679, 1544, 1451, 1356, 1279, 1164, 1153, 1116, 1079, 1042, 962, 866, 830, 798, 753, 729, 550, 486. HRMS (ESI) calcd for C<sub>21</sub>H<sub>19</sub>NaNO<sub>4</sub> [M+Na]<sup>+</sup>: 372.1212. Found: 372.1205.

## 5. General procedure for photocatalytic intramolecular dearomatization of indole derivatives with ketones

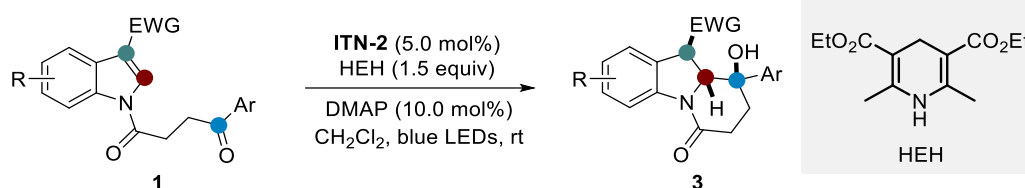

To a flame-dried sealed tube were added **ITN-2** (5.20 mg, 5.0 mol%), **1** (0.20 mmol, 1.0 equiv), **HEH** (0.30 mmol, 1.5 equiv), **DMAP** (2.40 mg, 10.0 mol%) and CH<sub>2</sub>Cl<sub>2</sub> (2.0 mL, 0.1M). The reaction mixture was degassed via freeze-pump-thaw for 3 cycles. After the reaction mixture was thoroughly degassed, the vial was sealed and positioned approximately 2~3 cm from 30 W blue LEDs. Then the reaction mixture was stirred at room temperature for the indicated time (monitored by TLC) under nitrogen atmosphere. Afterwards, the reaction mixture was concentrated by rotary evaporation. Ratios of diastereoisomers were determined by crude <sup>1</sup>H NMR analysis. Then the residue was purified by silica gel column chromatography (PE/EtOAc = 3/1) to afford the desired products **3**. The analytical data of the product **3a-3u** were summarized below.

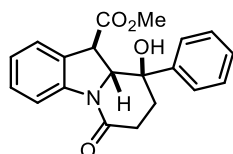

**3a**, white solid, 61.1 mg, 90% yield, m.p. = 134.0-135.1 °C, >20:1 dr. <sup>1</sup>H NMR (400 MHz, CDCl<sub>3</sub>) δ 8.24 (d, *J* = 8.0 Hz, 1H), 7.36-7.28 (m, 6H), 7.26-7.23 (m, 1H), 7.08-7.04 (m, 1H), 4.91 (d, *J* = 9.6 Hz, 1H), 4.14 (d, *J* = 9.6 Hz, 1H), 3.81 (s, 3H), 3.75 (s, 1H), 2.87-2.80 (m, 1H), 2.54-2.32 (m, 3H). <sup>13</sup>C NMR (100 MHz, CDCl<sub>3</sub>) δ 172.7, 169.6, 143.0, 141.7, 129.3, 128.8, 127.2, 126.1, 125.7, 125.3, 124.4, 116.9, 74.4, 69.8, 53.3, 48.6, 38.6, 31.8. IR (thin film): ν<sub>max</sub> (cm<sup>-1</sup>) = 3282, 2954, 1744, 1645, 1595, 1541, 1485, 1463, 1424, 1265, 1251, 1231, 1183, 1157, 1108, 1090, 1067, 1029, 1007, 971, 938, 902, 884, 857, 843, 831, 769, 756, 740, 716, 690, 634. HRMS (ESI) calcd for C<sub>20</sub>H<sub>20</sub>NO<sub>4</sub> [M+H]<sup>+</sup>: 338.1392. Found: 338.1384.

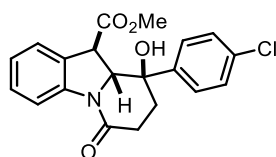

**3b**, yellow oil, 66.4 mg, 90% yield, 18:1 dr.  $^1\text{H}$  NMR (400 MHz,  $\text{CDCl}_3$ )  $\delta$  8.19 (d,  $J$  = 8.4 Hz, 1H), 7.33-7.27 (m, 4H), 7.24-7.22 (m, 2H), 7.08-7.04 (m, 1H), 4.93 (d,  $J$  = 8.8 Hz, 1H), 4.17 (s, 1H), 4.06 (d,  $J$  = 8.8 Hz, 1H), 3.79 (s, 3H), 2.89-2.80 (m, 1H), 2.53-2.28 (m, 3H).  $^{13}\text{C}$  NMR (100 MHz,  $\text{CDCl}_3$ )  $\delta$  172.6, 169.6, 141.6, 141.5, 133.8, 129.3, 128.9, 127.3, 125.9, 125.3, 124.6, 116.8, 74.2, 69.5, 53.3, 48.5, 38.4, 31.7. IR (thin film):  $\nu_{\text{max}}$  ( $\text{cm}^{-1}$ ) = 3366, 2953, 1737, 1636, 1594, 1483, 1462, 1433, 1399, 1306, 1271, 1228, 1198, 1177, 1094, 1077, 1043, 1012, 967, 933, 908, 831, 754, 736, 699. HRMS (ESI) calcd for  $\text{C}_{20}\text{H}_{19}\text{ClNO}_4$   $[\text{M}+\text{H}]^+$ : 372.1003. Found: 372.0997.

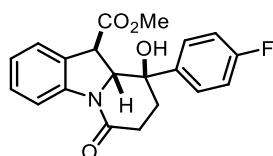

**3c**, white solid, 67.1 mg, 95% yield, m.p. = 144.9-145.7  $^{\circ}\text{C}$ , >20:1 dr.  $^1\text{H}$  NMR (400 MHz,  $\text{CDCl}_3$ )  $\delta$  8.20 (d,  $J$  = 8.0 Hz, 1H), 7.34-7.27 (m, 4H), 7.08-7.04 (m, 1H), 6.97-6.92 (m, 2H), 4.93 (d,  $J$  = 9.2 Hz, 1H), 4.09 (d,  $J$  = 8.8 Hz, 1H), 4.05 (s, 1H), 3.80 (s, 3H), 2.88-2.80 (m, 1H), 2.52-2.29 (m, 3H).  $^{13}\text{C}$  NMR (100 MHz,  $\text{CDCl}_3$ )  $\delta$  172.5, 169.5, 162.1 (d,  $J$  = 246.0 Hz), 141.5, 138.7 (d,  $J$  = 3.0 Hz), 129.3, 127.6 (d,  $J$  = 8.0 Hz), 126.1, 125.2, 124.6, 116.8, 115.6 (d,  $J$  = 21.0 Hz), 74.1, 69.5, 53.2, 48.4, 38.5, 31.7.  $^{19}\text{F}$  NMR (375 MHz,  $\text{CDCl}_3$ )  $\delta$  -114.31 to -114.38 (m). IR (thin film):  $\nu_{\text{max}}$  ( $\text{cm}^{-1}$ ) = 3469, 2955, 1714, 1686, 1661, 1598, 1507, 1483, 1463, 1442, 1398, 1314, 1277, 1218, 1199, 1180, 1161, 1114, 1073, 1041, 1024, 1007, 967, 940, 908, 841, 816, 753, 731, 687, 637. HRMS (ESI) calcd for  $\text{C}_{20}\text{H}_{19}\text{FNO}_4$   $[\text{M}+\text{H}]^+$ : 356.1298. Found: 356.1289.

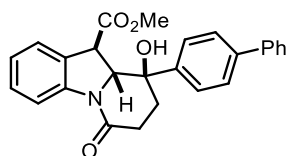

**3d**, white solid, 72.5 mg, 88% yield, m.p. = 105.1-106.7  $^{\circ}\text{C}$ , >20:1 dr.  $^1\text{H}$  NMR (400 MHz,  $\text{CDCl}_3$ )  $\delta$  8.25 (d,  $J$  = 8.0 Hz, 1H), 7.61-7.48 (m, 4H), 7.42-7.38 (m, 4H), 7.35-7.29 (m, 3H), 7.08-7.04 (m, 1H), 4.95 (d,  $J$  = 9.2 Hz, 1H), 4.21 (d,  $J$  = 9.6 Hz, 1H), 3.95 (s, 1H), 3.80 (s, 3H), 2.89-2.80 (m, 1H), 2.57-2.34 (m, 3H).  $^{13}\text{C}$  NMR (100 MHz,  $\text{CDCl}_3$ )  $\delta$  172.7, 169.6, 141.9, 141.7, 140.5, 140.2, 129.3, 128.9, 127.6, 127.4, 127.0, 126.2, 126.1, 125.3, 124.5, 116.9, 74.3, 69.8, 53.3, 48.7, 38.5, 31.7. IR (thin film):  $\nu_{\text{max}}$  ( $\text{cm}^{-1}$ ) = 3367, 2953, 1739, 1640, 1594, 1482, 1462, 1433, 1399, 1302, 1267, 1231, 1197, 1166, 1075, 1006, 968, 933, 908, 845, 756, 735, 696. HRMS (ESI) calcd for  $\text{C}_{26}\text{H}_{24}\text{NO}_4$   $[\text{M}+\text{H}]^+$ : 414.1705. Found: 414.1699.

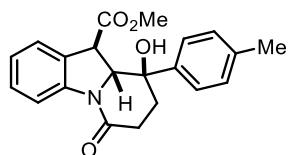

**3e**, yellow oil, 68.5 mg, 98% yield, >20:1 dr.  $^1\text{H}$  NMR (400 MHz,  $\text{CDCl}_3$ )  $\delta$  8.21 (d,  $J = 8.0$  Hz, 1H), 7.32-7.20 (m, 4H), 7.07-7.03 (m, 3H), 4.92 (d,  $J = 9.2$  Hz, 1H), 4.15 (d,  $J = 9.2$  Hz, 1H), 3.92 (s, 1H), 3.78 (s, 3H), 2.85-2.76 (m, 1H), 2.51-2.30 (m, 3H), 2.26 (s, 3H).  $^{13}\text{C}$  NMR (100 MHz,  $\text{CDCl}_3$ )  $\delta$  172.7, 169.6, 141.7, 139.9, 137.6, 129.5, 129.2, 126.2, 125.6, 125.2, 124.4, 116.9, 74.3, 69.8, 53.2, 48.6, 38.5, 31.7, 21.0. IR (thin film):  $\nu_{\text{max}}$  ( $\text{cm}^{-1}$ ) = 3368, 2951, 1739, 1640, 1594, 1513, 1482, 1462, 1433, 1401, 1303, 1272, 1231, 1195, 1165, 1076, 1043, 1020, 1007, 968, 908, 842, 819, 755, 728, 646, 617. HRMS (ESI) calcd for  $\text{C}_{21}\text{H}_{22}\text{NO}_4$   $[\text{M}+\text{H}]^+$ : 352.1549. Found: 352.1540.

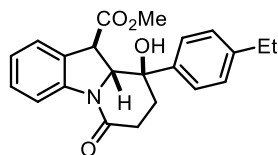

**3f**, yellow oil, 71.8 mg, 98% yield, >20:1 dr.  $^1\text{H}$  NMR (400 MHz,  $\text{CDCl}_3$ )  $\delta$  8.23 (d,  $J = 8.4$  Hz, 1H), 7.33-7.23 (m, 4H), 7.10-7.04 (m, 3H), 4.92 (d,  $J = 9.2$  Hz, 1H), 4.19 (d,  $J = 9.6$  Hz, 1H), 3.85 (s, 1H), 3.79 (s, 3H), 2.84-2.75 (m, 1H), 2.57 (q,  $J = 7.6$  Hz, 2H), 2.50-2.29 (m, 3H), 1.17 (t,  $J = 7.6$  Hz, 3H).  $^{13}\text{C}$  NMR (100 MHz,  $\text{CDCl}_3$ )  $\delta$  172.7, 169.6, 143.8, 141.7, 140.0, 129.2, 128.3, 126.3, 125.7, 125.2, 124.4, 116.9, 74.2, 69.8, 53.2, 48.6, 38.5, 31.7, 28.4, 15.4. IR (thin film):  $\nu_{\text{max}}$  ( $\text{cm}^{-1}$ ) = 3367, 2962, 1740, 1640, 1594, 1511, 1482, 1462, 1433, 1401, 1304, 1273, 1231, 1196, 1177, 1165, 1079, 1045, 1019, 1007, 968, 908, 833, 755, 729, 646, 618. HRMS (ESI) calcd for  $\text{C}_{22}\text{H}_{24}\text{NO}_4$   $[\text{M}+\text{H}]^+$ : 366.1705. Found: 366.1692.

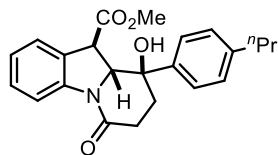

**3g**, yellow oil, 54.3 mg, 75% yield, >20:1 dr.  $^1\text{H}$  NMR (400 MHz,  $\text{CDCl}_3$ )  $\delta$  8.23 (d,  $J = 8.0$  Hz, 1H), 7.33-7.28 (m, 2H), 7.23 (d,  $J = 8.4$  Hz, 2H), 7.08-7.04 (m, 3H), 4.91 (d,  $J = 9.2$  Hz, 1H), 4.19 (d,  $J = 9.2$  Hz, 1H), 3.79 (s, 3H), 3.77 (s, 1H), 2.84-2.75 (m, 1H), 2.50 (t,  $J = 7.2$  Hz, 2H), 2.44-2.29 (m, 3H), 1.61-1.52 (m, 2H), 0.88 (t,  $J = 7.2$  Hz, 3H).  $^{13}\text{C}$  NMR (100 MHz,  $\text{CDCl}_3$ )  $\delta$  172.7, 169.5, 142.3, 141.7, 139.9, 129.2, 128.9, 126.3, 125.6, 125.2, 124.4, 116.9, 74.2, 69.8, 53.2, 48.6, 38.5, 37.5, 31.7, 24.4, 13.9.

IR (thin film):  $\nu_{\text{max}}$  ( $\text{cm}^{-1}$ ) = 3369, 2955, 2871, 1740, 1644, 1595, 1510, 1482, 1462, 1434, 1401, 1304, 1273, 1231, 1197, 1166, 1076, 1018, 968, 908, 844, 807, 755, 729, 646. HRMS (ESI) calcd for  $\text{C}_{23}\text{H}_{26}\text{NO}_4$   $[\text{M}+\text{H}]^+$ : 380.1862. Found: 380.1850.

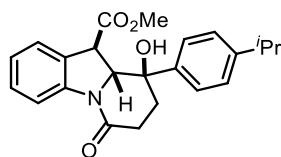

**3h**, yellow oil, 61.6 mg, 82% yield, > 20:1 dr.  $^1\text{H}$  NMR (400 MHz,  $\text{CDCl}_3$ )  $\delta$  8.24 (d,  $J = 8.0$  Hz, 1H), 7.34-7.28 (m, 2H), 7.25 (d,  $J = 8.4$  Hz, 2H), 7.13-7.04 (m, 3H), 4.92 (d,  $J = 9.6$  Hz, 1H), 4.22 (d,  $J = 9.2$  Hz, 1H), 3.80 (s, 1H), 3.79 (s, 3H), 2.86-2.74 (m, 2H), 2.49-2.28 (m, 3H), 1.18 (d,  $J = 6.8$  Hz, 6H).  $^{13}\text{C}$  NMR (100 MHz,  $\text{CDCl}_3$ )  $\delta$  172.7, 169.5, 148.4, 141.7, 139.9, 129.2, 126.8, 126.3, 125.7, 125.2, 124.4, 117.0, 74.1, 69.9, 53.2, 48.6, 38.5, 33.7, 31.6, 23.92, 23.88. IR (thin film):  $\nu_{\text{max}}$  ( $\text{cm}^{-1}$ ) = 3368, 2957, 2871, 1741, 1640, 1594, 1510, 1482, 1462, 1433, 1401, 1301, 1272, 1231, 1197, 1165, 1077, 1017, 968, 934, 908, 832, 754, 717. HRMS (ESI) calcd for  $\text{C}_{23}\text{H}_{26}\text{NO}_4$   $[\text{M}+\text{H}]^+$ : 380.1862. Found: 380.1847.

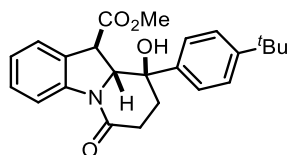

**3i**, white solid, 61.9 mg, 79% yield, m.p. = 180.1-180.7  $^{\circ}\text{C}$ , > 20:1 dr.  $^1\text{H}$  NMR (400 MHz,  $\text{CDCl}_3$ )  $\delta$  8.24 (d,  $J = 8.0$  Hz, 1H), 7.33-7.24 (m, 6H), 7.08-7.04 (m, 1H), 4.95 (d,  $J = 9.6$  Hz, 1H), 4.24 (d,  $J = 9.2$  Hz, 1H), 3.78 (s, 3H), 2.81-2.73 (m, 1H), 2.45-2.29 (m, 3H), 1.25 (s, 9H).  $^{13}\text{C}$  NMR (100 MHz,  $\text{CDCl}_3$ )  $\delta$  172.6, 169.4, 150.7, 141.8, 139.4, 129.2, 126.5, 125.7, 125.4, 125.1, 124.4, 117.0, 74.0, 69.9, 53.1, 48.6, 38.4, 34.5, 31.6, 31.3. IR (thin film):  $\nu_{\text{max}}$  ( $\text{cm}^{-1}$ ) = 3507, 2954, 2868, 1718, 1659, 1599, 1512, 1481, 1463, 1429, 1397, 1375, 1363, 1312, 1283, 1255, 1212, 1198, 1163, 1150, 1112, 1081, 1042, 1025, 1015, 967, 940, 912, 847, 829, 810, 771, 754, 723, 698, 614. HRMS (ESI) calcd for  $\text{C}_{24}\text{H}_{28}\text{NO}_4$   $[\text{M}+\text{H}]^+$ : 394.2018. Found: 394.2006.

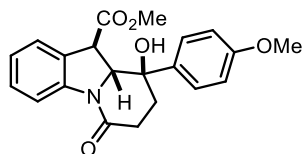

**3j**, yellow oil, 60.2 mg, 85% yield, > 20:1 dr.  $^1\text{H}$  NMR (400 MHz,  $\text{CDCl}_3$ )  $\delta$  8.20 (d,  $J = 8.0$  Hz, 1H), 7.31-7.23 (m, 4H), 7.06-7.02 (m, 1H), 6.78-6.76 (m, 2H), 4.92 (d,  $J = 8.8$  Hz, 1H), 4.16 (d,  $J = 8.8$  Hz, 1H), 3.88 (s, 1H), 3.78 (s, 3H), 3.72 (s, 3H), 2.84-

2.77 (m, 1H), 2.50-2.29 (m, 3H).  $^{13}\text{C}$  NMR (100 MHz,  $\text{CDCl}_3$ )  $\delta$  172.5, 169.5, 158.9, 141.6, 134.7, 129.1, 126.9, 126.3, 125.0, 124.3, 116.8, 114.0, 74.0, 69.8, 55.2, 53.1, 48.5, 38.4, 31.7. IR (thin film):  $\nu_{\text{max}}$  ( $\text{cm}^{-1}$ ) = 3369, 2953, 1739, 1640, 1610, 1594, 1511, 1482, 1462, 1433, 1401, 1249, 1178, 1075, 1028, 967, 932, 907, 834, 806, 756, 734, 701. HRMS (ESI) calcd for  $\text{C}_{21}\text{H}_{22}\text{NO}_5$   $[\text{M}+\text{H}]^+$ : 368.1498. Found: 368.1486.

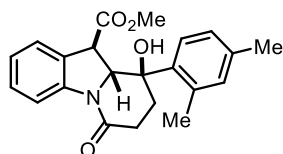

**3k**, yellow solid, 55.1 mg, 76% yield, m.p. = 140.8-142.3 °C, > 20:1 dr.  $^1\text{H}$  NMR (400 MHz,  $\text{CDCl}_3$ )  $\delta$  8.27 (d,  $J$  = 8.4 Hz, 1H), 7.42-7.32 (m, 2H), 7.15-7.11 (m, 1H), 7.02-6.78 (m, 3H), 4.94 (d,  $J$  = 10.0 Hz, 1H), 4.49 (d,  $J$  = 8.8 Hz, 1H), 3.79 (s, 3H), 3.44 (s, 1H), 2.75-2.66 (m, 1H), 2.58-2.52 (m, 1H), 2.46 (s, 3H), 2.33-2.26 (m, 2H), 2.24 (s, 3H).  $^{13}\text{C}$  NMR (100 MHz,  $\text{CDCl}_3$ )  $\delta$  172.9, 168.7, 141.6, 137.5, 134.7, 129.4, 126.5, 126.2, 126.0, 125.2, 124.6, 117.5, 75.5, 71.3, 53.2, 48.6, 35.7, 31.6, 22.2, 20.8. IR (thin film):  $\nu_{\text{max}}$  ( $\text{cm}^{-1}$ ) = 3131, 3096, 2947, 1717, 1703, 1663, 1603, 1585, 1561, 1514, 1477, 1446, 1433, 1390, 1370, 1342, 1315, 1300, 1251, 1235, 1219, 1200, 1179, 1153, 1111, 1064, 1045, 975, 955, 928, 900, 878, 855, 830, 815, 804, 776, 762, 745, 724, 663, 649, 617. HRMS (ESI) calcd for  $\text{C}_{22}\text{H}_{24}\text{NO}_4$   $[\text{M}+\text{H}]^+$ : 366.1705. Found: 366.1691.

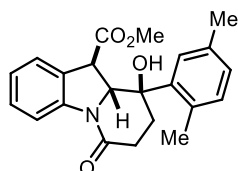

**3l**, yellow solid, 70.1 mg, 96% yield, m.p. = 140.8-142.3 °C, > 20:1 dr.  $^1\text{H}$  NMR (400 MHz,  $\text{CDCl}_3$ )  $\delta$  8.26 (d,  $J$  = 8.4 Hz, 1H), 7.43-7.32 (m, 2H), 7.13-6.94 (m, 4H), 4.94 (d,  $J$  = 10.0 Hz, 1H), 4.41-4.40 (m, 1H), 3.78 (s, 3H), 3.60 (s, 1H), 2.78-2.71 (m, 1H), 2.59-2.51 (m, 1H), 2.38 (s, 3H), 2.32-2.24 (m, 2H), 2.06 (s, 3H).  $^{13}\text{C}$  NMR (100 MHz,  $\text{CDCl}_3$ )  $\delta$  172.9, 169.3, 141.5, 135.2, 133.6, 129.4, 128.6, 127.0, 126.0, 125.3, 124.5, 117.3, 76.0, 71.1, 53.6, 53.3, 48.8, 35.7, 31.8, 21.7, 21.3. IR (thin film):  $\nu_{\text{max}}$  ( $\text{cm}^{-1}$ ) = 3219, 2955, 2224, 1716, 1668, 1594, 1532, 1483, 1437, 1398, 1367, 1281, 1254, 1222, 1205, 1107, 1042, 1025, 920, 887, 866, 836, 806, 771, 755, 700, 628. HRMS (ESI) calcd for  $\text{C}_{22}\text{H}_{24}\text{NO}_4$   $[\text{M}+\text{H}]^+$ : 366.1705. Found: 366.1700.

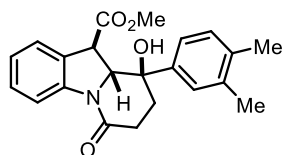

**3m**, white solid, 69.2 mg, 95% yield, m.p. = 147.6-149.3 °C, > 20:1 dr.  $^1\text{H}$  NMR (400 MHz,  $\text{CDCl}_3$ )  $\delta$  8.22 (d,  $J = 8.0$  Hz, 1H), 7.32-7.26 (m, 2H), 7.17 (s, 1H), 7.07-6.93 (m, 3H), 4.91 (d,  $J = 9.2$  Hz, 1H), 4.17 (d,  $J = 9.2$  Hz, 1H), 3.87 (s, 1H), 3.79 (s, 3H), 2.84-2.77 (m, 1H), 2.52-2.30 (m, 3H), 2.17 (s, 3H), 2.15 (s, 3H).  $^{13}\text{C}$  NMR (100 MHz,  $\text{CDCl}_3$ )  $\delta$  172.7, 169.7, 141.7, 140.3, 137.1, 136.2, 129.9, 129.2, 127.0, 126.3, 125.2, 124.3, 122.8, 116.8, 74.3, 69.8, 53.2, 48.6, 38.5, 31.8, 20.1, 19.4. IR (thin film):  $\nu_{\text{max}}$  ( $\text{cm}^{-1}$ ) = 3341, 2972, 1741, 1644, 1595, 1483, 1462, 1402, 1269, 1230, 1182, 1165, 1082, 1067, 1047, 1026, 969, 940, 868, 818, 758, 703. HRMS (ESI) calcd for  $\text{C}_{22}\text{H}_{24}\text{NO}_4$   $[\text{M}+\text{H}]^+$ : 366.1705. Found: 366.1692.

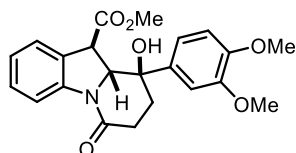

**3n**, yellow oil, 71.3 mg, 90% yield, > 20:1 dr.  $^1\text{H}$  NMR (400 MHz,  $\text{CDCl}_3$ )  $\delta$  8.21 (d,  $J = 7.6$  Hz, 1H), 7.33-7.26 (m, 2H), 7.07-7.03 (m, 1H), 6.84-6.71 (m, 3H), 4.94 (d,  $J = 8.4$  Hz, 1H), 4.16 (d,  $J = 8.4$  Hz, 1H), 3.97 (s, 1H), 3.80 (s, 3H), 3.79 (s, 3H), 3.61 (s, 3H), 2.88-2.79 (m, 1H), 2.54-2.31 (m, 3H).  $^{13}\text{C}$  NMR (100 MHz,  $\text{CDCl}_3$ )  $\delta$  172.5, 169.7, 148.9, 148.3, 141.7, 135.4, 129.2, 126.3, 125.2, 124.4, 117.7, 116.6, 110.8, 108.8, 74.3, 69.5, 55.8, 55.6, 53.1, 48.5, 38.4, 31.8. IR (thin film):  $\nu_{\text{max}}$  ( $\text{cm}^{-1}$ ) = 3263, 3000, 2937, 2838, 1746, 1647, 1594, 1518, 1484, 1460, 1422, 1326, 1240, 1222, 1199, 1168, 1137, 1105, 1083, 1059, 1048, 1025, 1007, 941, 913, 866, 852, 832, 813, 796, 767, 753, 729, 715, 696, 646. HRMS (ESI) calcd for  $\text{C}_{22}\text{H}_{24}\text{NO}_6$   $[\text{M}+\text{H}]^+$ : 398.1604. Found: 398.1590.

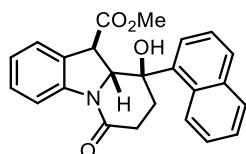

**3o**, white solid, 67.4 mg, 87% yield, m.p. = 108.5-110.2 °C, > 20:1 dr.  $^1\text{H}$  NMR (400 MHz,  $\text{CDCl}_3$ )  $\delta$  8.25 (d,  $J = 8.0$  Hz, 1H), 7.93 (s, 1H), 7.75-7.67 (m, 3H), 7.45-7.43 (m, 2H), 7.31-7.25 (m, 3H), 7.06-7.01 (m, 1H), 4.98 (d,  $J = 9.2$  Hz, 1H), 4.24 (s, 1H), 4.12 (d,  $J = 9.2$  Hz, 1H), 3.75 (s, 3H), 2.92-2.84 (m, 1H), 2.59-2.45 (m, 3H).  $^{13}\text{C}$  NMR (100 MHz,  $\text{CDCl}_3$ )  $\delta$  172.7, 170.1, 141.6, 140.8, 133.0, 132.6, 129.2, 128.8,



128.5, 127.5, 126.53, 126.48, 126.0, 125.4, 124.9, 124.4, 123.4, 116.7, 74.9, 69.8, 53.3, 48.8, 38.4, 32.0. IR (thin film):  $\nu_{\text{max}}$  ( $\text{cm}^{-1}$ ) = 3343, 2938, 1737, 1643, 1594, 1506, 1464, 1435, 1418, 1357, 1339, 1269, 1250, 1228, 1195, 1180, 1123, 1098, 1076, 1043, 1020, 1007, 991, 969, 940, 934, 909, 895, 866, 859, 846, 819, 798, 772, 762, 752, 714, 694, 648, 624. HRMS (ESI) calcd for  $\text{C}_{24}\text{H}_{22}\text{NO}_4$   $[\text{M}+\text{H}]^+$ : 388.1549. Found: 388.1536.

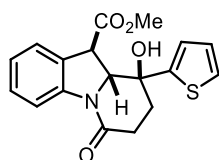

**3p**, yellow solid, 57.7 mg, 85% yield, m.p. = 167.8-170.2 °C, > 20:1 dr.  $^1\text{H}$  NMR (400 MHz,  $\text{CDCl}_3$ )  $\delta$  8.26 (d,  $J$  = 8.4 Hz, 1H), 7.36-7.28 (m, 2H), 7.21 (d,  $J$  = 5.2 Hz, 1H), 7.08 (t,  $J$  = 7.6 Hz, 1H), 6.90-6.88 (m, 1H), 6.81 (d,  $J$  = 3.6 Hz, 1H), 4.93 (d,  $J$  = 9.6 Hz, 1H), 4.32 (s, 1H), 4.29 (d,  $J$  = 9.6 Hz, 1H), 3.84 (s, 3H), 2.85-2.78 (m, 1H), 2.67-2.58 (m, 1H), 2.49-2.32 (m, 2H).  $^{13}\text{C}$  NMR (100 MHz,  $\text{CDCl}_3$ )  $\delta$  172.7, 168.4, 145.7, 142.0, 129.2, 127.5, 126.1, 125.3, 125.1, 124.6, 123.8, 117.2, 73.8, 69.5, 53.4, 48.6, 38.0, 31.1. IR (thin film):  $\nu_{\text{max}}$  ( $\text{cm}^{-1}$ ) = 3276, 3104, 2951, 1743, 1627, 1591, 1482, 1462, 1434, 1399, 1367, 1327, 1293, 1259, 1236, 1200, 1104, 1091, 1075, 1051, 1019, 1007, 961, 945, 930, 908, 852, 835, 809, 759, 722, 706, 696, 626. HRMS (ESI) calcd for  $\text{C}_{18}\text{H}_{18}\text{NO}_4\text{S}$   $[\text{M}+\text{H}]^+$ : 344.0957. Found: 344.0947.

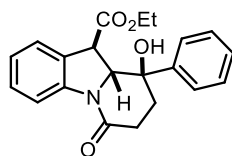

**3q**, yellow oil, 59.2 mg, 85% yield, > 20:1 dr.  $^1\text{H}$  NMR (400 MHz,  $\text{CDCl}_3$ )  $\delta$  8.23 (d,  $J$  = 8.0 Hz, 1H), 7.35-7.20 (m, 7H), 7.05 (t,  $J$  = 7.6 Hz, 1H), 4.93 (d,  $J$  = 9.6 Hz, 1H), 4.31-4.17 (m, 2H), 4.12 (d,  $J$  = 9.6 Hz, 1H), 4.04 (s, 1H), 2.86-2.78 (m, 1H), 2.52-2.31 (m, 3H), 1.30 (t,  $J$  = 7.2 Hz, 3H).  $^{13}\text{C}$  NMR (100 MHz,  $\text{CDCl}_3$ )  $\delta$  172.1, 169.7, 143.0, 141.6, 129.1, 128.7, 127.8, 126.3, 125.7, 125.1, 124.4, 116.8, 74.3, 69.6, 62.4, 48.6, 38.5, 31.7, 14.2. IR (thin film):  $\nu_{\text{max}}$  ( $\text{cm}^{-1}$ ) = 3368, 2956, 1735, 1640, 1594, 1482, 1462, 1402, 1302, 1271, 1229, 1182, 1158, 1093, 1066, 1026, 912, 888, 867, 754, 702. HRMS (ESI) calcd for  $\text{C}_{21}\text{H}_{21}\text{NO}_4\text{Na}$   $[\text{M}+\text{Na}]^+$ : 374.1368. Found: 374.1354.

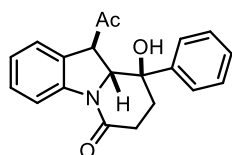

**3r**, yellow oil, 48.3 mg, 73% yield, > 20:1 dr. <sup>1</sup>H NMR (400 MHz, CDCl<sub>3</sub>) δ 8.21 (d, *J* = 8.0 Hz, 1H), 7.31-7.20 (m, 6H), 7.12 (d, *J* = 7.6 Hz, 1H), 7.03 (t, *J* = 7.6 Hz, 1H), 4.86 (d, *J* = 8.4 Hz, 1H), 4.14 (d, *J* = 8.4 Hz, 1H), 3.70 (s, 1H), 2.88-2.80 (m, 1H), 2.52-2.35 (m, 3H), 2.33 (s, 3H). <sup>13</sup>C NMR (100 MHz, CDCl<sub>3</sub>) δ 207.3, 169.6, 142.9, 142.2, 129.2, 128.8, 127.9, 126.9, 125.7, 124.5, 124.4, 117.1, 74.6, 69.2, 56.8, 38.5, 31.9, 29.6. IR (thin film): ν<sub>max</sub> (cm<sup>-1</sup>) = 3369, 2955, 1713, 1640, 1593, 1481, 1461, 1400, 1354, 1267, 1202, 1160, 1092, 1064, 1027, 1001, 934, 869, 840, 754, 731, 702. HRMS (ESI) calcd for C<sub>20</sub>H<sub>20</sub>NO<sub>3</sub> [M+H]<sup>+</sup>: 322.1443. Found: 322.1432.

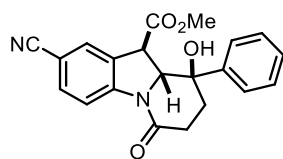

**3s**, white oil, 62.4 mg, 87% yield, 18:1 dr. <sup>1</sup>H NMR (400 MHz, CDCl<sub>3</sub>) δ 7.98-7.95 (m, 1H), 7.33-7.22 (m, 6H), 6.76-6.71 (m, 1H), 4.95 (d, *J* = 9.2 Hz, 1H), 4.06 (d, *J* = 8.8 Hz, 1H), 3.85 (s, 1H), 3.80 (s, 3H), 2.88-2.80 (m, 1H), 2.55-2.33 (m, 3H). <sup>13</sup>C NMR (100 MHz, CDCl<sub>3</sub>) δ 171.5, 170.6, 145.1, 142.8, 134.1, 129.4, 129.0, 128.2, 127.1, 125.5, 119.0, 116.8, 112.8, 107.3, 74.5, 69.9, 53.7, 48.1, 38.3, 32.0. IR (thin film): ν<sub>max</sub> (cm<sup>-1</sup>) = 3116, 2954, 2223, 1738, 1675, 1603, 1584, 1528, 1483, 1444, 1388, 1365, 1326, 1245, 1206, 1181, 1140, 1115, 1066, 1039, 920, 887, 776, 743, 703, 627. HRMS (ESI) calcd for C<sub>21</sub>H<sub>19</sub>N<sub>2</sub>O<sub>4</sub> [M+H]<sup>+</sup>: 363.1345. Found: 363.1339.

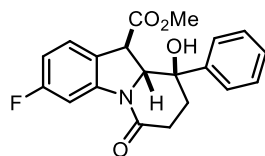

**3t**, white solid, 68.2 mg, 96% yield, m.p. = 108.5-110.2 °C, > 20:1 dr. <sup>1</sup>H NMR (400 MHz, CDCl<sub>3</sub>) δ 7.98-7.95 (m, 1H), 7.33-7.26 (m, 5H), 7.24-7.22 (m, 1H), 6.76-6.71 (m, 1H), 4.96 (d, *J* = 9.2 Hz, 1H), 4.06 (d, *J* = 9.2 Hz, 1H), 3.86 (s, 1H), 3.80 (s, 3H), 2.88-2.80 (m, 1H), 2.55-2.37 (m, 3H). <sup>13</sup>C NMR (100 MHz, CDCl<sub>3</sub>) δ 172.4, 169.9, 163.3 (d, *J* = 244.0 Hz), 142.9, 142.8 (d, *J* = 12.0 Hz), 128.8, 128.0, 126.1 (d, *J* = 10.0 Hz), 125.6, 121.6 (d, *J* = 3.0 Hz), 111.1 (d, *J* = 23.0 Hz), 104.8 (d, *J* = 29.0 Hz), 74.4, 70.4, 53.3, 47.9, 38.4, 31.7. <sup>19</sup>F NMR (375 MHz, CDCl<sub>3</sub>) δ -111.47 to -111.53 (m). IR (thin film): ν<sub>max</sub> (cm<sup>-1</sup>) = 3311, 2954, 1743, 1647, 1595, 1486, 1435, 1417, 1357, 1268, 1252, 1230, 1206, 1170, 1123, 1098, 1068, 1029, 1007, 969, 933, 909, 895, 880, 856, 846, 818, 797, 771, 752, 739, 703, 694, 670, 613. HRMS (ESI) calcd for C<sub>20</sub>H<sub>19</sub>FNO<sub>4</sub> [M+H]<sup>+</sup>: 356.1298. Found: 356.1286.

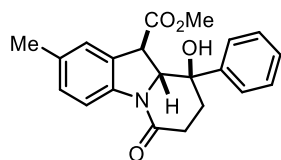

**3u**, white solid, 60.2 mg, 86% yield, m.p. = 160.1-162.4 °C, > 20:1 dr. <sup>1</sup>H NMR (400 MHz, CDCl<sub>3</sub>) δ 8.12 (d, *J* = 8.8 Hz, 1H), 7.37-7.28 (m, 4H), 7.26-7.23 (m, 1H), 7.12 (d, *J* = 6.4 Hz, 2H), 4.93 (d, *J* = 9.2 Hz, 1H), 4.15 (d, *J* = 9.2 Hz, 1H), 3.85 (s, 1H), 3.82 (s, 3H), 2.85-2.77 (m, 1H), 2.51-2.35 (m, 3H), 2.32 (s, 3H). <sup>13</sup>C NMR (100 MHz, CDCl<sub>3</sub>) δ 172.7, 169.2, 142.9, 139.4, 134.2, 129.8, 128.8, 127.8, 126.3, 125.7, 125.6, 116.6, 74.3, 69.9, 53.2, 48.5, 38.5, 31.6, 21.3. IR (thin film): ν<sub>max</sub> (cm<sup>-1</sup>) = 3237, 2952, 1733, 1632, 1608, 1589, 1489, 1435, 1399, 1346, 1302, 1274, 1245, 1194, 1174, 1151, 1116, 1086, 1071, 1030, 1006, 966, 929, 897, 833, 802, 767, 752, 701. HRMS (ESI) calcd for C<sub>21</sub>H<sub>21</sub>NaNO<sub>4</sub> [M+Na]<sup>+</sup>: 374.1368. Found: 374.1353.

#### 6. X-Ray crystal data of ITN-1, ITN-2, ITN-3, 2a and 3k

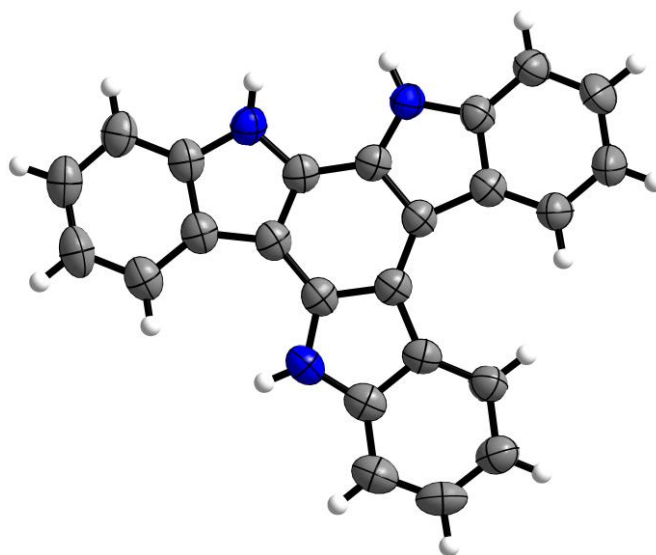

**Figure S22. X-Ray crystal structure of ITN-1 (The crystal was obtained by slow evaporation of the solution of DCM and PE) (CCDC: 2271792)**

**Table S2 Crystal data and structure refinement for ITN-1.**

|                     |                                                                 |
|---------------------|-----------------------------------------------------------------|
| Identification code | ITN-1                                                           |
| Empirical formula   | C <sub>26</sub> H <sub>18</sub> ClN <sub>3</sub> O <sub>2</sub> |
| Formula weight      | 439.88                                                          |
| Temperature/K       | 261 K                                                           |
| Crystal system      | Monoclinic                                                      |
| Space group         | C 2/c                                                           |
| a/Å                 | 30.8340(15)                                                     |

|                                             |                                                                      |
|---------------------------------------------|----------------------------------------------------------------------|
| b/Å                                         | 7.8320(2)                                                            |
| c/Å                                         | 22.5177(11)                                                          |
| $\alpha$ /°                                 | 90                                                                   |
| $\beta$ /°                                  | 132.054(8)                                                           |
| $\gamma$ /°                                 | 90                                                                   |
| Volume/Å <sup>3</sup>                       | 4037.7(5)                                                            |
| Z                                           | 8                                                                    |
| $\rho$ calc/cm <sup>3</sup>                 | 1.447                                                                |
| $\mu$ /mm <sup>-1</sup>                     | 1.925                                                                |
| F(000)                                      | 1824                                                                 |
| Crystal size/mm <sup>3</sup>                | 0.32 x 0.25 x 0.13                                                   |
| Radiation                                   | CuK $\alpha$ ( $\lambda$ = 1.54184)                                  |
| 2 $\Theta$ range for data collection/°      | 5.686 to 153.072                                                     |
| Index ranges                                | -38 $\leq$ h $\leq$ 37, -9 $\leq$ k $\leq$ 9, -28 $\leq$ l $\leq$ 28 |
| Reflections collected                       | 21560                                                                |
| Independent reflections                     | 4262 [R(int) = 0.09]                                                 |
| Data/restraints/parameters                  | 4262 / 0 / 289                                                       |
| Goodness-of-fit on F <sup>2</sup>           | 1.075                                                                |
| Final R indexes [I $\geq$ 2 $\sigma$ (I)]   | R1 = 0.0873, wR2 = 0.2537                                            |
| Final R indexes [all data]                  | R1 = 0.0965, wR2 = 0.2661                                            |
| Largest diff. peak/hole / e Å <sup>-3</sup> | 0.581 / -0.691                                                       |

**Table S3 Fractional Atomic Coordinates ( $\times 10^4$ ) and Equivalent Isotropic Displacement Parameters ( $\text{Å}^2 \times 10^3$ ) for ITN-1.  $U_{\text{eq}}$  is defined as 1/3 of the trace of the orthogonalised  $U_{\text{ij}}$  tensor.**

| Atom  | x       | y       | z       | U(eq) |
|-------|---------|---------|---------|-------|
| C(1)  | 3208(1) | 4252(3) | 5737(1) | 43(1) |
| C(2)  | 2957(1) | 3743(3) | 4961(1) | 45(1) |
| C(3)  | 2394(1) | 4268(3) | 4283(1) | 45(1) |
| C(4)  | 2074(1) | 5256(3) | 4399(2) | 45(1) |
| C(5)  | 2316(1) | 5789(3) | 5177(1) | 43(1) |
| C(6)  | 2896(1) | 5297(3) | 5852(1) | 43(1) |
| C(7)  | 3819(1) | 4715(3) | 7047(2) | 47(1) |
| C(8)  | 3298(1) | 5615(3) | 6706(1) | 45(1) |
| C(9)  | 3286(1) | 6564(4) | 7216(2) | 56(1) |
| C(10) | 3766(1) | 6585(5) | 8026(2) | 68(1) |

|       |         |         |         |        |
|-------|---------|---------|---------|--------|
| C(11) | 4274(1) | 5676(5) | 8349(2) | 66(1)  |
| C(12) | 4309(1) | 4741(4) | 7864(2) | 58(1)  |
| C(13) | 2788(1) | 2613(3) | 3907(2) | 50(1)  |
| C(14) | 2823(1) | 1688(4) | 3420(2) | 58(1)  |
| C(15) | 2346(2) | 1731(4) | 2604(2) | 65(1)  |
| C(16) | 1851(2) | 2696(4) | 2288(2) | 66(1)  |
| C(17) | 1812(1) | 3610(4) | 2774(2) | 58(1)  |
| C(18) | 2282(1) | 3561(3) | 3601(2) | 49(1)  |
| C(19) | 1373(1) | 6744(3) | 4214(2) | 50(1)  |
| C(20) | 852(1)  | 7600(4) | 3867(2) | 63(1)  |
| C(21) | 822(1)  | 8435(4) | 4373(2) | 66(1)  |
| C(22) | 1281(1) | 8401(4) | 5201(2) | 64(1)  |
| C(23) | 1796(1) | 7553(4) | 5539(2) | 55(1)  |
| C(24) | 1855(1) | 6732(3) | 5050(2) | 45(1)  |
| C(25) | 4816(1) | 1053(4) | 6446(2) | 56(1)  |
| C(26) | 4981(2) | 629(6)  | 5961(2) | 76(1)  |
| N(1)  | 3747(1) | 3879(3) | 6449(1) | 47(1)  |
| N(2)  | 3191(1) | 2754(3) | 4738(1) | 49(1)  |
| N(3)  | 1515(1) | 5824(3) | 3842(1) | 52(1)  |
| Cl(1) | 4544(1) | 1683(3) | 5039(1) | 134(1) |
| O(5)  | 4384(1) | 1863(3) | 6174(1) | 65(1)  |
| O(4)  | 5187(1) | 453(3)  | 7154(1) | 68(1)  |

**Table S4 Anisotropic Displacement Parameters ( $\text{\AA}^2 \times 10^3$ ) for ITN-1. The Anisotropic displacement factor exponent takes the form:  $2\pi^2[h^2a^{*2}U_{11}+2hka^*b^*U_{12}+\dots]$ .**

| Atom | U11   | U22   | U33   | U23   | U13   | U12   |
|------|-------|-------|-------|-------|-------|-------|
| C(1) | 48(1) | 33(1) | 45(1) | 1(1)  | 30(1) | -1(1) |
| C(2) | 53(1) | 34(1) | 48(1) | 0(1)  | 34(1) | -4(1) |
| C(3) | 51(1) | 36(1) | 44(1) | -2(1) | 31(1) | -6(1) |
| C(4) | 50(1) | 34(1) | 45(1) | 2(1)  | 30(1) | -4(1) |
| C(5) | 48(1) | 33(1) | 48(1) | 0(1)  | 32(1) | -3(1) |
| C(6) | 48(1) | 33(1) | 45(1) | -1(1) | 30(1) | -3(1) |

|       |        |        |       |        |       |        |
|-------|--------|--------|-------|--------|-------|--------|
| C(7)  | 49(1)  | 41(1)  | 48(1) | -6(1)  | 31(1) | -5(1)  |
| C(8)  | 48(1)  | 37(1)  | 47(1) | -2(1)  | 30(1) | -4(1)  |
| C(9)  | 50(1)  | 61(2)  | 51(1) | -9(1)  | 31(1) | 1(1)   |
| C(10) | 58(2)  | 84(2)  | 53(2) | -21(2) | 34(1) | -2(2)  |
| C(11) | 50(1)  | 81(2)  | 47(1) | -14(1) | 23(1) | -4(1)  |
| C(12) | 48(1)  | 61(2)  | 52(1) | -7(1)  | 28(1) | 1(1)   |
| C(13) | 61(1)  | 42(1)  | 47(1) | -2(1)  | 36(1) | -10(1) |
| C(14) | 73(2)  | 52(2)  | 61(2) | -3(1)  | 49(2) | -6(1)  |
| C(15) | 88(2)  | 62(2)  | 56(2) | -11(1) | 53(2) | -13(2) |
| C(16) | 83(2)  | 65(2)  | 46(1) | -6(1)  | 42(1) | -16(2) |
| C(17) | 63(2)  | 53(2)  | 48(1) | -1(1)  | 34(1) | -7(1)  |
| C(18) | 60(1)  | 38(1)  | 48(1) | -2(1)  | 37(1) | -8(1)  |
| C(19) | 49(1)  | 45(1)  | 52(1) | 5(1)   | 31(1) | -4(1)  |
| C(20) | 48(1)  | 64(2)  | 58(2) | 11(1)  | 28(1) | 0(1)   |
| C(21) | 51(1)  | 65(2)  | 78(2) | 15(2)  | 42(2) | 13(1)  |
| C(22) | 61(2)  | 64(2)  | 71(2) | 10(1)  | 47(2) | 12(1)  |
| C(23) | 53(1)  | 55(2)  | 53(1) | 5(1)   | 34(1) | 6(1)   |
| C(24) | 49(1)  | 35(1)  | 48(1) | 5(1)   | 31(1) | -1(1)  |
| C(25) | 65(2)  | 49(2)  | 57(1) | 1(1)   | 42(1) | 1(1)   |
| C(26) | 82(2)  | 92(2)  | 61(2) | 11(2)  | 50(2) | 21(2)  |
| N(1)  | 48(1)  | 40(1)  | 49(1) | -4(1)  | 31(1) | 1(1)   |
| N(2)  | 56(1)  | 42(1)  | 48(1) | -1(1)  | 34(1) | 0(1)   |
| N(3)  | 49(1)  | 52(1)  | 43(1) | 1(1)   | 25(1) | -4(1)  |
| Cl(1) | 134(1) | 208(2) | 76(1) | 55(1)  | 77(1) | 70(1)  |
| O(5)  | 68(1)  | 66(1)  | 66(1) | 5(1)   | 47(1) | 13(1)  |
| O(4)  | 71(1)  | 78(2)  | 52(1) | 6(1)   | 39(1) | 10(1)  |

**Table S5 Bond Lengths for ITN-1.**

| <b>Bond</b> | <b>Angle/°</b> | <b>Bond</b> | <b>Angle/°</b> |
|-------------|----------------|-------------|----------------|
| C(1)-N(1)   | 1.359(3)       | C(15)-C(16) | 1.397(5)       |
| C(1)-C(6)   | 1.413(4)       | C(15)-H(15) | 0.9300         |
| C(1)-C(2)   | 1.414(3)       | C(16)-C(17) | 1.378(5)       |
| C(2)-N(2)   | 1.365(3)       | C(16)-H(16) | 0.9300         |

|             |          |              |          |
|-------------|----------|--------------|----------|
| C(2)-C(3)   | 1.402(4) | C(17)-C(18)  | 1.398(4) |
| C(3)-C(4)   | 1.410(4) | C(17)-H(17)  | 0.9300   |
| C(3)-C(18)  | 1.441(3) | C(19)-N(3)   | 1.379(4) |
| C(4)-N(3)   | 1.358(3) | C(19)-C(20)  | 1.400(4) |
| C(4)-C(5)   | 1.430(3) | C(19)-C(24)  | 1.415(3) |
| C(5)-C(6)   | 1.419(3) | C(20)-C(21)  | 1.371(5) |
| C(5)-C(24)  | 1.452(4) | C(20)-H(20)  | 0.9300   |
| C(6)-C(8)   | 1.450(3) | C(21)-C(22)  | 1.395(5) |
| C(7)-N(1)   | 1.375(3) | C(21)-H(21)  | 0.9300   |
| C(7)-C(12)  | 1.395(4) | C(22)-C(23)  | 1.385(4) |
| C(7)-C(8)   | 1.419(4) | C(22)-H(22)  | 0.9300   |
| C(8)-C(9)   | 1.389(4) | C(23)-C(24)  | 1.389(4) |
| C(9)-C(10)  | 1.379(4) | C(23)-H(23)  | 0.9300   |
| C(9)-H(9)   | 0.9300   | C(25)-O(5)   | 1.207(4) |
| C(10)-C(11) | 1.399(5) | C(25)-O(4)   | 1.277(4) |
| C(10)-H(10) | 0.9300   | C(25)-C(26)  | 1.517(4) |
| C(11)-C(12) | 1.379(4) | C(26)-Cl(1)  | 1.750(4) |
| C(11)-H(11) | 0.9300   | C(26)-H(26A) | 0.9700   |
| C(12)-H(12) | 0.9300   | C(26)-H(26B) | 0.9700   |
| C(13)-C(14) | 1.379(4) | N(1)-H(1)    | 0.8600   |
| C(13)-N(2)  | 1.393(3) | N(2)-H(2)    | 0.8600   |
| C(13)-C(18) | 1.420(4) | N(3)-H(3)    | 0.8600   |
| C(14)-C(15) | 1.386(4) | O(4)-H(4)    | 0.8200   |
| C(14)-H(14) | 0.9300   |              |          |

**Table S6 Bond Angles for ITN-1.**

| <b>Bond</b>    | <b>Angle/°</b> | <b>Bond</b>       | <b>Angle/°</b> |
|----------------|----------------|-------------------|----------------|
| N(1)-C(1)-C(6) | 110.7(2)       | C(17)-C(16)-H(16) | 119.2          |
| N(1)-C(1)-C(2) | 128.4(2)       | C(15)-C(16)-H(16) | 119.2          |
| C(6)-C(1)-C(2) | 120.9(2)       | C(16)-C(17)-C(18) | 118.6(3)       |
| N(2)-C(2)-C(3) | 109.9(2)       | C(16)-C(17)-H(17) | 120.7          |
| N(2)-C(2)-C(1) | 129.0(2)       | C(18)-C(17)-H(17) | 120.7          |
| C(3)-C(2)-C(1) | 121.1(2)       | C(17)-C(18)-C(13) | 118.9(2)       |

|                   |          |                     |          |
|-------------------|----------|---------------------|----------|
| C(2)-C(3)-C(4)    | 118.0(2) | C(17)-C(18)-C(3)    | 134.7(3) |
| C(2)-C(3)-C(18)   | 106.6(2) | C(13)-C(18)-C(3)    | 106.4(2) |
| C(4)-C(3)-C(18)   | 135.4(2) | N(3)-C(19)-C(20)    | 128.5(3) |
| N(3)-C(4)-C(3)    | 128.4(2) | N(3)-C(19)-C(24)    | 109.1(2) |
| N(3)-C(4)-C(5)    | 109.6(2) | C(20)-C(19)-C(24)   | 122.3(3) |
| C(3)-C(4)-C(5)    | 122.0(2) | C(21)-C(20)-C(19)   | 117.1(3) |
| C(6)-C(5)-C(4)    | 118.9(2) | C(21)-C(20)-H(20)   | 121.4    |
| C(6)-C(5)-C(24)   | 135.6(2) | C(19)-C(20)-H(20)   | 121.4    |
| C(4)-C(5)-C(24)   | 105.5(2) | C(20)-C(21)-C(22)   | 121.9(3) |
| C(1)-C(6)-C(5)    | 119.0(2) | C(20)-C(21)-H(21)   | 119.0    |
| C(1)-C(6)-C(8)    | 105.1(2) | C(22)-C(21)-H(21)   | 119.0    |
| C(5)-C(6)-C(8)    | 135.9(2) | C(23)-C(22)-C(21)   | 120.5(3) |
| N(1)-C(7)-C(12)   | 128.3(2) | C(23)-C(22)-H(22)   | 119.7    |
| N(1)-C(7)-C(8)    | 109.0(2) | C(21)-C(22)-H(22)   | 119.7    |
| C(12)-C(7)-C(8)   | 122.7(2) | C(22)-C(23)-C(24)   | 119.7(3) |
| C(9)-C(8)-C(7)    | 117.7(2) | C(22)-C(23)-H(23)   | 120.1    |
| C(9)-C(8)-C(6)    | 135.7(2) | C(24)-C(23)-H(23)   | 120.1    |
| C(7)-C(8)-C(6)    | 106.5(2) | C(23)-C(24)-C(19)   | 118.3(2) |
| C(10)-C(9)-C(8)   | 120.1(3) | C(23)-C(24)-C(5)    | 135.3(2) |
| C(10)-C(9)-H(9)   | 120.0    | C(19)-C(24)-C(5)    | 106.4(2) |
| C(8)-C(9)-H(9)    | 120.0    | O(5)-C(25)-O(4)     | 126.0(3) |
| C(9)-C(10)-C(11)  | 121.1(3) | O(5)-C(25)-C(26)    | 122.6(3) |
| C(9)-C(10)-H(10)  | 119.4    | O(4)-C(25)-C(26)    | 111.5(3) |
| C(11)-C(10)-H(10) | 119.4    | C(25)-C(26)-Cl(1)   | 112.8(2) |
| C(12)-C(11)-C(10) | 120.9(3) | C(25)-C(26)-H(26A)  | 109.0    |
| C(12)-C(11)-H(11) | 119.6    | Cl(1)-C(26)-H(26A)  | 109.0    |
| C(10)-C(11)-H(11) | 119.6    | C(25)-C(26)-H(26B)  | 109.0    |
| C(11)-C(12)-C(7)  | 117.5(3) | Cl(1)-C(26)-H(26B)  | 109.0    |
| C(11)-C(12)-H(12) | 121.3    | H(26A)-C(26)-H(26B) | 107.8    |
| C(7)-C(12)-H(12)  | 121.3    | C(1)-N(1)-C(7)      | 108.7(2) |
| C(14)-C(13)-N(2)  | 129.3(3) | C(1)-N(1)-H(1)      | 125.7    |
| C(14)-C(13)-C(18) | 122.3(3) | C(7)-N(1)-H(1)      | 125.7    |
| N(2)-C(13)-C(18)  | 108.3(2) | C(2)-N(2)-C(13)     | 108.8(2) |



|                   |          |                 |          |
|-------------------|----------|-----------------|----------|
| C(13)-C(14)-C(15) | 117.5(3) | C(2)-N(2)-H(2)  | 125.6    |
| C(13)-C(14)-H(14) | 121.2    | C(13)-N(2)-H(2) | 125.6    |
| C(15)-C(14)-H(14) | 121.2    | C(4)-N(3)-C(19) | 109.4(2) |
| C(14)-C(15)-C(16) | 121.0(3) | C(4)-N(3)-H(3)  | 125.3    |
| C(14)-C(15)-H(15) | 119.5    | C(19)-N(3)-H(3) | 125.3    |
| C(16)-C(15)-H(15) | 119.5    | C(25)-O(4)-H(4) | 109.5    |
| C(17)-C(16)-C(15) | 121.6(3) |                 |          |

**Table S7 Hydrogen Atom Coordinates ( $\text{\AA} \times 10^4$ ) and Isotropic Displacement Parameters ( $\text{\AA}^2 \times 10^3$ ) for ITN-1.**

| Atom   | x    | y    | z    | U(eq) |
|--------|------|------|------|-------|
| H(9)   | 2954 | 7186 | 7011 | 67    |
| H(10)  | 3753 | 7214 | 8363 | 81    |
| H(11)  | 4591 | 5703 | 8897 | 80    |
| H(12)  | 4648 | 4151 | 8074 | 70    |
| H(14)  | 3155 | 1058 | 3631 | 70    |
| H(15)  | 2355 | 1108 | 2261 | 78    |
| H(16)  | 1540 | 2722 | 1737 | 80    |
| H(17)  | 1480 | 4247 | 2556 | 69    |
| H(20)  | 540  | 7603 | 3316 | 75    |
| H(21)  | 485  | 9042 | 4158 | 79    |
| H(22)  | 1242 | 8952 | 5528 | 76    |
| H(23)  | 2100 | 7534 | 6092 | 65    |
| H(26A) | 4946 | -593 | 5870 | 92    |
| H(26B) | 5386 | 941  | 6268 | 92    |
| H(1)   | 4001 | 3229 | 6514 | 57    |
| H(2)   | 3532 | 2292 | 5057 | 59    |
| H(3)   | 1285 | 5639 | 3336 | 62    |
| H(4)   | 5339 | 1240 | 7477 | 103   |

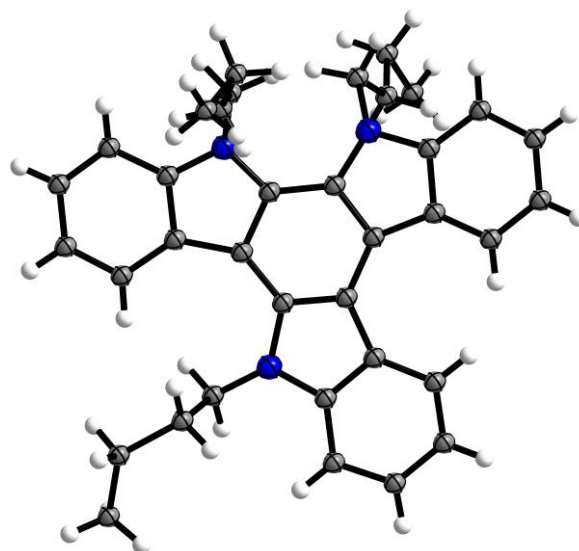

**Figure S23. X-Ray crystal structure of ITN-2 (The crystal was obtained by slow evaporation of the solution of DCM and PE) (CCDC: 2271797)**

**Table S8 Crystal data and structure refinement for ITN-2.**

|                                               |                                                              |
|-----------------------------------------------|--------------------------------------------------------------|
| Identification code                           | <b>ITN-2</b>                                                 |
| Empirical formula                             | $C_{36}H_{29}N_3$                                            |
| Formula weight                                | 513.70                                                       |
| Temperature/K                                 | 300 K                                                        |
| Crystal system                                | Monoclinic                                                   |
| Space group                                   | $C 2/c$                                                      |
| $a/\text{\AA}$                                | 12.4937(2)                                                   |
| $b/\text{\AA}$                                | 24.0509(4)                                                   |
| $c/\text{\AA}$                                | 10.0306(2)                                                   |
| $\alpha/^\circ$                               | 90                                                           |
| $\beta/^\circ$                                | 104.017(2)                                                   |
| $\gamma/^\circ$                               | 90                                                           |
| Volume/ $\text{\AA}^3$                        | 2924.29(9)                                                   |
| Z                                             | 4                                                            |
| $\rho_{\text{calc}}/\text{cm}^3$              | 1.167                                                        |
| $\mu/\text{mm}^{-1}$                          | 0.517                                                        |
| F(000)                                        | 1104                                                         |
| Crystal size/ $\text{mm}^3$                   | 0.30 x 0.25 x 0.13                                           |
| Radiation                                     | $\text{CuK}\alpha$ ( $\lambda = 1.54184$ )                   |
| $2\Theta$ range for data collection/ $^\circ$ | 7.30 to 156.08                                               |
| Index ranges                                  | $-15 \leq h \leq 15, -30 \leq k \leq 29, -12 \leq l \leq 10$ |
| Reflections collected                         | 39094                                                        |

|                                             |                           |
|---------------------------------------------|---------------------------|
| Independent reflections                     | 6232 [R(int) = 0.0369]    |
| Data/restraints/parameters                  | 6232 / 78 / 451           |
| Goodness-of-fit on F2                       | 1.059                     |
| Final R indexes [ $I \geq 2\sigma(I)$ ]     | R1 = 0.0741, wR2 = 0.2096 |
| Final R indexes [all data]                  | R1 = 0.0869, wR2 = 0.2211 |
| Largest diff. peak/hole / e Å <sup>-3</sup> | 0.385 / -0.358            |

**Table S9 Fractional Atomic Coordinates ( $\times 10^4$ ) and Equivalent Isotropic Displacement Parameters ( $\text{\AA}^2 \times 10^3$ ) for ITN-2.  $U_{\text{eq}}$  is defined as 1/3 of the trace of the orthogonalised  $U_{ij}$  tensor.**

| Atom   | x        | y       | z       | U(eq)  |
|--------|----------|---------|---------|--------|
| C(29') | 6838(2)  | 7782(1) | 3680(3) | 88(1)  |
| C(25') | 9130(2)  | 7091(2) | 3926(3) | 94(1)  |
| C(1)   | 7915(2)  | 6746(1) | 5418(2) | 61(1)  |
| C(2)   | 8163(2)  | 6386(1) | 6540(2) | 63(1)  |
| C(3)   | 7325(2)  | 6027(1) | 6777(2) | 62(1)  |
| C(4)   | 6242(2)  | 6073(1) | 5951(2) | 63(1)  |
| C(5)   | 5955(2)  | 6480(1) | 4891(2) | 61(1)  |
| C(6)   | 6817(2)  | 6822(1) | 4679(2) | 59(1)  |
| C(7)   | 9702(2)  | 6875(1) | 6401(3) | 71(1)  |
| C(8)   | 10782(2) | 7070(1) | 6751(3) | 88(1)  |
| C(9)   | 11458(2) | 6897(2) | 7972(4) | 104(1) |
| C(10)  | 11073(3) | 6542(2) | 8829(4) | 108(1) |
| C(11)  | 10012(2) | 6337(1) | 8480(3) | 92(1)  |
| C(12)  | 9304(2)  | 6492(1) | 7224(2) | 71(1)  |
| C(13)  | 7331(2)  | 5570(1) | 7714(2) | 71(1)  |
| C(14)  | 8135(3)  | 5299(1) | 8708(3) | 93(1)  |
| C(15)  | 7828(3)  | 4870(1) | 9445(4) | 109(1) |
| C(16)  | 6754(3)  | 4695(1) | 9196(4) | 111(1) |
| C(17)  | 5947(3)  | 4936(1) | 8189(3) | 102(1) |
| C(18)  | 6250(2)  | 5375(1) | 7450(3) | 77(1)  |
| C(19)  | 5286(2)  | 7122(1) | 3202(2) | 66(1)  |
| C(20)  | 4555(2)  | 7409(1) | 2154(3) | 81(1)  |
| C(21)  | 3484(3)  | 7234(2) | 1797(3) | 99(1)  |

|        |           |          |          |         |
|--------|-----------|----------|----------|---------|
| C(22)  | 3137(3)   | 6798(2)  | 2478(4)  | 110(1)  |
| C(23)  | 3854(2)   | 6517(1)  | 3515(3)  | 92(1)   |
| C(24)  | 4964(2)   | 6672(1)  | 3907(2)  | 66(1)   |
| C(25)  | 9130(2)   | 7091(2)  | 3926(3)  | 94(1)   |
| C(26)  | 9840(5)   | 6721(3)  | 3370(7)  | 97(2)   |
| C(27)  | 9390(7)   | 6136(3)  | 3281(9)  | 106(2)  |
| C(28)  | 9984(17)  | 5745(4)  | 2519(19) | 135(4)  |
| C(26') | 9471(9)   | 6458(4)  | 3673(9)  | 114(3)  |
| C(27') | 9894(7)   | 6389(4)  | 2422(8)  | 123(3)  |
| C(28') | 10240(20) | 5816(5)  | 2121(19) | 150(6)  |
| C(29)  | 6838(2)   | 7782(1)  | 3680(3)  | 88(1)   |
| C(30)  | 6198(7)   | 8186(4)  | 4426(11) | 118(3)  |
| C(31)  | 6752(7)   | 8613(4)  | 5325(10) | 128(3)  |
| C(32)  | 6195(14)  | 8899(7)  | 6287(18) | 111(4)  |
| C(30') | 6883(8)   | 8123(3)  | 4899(7)  | 157(5)  |
| C(31') | 5883(9)   | 8414(5)  | 4912(11) | 180(5)  |
| C(32') | 6022(17)  | 8911(7)  | 5900(20) | 157(8)  |
| C(33)  | 4469(3)   | 5497(2)  | 5745(4)  | 85(1)   |
| C(34)  | 3653(4)   | 5775(3)  | 6426(6)  | 122(2)  |
| C(35)  | 2450(5)   | 5634(4)  | 5804(10) | 151(3)  |
| C(36)  | 1980(10)  | 5151(6)  | 6225(13) | 235(6)  |
| C(33') | 4381(8)   | 5835(4)  | 6524(10) | 83(3)   |
| C(34') | 3581(7)   | 5385(4)  | 5908(12) | 90(3)   |
| C(35') | 2437(9)   | 5446(7)  | 6160(20) | 222(17) |
| C(36') | 1607(14)  | 5035(11) | 5450(20) | 310(30) |
| N(1)   | 8866(2)   | 7030(1)  | 5275(2)  | 69(1)   |
| N(2)   | 6406(2)   | 7220(1)  | 3675(2)  | 64(1)   |
| N(3)   | 5588(2)   | 5674(1)  | 6384(2)  | 77(1)   |

**Table S10 Anisotropic Displacement Parameters ( $\text{\AA}^2 \times 10^3$ ) for ITN-2. The Anisotropic displacement factor exponent takes the form:  $-2\pi^2[h^2a^{*2}U_{11}+2hka^*b^*U_{12}+\dots]$ .**

| Atom | U11 | U22 | U33 | U23 | U13 | U12 |
|------|-----|-----|-----|-----|-----|-----|
|------|-----|-----|-----|-----|-----|-----|

---

|        |         |         |         |        |        |        |
|--------|---------|---------|---------|--------|--------|--------|
| C(29') | 83(2)   | 71(2)   | 104(2)  | 13(1)  | 13(2)  | -1(1)  |
| C(25') | 70(2)   | 135(3)  | 80(2)   | 6(2)   | 24(1)  | -2(2)  |
| C(1)   | 57(1)   | 63(1)   | 60(1)   | 0(1)   | 10(1)  | 2(1)   |
| C(2)   | 63(1)   | 61(1)   | 61(1)   | 1(1)   | 9(1)   | 4(1)   |
| C(3)   | 67(1)   | 59(1)   | 57(1)   | -1(1)  | 9(1)   | 2(1)   |
| C(4)   | 69(1)   | 61(1)   | 58(1)   | -5(1)  | 12(1)  | -7(1)  |
| C(5)   | 60(1)   | 63(1)   | 55(1)   | -4(1)  | 8(1)   | -1(1)  |
| C(6)   | 60(1)   | 62(1)   | 53(1)   | 1(1)   | 9(1)   | 3(1)   |
| C(7)   | 58(1)   | 76(1)   | 75(1)   | 3(1)   | 5(1)   | 2(1)   |
| C(8)   | 64(1)   | 95(2)   | 98(2)   | 7(2)   | 7(1)   | -6(1)  |
| C(9)   | 67(2)   | 116(2)  | 112(2)  | 10(2)  | -9(2)  | -10(2) |
| C(10)  | 86(2)   | 117(2)  | 98(2)   | 18(2)  | -25(2) | -7(2)  |
| C(11)  | 85(2)   | 95(2)   | 82(2)   | 18(2)  | -8(1)  | -6(1)  |
| C(12)  | 66(1)   | 72(1)   | 69(1)   | 4(1)   | 4(1)   | 4(1)   |
| C(13)  | 84(2)   | 60(1)   | 64(1)   | 2(1)   | 12(1)  | -1(1)  |
| C(14)  | 96(2)   | 77(2)   | 99(2)   | 24(1)  | 9(2)   | 5(1)   |
| C(15)  | 122(3)  | 86(2)   | 109(2)  | 35(2)  | 7(2)   | 2(2)   |
| C(16)  | 136(3)  | 85(2)   | 107(2)  | 34(2)  | 20(2)  | -13(2) |
| C(17)  | 112(2)  | 86(2)   | 101(2)  | 22(2)  | 13(2)  | -25(2) |
| C(18)  | 93(2)   | 65(1)   | 69(1)   | 2(1)   | 14(1)  | -11(1) |
| C(19)  | 62(1)   | 73(1)   | 58(1)   | -4(1)  | 6(1)   | 10(1)  |
| C(20)  | 76(2)   | 89(2)   | 73(2)   | 8(1)   | 8(1)   | 20(1)  |
| C(21)  | 73(2)   | 126(3)  | 88(2)   | 10(2)  | -3(1)  | 24(2)  |
| C(22)  | 65(2)   | 143(3)  | 107(2)  | 9(2)   | -7(2)  | -1(2)  |
| C(23)  | 65(1)   | 110(2)  | 92(2)   | 6(2)   | 1(1)   | -9(1)  |
| C(24)  | 61(1)   | 74(1)   | 60(1)   | -7(1)  | 8(1)   | 2(1)   |
| C(25)  | 70(2)   | 135(3)  | 80(2)   | 6(2)   | 24(1)  | -2(2)  |
| C(26)  | 88(3)   | 130(5)  | 84(4)   | 14(3)  | 42(3)  | -6(3)  |
| C(27)  | 106(4)  | 119(5)  | 100(5)  | 4(4)   | 38(4)  | 11(4)  |
| C(28)  | 143(9)  | 155(9)  | 115(10) | -29(6) | 45(7)  | 10(7)  |
| C(26') | 132(7)  | 130(9)  | 91(5)   | -3(5)  | 50(5)  | -5(7)  |
| C(27') | 121(6)  | 159(9)  | 100(5)  | 8(5)   | 48(5)  | 23(5)  |
| C(28') | 171(17) | 173(12) | 112(11) | -13(8) | 44(8)  | 43(10) |

---

|        |         |         |         |         |         |          |
|--------|---------|---------|---------|---------|---------|----------|
| C(29)  | 83(2)   | 71(2)   | 104(2)  | 13(1)   | 13(2)   | -1(1)    |
| C(30)  | 77(4)   | 107(5)  | 161(6)  | -51(5)  | 10(4)   | -10(4)   |
| C(31)  | 99(5)   | 153(7)  | 141(6)  | -64(5)  | 46(5)   | -14(5)   |
| C(32)  | 121(8)  | 114(9)  | 103(11) | 14(5)   | 38(6)   | 24(6)    |
| C(30') | 186(9)  | 70(4)   | 145(7)  | 10(4)   | -95(6)  | 11(4)    |
| C(31') | 215(13) | 198(12) | 170(9)  | -49(9)  | 129(10) | -47(10)  |
| C(32') | 240(19) | 151(12) | 101(9)  | -8(8)   | 82(11)  | 29(10)   |
| C(33)  | 87(3)   | 87(3)   | 75(2)   | -4(2)   | 9(2)    | -30(2)   |
| C(34)  | 90(3)   | 163(5)  | 112(4)  | 0(4)    | 26(3)   | -20(4)   |
| C(35)  | 98(4)   | 216(8)  | 142(5)  | 25(6)   | 37(4)   | -25(5)   |
| C(36)  | 217(10) | 297(14) | 179(10) | 60(10)  | 23(8)   | -123(10) |
| C(33') | 88(6)   | 82(6)   | 78(5)   | -9(4)   | 18(5)   | -18(5)   |
| C(34') | 73(6)   | 85(6)   | 112(7)  | 14(5)   | 23(5)   | -18(5)   |
| C(35') | 151(17) | 250(30) | 220(30) | 140(20) | -42(15) | -118(17) |
| C(36') | 610(80) | 170(20) | 129(18) | 18(15)  | 70(30)  | 90(30)   |
| N(1)   | 58(1)   | 77(1)   | 69(1)   | 10(1)   | 11(1)   | -1(1)    |
| N(2)   | 63(1)   | 66(1)   | 61(1)   | 6(1)    | 9(1)    | 6(1)     |
| N(3)   | 77(1)   | 76(1)   | 72(1)   | 5(1)    | 7(1)    | -18(1)   |

**Table S11 Bond Lengths for ITN-2.**

| <b>Bond</b>   | <b>Angle/°</b> | <b>Bond</b>   | <b>Angle/°</b> |
|---------------|----------------|---------------|----------------|
| C(29')-N(2)   | 1.456(3)       | C(27)-H(27B)  | 0.9700         |
| C(29')-C(30') | 1.462(7)       | C(28)-H(28A)  | 0.9600         |
| C(29')-H(29A) | 0.9700         | C(28)-H(28B)  | 0.9600         |
| C(29')-H(29B) | 0.9700         | C(28)-H(28C)  | 0.9600         |
| C(25')-N(1)   | 1.476(3)       | C(26')-C(27') | 1.485(8)       |
| C(25')-C(26') | 1.615(8)       | C(26')-H(26C) | 0.9700         |
| C(25')-H(25A) | 0.9700         | C(26')-H(26D) | 0.9700         |
| C(25')-H(25B) | 0.9700         | C(27')-C(28') | 1.498(9)       |
| C(1)-C(2)     | 1.394(3)       | C(27')-H(27C) | 0.9700         |
| C(1)-C(6)     | 1.405(3)       | C(27')-H(27D) | 0.9700         |
| C(1)-N(1)     | 1.407(3)       | C(28')-H(28D) | 0.9600         |
| C(2)-C(3)     | 1.421(3)       | C(28')-H(28E) | 0.9600         |

---

|             |          |               |           |
|-------------|----------|---------------|-----------|
| C(2)-C(12)  | 1.448(3) | C(28')-H(28F) | 0.9600    |
| C(3)-C(4)   | 1.409(3) | C(30)-C(31)   | 1.430(8)  |
| C(3)-C(13)  | 1.444(3) | C(30)-H(30A)  | 0.9700    |
| C(4)-N(3)   | 1.395(3) | C(30)-H(30B)  | 0.9700    |
| C(4)-C(5)   | 1.426(3) | C(31)-C(32)   | 1.488(9)  |
| C(5)-C(6)   | 1.411(3) | C(31)-H(31A)  | 0.9700    |
| C(5)-C(24)  | 1.458(3) | C(31)-H(31B)  | 0.9700    |
| C(6)-N(2)   | 1.395(3) | C(32)-H(32A)  | 0.9600    |
| C(7)-C(8)   | 1.390(3) | C(32)-H(32B)  | 0.9600    |
| C(7)-N(1)   | 1.391(3) | C(32)-H(32C)  | 0.9600    |
| C(7)-C(12)  | 1.405(4) | C(30')-C(31') | 1.434(9)  |
| C(8)-C(9)   | 1.373(4) | C(30')-H(30D) | 0.9700    |
| C(8)-H(8)   | 0.9300   | C(30')-H(30C) | 0.9700    |
| C(9)-C(10)  | 1.379(5) | C(31')-C(32') | 1.533(10) |
| C(9)-H(9)   | 0.9300   | C(31')-H(31C) | 0.9700    |
| C(10)-C(11) | 1.377(4) | C(31')-H(31D) | 0.9700    |
| C(10)-H(10) | 0.9300   | C(32')-H(32D) | 0.9600    |
| C(11)-C(12) | 1.403(3) | C(32')-H(32E) | 0.9600    |
| C(11)-H(11) | 0.9300   | C(32')-H(32F) | 0.9600    |
| C(13)-C(18) | 1.394(4) | C(33)-N(3)    | 1.453(4)  |
| C(13)-C(14) | 1.394(4) | C(33)-C(34)   | 1.514(7)  |
| C(14)-C(15) | 1.377(4) | C(33)-H(33A)  | 0.9700    |
| C(14)-H(14) | 0.9300   | C(33)-H(33B)  | 0.9700    |
| C(15)-C(16) | 1.369(5) | C(34)-C(35)   | 1.520(7)  |
| C(15)-H(15) | 0.9300   | C(34)-H(34A)  | 0.9700    |
| C(16)-C(17) | 1.370(5) | C(34)-H(34B)  | 0.9700    |
| C(16)-H(16) | 0.9300   | C(35)-C(36)   | 1.411(9)  |
| C(17)-C(18) | 1.394(4) | C(35)-H(35A)  | 0.9700    |
| C(17)-H(17) | 0.9300   | C(35)-H(35B)  | 0.9700    |
| C(18)-N(3)  | 1.385(3) | C(36)-H(36A)  | 0.9600    |
| C(19)-N(2)  | 1.384(3) | C(36)-H(36B)  | 0.9600    |
| C(19)-C(20) | 1.396(3) | C(36)-H(36C)  | 0.9600    |
| C(19)-C(24) | 1.405(3) | C(33')-C(34') | 1.502(9)  |

---

|              |          |               |           |
|--------------|----------|---------------|-----------|
| C(20)-C(21)  | 1.365(4) | C(33')-N(3)   | 1.595(10) |
| C(20)-H(20)  | 0.9300   | C(33')-H(33C) | 0.9700    |
| C(21)-C(22)  | 1.378(5) | C(33')-H(33D) | 0.9700    |
| C(21)-H(21)  | 0.9300   | C(34')-C(35') | 1.518(10) |
| C(22)-C(23)  | 1.375(4) | C(34')-H(34C) | 0.9700    |
| C(22)-H(22)  | 0.9300   | C(34')-H(34D) | 0.9700    |
| C(23)-C(24)  | 1.398(3) | C(35')-C(36') | 1.485(10) |
| C(23)-H(23)  | 0.9300   | C(35')-H(35C) | 0.9700    |
| C(26)-C(27)  | 1.512(8) | C(35')-H(35D) | 0.9700    |
| C(26)-H(26A) | 0.9700   | C(36')-H(36D) | 0.9600    |
| C(26)-H(26B) | 0.9700   | C(36')-H(36E) | 0.9600    |
| C(27)-C(28)  | 1.514(8) | C(36')-H(36F) | 0.9600    |
| C(27)-H(27A) | 0.9700   |               |           |

**Table S12 Bond Angles for ITN-2.**

| <b>Bond</b>          | <b>Angle/°</b> | <b>Bond</b>          | <b>Angle/°</b> |
|----------------------|----------------|----------------------|----------------|
| N(2)-C(29')-C(30')   | 117.6(4)       | C(27')-C(26')-H(26D) | 108.9          |
| N(2)-C(29')-H(29A)   | 107.9          | C(25')-C(26')-H(26D) | 108.9          |
| C(30')-C(29')-H(29A) | 107.9          | H(26C)-C(26')-H(26D) | 107.7          |
| N(2)-C(29')-H(29B)   | 107.9          | C(26')-C(27')-C(28') | 117.1(8)       |
| C(30')-C(29')-H(29B) | 107.9          | C(26')-C(27')-H(27C) | 108.0          |
| H(29A)-C(29')-H(29B) | 107.2          | C(28')-C(27')-H(27C) | 108.0          |
| N(1)-C(25')-C(26')   | 100.2(4)       | C(26')-C(27')-H(27D) | 108.0          |
| N(1)-C(25')-H(25A)   | 111.7          | C(28')-C(27')-H(27D) | 108.0          |
| C(26')-C(25')-H(25A) | 111.7          | H(27C)-C(27')-H(27D) | 107.3          |
| N(1)-C(25')-H(25B)   | 111.7          | C(27')-C(28')-H(28D) | 109.5          |
| C(26')-C(25')-H(25B) | 111.7          | C(27')-C(28')-H(28E) | 109.5          |
| H(25A)-C(25')-H(25B) | 109.5          | H(28D)-C(28')-H(28E) | 109.5          |
| C(2)-C(1)-C(6)       | 120.3(2)       | C(27')-C(28')-H(28F) | 109.5          |
| C(2)-C(1)-N(1)       | 110.87(19)     | H(28D)-C(28')-H(28F) | 109.5          |
| C(6)-C(1)-N(1)       | 128.6(2)       | H(28E)-C(28')-H(28F) | 109.5          |
| C(1)-C(2)-C(3)       | 118.9(2)       | C(31)-C(30)-H(30A)   | 106.9          |
| C(1)-C(2)-C(12)      | 105.8(2)       | C(31)-C(30)-H(30B)   | 106.9          |



|                   |            |                      |          |
|-------------------|------------|----------------------|----------|
| C(3)-C(2)-C(12)   | 135.2(2)   | H(30A)-C(30)-H(30B)  | 106.7    |
| C(4)-C(3)-C(2)    | 119.7(2)   | C(30)-C(31)-C(32)    | 120.7(9) |
| C(4)-C(3)-C(13)   | 107.2(2)   | C(30)-C(31)-H(31A)   | 107.2    |
| C(2)-C(3)-C(13)   | 133.0(2)   | C(32)-C(31)-H(31A)   | 107.2    |
| N(3)-C(4)-C(3)    | 108.34(19) | C(30)-C(31)-H(31B)   | 107.2    |
| N(3)-C(4)-C(5)    | 130.0(2)   | C(32)-C(31)-H(31B)   | 107.2    |
| C(3)-C(4)-C(5)    | 121.6(2)   | H(31A)-C(31)-H(31B)  | 106.8    |
| C(6)-C(5)-C(4)    | 116.70(19) | C(31')-C(30')-C(29') | 115.1(6) |
| C(6)-C(5)-C(24)   | 105.49(19) | C(31')-C(30')-H(30D) | 108.5    |
| C(4)-C(5)-C(24)   | 137.8(2)   | C(29')-C(30')-H(30D) | 108.5    |
| N(2)-C(6)-C(1)    | 127.7(2)   | C(31')-C(30')-H(30C) | 108.5    |
| N(2)-C(6)-C(5)    | 110.38(18) | C(29')-C(30')-H(30C) | 108.5    |
| C(1)-C(6)-C(5)    | 121.88(19) | H(30D)-C(30')-H(30C) | 107.5    |
| C(8)-C(7)-N(1)    | 127.4(2)   | C(30')-C(31')-C(32') | 115.0(9) |
| C(8)-C(7)-C(12)   | 122.2(2)   | C(30')-C(31')-H(31C) | 108.5    |
| N(1)-C(7)-C(12)   | 110.4(2)   | C(32')-C(31')-H(31C) | 108.5    |
| C(9)-C(8)-C(7)    | 118.2(3)   | C(30')-C(31')-H(31D) | 108.5    |
| C(9)-C(8)-H(8)    | 120.9      | C(32')-C(31')-H(31D) | 108.5    |
| C(7)-C(8)-H(8)    | 120.9      | H(31C)-C(31')-H(31D) | 107.5    |
| C(8)-C(9)-C(10)   | 120.8(3)   | C(31')-C(32')-H(32D) | 109.5    |
| C(8)-C(9)-H(9)    | 119.6      | C(31')-C(32')-H(32E) | 109.5    |
| C(10)-C(9)-H(9)   | 119.6      | H(32D)-C(32')-H(32E) | 109.5    |
| C(11)-C(10)-C(9)  | 121.5(3)   | C(31')-C(32')-H(32F) | 109.5    |
| C(11)-C(10)-H(10) | 119.2      | H(32D)-C(32')-H(32F) | 109.5    |
| C(9)-C(10)-H(10)  | 119.2      | H(32E)-C(32')-H(32F) | 109.5    |
| C(10)-C(11)-C(12) | 119.4(3)   | N(3)-C(33)-C(34)     | 110.6(4) |
| C(10)-C(11)-H(11) | 120.3      | N(3)-C(33)-H(33A)    | 109.5    |
| C(12)-C(11)-H(11) | 120.3      | C(34)-C(33)-H(33A)   | 109.5    |
| C(11)-C(12)-C(7)  | 117.8(2)   | N(3)-C(33)-H(33B)    | 109.5    |
| C(11)-C(12)-C(2)  | 135.4(3)   | C(34)-C(33)-H(33B)   | 109.5    |
| C(7)-C(12)-C(2)   | 106.60(19) | H(33A)-C(33)-H(33B)  | 108.1    |
| C(18)-C(13)-C(14) | 118.3(2)   | C(33)-C(34)-C(35)    | 115.1(6) |
| C(18)-C(13)-C(3)  | 106.3(2)   | C(33)-C(34)-H(34A)   | 108.5    |

|                   |            |                      |          |
|-------------------|------------|----------------------|----------|
| C(14)-C(13)-C(3)  | 135.4(3)   | C(35)-C(34)-H(34A)   | 108.5    |
| C(15)-C(14)-C(13) | 119.3(3)   | C(33)-C(34)-H(34B)   | 108.5    |
| C(15)-C(14)-H(14) | 120.3      | C(35)-C(34)-H(34B)   | 108.5    |
| C(13)-C(14)-H(14) | 120.3      | H(34A)-C(34)-H(34B)  | 107.5    |
| C(16)-C(15)-C(14) | 121.3(3)   | C(36)-C(35)-C(34)    | 120.1(8) |
| C(16)-C(15)-H(15) | 119.4      | C(36)-C(35)-H(35A)   | 107.3    |
| C(14)-C(15)-H(15) | 119.4      | C(34)-C(35)-H(35A)   | 107.3    |
| C(15)-C(16)-C(17) | 121.3(3)   | C(36)-C(35)-H(35B)   | 107.3    |
| C(15)-C(16)-H(16) | 119.4      | C(34)-C(35)-H(35B)   | 107.3    |
| C(17)-C(16)-H(16) | 119.4      | H(35A)-C(35)-H(35B)  | 106.9    |
| C(16)-C(17)-C(18) | 117.7(3)   | C(34')-C(33')-N(3)   | 109.8(7) |
| C(16)-C(17)-H(17) | 121.1      | C(34')-C(33')-H(33C) | 109.7    |
| C(18)-C(17)-H(17) | 121.1      | N(3)-C(33')-H(33C)   | 109.7    |
| N(3)-C(18)-C(13)  | 110.0(2)   | C(34')-C(33')-H(33D) | 109.7    |
| N(3)-C(18)-C(17)  | 128.0(3)   | N(3)-C(33')-H(33D)   | 109.7    |
| C(13)-C(18)-C(17) | 122.0(3)   | H(33C)-C(33')-H(33D) | 108.2    |
| N(2)-C(19)-C(20)  | 126.7(2)   | C(33')-C(34')-C(35') | 114.9(9) |
| N(2)-C(19)-C(24)  | 110.34(19) | C(33')-C(34')-H(34C) | 108.5    |
| C(20)-C(19)-C(24) | 123.0(2)   | C(35')-C(34')-H(34C) | 108.5    |
| C(21)-C(20)-C(19) | 117.8(3)   | C(33')-C(34')-H(34D) | 108.5    |
| C(21)-C(20)-H(20) | 121.1      | C(35')-C(34')-H(34D) | 108.5    |
| C(19)-C(20)-H(20) | 121.1      | H(34C)-C(34')-H(34D) | 107.5    |
| C(20)-C(21)-C(22) | 120.7(3)   | C(36')-C(35')-C(34') | 15.5(12) |
| C(20)-C(21)-H(21) | 119.6      | C(36')-C(35')-H(35C) | 108.4    |
| C(22)-C(21)-H(21) | 119.6      | C(34')-C(35')-H(35C) | 108.4    |
| C(23)-C(22)-C(21) | 121.5(3)   | C(36')-C(35')-H(35D) | 108.4    |
| C(23)-C(22)-H(22) | 119.2      | C(34')-C(35')-H(35D) | 108.4    |
| C(21)-C(22)-H(22) | 119.2      | H(35C)-C(35')-H(35D) | 107.5    |
| C(22)-C(23)-C(24) | 120.2(3)   | C(35')-C(36')-H(36D) | 109.5    |
| C(22)-C(23)-H(23) | 119.9      | C(35')-C(36')-H(36E) | 109.5    |
| C(24)-C(23)-H(23) | 119.9      | H(36D)-C(36')-H(36E) | 109.5    |
| C(23)-C(24)-C(19) | 116.7(2)   | C(35')-C(36')-H(36F) | 109.5    |
| C(23)-C(24)-C(5)  | 136.7(2)   | H(36D)-C(36')-H(36F) | 109.5    |

|                      |            |                      |            |
|----------------------|------------|----------------------|------------|
| C(19)-C(24)-C(5)     | 106.57(19) | H(36E)-C(36')-H(36F) | 109.5      |
| C(27)-C(26)-H(26A)   | 109.7      | C(7)-N(1)-C(1)       | 105.88(19) |
| C(27)-C(26)-H(26B)   | 109.7      | C(7)-N(1)-C(25')     | 118.7(2)   |
| H(26A)-C(26)-H(26B)  | 108.2      | C(1)-N(1)-C(25')     | 121.6(2)   |
| C(26)-C(27)-C(28)    | 112.7(7)   | C(19)-N(2)-C(6)      | 107.16(18) |
| C(26)-C(27)-H(27A)   | 109.0      | C(19)-N(2)-C(29')    | 120.21(19) |
| C(28)-C(27)-H(27A)   | 109.0      | C(6)-N(2)-C(29')     | 124.4(2)   |
| C(26)-C(27)-H(27B)   | 109.0      | C(18)-N(3)-C(4)      | 108.2(2)   |
| C(28)-C(27)-H(27B)   | 109.0      | C(18)-N(3)-C(33)     | 121.2(2)   |
| H(27A)-C(27)-H(27B)  | 107.8      | C(4)-N(3)-C(33)      | 129.6(2)   |
| C(27')-C(26')-C(25') | 113.6(7)   | C(18)-N(3)-C(33')    | 117.3(4)   |
| C(27')-C(26')-H(26C) | 108.9      | C(4)-N(3)-C(33')     | 119.9(4)   |
| C(25')-C(26')-H(26C) | 108.9      | C(33)-N(3)-C(33')    | 44.1(3)    |

**Table S13 Hydrogen Atom Coordinates ( $\text{\AA} \times 10^4$ ) and Isotropic Displacement Parameters ( $\text{\AA}^2 \times 10^3$ ) for ITN-2.**

| Atom   | x     | y    | z     | U(eq) |
|--------|-------|------|-------|-------|
| H(29A) | 6393  | 7978 | 2893  | 105   |
| H(29B) | 7580  | 7757 | 3546  | 105   |
| H(25A) | 9738  | 7346 | 3967  | 113   |
| H(25B) | 8495  | 7212 | 3224  | 113   |
| H(8)   | 11039 | 7310 | 6173  | 105   |
| H(9)   | 12184 | 7021 | 8223  | 124   |
| H(10)  | 11540 | 6438 | 9662  | 130   |
| H(11)  | 9767  | 6098 | 9072  | 111   |
| H(14)  | 8870  | 5406 | 8871  | 112   |
| H(15)  | 8360  | 4695 | 10126 | 131   |
| H(16)  | 6570  | 4408 | 9719  | 133   |
| H(17)  | 5222  | 4811 | 8006  | 122   |
| H(20)  | 4789  | 7709 | 1714  | 97    |
| H(21)  | 2983  | 7411 | 1087  | 119   |
| H(22)  | 2400  | 6691 | 2229  | 132   |
| H(23)  | 3600  | 6223 | 3958  | 110   |

---

|        |       |      |      |     |
|--------|-------|------|------|-----|
| H(25C) | 8427  | 7096 | 3252 | 113 |
| H(25D) | 9441  | 7460 | 3921 | 113 |
| H(26A) | 10581 | 6728 | 3957 | 117 |
| H(26B) | 9875  | 6848 | 2463 | 117 |
| H(27A) | 8612  | 6143 | 2818 | 127 |
| H(27B) | 9454  | 5995 | 4203 | 127 |
| H(28A) | 9729  | 5807 | 1549 | 202 |
| H(28B) | 9837  | 5368 | 2729 | 202 |
| H(28C) | 10763 | 5814 | 2798 | 202 |
| H(26C) | 10033 | 6336 | 4466 | 136 |
| H(26D) | 8831  | 6221 | 3598 | 136 |
| H(27C) | 10520 | 6636 | 2498 | 148 |
| H(27D) | 9324  | 6512 | 1638 | 148 |
| H(28D) | 10578 | 5831 | 1354 | 225 |
| H(28E) | 9612  | 5577 | 1904 | 225 |
| H(28F) | 10768 | 5675 | 2912 | 225 |
| H(29C) | 6766  | 7907 | 2743 | 105 |
| H(29D) | 7615  | 7785 | 4145 | 105 |
| H(30A) | 5638  | 8367 | 3719 | 142 |
| H(30B) | 5811  | 7957 | 4955 | 142 |
| H(31A) | 6966  | 8897 | 4755 | 154 |
| H(31B) | 7428  | 8452 | 5875 | 154 |
| H(32A) | 5421  | 8816 | 6036 | 166 |
| H(32B) | 6300  | 9293 | 6239 | 166 |
| H(32C) | 6505  | 8773 | 7207 | 166 |
| H(30D) | 7072  | 7885 | 5703 | 188 |
| H(30C) | 7471  | 8393 | 4977 | 188 |
| H(31C) | 5371  | 8153 | 5160 | 217 |
| H(31D) | 5554  | 8544 | 3989 | 217 |
| H(32D) | 5979  | 9250 | 5380 | 236 |
| H(32E) | 6727  | 8889 | 6541 | 236 |
| H(32F) | 5448  | 8906 | 6381 | 236 |
| H(33A) | 4415  | 5096 | 5823 | 102 |

---

|        |      |      |      |     |
|--------|------|------|------|-----|
| H(33B) | 4293 | 5591 | 4776 | 102 |
| H(34A) | 3745 | 6175 | 6382 | 146 |
| H(34B) | 3832 | 5671 | 7389 | 146 |
| H(35A) | 2013 | 5948 | 5973 | 181 |
| H(35B) | 2354 | 5610 | 4817 | 181 |
| H(36A) | 1782 | 4897 | 5466 | 353 |
| H(36B) | 1334 | 5250 | 6528 | 353 |
| H(36C) | 2506 | 4977 | 6965 | 353 |
| H(33C) | 4387 | 5882 | 7486 | 99  |
| H(33D) | 4155 | 6184 | 6054 | 99  |
| H(34C) | 3884 | 5030 | 6277 | 108 |
| H(34D) | 3512 | 5377 | 4924 | 108 |
| H(35C) | 2499 | 5416 | 7142 | 266 |
| H(35D) | 2167 | 5816 | 5880 | 266 |
| H(36D) | 1606 | 5024 | 4489 | 458 |
| H(36E) | 889  | 5142 | 5542 | 458 |
| H(36F) | 1788 | 4674 | 5844 | 458 |

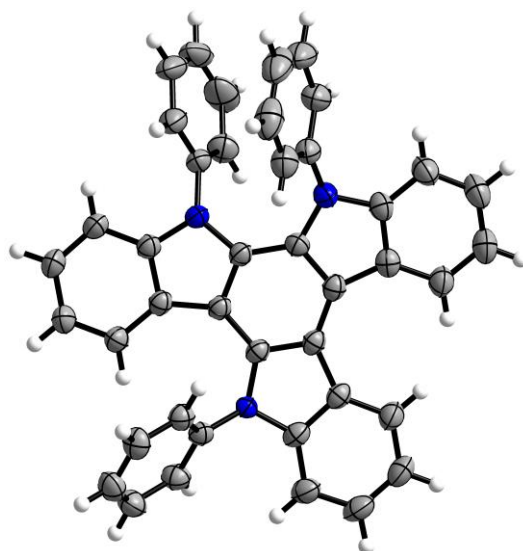

**Figure S24. X-Ray crystal structure of ITN-3 (The crystal was obtained by slow evaporation of the solution of DCM and PE) (CCDC: 2271798)**

**Table S14 Crystal data and structure refinement for ITN-3.**

|                     |                   |
|---------------------|-------------------|
| Identification code | <b>ITN-3</b>      |
| Empirical formula   | $C_{24}H_{27}N_3$ |

|                                             |                                                                  |
|---------------------------------------------|------------------------------------------------------------------|
| Formula weight                              | 573.67                                                           |
| Temperature/K                               | 236(2) K                                                         |
| Crystal system                              | Monoclinic                                                       |
| Space group                                 | P21/n                                                            |
| a/Å                                         | 16.36722(18)                                                     |
| b/Å                                         | 9.18575(9)                                                       |
| c/Å                                         | 19.55340(19)                                                     |
| $\alpha$ /°                                 | 90                                                               |
| $\beta$ /°                                  | 91.7495(9)                                                       |
| $\gamma$ /°                                 | 90                                                               |
| Volume/Å <sup>3</sup>                       | 2938.39(5)                                                       |
| Z                                           | 4                                                                |
| $\rho_{\text{calc}}/\text{cm}^3$            | 1.297                                                            |
| $\mu/\text{mm}^{-1}$                        | 0.587                                                            |
| F(000)                                      | 1200                                                             |
| Crystal size/mm <sup>3</sup>                | 0.32 x 0.25 x 0.13                                               |
| Radiation                                   | CuK $\alpha$ ( $\lambda = 1.54184$ )                             |
| 2 $\Theta$ range for data collection/°      | 6.94 to 156.12                                                   |
| Index ranges                                | -20 $\leq h \leq$ 19, -10 $\leq k \leq$ 11, -24 $\leq l \leq$ 24 |
| Reflections collected                       | 35966                                                            |
| Independent reflections                     | 6265 [R(int) = 0.0408]                                           |
| Data/restraints/parameters                  | 6265 / 1 / 407                                                   |
| Goodness-of-fit on F <sup>2</sup>           | 1.054                                                            |
| Final R indexes [I $\geq$ 2 $\sigma$ (I)]   | R1 = 0.0411, wR2 = 0.1138                                        |
| Final R indexes [all data]                  | R1 = 0.0453, wR2 = 0.1179                                        |
| Largest diff. peak/hole / e Å <sup>-3</sup> | 0.202 / -0.176                                                   |

**Table S15 Fractional Atomic Coordinates ( $\times 10^4$ ) and Equivalent Isotropic Displacement Parameters ( $\text{\AA}^2 \times 10^3$ ) for ITN-3.  $U_{\text{eq}}$  is defined as 1/3 of the trace of the orthogonalised  $U_{\text{ij}}$  tensor.**

| Atom | x       | y       | z        | U(eq) |
|------|---------|---------|----------|-------|
| C(1) | 2279(1) | 2381(1) | 9863(1)  | 37(1) |
| C(2) | 2062(1) | 1411(1) | 9332(1)  | 36(1) |
| C(3) | 1220(1) | 1210(1) | 9177(1)  | 36(1) |
| C(4) | 612(1)  | 1774(1) | 9594(1)  | 37(1) |
| C(5) | 847(1)  | 2757(1) | 10128(1) | 38(1) |
| C(6) | 1677(1) | 3125(1) | 10222(1) | 38(1) |

---

|       |          |         |          |       |
|-------|----------|---------|----------|-------|
| C(7)  | 3452(1)  | 1402(1) | 9498(1)  | 39(1) |
| C(8)  | 2816(1)  | 765(1)  | 9101(1)  | 37(1) |
| C(9)  | 3020(1)  | -320(1) | 8633(1)  | 43(1) |
| C(10) | 3829(1)  | -709(2) | 8566(1)  | 49(1) |
| C(11) | 4445(1)  | -61(2)  | 8965(1)  | 52(1) |
| C(12) | 4267(1)  | 993(2)  | 9439(1)  | 48(1) |
| C(13) | 993(1)   | 4480(1) | 10976(1) | 44(1) |
| C(14) | 412(1)   | 3608(1) | 10625(1) | 41(1) |
| C(15) | -405(1)  | 3756(2) | 10805(1) | 53(1) |
| C(16) | -619(1)  | 4734(2) | 11300(1) | 59(1) |
| C(17) | -36(1)   | 5598(2) | 11628(1) | 60(1) |
| C(18) | 777(1)   | 5494(2) | 11466(1) | 56(1) |
| C(19) | 16(1)    | 373(1)  | 8744(1)  | 41(1) |
| C(20) | -589(1)  | -262(2) | 8325(1)  | 53(1) |
| C(21) | -1388(1) | -76(2)  | 8505(1)  | 59(1) |
| C(22) | -1582(1) | 690(2)  | 9087(1)  | 58(1) |
| C(23) | -982(1)  | 1324(2) | 9494(1)  | 51(1) |
| C(24) | -162(1)  | 1208(1) | 9322(1)  | 40(1) |
| C(25) | 3582(1)  | 2768(1) | 10569(1) | 42(1) |
| C(26) | 4267(1)  | 3639(2) | 10537(1) | 57(1) |
| C(27) | 4729(1)  | 3909(2) | 11127(1) | 78(1) |
| C(28) | 4509(1)  | 3345(3) | 11734(1) | 88(1) |
| C(29) | 3825(1)  | 2480(3) | 11768(1) | 83(1) |
| C(30) | 3356(1)  | 2174(2) | 11180(1) | 57(1) |
| C(31) | 2398(1)  | 5275(1) | 10747(1) | 46(1) |
| C(32) | 2629(1)  | 5923(2) | 10144(1) | 56(1) |
| C(33) | 3223(1)  | 7006(2) | 10163(1) | 78(1) |
| C(34) | 3571(1)  | 7442(2) | 10781(1) | 87(1) |
| C(35) | 3336(1)  | 6798(2) | 11378(1) | 79(1) |
| C(36) | 2754(1)  | 5707(2) | 11366(1) | 60(1) |
| C(37) | 1205(1)  | 32(1)   | 8017(1)  | 39(1) |
| C(38) | 1629(1)  | 1080(1) | 7663(1)  | 43(1) |
| C(39) | 1963(1)  | 728(2)  | 7040(1)  | 52(1) |

---

|       |         |          |          |       |
|-------|---------|----------|----------|-------|
| C(40) | 1862(1) | -642(2)  | 6766(1)  | 57(1) |
| C(41) | 1430(1) | -1679(2) | 7115(1)  | 56(1) |
| C(42) | 1107(1) | -1352(1) | 7741(1)  | 48(1) |
| N(1)  | 3134(1) | 2412(1)  | 9951(1)  | 40(1) |
| N(2)  | 1774(1) | 4181(1)  | 10736(1) | 45(1) |
| N(3)  | 862(1)  | 356(1)   | 8659(1)  | 41(1) |

**Table S16 Anisotropic Displacement Parameters ( $\text{\AA}^2 \times 10^3$ ) for ITN-3. The Anisotropic displacement factor exponent takes the form:  $2\pi^2[h^2a^{*2}U_{11}+2hka^*b^*U_{12}+\dots]$ .**

| Atom  | U11   | U22   | U33   | U23    | U13   | U12    |
|-------|-------|-------|-------|--------|-------|--------|
| C(1)  | 32(1) | 43(1) | 35(1) | 1(1)   | -1(1) | 0(1)   |
| C(2)  | 33(1) | 40(1) | 34(1) | 2(1)   | -1(1) | 2(1)   |
| C(3)  | 33(1) | 39(1) | 35(1) | 3(1)   | -2(1) | 0(1)   |
| C(4)  | 33(1) | 39(1) | 38(1) | 5(1)   | -1(1) | 2(1)   |
| C(5)  | 36(1) | 40(1) | 37(1) | 5(1)   | 2(1)  | 4(1)   |
| C(6)  | 38(1) | 42(1) | 36(1) | -1(1)  | 1(1)  | 1(1)   |
| C(7)  | 35(1) | 45(1) | 35(1) | 1(1)   | -1(1) | 3(1)   |
| C(8)  | 34(1) | 40(1) | 36(1) | 3(1)   | 0(1)  | 3(1)   |
| C(9)  | 40(1) | 43(1) | 45(1) | -3(1)  | -4(1) | 5(1)   |
| C(10) | 45(1) | 51(1) | 52(1) | -9(1)  | 1(1)  | 10(1)  |
| C(11) | 36(1) | 63(1) | 57(1) | -7(1)  | 0(1)  | 11(1)  |
| C(12) | 33(1) | 61(1) | 49(1) | -5(1)  | -3(1) | 3(1)   |
| C(13) | 46(1) | 45(1) | 42(1) | 1(1)   | 10(1) | 2(1)   |
| C(14) | 43(1) | 40(1) | 39(1) | 5(1)   | 6(1)  | 5(1)   |
| C(15) | 43(1) | 59(1) | 56(1) | -2(1)  | 11(1) | 4(1)   |
| C(16) | 52(1) | 63(1) | 65(1) | -1(1)  | 19(1) | 9(1)   |
| C(17) | 68(1) | 55(1) | 59(1) | -8(1)  | 24(1) | 6(1)   |
| C(18) | 60(1) | 56(1) | 54(1) | -11(1) | 14(1) | -3(1)  |
| C(19) | 34(1) | 47(1) | 42(1) | 6(1)   | -1(1) | -4(1)  |
| C(20) | 43(1) | 68(1) | 47(1) | -1(1)  | -2(1) | -12(1) |
| C(21) | 39(1) | 77(1) | 61(1) | 4(1)   | -7(1) | -13(1) |
| C(22) | 33(1) | 66(1) | 74(1) | 3(1)   | 2(1)  | -2(1)  |



|       |       |        |        |        |        |        |
|-------|-------|--------|--------|--------|--------|--------|
| C(23) | 38(1) | 55(1)  | 62(1)  | -2(1)  | 5(1)   | 1(1)   |
| C(24) | 35(1) | 41(1)  | 43(1)  | 8(1)   | -1(1)  | 1(1)   |
| C(25) | 37(1) | 47(1)  | 41(1)  | -6(1)  | -6(1)  | 3(1)   |
| C(26) | 41(1) | 59(1)  | 71(1)  | -11(1) | -5(1)  | -4(1)  |
| C(27) | 49(1) | 80(1)  | 104(1) | -37(1) | -26(1) | 3(1)   |
| C(28) | 77(1) | 106(2) | 79(1)  | -46(1) | -42(1) | 35(1)  |
| C(29) | 97(1) | 109(2) | 42(1)  | -3(1)  | -14(1) | 34(1)  |
| C(30) | 60(1) | 67(1)  | 45(1)  | 2(1)   | -3(1)  | 3(1)   |
| C(31) | 41(1) | 45(1)  | 53(1)  | -7(1)  | 3(1)   | 1(1)   |
| C(32) | 53(1) | 53(1)  | 64(1)  | 3(1)   | 11(1)  | 5(1)   |
| C(33) | 64(1) | 58(1)  | 112(2) | 11(1)  | 30(1)  | 0(1)   |
| C(34) | 53(1) | 60(1)  | 148(2) | -19(1) | 13(1)  | -12(1) |
| C(35) | 56(1) | 71(1)  | 108(2) | -33(1) | -12(1) | -4(1)  |
| C(36) | 56(1) | 61(1)  | 63(1)  | -14(1) | -4(1)  | 0(1)   |
| C(37) | 35(1) | 45(1)  | 36(1)  | 0(1)   | -4(1)  | 1(1)   |
| C(38) | 42(1) | 41(1)  | 45(1)  | 1(1)   | -1(1)  | 2(1)   |
| C(39) | 53(1) | 55(1)  | 47(1)  | 9(1)   | 8(1)   | 2(1)   |
| C(40) | 62(1) | 65(1)  | 43(1)  | -6(1)  | 8(1)   | 6(1)   |
| C(41) | 64(1) | 52(1)  | 52(1)  | -13(1) | 0(1)   | 0(1)   |
| C(42) | 50(1) | 45(1)  | 48(1)  | -1(1)  | 1(1)   | -6(1)  |
| N(1)  | 31(1) | 52(1)  | 38(1)  | -5(1)  | -2(1)  | 1(1)   |
| N(2)  | 43(1) | 50(1)  | 44(1)  | -10(1) | 7(1)   | -3(1)  |
| N(3)  | 35(1) | 51(1)  | 38(1)  | -2(1)  | -1(1)  | -4(1)  |

**Table S17 Bond Lengths for ITN-3.**

| <b>Bond</b> | <b>Angle/°</b> | <b>Bond</b> | <b>Angle/°</b> |
|-------------|----------------|-------------|----------------|
| C(1)-N(1)   | 1.4039(14)     | C(19)-N(3)  | 1.4002(15)     |
| C(1)-C(6)   | 1.4053(16)     | C(19)-C(24) | 1.4024(17)     |
| C(1)-C(2)   | 1.4054(15)     | C(20)-C(21) | 1.375(2)       |
| C(2)-C(3)   | 1.4146(15)     | C(21)-C(22) | 1.384(2)       |
| C(2)-C(8)   | 1.4537(15)     | C(22)-C(23) | 1.375(2)       |
| C(3)-N(3)   | 1.3966(14)     | C(23)-C(24) | 1.3973(17)     |
| C(3)-C(4)   | 1.4044(16)     | C(25)-C(30) | 1.3748(19)     |

|             |            |             |            |
|-------------|------------|-------------|------------|
| C(4)-C(5)   | 1.4238(16) | C(25)-C(26) | 1.3805(19) |
| C(4)-C(24)  | 1.4558(15) | C(25)-N(1)  | 1.4313(14) |
| C(5)-C(6)   | 1.4067(16) | C(26)-C(27) | 1.383(2)   |
| C(5)-C(14)  | 1.4508(16) | C(27)-C(28) | 1.354(3)   |
| C(6)-N(2)   | 1.4027(15) | C(28)-C(29) | 1.376(3)   |
| C(7)-C(12)  | 1.3941(16) | C(29)-C(30) | 1.390(2)   |
| C(7)-N(1)   | 1.3949(15) | C(31)-C(32) | 1.384(2)   |
| C(7)-C(8)   | 1.4075(16) | C(31)-C(36) | 1.386(2)   |
| C(8)-C(9)   | 1.3996(16) | C(31)-N(2)  | 1.4321(16) |
| C(9)-C(10)  | 1.3828(17) | C(32)-C(33) | 1.391(2)   |
| C(10)-C(11) | 1.3897(19) | C(33)-C(34) | 1.378(3)   |
| C(11)-C(12) | 1.3781(19) | C(34)-C(35) | 1.375(3)   |
| C(13)-C(18) | 1.3909(18) | C(35)-C(36) | 1.383(2)   |
| C(13)-N(2)  | 1.4017(16) | C(37)-C(38) | 1.3837(17) |
| C(13)-C(14) | 1.4061(18) | C(37)-C(42) | 1.3878(17) |
| C(14)-C(15) | 1.4000(17) | C(37)-N(3)  | 1.4227(15) |
| C(15)-C(16) | 1.374(2)   | C(38)-C(39) | 1.3888(18) |
| C(16)-C(17) | 1.384(2)   | C(39)-C(40) | 1.377(2)   |
| C(17)-C(18) | 1.379(2)   | C(40)-C(41) | 1.380(2)   |
| C(19)-C(20) | 1.3929(17) | C(41)-C(42) | 1.3811(19) |

**Table S18 Bond Angles for ITN-3.**

| <b>Bond</b>    | <b>Angle/°</b> | <b>Bond</b>       | <b>Angle/°</b> |
|----------------|----------------|-------------------|----------------|
| N(1)-C(1)-C(6) | 129.80(10)     | C(21)-C(20)-C(19) | 117.54(13)     |
| N(1)-C(1)-C(2) | 109.41(9)      | C(20)-C(21)-C(22) | 121.10(13)     |
| C(6)-C(1)-C(2) | 120.78(10)     | C(23)-C(22)-C(21) | 120.97(13)     |
| C(1)-C(2)-C(3) | 117.62(10)     | C(22)-C(23)-C(24) | 120.10(13)     |
| C(1)-C(2)-C(8) | 106.91(9)      | C(23)-C(24)-C(19) | 117.44(11)     |
| C(3)-C(2)-C(8) | 135.32(10)     | C(23)-C(24)-C(4)  | 135.68(12)     |
| N(3)-C(3)-C(4) | 109.82(10)     | C(19)-C(24)-C(4)  | 106.87(10)     |
| N(3)-C(3)-C(2) | 127.85(10)     | C(30)-C(25)-C(26) | 120.65(13)     |
| C(4)-C(3)-C(2) | 122.07(10)     | C(30)-C(25)-N(1)  | 119.90(12)     |
| C(3)-C(4)-C(5) | 118.62(10)     | C(26)-C(25)-N(1)  | 119.34(12)     |

|                   |            |                   |            |
|-------------------|------------|-------------------|------------|
| C(3)-C(4)-C(24)   | 106.27(10) | C(25)-C(26)-C(27) | 119.36(17) |
| C(5)-C(4)-C(24)   | 135.02(11) | C(28)-C(27)-C(26) | 120.59(18) |
| C(6)-C(5)-C(4)    | 119.11(10) | C(27)-C(28)-C(29) | 120.14(15) |
| C(6)-C(5)-C(14)   | 105.91(10) | C(28)-C(29)-C(30) | 120.40(18) |
| C(4)-C(5)-C(14)   | 134.89(11) | C(25)-C(30)-C(29) | 118.85(17) |
| N(2)-C(6)-C(1)    | 128.94(11) | C(32)-C(31)-C(36) | 120.19(14) |
| N(2)-C(6)-C(5)    | 110.37(10) | C(32)-C(31)-N(2)  | 120.17(12) |
| C(1)-C(6)-C(5)    | 120.48(10) | C(36)-C(31)-N(2)  | 119.62(13) |
| C(12)-C(7)-N(1)   | 127.53(11) | C(31)-C(32)-C(33) | 119.57(16) |
| C(12)-C(7)-C(8)   | 122.37(11) | C(34)-C(33)-C(32) | 120.10(18) |
| N(1)-C(7)-C(8)    | 110.06(10) | C(35)-C(34)-C(33) | 120.05(16) |
| C(9)-C(8)-C(7)    | 118.05(10) | C(34)-C(35)-C(36) | 120.51(18) |
| C(9)-C(8)-C(2)    | 135.65(10) | C(35)-C(36)-C(31) | 119.58(17) |
| C(7)-C(8)-C(2)    | 106.19(10) | C(38)-C(37)-C(42) | 119.83(11) |
| C(10)-C(9)-C(8)   | 119.62(11) | C(38)-C(37)-N(3)  | 120.83(11) |
| C(9)-C(10)-C(11)  | 121.09(12) | C(42)-C(37)-N(3)  | 119.34(11) |
| C(12)-C(11)-C(10) | 120.96(12) | C(37)-C(38)-C(39) | 119.55(12) |
| C(11)-C(12)-C(7)  | 117.89(11) | C(40)-C(39)-C(38) | 120.60(13) |
| C(18)-C(13)-N(2)  | 127.99(12) | C(39)-C(40)-C(41) | 119.67(13) |
| C(18)-C(13)-C(14) | 122.37(12) | C(40)-C(41)-C(42) | 120.32(13) |
| N(2)-C(13)-C(14)  | 109.61(10) | C(41)-C(42)-C(37) | 120.01(12) |
| C(15)-C(14)-C(13) | 117.33(11) | C(7)-N(1)-C(1)    | 107.35(9)  |
| C(15)-C(14)-C(5)  | 135.47(12) | C(7)-N(1)-C(25)   | 119.72(9)  |
| C(13)-C(14)-C(5)  | 107.19(10) | C(1)-N(1)-C(25)   | 126.26(10) |
| C(16)-C(15)-C(14) | 120.45(14) | C(13)-N(2)-C(6)   | 106.87(10) |
| C(15)-C(16)-C(17) | 120.93(14) | C(13)-N(2)-C(31)  | 121.00(10) |
| C(18)-C(17)-C(16) | 120.75(13) | C(6)-N(2)-C(31)   | 124.11(10) |
| C(17)-C(18)-C(13) | 118.13(14) | C(3)-N(3)-C(19)   | 107.58(9)  |
| C(20)-C(19)-N(3)  | 127.79(12) | C(3)-N(3)-C(37)   | 126.13(10) |
| C(20)-C(19)-C(24) | 122.74(11) | C(19)-N(3)-C(37)  | 121.78(9)  |
| N(3)-C(19)-C(24)  | 109.42(10) |                   |            |

**Table S19 Hydrogen Atom Coordinates ( $\text{\AA}\times 10^4$ ) and Isotropic Displacement Parameters ( $\text{\AA}^2\times 10^3$ ) for ITN-3.**

| <b>Atom</b> | <b>x</b> | <b>y</b> | <b>z</b> | <b>U(eq)</b> |
|-------------|----------|----------|----------|--------------|
| H(9)        | 2608     | -782     | 8366     | 51           |
| H(10)       | 3966     | -1424    | 8244     | 59           |
| H(11)       | 4991     | -346     | 8910     | 62           |
| H(12)       | 4682     | 1423     | 9714     | 57           |
| H(15)       | -810     | 3183     | 10585    | 63           |
| H(16)       | -1170    | 4817     | 11418    | 71           |
| H(17)       | -195     | 6263     | 11964    | 72           |
| H(18)       | 1173     | 6092     | 11682    | 68           |
| H(20)       | -456     | -797     | 7935     | 63           |
| H(21)       | -1810    | -476     | 8227     | 71           |
| H(22)       | -2132    | 779      | 9206     | 69           |
| H(23)       | -1123    | 1836     | 9890     | 61           |
| H(26)       | 4418     | 4045     | 10118    | 69           |
| H(27)       | 5201     | 4490     | 11107    | 94           |
| H(28)       | 4823     | 3546     | 12133    | 106          |
| H(29)       | 3673     | 2093     | 12190    | 100          |
| H(30)       | 2894     | 1571     | 11201    | 69           |
| H(32)       | 2387     | 5632     | 9724     | 67           |
| H(33)       | 3387     | 7443     | 9755     | 93           |
| H(34)       | 3969     | 8179     | 10793    | 104          |
| H(35)       | 3573     | 7103     | 11798    | 95           |
| H(36)       | 2600     | 5261     | 11775    | 72           |
| H(38)       | 1690     | 2023     | 7844     | 51           |
| H(39)       | 2262     | 1432     | 6804     | 62           |
| H(40)       | 2086     | -871     | 6342     | 68           |
| H(41)       | 1354     | -2612    | 6926     | 67           |
| H(42)       | 820      | -2067    | 7981     | 57           |

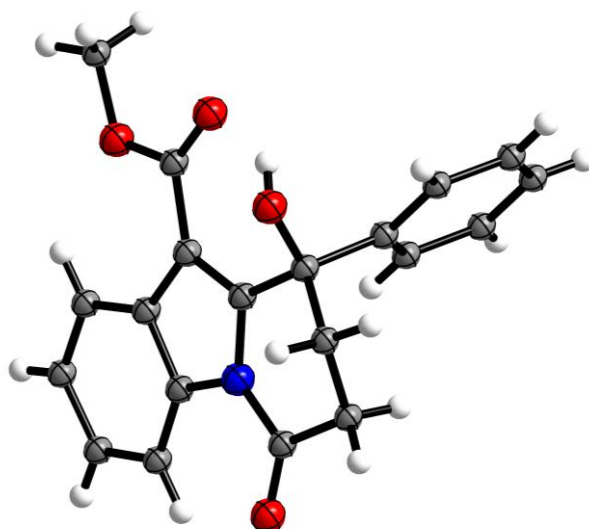

**Figure S25. X-Ray crystal structure of 2a (The crystal was obtained by slow evaporation of the solution of DCM and PE) (CCDC: 2309597)**

**Table S20 Crystal data and structure refinement for 2a.**

|                                                |                                                                  |
|------------------------------------------------|------------------------------------------------------------------|
| Identification code                            | <b>2a</b>                                                        |
| Empirical formula                              | $C_{40}H_{34}N_2O_8$                                             |
| Formula weight                                 | 668.68                                                           |
| Temperature/K                                  | 301(2) K                                                         |
| Crystal system                                 | triclinic                                                        |
| Space group                                    | P -1                                                             |
| a/Å                                            | 6.01120(10)                                                      |
| b/Å                                            | 15.7452(2)                                                       |
| c/Å                                            | 19.7395(2)                                                       |
| $\alpha/^\circ$                                | 83.7750(10)                                                      |
| $\beta/^\circ$                                 | 82.4220(10)                                                      |
| $\gamma/^\circ$                                | 80.2710(10)                                                      |
| Volume/Å <sup>3</sup>                          | 1818.23(4)                                                       |
| Z                                              | 4                                                                |
| $\rho_{\text{calc}}/\text{cm}^3$               | 1.221                                                            |
| $\mu/\text{mm}^{-1}$                           | 0.703                                                            |
| F(000)                                         | 700                                                              |
| Crystal size/mm <sup>3</sup>                   | 0.32 x 0.25 x 0.13                                               |
| Radiation                                      | CuK $\alpha$ ( $\lambda = 0.714$ )                               |
| 2 $\theta$ range for data collection/ $^\circ$ | 3.19 to 78.12                                                    |
| Index ranges                                   | -7 $\leq h \leq 6$ , -19 $\leq k \leq 19$ , -24 $\leq l \leq 25$ |
| Reflections collected                          | 33979                                                            |
| Independent reflections                        | 7682 [R(int) = 0.0485]                                           |

|                                             |                           |
|---------------------------------------------|---------------------------|
| Data/restraints/parameters                  | 7682 / 0 / 456            |
| Goodness-of-fit on F2                       | 1.495                     |
| Final R indexes [ $I \geq 2\sigma(I)$ ]     | R1 = 0.1029, wR2 = 0.3149 |
| Final R indexes [all data]                  | R1 = 0.1094, wR2 = 0.3290 |
| Largest diff. peak/hole / e Å <sup>-3</sup> | 1.690 / -0.296            |

**Table S21 Fractional Atomic Coordinates ( $\times 10^4$ ) and Equivalent Isotropic Displacement Parameters ( $\text{Å}^2 \times 10^3$ ) for 2a.  $U_{\text{eq}}$  is defined as 1/3 of the trace of the orthogonalised  $U_{\text{ij}}$  tensor.**

| Atom  | x        | y       | z       | U(eq) |
|-------|----------|---------|---------|-------|
| O(20) | 12131(2) | 6885(1) | 3779(1) | 63(1) |
| O(45) | 9450(3)  | 2676(1) | 2778(1) | 67(1) |
| O(46) | 980(3)   | 4302(1) | 3387(1) | 65(1) |
| O(21) | 5484(3)  | 5140(1) | 3591(1) | 68(1) |
| N(1)  | 7204(3)  | 6314(1) | 3202(1) | 48(1) |
| N(26) | 3697(3)  | 3722(1) | 2577(1) | 47(1) |
| O(25) | 11528(4) | 8285(2) | 2904(1) | 77(1) |
| O(23) | 9984(5)  | 8552(2) | 1929(1) | 88(1) |
| O(48) | 8181(5)  | 3207(2) | 592(1)  | 94(1) |
| O(50) | 9810(4)  | 2431(2) | 1467(1) | 96(1) |
| C(2)  | 8702(3)  | 6881(1) | 3262(1) | 47(1) |
| C(27) | 5790(3)  | 3233(1) | 2379(1) | 48(1) |
| C(34) | 2796(3)  | 4163(1) | 1994(1) | 51(1) |
| C(14) | 8585(3)  | 7608(1) | 4337(1) | 47(1) |
| C(3)  | 8880(3)  | 7414(1) | 2665(1) | 52(1) |
| C(35) | 7081(3)  | 2650(1) | 2912(1) | 50(1) |
| C(13) | 6558(3)  | 5671(1) | 3713(1) | 52(1) |
| C(10) | 9757(3)  | 6857(1) | 3923(1) | 49(1) |
| C(4)  | 7424(4)  | 7178(2) | 2209(1) | 55(1) |
| C(38) | 2676(3)  | 3789(1) | 3257(1) | 50(1) |
| C(28) | 6263(4)  | 3364(2) | 1681(1) | 55(1) |
| C(9)  | 6410(3)  | 6490(2) | 2559(1) | 52(1) |
| C(39) | 6621(4)  | 1717(1) | 2936(1) | 53(1) |
| C(19) | 6339(4)  | 7982(2) | 4306(1) | 57(1) |

|       |           |         |         |        |
|-------|-----------|---------|---------|--------|
| C(29) | 4374(4)   | 3958(2) | 1426(1) | 56(1)  |
| C(11) | 9606(4)   | 5988(2) | 4348(1) | 58(1)  |
| C(22) | 10290(4)  | 8104(2) | 2530(1) | 62(1)  |
| C(36) | 6375(4)   | 3002(2) | 3612(1) | 60(1)  |
| C(12) | 7253(4)   | 5738(2) | 4403(1) | 61(1)  |
| C(37) | 3829(5)   | 3174(2) | 3781(1) | 63(1)  |
| C(33) | 698(4)    | 4694(2) | 1941(2) | 65(1)  |
| C(18) | 5340(4)   | 8635(2) | 4723(2) | 68(1)  |
| C(15) | 9794(4)   | 7914(2) | 4787(1) | 63(1)  |
| C(47) | 8271(5)   | 2949(2) | 1261(2) | 70(1)  |
| C(17) | 6555(6)   | 8922(2) | 5165(1) | 71(1)  |
| C(44) | 8124(5)   | 1051(2) | 3232(1) | 68(1)  |
| C(5)  | 6867(5)   | 7491(2) | 1553(1) | 70(1)  |
| C(8)  | 4818(4)   | 6121(2) | 2281(2) | 66(1)  |
| C(30) | 3875(5)   | 4324(2) | 772(1)  | 73(1)  |
| C(16) | 8791(6)   | 8568(2) | 5191(2) | 74(1)  |
| C(6)  | 5314(6)   | 7122(3) | 1276(2) | 81(1)  |
| C(32) | 258(5)    | 5035(2) | 1283(2) | 79(1)  |
| C(7)  | 4301(5)   | 6454(2) | 1634(2) | 78(1)  |
| C(31) | 1828(6)   | 4864(2) | 715(2)  | 81(1)  |
| C(40) | 4748(5)   | 1509(2) | 2691(2) | 78(1)  |
| C(43) | 7701(7)   | 202(2)  | 3290(2) | 88(1)  |
| C(42) | 5834(7)   | 8(2)    | 3059(2) | 92(1)  |
| C(41) | 4365(6)   | 651(2)  | 2761(3) | 101(1) |
| C(24) | 11344(10) | 9238(3) | 1750(3) | 117(2) |
| C(49) | 10105(10) | 2866(4) | 134(2)  | 123(2) |

**Table S22 Anisotropic Displacement Parameters ( $\text{\AA}^2 \times 10^3$ ) for 2a. The Anisotropic displacement factor exponent takes the form:  $2\pi^2[h^2a^{*2}U_{11}+2hka^*b^*U_{12}+\dots]$ .**

| Atom  | U11   | U22   | U33   | U23    | U13   | U12   |
|-------|-------|-------|-------|--------|-------|-------|
| O(20) | 37(1) | 76(1) | 77(1) | -23(1) | -5(1) | -3(1) |
| O(45) | 42(1) | 70(1) | 87(1) | -4(1)  | -9(1) | -9(1) |

---

|       |        |        |       |        |        |        |
|-------|--------|--------|-------|--------|--------|--------|
| O(46) | 51(1)  | 66(1)  | 75(1) | -26(1) | 2(1)   | 1(1)   |
| O(21) | 60(1)  | 48(1)  | 98(1) | -8(1)  | -13(1) | -14(1) |
| N(1)  | 42(1)  | 46(1)  | 57(1) | -13(1) | -4(1)  | -6(1)  |
| N(26) | 43(1)  | 46(1)  | 52(1) | -8(1)  | -2(1)  | -5(1)  |
| O(25) | 75(1)  | 78(1)  | 87(1) | -15(1) | -4(1)  | -36(1) |
| O(23) | 111(2) | 82(1)  | 77(1) | 6(1)   | -5(1)  | -45(1) |
| O(48) | 108(2) | 97(2)  | 62(1) | -11(1) | 24(1)  | 3(1)   |
| O(50) | 77(1)  | 104(2) | 88(2) | -16(1) | 17(1)  | 22(1)  |
| C(2)  | 40(1)  | 47(1)  | 55(1) | -16(1) | 0(1)   | -4(1)  |
| C(27) | 42(1)  | 45(1)  | 54(1) | -8(1)  | -2(1)  | -6(1)  |
| C(34) | 48(1)  | 48(1)  | 59(1) | -6(1)  | -9(1)  | -9(1)  |
| C(14) | 46(1)  | 44(1)  | 49(1) | -9(1)  | -1(1)  | -6(1)  |
| C(3)  | 49(1)  | 54(1)  | 53(1) | -15(1) | 3(1)   | -10(1) |
| C(35) | 42(1)  | 48(1)  | 60(1) | -7(1)  | -5(1)  | -5(1)  |
| C(13) | 44(1)  | 40(1)  | 71(1) | -8(1)  | -4(1)  | -2(1)  |
| C(10) | 38(1)  | 51(1)  | 58(1) | -15(1) | -5(1)  | -2(1)  |
| C(4)  | 52(1)  | 59(1)  | 54(1) | -16(1) | 1(1)   | -6(1)  |
| C(38) | 49(1)  | 48(1)  | 56(1) | -15(1) | 3(1)   | -10(1) |
| C(28) | 52(1)  | 56(1)  | 55(1) | -8(1)  | 1(1)   | -6(1)  |
| C(9)  | 45(1)  | 56(1)  | 55(1) | -17(1) | -3(1)  | -5(1)  |
| C(39) | 50(1)  | 47(1)  | 59(1) | -11(1) | 4(1)   | -2(1)  |
| C(19) | 46(1)  | 50(1)  | 75(1) | -16(1) | -3(1)  | -4(1)  |
| C(29) | 57(1)  | 58(1)  | 55(1) | -5(1)  | -8(1)  | -11(1) |
| C(11) | 58(1)  | 49(1)  | 68(1) | -10(1) | -17(1) | 4(1)   |
| C(22) | 64(1)  | 59(1)  | 64(1) | -13(1) | 8(1)   | -19(1) |
| C(36) | 69(1)  | 54(1)  | 59(1) | -9(1)  | -18(1) | -4(1)  |
| C(12) | 67(1)  | 48(1)  | 64(1) | 1(1)   | -7(1)  | -7(1)  |
| C(37) | 75(1)  | 59(1)  | 52(1) | -7(1)  | 4(1)   | -4(1)  |
| C(33) | 51(1)  | 61(1)  | 83(2) | -2(1)  | -15(1) | -3(1)  |
| C(18) | 59(1)  | 52(1)  | 88(2) | -15(1) | 6(1)   | 2(1)   |
| C(15) | 61(1)  | 72(1)  | 60(1) | -19(1) | -14(1) | -6(1)  |
| C(47) | 68(1)  | 70(2)  | 65(1) | -13(1) | 12(1)  | -4(1)  |
| C(17) | 97(2)  | 51(1)  | 61(1) | -18(1) | 14(1)  | -7(1)  |

---



|       |        |        |        |        |        |        |
|-------|--------|--------|--------|--------|--------|--------|
| C(44) | 80(2)  | 55(1)  | 65(1)  | -7(1)  | -11(1) | 5(1)   |
| C(5)  | 74(2)  | 82(2)  | 54(1)  | -9(1)  | -4(1)  | -12(1) |
| C(8)  | 58(1)  | 72(2)  | 74(2)  | -24(1) | -11(1) | -14(1) |
| C(30) | 83(2)  | 83(2)  | 56(1)  | 1(1)   | -15(1) | -19(1) |
| C(16) | 91(2)  | 75(2)  | 60(1)  | -25(1) | -13(1) | -11(1) |
| C(6)  | 82(2)  | 102(2) | 60(1)  | -19(1) | -18(1) | -5(2)  |
| C(32) | 66(2)  | 76(2)  | 97(2)  | 8(2)   | -32(2) | -7(1)  |
| C(7)  | 70(2)  | 99(2)  | 73(2)  | -25(2) | -20(1) | -15(1) |
| C(31) | 87(2)  | 86(2)  | 75(2)  | 10(1)  | -35(2) | -19(2) |
| C(40) | 54(1)  | 57(1)  | 126(3) | -18(2) | -13(1) | -8(1)  |
| C(43) | 124(3) | 51(1)  | 77(2)  | -4(1)  | -3(2)  | 9(2)   |
| C(42) | 114(3) | 48(1)  | 107(2) | -19(1) | 22(2)  | -13(2) |
| C(41) | 79(2)  | 70(2)  | 160(4) | -37(2) | -2(2)  | -25(2) |
| C(24) | 154(4) | 99(3)  | 106(3) | 8(2)   | 8(3)   | -70(3) |
| C(49) | 145(4) | 118(3) | 86(2)  | -26(2) | 52(3)  | -1(3)  |

**Table S23 Bond Lengths for 2a.**

| <b>Bond</b> | <b>Angle/°</b> | <b>Bond</b> | <b>Angle/°</b> |
|-------------|----------------|-------------|----------------|
| O(20)-C(10) | 1.426(2)       | C(35)-C(39) | 1.534(3)       |
| O(45)-C(35) | 1.421(2)       | C(13)-C(12) | 1.494(4)       |
| O(46)-C(38) | 1.206(3)       | C(10)-C(11) | 1.535(3)       |
| O(21)-C(13) | 1.201(3)       | C(4)-C(5)   | 1.398(4)       |
| N(1)-C(2)   | 1.394(2)       | C(4)-C(9)   | 1.403(3)       |
| N(1)-C(9)   | 1.398(3)       | C(38)-C(37) | 1.496(3)       |
| N(1)-C(13)  | 1.416(3)       | C(28)-C(29) | 1.452(3)       |
| N(26)-C(27) | 1.392(3)       | C(28)-C(47) | 1.469(3)       |
| N(26)-C(34) | 1.401(3)       | C(9)-C(8)   | 1.396(3)       |
| N(26)-C(38) | 1.408(3)       | C(39)-C(40) | 1.383(4)       |
| O(25)-C(22) | 1.201(3)       | C(39)-C(44) | 1.394(3)       |
| O(23)-C(22) | 1.331(4)       | C(19)-C(18) | 1.393(3)       |
| O(23)-C(24) | 1.449(4)       | C(29)-C(30) | 1.404(3)       |
| O(48)-C(47) | 1.343(4)       | C(11)-C(12) | 1.519(3)       |
| O(48)-C(49) | 1.436(4)       | C(36)-C(37) | 1.507(4)       |

|             |          |             |          |
|-------------|----------|-------------|----------|
| O(50)-C(47) | 1.209(4) | C(33)-C(32) | 1.391(4) |
| C(2)-C(3)   | 1.373(3) | C(18)-C(17) | 1.366(4) |
| C(2)-C(10)  | 1.519(3) | C(15)-C(16) | 1.379(4) |
| C(27)-C(28) | 1.369(3) | C(17)-C(16) | 1.371(5) |
| C(27)-C(35) | 1.523(3) | C(44)-C(43) | 1.392(5) |
| C(34)-C(29) | 1.399(3) | C(5)-C(6)   | 1.377(4) |
| C(34)-C(33) | 1.400(3) | C(8)-C(7)   | 1.381(4) |
| C(14)-C(19) | 1.385(3) | C(30)-C(31) | 1.383(5) |
| C(14)-C(15) | 1.390(3) | C(6)-C(7)   | 1.386(5) |
| C(14)-C(10) | 1.529(3) | C(32)-C(31) | 1.385(5) |
| C(3)-C(4)   | 1.450(3) | C(40)-C(41) | 1.398(4) |
| C(3)-C(22)  | 1.469(3) | C(43)-C(42) | 1.357(6) |
| C(35)-C(36) | 1.525(3) | C(42)-C(41) | 1.363(6) |

**Table S24 Bond Angles for 2a.**

| <b>Bond</b>       | <b>Angle/°</b> | <b>Bond</b>       | <b>Angle/°</b> |
|-------------------|----------------|-------------------|----------------|
| C(2)-N(1)-C(9)    | 109.18(18)     | O(46)-C(38)-C(37) | 124.2(2)       |
| C(2)-N(1)-C(13)   | 125.53(18)     | N(26)-C(38)-C(37) | 114.84(18)     |
| C(9)-N(1)-C(13)   | 125.28(17)     | C(27)-C(28)-C(29) | 107.77(19)     |
| C(27)-N(26)-C(34) | 109.32(17)     | C(27)-C(28)-C(47) | 126.3(2)       |
| C(27)-N(26)-C(38) | 125.55(18)     | C(29)-C(28)-C(47) | 125.9(2)       |
| C(34)-N(26)-C(38) | 125.10(17)     | C(8)-C(9)-N(1)    | 129.8(2)       |
| C(22)-O(23)-C(24) | 114.8(3)       | C(8)-C(9)-C(4)    | 122.3(2)       |
| C(47)-O(48)-C(49) | 115.8(3)       | N(1)-C(9)-C(4)    | 107.74(18)     |
| C(3)-C(2)-N(1)    | 108.50(18)     | C(40)-C(39)-C(44) | 118.4(2)       |
| C(3)-C(2)-C(10)   | 131.01(18)     | C(40)-C(39)-C(35) | 122.8(2)       |
| N(1)-C(2)-C(10)   | 120.45(18)     | C(44)-C(39)-C(35) | 118.7(2)       |
| C(28)-C(27)-N(26) | 108.58(18)     | C(14)-C(19)-C(18) | 120.3(2)       |
| C(28)-C(27)-C(35) | 131.35(19)     | C(34)-C(29)-C(30) | 118.7(2)       |
| N(26)-C(27)-C(35) | 120.02(18)     | C(34)-C(29)-C(28) | 106.97(19)     |
| C(29)-C(34)-C(33) | 123.1(2)       | C(30)-C(29)-C(28) | 134.3(2)       |
| C(29)-C(34)-N(26) | 107.36(18)     | C(12)-C(11)-C(10) | 112.15(18)     |
| C(33)-C(34)-N(26) | 129.5(2)       | O(25)-C(22)-O(23) | 121.9(2)       |

|                   |            |                   |            |
|-------------------|------------|-------------------|------------|
| C(19)-C(14)-C(15) | 117.9(2)   | O(25)-C(22)-C(3)  | 126.8(3)   |
| C(19)-C(14)-C(10) | 123.28(18) | O(23)-C(22)-C(3)  | 111.2(2)   |
| C(15)-C(14)-C(10) | 118.79(19) | C(37)-C(36)-C(35) | 112.05(19) |
| C(2)-C(3)-C(4)    | 107.91(19) | C(13)-C(12)-C(11) | 111.9(2)   |
| C(2)-C(3)-C(22)   | 125.0(2)   | C(38)-C(37)-C(36) | 112.9(2)   |
| C(4)-C(3)-C(22)   | 127.1(2)   | C(32)-C(33)-C(34) | 116.3(3)   |
| O(45)-C(35)-C(27) | 110.96(17) | C(17)-C(18)-C(19) | 120.8(2)   |
| O(45)-C(35)-C(36) | 104.76(18) | C(16)-C(15)-C(14) | 121.1(2)   |
| C(27)-C(35)-C(36) | 109.18(17) | O(50)-C(47)-O(48) | 122.7(3)   |
| O(45)-C(35)-C(39) | 110.45(17) | O(50)-C(47)-C(28) | 126.3(3)   |
| C(27)-C(35)-C(39) | 110.73(17) | O(48)-C(47)-C(28) | 111.0(2)   |
| C(36)-C(35)-C(39) | 110.61(18) | C(18)-C(17)-C(16) | 119.3(2)   |
| O(21)-C(13)-N(1)  | 121.2(2)   | C(43)-C(44)-C(39) | 120.2(3)   |
| O(21)-C(13)-C(12) | 124.4(2)   | C(6)-C(5)-C(4)    | 118.8(3)   |
| N(1)-C(13)-C(12)  | 114.43(18) | C(7)-C(8)-C(9)    | 116.9(3)   |
| O(20)-C(10)-C(2)  | 110.46(17) | C(31)-C(30)-C(29) | 118.5(3)   |
| O(20)-C(10)-C(14) | 110.34(16) | C(17)-C(16)-C(15) | 120.5(3)   |
| C(2)-C(10)-C(14)  | 110.57(16) | C(5)-C(6)-C(7)    | 121.4(3)   |
| O(20)-C(10)-C(11) | 104.63(17) | C(31)-C(32)-C(33) | 121.6(3)   |
| C(2)-C(10)-C(11)  | 110.11(17) | C(8)-C(7)-C(6)    | 121.7(3)   |
| C(14)-C(10)-C(11) | 110.58(18) | C(30)-C(31)-C(32) | 121.7(3)   |
| C(5)-C(4)-C(9)    | 119.0(2)   | C(39)-C(40)-C(41) | 119.9(3)   |
| C(5)-C(4)-C(3)    | 134.3(2)   | C(42)-C(43)-C(44) | 120.8(3)   |
| C(9)-C(4)-C(3)    | 106.7(2)   | C(43)-C(42)-C(41) | 119.6(3)   |
| O(46)-C(38)-N(26) | 121.0(2)   | C(42)-C(41)-C(40) | 121.0(3)   |

**Table S25 Hydrogen Atom Coordinates ( $\text{\AA}\times 10^4$ ) and Isotropic Displacement Parameters ( $\text{\AA}^2\times 10^3$ ) for 2a.**

| Atom   | x         | y       | z       | U(eq) |
|--------|-----------|---------|---------|-------|
| H(20)  | 1 2 3 2 9 | 7 3 4 1 | 3 5 5 3 | 9 4   |
| H(45)  | 9 9 9 0   | 2 3 9 6 | 2 4 5 2 | 1 0 0 |
| H(19)  | 5 4 9 3   | 7 7 9 5 | 4 0 0 5 | 6 8   |
| H(11A) | 1 0 7 0 9 | 5 5 4 0 | 4 1 3 8 | 7 0   |

---

|        |       |      |      |     |
|--------|-------|------|------|-----|
| H(11B) | 9989  | 6025 | 4805 | 70  |
| H(36A) | 7024  | 2588 | 3962 | 72  |
| H(36B) | 6979  | 3535 | 3615 | 72  |
| H(12A) | 7240  | 5187 | 4674 | 73  |
| H(12B) | 6162  | 6168 | 4638 | 73  |
| H(37A) | 3245  | 2631 | 3818 | 76  |
| H(37B) | 3464  | 3410 | 4224 | 76  |
| H(33)  | -344  | 4813 | 2324 | 78  |
| H(18)  | 3828  | 8878 | 4700 | 81  |
| H(15)  | 11305 | 7673 | 4817 | 76  |
| H(17)  | 5872  | 9354 | 5445 | 86  |
| H(44)  | 9413  | 1174 | 3391 | 81  |
| H(5)   | 7533  | 7941 | 1308 | 84  |
| H(8)   | 4139  | 5672 | 2521 | 79  |
| H(30)  | 4900  | 4206 | 385  | 88  |
| H(16)  | 9638  | 8770 | 5483 | 89  |
| H(6)   | 4937  | 7326 | 839  | 97  |
| H(32)  | -1122 | 5386 | 1223 | 95  |
| H(7)   | 3245  | 6224 | 1434 | 93  |
| H(31)  | 1496  | 5118 | 285  | 97  |
| H(40)  | 3744  | 1940 | 2479 | 94  |
| H(43)  | 8711  | -238 | 3490 | 106 |
| H(42)  | 5559  | -560 | 3104 | 110 |
| H(41)  | 3087  | 517  | 2603 | 121 |
| H(24A) | 11678 | 9317 | 1260 | 176 |
| H(24B) | 12738 | 9086 | 1954 | 176 |
| H(24C) | 10518 | 9765 | 1917 | 176 |
| H(49A) | 10045 | 3178 | -310 | 185 |
| H(49B) | 10077 | 2265 | 97   | 185 |
| H(49C) | 11480 | 2926 | 310  | 185 |

---

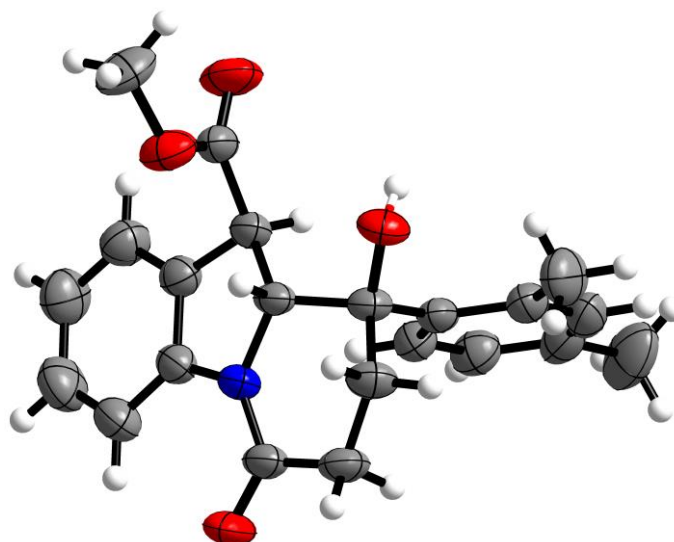

**Figure S26.** X-Ray crystal structure of **3k** (The crystal was obtained by slow evaporation of the solution of DCM and PE) (CCDC: 2271810)

**Table S26** Crystal data and structure refinement for **3k**.

|                                    |                                                 |
|------------------------------------|-------------------------------------------------|
| Identification code                | <b>3k</b>                                       |
| Empirical formula                  | C <sub>22</sub> H <sub>23</sub> NO <sub>4</sub> |
| Formula weight                     | 365.41                                          |
| Temperature/K                      | 278 K                                           |
| Crystal system                     | Orthorhombic                                    |
| Space group                        | Pna21                                           |
| a/Å                                | 27.5274(3)                                      |
| b/Å                                | 9.94060(10)                                     |
| c/Å                                | 27.6836(3)                                      |
| α/°                                | 90                                              |
| β/°                                | 90                                              |
| γ/°                                | 90                                              |
| Volume/Å <sup>3</sup>              | 7575.31(14)                                     |
| Z                                  | 16                                              |
| ρ <sub>calc</sub> /cm <sup>3</sup> | 1.282                                           |
| μ/mm <sup>-1</sup>                 | 0.714                                           |
| F(000)                             | 3104                                            |
| Crystal size/mm <sup>3</sup>       | 0.32 x 0.25 x 0.13                              |
| Radiation                          | CuKα (λ = 0.714)                                |
| 2θ range for data collection/°     | 6.38 to 156.24                                  |
| Index ranges                       | -34 ≤ h ≤ 34, -11 ≤ k ≤ 12, -35 ≤ l ≤ 35        |
| Reflections collected              | 97642                                           |

|                                             |                           |
|---------------------------------------------|---------------------------|
| Independent reflections                     | 15892 [R(int) = 0.0566]   |
| Data/restraints/parameters                  | 3017 / 0 / 238            |
| Goodness-of-fit on F2                       | 1.039                     |
| Final R indexes [I>>=2σ (I)]                | R1 = 0.0369, wR2 = 0.0978 |
| Final R indexes [all data]                  | R1 = 0.0409, wR2 = 0.1010 |
| Largest diff. peak/hole / e Å <sup>-3</sup> | 0.195 / -0.149            |

**Table S27 Fractional Atomic Coordinates ( $\times 10^4$ ) and Equivalent Isotropic Displacement Parameters ( $\text{\AA}^2 \times 10^3$ ) for 3k.  $U_{\text{eq}}$  is defined as 1/3 of the trace of the orthogonalised  $U_{\text{ij}}$  tensor.**

| Atom   | x       | y       | z       | U(eq)  |
|--------|---------|---------|---------|--------|
| O(22)  | 3974(1) | 2378(1) | 5420(1) | 51(1)  |
| O(53)  | 3253(1) | 2955(2) | 6059(1) | 61(1)  |
| O(54)  | 1330(1) | 4453(1) | 5950(1) | 54(1)  |
| O(25)  | 4079(1) | 5934(2) | 5231(1) | 65(1)  |
| O(80)  | 9676(1) | 2734(1) | 4078(1) | 60(1)  |
| N(82)  | 6257(1) | 3843(1) | 3584(1) | 41(1)  |
| N(28)  | 2533(1) | 3410(1) | 6408(1) | 39(1)  |
| O(103) | 5051(1) | 4880(1) | 4041(1) | 54(1)  |
| O(50)  | 1171(1) | 5009(2) | 7252(1) | 70(1)  |
| O(81)  | 7718(1) | 2297(2) | 4389(1) | 59(1)  |
| O(77)  | 7571(1) | 6487(2) | 4205(1) | 64(1)  |
| O(23)  | 5910(1) | 3103(2) | 5803(1) | 70(1)  |
| O(104) | 6986(1) | 3562(2) | 3929(1) | 75(1)  |
| N(1)   | 5140(1) | 3898(1) | 5789(1) | 45(1)  |
| O(106) | 4899(1) | 5277(2) | 2691(1) | 73(1)  |
| C(95)  | 5710(1) | 6418(2) | 4063(1) | 39(1)  |
| C(29)  | 2674(1) | 3284(2) | 6900(1) | 43(1)  |
| O(79)  | 7946(1) | 5581(2) | 4831(1) | 100(1) |
| C(36)  | 2825(1) | 3292(2) | 6017(1) | 44(1)  |
| C(68)  | 8108(1) | 1891(2) | 3600(1) | 44(1)  |
| C(90)  | 5729(1) | 4138(2) | 3600(1) | 38(1)  |
| O(27)  | 3615(1) | 6089(2) | 5878(1) | 81(1)  |
| N(55)  | 8930(1) | 3693(1) | 4102(1) | 45(1)  |

---

|        |         |         |         |       |
|--------|---------|---------|---------|-------|
| C(14)  | 4364(1) | 1718(2) | 6180(1) | 43(1) |
| C(32)  | 2008(1) | 3732(2) | 6390(1) | 39(1) |
| C(96)  | 5475(1) | 7334(2) | 4376(1) | 45(1) |
| O(108) | 4973(1) | 3144(2) | 2935(1) | 85(1) |
| C(46)  | 2400(1) | 6460(2) | 6168(1) | 44(1) |
| O(52)  | 1237(1) | 2851(2) | 7057(1) | 92(1) |
| C(83)  | 6398(1) | 3707(2) | 3091(1) | 44(1) |
| C(94)  | 5568(1) | 4933(2) | 4047(1) | 41(1) |
| C(35)  | 2611(1) | 3656(2) | 5535(1) | 50(1) |
| C(45)  | 2544(1) | 7793(2) | 6160(1) | 49(1) |
| C(33)  | 1846(1) | 4516(2) | 5940(1) | 40(1) |
| C(41)  | 1987(1) | 6003(2) | 5927(1) | 39(1) |
| C(88)  | 6032(1) | 4200(2) | 2798(1) | 46(1) |
| C(73)  | 8352(1) | 2573(2) | 3236(1) | 48(1) |
| C(24)  | 3971(1) | 5674(2) | 5686(1) | 48(1) |
| C(100) | 6082(1) | 6917(2) | 3770(1) | 41(1) |
| C(30)  | 2308(1) | 3804(2) | 7192(1) | 46(1) |
| C(15)  | 4585(1) | 2290(2) | 6586(1) | 48(1) |
| C(76)  | 7889(1) | 5668(2) | 4406(1) | 56(1) |
| C(91)  | 6552(1) | 3797(2) | 3972(1) | 48(1) |
| C(89)  | 5612(1) | 4724(2) | 3099(1) | 43(1) |
| C(19)  | 4094(1) | 528(2)  | 6256(1) | 52(1) |
| C(31)  | 1899(1) | 4354(2) | 6885(1) | 43(1) |
| C(9)   | 4618(1) | 3770(2) | 5649(1) | 41(1) |
| C(99)  | 6206(1) | 8256(2) | 3761(1) | 49(1) |
| C(7)   | 4771(1) | 5774(2) | 6101(1) | 46(1) |
| C(59)  | 8410(1) | 3630(2) | 4242(1) | 44(1) |
| C(98)  | 5962(1) | 9181(2) | 4047(1) | 52(1) |
| C(2)   | 5217(1) | 5170(2) | 6005(1) | 46(1) |
| C(93)  | 5779(1) | 4168(2) | 4481(1) | 52(1) |
| C(69)  | 7834(1) | 751(2)  | 3464(1) | 58(1) |
| C(63)  | 9235(1) | 2627(2) | 4137(1) | 46(1) |
| C(42)  | 1719(1) | 6958(2) | 5662(1) | 47(1) |

---

---

|        |         |         |         |       |
|--------|---------|---------|---------|-------|
| C(97)  | 5607(1) | 8686(2) | 4349(1) | 52(1) |
| C(87)  | 6088(1) | 4193(2) | 2302(1) | 62(1) |
| C(13)  | 4423(1) | 2329(2) | 5676(1) | 41(1) |
| C(60)  | 8168(1) | 2277(2) | 4135(1) | 44(1) |
| C(34)  | 2061(1) | 3758(2) | 5506(1) | 47(1) |
| C(105) | 5125(1) | 4268(2) | 2907(1) | 53(1) |
| C(10)  | 5474(1) | 2920(2) | 5721(1) | 49(1) |
| C(49)  | 1400(1) | 3958(2) | 7071(1) | 52(1) |
| C(84)  | 6825(1) | 3183(2) | 2902(1) | 60(1) |
| C(43)  | 1862(1) | 8299(2) | 5679(1) | 53(1) |
| C(40)  | 2363(1) | 3815(2) | 7686(1) | 61(1) |
| C(37)  | 3101(1) | 2776(2) | 7092(1) | 57(1) |
| C(18)  | 4058(1) | 13(2)   | 6721(1) | 61(1) |
| C(17)  | 4281(1) | 587(2)  | 7120(1) | 64(1) |
| C(6)   | 4752(1) | 7027(2) | 6308(1) | 60(1) |
| C(47)  | 1296(1) | 6628(3) | 5336(1) | 69(1) |
| C(72)  | 8347(1) | 2150(2) | 2758(1) | 61(1) |
| C(38)  | 3149(1) | 2807(3) | 7590(1) | 71(1) |
| C(16)  | 4544(1) | 1746(2) | 7044(1) | 58(1) |
| C(12)  | 4775(1) | 1500(2) | 5365(1) | 52(1) |
| C(8)   | 4355(1) | 4868(2) | 5946(1) | 43(1) |
| C(70)  | 7841(1) | 350(2)  | 2982(1) | 70(1) |
| C(44)  | 2271(1) | 8746(2) | 5923(1) | 52(1) |
| C(61)  | 8486(1) | 1236(2) | 4394(1) | 52(1) |
| C(58)  | 8179(1) | 4906(2) | 4029(1) | 47(1) |
| C(57)  | 8612(1) | 5727(2) | 3869(1) | 49(1) |
| C(3)   | 5650(1) | 5812(2) | 6122(1) | 61(1) |
| C(11)  | 5292(1) | 1562(2) | 5563(1) | 56(1) |
| C(71)  | 8097(1) | 1006(2) | 2625(1) | 67(1) |
| C(62)  | 9008(1) | 1275(2) | 4217(1) | 51(1) |
| C(86)  | 6513(1) | 3676(3) | 2107(1) | 73(1) |
| C(92)  | 6331(1) | 4094(2) | 4458(1) | 56(1) |
| C(56)  | 9042(1) | 4996(2) | 3931(1) | 49(1) |

---



|        |         |          |         |        |
|--------|---------|----------|---------|--------|
| C(39)  | 2790(1) | 3309(3)  | 7885(1) | 72(1)  |
| C(101) | 5089(1) | 6969(3)  | 4740(1) | 67(1)  |
| C(67)  | 8631(1) | 7017(2)  | 3682(1) | 62(1)  |
| C(65)  | 9499(1) | 6838(2)  | 3632(1) | 73(1)  |
| C(64)  | 9490(1) | 5541(2)  | 3812(1) | 64(1)  |
| C(85)  | 6872(1) | 3188(3)  | 2404(1) | 73(1)  |
| C(20)  | 3837(1) | -240(2)  | 5857(1) | 77(1)  |
| C(78)  | 7275(1) | 7234(3)  | 4539(1) | 75(1)  |
| C(66)  | 9079(1) | 7567(2)  | 3564(1) | 74(1)  |
| C(48)  | 2407(1) | 10208(2) | 5924(1) | 77(1)  |
| C(26)  | 3752(1) | 6850(3)  | 4985(1) | 74(1)  |
| C(74)  | 7528(1) | -65(3)   | 3804(1) | 87(1)  |
| C(102) | 6078(1) | 10653(2) | 4032(1) | 86(1)  |
| C(5)   | 5179(1) | 7685(2)  | 6420(1) | 72(1)  |
| C(21)  | 4244(1) | -48(3)   | 7615(1) | 98(1)  |
| C(4)   | 5621(1) | 7069(3)  | 6329(1) | 75(1)  |
| C(75)  | 8106(2) | 477(4)   | 2116(1) | 108(1) |
| C(107) | 4434(1) | 4976(4)  | 2474(1) | 108(1) |
| C(51)  | 692(1)  | 4797(4)  | 7445(1) | 100(1) |

**Table S28 Anisotropic Displacement Parameters ( $\text{\AA}^2 \times 10^3$ ) for 3k. The Anisotropic displacement factor exponent takes the form:  $2\pi^2[h^2a^{*2}U_{11}+2hka^*b^*U_{12}+\dots]$ .**

| Atom   | U11   | U22   | U33   | U23    | U13   | U12   |
|--------|-------|-------|-------|--------|-------|-------|
| O(22)  | 34(1) | 68(1) | 51(1) | -5(1)  | -7(1) | 6(1)  |
| O(53)  | 35(1) | 77(1) | 70(1) | -3(1)  | 6(1)  | 12(1) |
| O(54)  | 30(1) | 54(1) | 79(1) | 1(1)   | -8(1) | -7(1) |
| O(25)  | 61(1) | 76(1) | 58(1) | 11(1)  | -4(1) | 26(1) |
| O(80)  | 35(1) | 64(1) | 81(1) | 0(1)   | 3(1)  | 6(1)  |
| N(82)  | 34(1) | 37(1) | 52(1) | 2(1)   | -5(1) | 4(1)  |
| N(28)  | 31(1) | 39(1) | 47(1) | 0(1)   | 1(1)  | 3(1)  |
| O(103) | 32(1) | 50(1) | 79(1) | -4(1)  | 8(1)  | -7(1) |
| O(50)  | 48(1) | 77(1) | 85(1) | -12(1) | 21(1) | 3(1)  |

|        |        |        |        |        |        |        |
|--------|--------|--------|--------|--------|--------|--------|
| O(81)  | 36(1)  | 84(1)  | 57(1)  | 20(1)  | 4(1)   | 8(1)   |
| O(77)  | 62(1)  | 64(1)  | 65(1)  | 8(1)   | 9(1)   | 23(1)  |
| O(23)  | 31(1)  | 69(1)  | 110(1) | 3(1)   | -4(1)  | 9(1)   |
| O(104) | 42(1)  | 104(1) | 81(1)  | 8(1)   | -14(1) | 19(1)  |
| N(1)   | 30(1)  | 49(1)  | 55(1)  | 4(1)   | 3(1)   | 4(1)   |
| O(106) | 57(1)  | 75(1)  | 88(1)  | 4(1)   | -30(1) | 14(1)  |
| C(95)  | 31(1)  | 39(1)  | 46(1)  | 0(1)   | -4(1)  | -1(1)  |
| C(29)  | 42(1)  | 37(1)  | 51(1)  | 2(1)   | -3(1)  | -3(1)  |
| O(79)  | 116(2) | 131(2) | 53(1)  | -15(1) | -8(1)  | 65(1)  |
| C(36)  | 37(1)  | 40(1)  | 54(1)  | -4(1)  | 5(1)   | -1(1)  |
| C(68)  | 35(1)  | 42(1)  | 56(1)  | 7(1)   | -7(1)  | 1(1)   |
| C(90)  | 30(1)  | 33(1)  | 52(1)  | 1(1)   | -3(1)  | -1(1)  |
| O(27)  | 57(1)  | 91(1)  | 93(1)  | 11(1)  | 17(1)  | 37(1)  |
| N(55)  | 34(1)  | 47(1)  | 53(1)  | -2(1)  | -6(1)  | 1(1)   |
| C(14)  | 34(1)  | 40(1)  | 55(1)  | -2(1)  | 1(1)   | 7(1)   |
| C(32)  | 30(1)  | 36(1)  | 50(1)  | 1(1)   | 1(1)   | -3(1)  |
| C(96)  | 40(1)  | 48(1)  | 47(1)  | -6(1)  | -3(1)  | 4(1)   |
| O(108) | 72(1)  | 70(1)  | 113(2) | 5(1)   | -34(1) | -23(1) |
| C(46)  | 35(1)  | 38(1)  | 58(1)  | 5(1)   | -5(1)  | -2(1)  |
| O(52)  | 74(1)  | 66(1)  | 137(2) | 1(1)   | 41(1)  | -25(1) |
| C(83)  | 40(1)  | 39(1)  | 54(1)  | -2(1)  | 2(1)   | -3(1)  |
| C(94)  | 32(1)  | 40(1)  | 51(1)  | 2(1)   | 1(1)   | -4(1)  |
| C(35)  | 48(1)  | 53(1)  | 48(1)  | -3(1)  | 6(1)   | -1(1)  |
| C(45)  | 44(1)  | 41(1)  | 63(1)  | -1(1)  | 3(1)   | -7(1)  |
| C(33)  | 29(1)  | 40(1)  | 52(1)  | -2(1)  | -4(1)  | -3(1)  |
| C(41)  | 31(1)  | 39(1)  | 46(1)  | 2(1)   | 1(1)   | 0(1)   |
| C(88)  | 42(1)  | 44(1)  | 51(1)  | -1(1)  | -1(1)  | -6(1)  |
| C(73)  | 51(1)  | 46(1)  | 48(1)  | 3(1)   | -5(1)  | -4(1)  |
| C(24)  | 37(1)  | 42(1)  | 64(1)  | -1(1)  | 1(1)   | 5(1)   |
| C(100) | 36(1)  | 38(1)  | 50(1)  | -1(1)  | 0(1)   | -2(1)  |
| C(30)  | 46(1)  | 44(1)  | 47(1)  | 0(1)   | 1(1)   | -8(1)  |
| C(15)  | 47(1)  | 46(1)  | 51(1)  | 4(1)   | -3(1)  | 2(1)   |
| C(76)  | 52(1)  | 60(1)  | 55(1)  | -1(1)  | 0(1)   | 13(1)  |

|        |       |       |       |        |        |        |
|--------|-------|-------|-------|--------|--------|--------|
| C(91)  | 40(1) | 45(1) | 61(1) | 7(1)   | -10(1) | 4(1)   |
| C(89)  | 38(1) | 39(1) | 51(1) | 1(1)   | -7(1)  | 1(1)   |
| C(19)  | 43(1) | 42(1) | 72(1) | 0(1)   | 4(1)   | 3(1)   |
| C(31)  | 39(1) | 38(1) | 53(1) | 0(1)   | 7(1)   | -2(1)  |
| C(9)   | 30(1) | 47(1) | 45(1) | 4(1)   | 2(1)   | 8(1)   |
| C(99)  | 48(1) | 41(1) | 59(1) | 4(1)   | -1(1)  | -7(1)  |
| C(7)   | 45(1) | 47(1) | 47(1) | 4(1)   | 1(1)   | 4(1)   |
| C(59)  | 37(1) | 53(1) | 41(1) | 0(1)   | -3(1)  | 8(1)   |
| C(98)  | 54(1) | 38(1) | 65(1) | -2(1)  | -13(1) | 0(1)   |
| C(2)   | 39(1) | 51(1) | 48(1) | 7(1)   | 1(1)   | -1(1)  |
| C(93)  | 60(1) | 46(1) | 49(1) | 8(1)   | 4(1)   | -3(1)  |
| C(69)  | 45(1) | 47(1) | 80(1) | 4(1)   | -13(1) | -5(1)  |
| C(63)  | 35(1) | 56(1) | 46(1) | 0(1)   | -5(1)  | 6(1)   |
| C(42)  | 43(1) | 53(1) | 46(1) | 5(1)   | -1(1)  | 7(1)   |
| C(97)  | 53(1) | 44(1) | 58(1) | -11(1) | -7(1)  | 9(1)   |
| C(87)  | 66(1) | 68(1) | 53(1) | 0(1)   | -1(1)  | -9(1)  |
| C(13)  | 31(1) | 47(1) | 46(1) | -4(1)  | -3(1)  | 7(1)   |
| C(60)  | 33(1) | 51(1) | 49(1) | 10(1)  | 0(1)   | 3(1)   |
| C(34)  | 48(1) | 46(1) | 48(1) | -5(1)  | -7(1)  | -3(1)  |
| C(105) | 40(1) | 59(1) | 58(1) | -4(1)  | -9(1)  | 3(1)   |
| C(10)  | 34(1) | 56(1) | 58(1) | 7(1)   | 5(1)   | 11(1)  |
| C(49)  | 44(1) | 56(1) | 57(1) | 0(1)   | 9(1)   | -5(1)  |
| C(84)  | 47(1) | 60(1) | 73(1) | -5(1)  | 4(1)   | 5(1)   |
| C(43)  | 62(1) | 46(1) | 51(1) | 9(1)   | 4(1)   | 14(1)  |
| C(40)  | 66(1) | 68(1) | 48(1) | -3(1)  | 4(1)   | -11(1) |
| C(37)  | 51(1) | 55(1) | 66(1) | 6(1)   | -9(1)  | 5(1)   |
| C(18)  | 60(1) | 41(1) | 80(2) | 8(1)   | 17(1)  | 5(1)   |
| C(17)  | 71(1) | 54(1) | 67(1) | 17(1)  | 16(1)  | 18(1)  |
| C(6)   | 61(1) | 54(1) | 64(1) | -6(1)  | -3(1)  | 7(1)   |
| C(47)  | 64(1) | 73(1) | 70(1) | 7(1)   | -24(1) | 10(1)  |
| C(72)  | 75(1) | 58(1) | 50(1) | 2(1)   | -7(1)  | 3(1)   |
| C(38)  | 70(1) | 74(1) | 70(1) | 16(1)  | -24(1) | -3(1)  |
| C(16)  | 62(1) | 60(1) | 51(1) | 4(1)   | -2(1)  | 9(1)   |

|        |        |        |        |        |        |        |
|--------|--------|--------|--------|--------|--------|--------|
| C(12)  | 42(1)  | 59(1)  | 54(1)  | -10(1) | 1(1)   | 11(1)  |
| C(8)   | 35(1)  | 45(1)  | 50(1)  | 3(1)   | 5(1)   | 5(1)   |
| C(70)  | 65(1)  | 55(1)  | 89(2)  | -11(1) | -26(1) | -6(1)  |
| C(44)  | 65(1)  | 39(1)  | 54(1)  | 3(1)   | 14(1)  | -1(1)  |
| C(61)  | 39(1)  | 60(1)  | 56(1)  | 18(1)  | -4(1)  | 5(1)   |
| C(58)  | 44(1)  | 50(1)  | 45(1)  | -4(1)  | -7(1)  | 9(1)   |
| C(57)  | 58(1)  | 45(1)  | 44(1)  | -5(1)  | -6(1)  | 1(1)   |
| C(3)   | 43(1)  | 67(1)  | 73(1)  | 5(1)   | -1(1)  | -7(1)  |
| C(11)  | 39(1)  | 58(1)  | 69(1)  | -3(1)  | 3(1)   | 17(1)  |
| C(71)  | 79(1)  | 60(1)  | 63(1)  | -10(1) | -24(1) | 11(1)  |
| C(62)  | 40(1)  | 50(1)  | 63(1)  | 10(1)  | -3(1)  | 9(1)   |
| C(86)  | 76(1)  | 88(2)  | 56(1)  | -10(1) | 16(1)  | -11(1) |
| C(92)  | 60(1)  | 55(1)  | 52(1)  | 7(1)   | -14(1) | 3(1)   |
| C(56)  | 49(1)  | 51(1)  | 47(1)  | -7(1)  | -8(1)  | -5(1)  |
| C(39)  | 83(2)  | 81(2)  | 53(1)  | 12(1)  | -16(1) | -14(1) |
| C(101) | 65(1)  | 71(1)  | 66(1)  | -8(1)  | 18(1)  | 2(1)   |
| C(67)  | 81(1)  | 50(1)  | 56(1)  | -2(1)  | -3(1)  | 6(1)   |
| C(65)  | 76(1)  | 69(1)  | 75(2)  | 0(1)   | -5(1)  | -26(1) |
| C(64)  | 56(1)  | 66(1)  | 70(1)  | -1(1)  | -13(1) | -15(1) |
| C(85)  | 60(1)  | 83(2)  | 76(2)  | -16(1) | 21(1)  | 0(1)   |
| C(20)  | 77(1)  | 54(1)  | 98(2)  | -9(1)  | -7(1)  | -15(1) |
| C(78)  | 68(1)  | 73(1)  | 85(2)  | 7(1)   | 22(1)  | 26(1)  |
| C(66)  | 105(2) | 50(1)  | 67(1)  | 2(1)   | 1(1)   | -18(1) |
| C(48)  | 107(2) | 39(1)  | 86(2)  | 5(1)   | 18(1)  | -5(1)  |
| C(26)  | 84(2)  | 67(1)  | 71(1)  | 0(1)   | -27(1) | 25(1)  |
| C(74)  | 66(1)  | 72(2)  | 124(2) | 10(2)  | 2(1)   | -28(1) |
| C(102) | 105(2) | 39(1)  | 114(2) | -5(1)  | -1(2)  | -6(1)  |
| C(5)   | 76(1)  | 59(1)  | 82(2)  | -11(1) | -8(1)  | -8(1)  |
| C(21)  | 138(3) | 79(2)  | 76(2)  | 29(1)  | 28(2)  | 20(2)  |
| C(4)   | 63(1)  | 75(2)  | 87(2)  | 0(1)   | -10(1) | -21(1) |
| C(75)  | 148(3) | 99(2)  | 75(2)  | -29(2) | -43(2) | 21(2)  |
| C(107) | 71(2)  | 129(3) | 124(3) | -18(2) | -53(2) | 19(2)  |
| C(51)  | 58(1)  | 133(3) | 109(2) | 6(2)   | 33(2)  | 11(2)  |

**Table S29 Bond Lengths for 3k.**

| <b>Bond</b>   | <b>Angle/°</b> | <b>Bond</b>  | <b>Angle/°</b> |
|---------------|----------------|--------------|----------------|
| O(22)-C(13)   | 1.4275(19)     | C(88)-C(87)  | 1.382(3)       |
| O(53)-C(36)   | 1.230(2)       | C(88)-C(89)  | 1.518(2)       |
| O(54)-C(33)   | 1.4219(17)     | C(73)-C(72)  | 1.389(3)       |
| O(25)-C(24)   | 1.319(2)       | C(24)-C(8)   | 1.509(2)       |
| O(25)-C(26)   | 1.450(2)       | C(100)-C(99) | 1.375(2)       |
| O(80)-C(63)   | 1.232(2)       | C(30)-C(40)  | 1.377(3)       |
| N(82)-C(91)   | 1.350(2)       | C(30)-C(31)  | 1.514(3)       |
| N(82)-C(83)   | 1.425(2)       | C(15)-C(16)  | 1.384(3)       |
| N(82)-C(90)   | 1.4814(18)     | C(76)-C(58)  | 1.518(3)       |
| N(28)-C(36)   | 1.355(2)       | C(91)-C(92)  | 1.506(3)       |
| N(28)-C(29)   | 1.420(2)       | C(89)-C(105) | 1.513(2)       |
| N(28)-C(32)   | 1.4814(18)     | C(19)-C(18)  | 1.389(3)       |
| O(103)-C(94)  | 1.4240(18)     | C(19)-C(20)  | 1.518(3)       |
| O(50)-C(49)   | 1.319(2)       | C(31)-C(49)  | 1.518(2)       |
| O(50)-C(51)   | 1.438(3)       | C(9)-C(13)   | 1.533(2)       |
| O(81)-C(60)   | 1.423(2)       | C(9)-C(8)    | 1.546(2)       |
| O(77)-C(76)   | 1.319(2)       | C(99)-C(98)  | 1.386(3)       |
| O(77)-C(78)   | 1.440(3)       | C(7)-C(6)    | 1.372(3)       |
| O(23)-C(10)   | 1.232(2)       | C(7)-C(2)    | 1.392(2)       |
| O(104)-C(91)  | 1.222(2)       | C(7)-C(8)    | 1.520(2)       |
| N(1)-C(10)    | 1.351(2)       | C(59)-C(60)  | 1.531(3)       |
| N(1)-C(2)     | 1.415(2)       | C(59)-C(58)  | 1.537(2)       |
| N(1)-C(9)     | 1.4934(19)     | C(98)-C(97)  | 1.378(3)       |
| O(106)-C(105) | 1.323(3)       | C(98)-C(102) | 1.498(3)       |
| O(106)-C(107) | 1.446(3)       | C(2)-C(3)    | 1.390(3)       |
| C(95)-C(100)  | 1.397(2)       | C(93)-C(92)  | 1.524(3)       |
| C(95)-C(96)   | 1.413(2)       | C(69)-C(70)  | 1.394(4)       |
| C(95)-C(94)   | 1.527(2)       | C(69)-C(74)  | 1.501(3)       |
| C(29)-C(37)   | 1.386(3)       | C(63)-C(62)  | 1.498(3)       |

|               |          |             |          |
|---------------|----------|-------------|----------|
| C(29)-C(30)   | 1.389(2) | C(42)-C(43) | 1.391(3) |
| O(79)-C(76)   | 1.190(3) | C(42)-C(47) | 1.508(3) |
| C(36)-C(35)   | 1.503(3) | C(87)-C(86) | 1.386(3) |
| C(68)-C(73)   | 1.388(3) | C(13)-C(12) | 1.535(2) |
| C(68)-C(69)   | 1.412(3) | C(60)-C(61) | 1.534(2) |
| C(68)-C(60)   | 1.538(3) | C(10)-C(11) | 1.505(3) |
| C(90)-C(94)   | 1.534(2) | C(84)-C(85) | 1.385(4) |
| C(90)-C(89)   | 1.539(2) | C(43)-C(44) | 1.385(3) |
| O(27)-C(24)   | 1.188(2) | C(40)-C(39) | 1.390(3) |
| N(55)-C(63)   | 1.355(2) | C(37)-C(38) | 1.386(3) |
| N(55)-C(56)   | 1.413(2) | C(18)-C(17) | 1.385(4) |
| N(55)-C(59)   | 1.484(2) | C(17)-C(16) | 1.376(3) |
| C(14)-C(15)   | 1.399(3) | C(17)-C(21) | 1.513(3) |
| C(14)-C(19)   | 1.412(2) | C(6)-C(5)   | 1.381(3) |
| C(14)-C(13)   | 1.530(3) | C(72)-C(71) | 1.378(3) |
| C(32)-C(31)   | 1.533(2) | C(38)-C(39) | 1.376(4) |
| C(32)-C(33)   | 1.534(2) | C(12)-C(11) | 1.527(3) |
| C(96)-C(97)   | 1.394(3) | C(70)-C(71) | 1.378(4) |
| C(96)-C(101)  | 1.509(3) | C(44)-C(48) | 1.500(3) |
| O(108)-C(105) | 1.196(3) | C(61)-C(62) | 1.519(2) |
| C(46)-C(45)   | 1.384(2) | C(58)-C(57) | 1.512(3) |
| C(46)-C(41)   | 1.393(2) | C(57)-C(67) | 1.384(3) |
| O(52)-C(49)   | 1.189(3) | C(57)-C(56) | 1.398(3) |
| C(83)-C(88)   | 1.384(3) | C(3)-C(4)   | 1.376(4) |
| C(83)-C(84)   | 1.388(3) | C(71)-C(75) | 1.506(4) |
| C(94)-C(93)   | 1.537(3) | C(86)-C(85) | 1.376(4) |
| C(35)-C(34)   | 1.519(2) | C(56)-C(64) | 1.387(3) |
| C(45)-C(44)   | 1.377(3) | C(67)-C(66) | 1.390(4) |
| C(33)-C(41)   | 1.529(2) | C(65)-C(66) | 1.378(4) |
| C(33)-C(34)   | 1.538(2) | C(65)-C(64) | 1.381(3) |
| C(41)-C(42)   | 1.410(2) | C(5)-C(4)   | 1.385(4) |

**Table S30 Bond Angles for 3k.**

| <b>Bond</b>          | <b>Angle/°</b> | <b>Bond</b>        | <b>Angle/°</b> |
|----------------------|----------------|--------------------|----------------|
| C(24)-O(25)-C(26)    | 115.58(16)     | C(6)-C(7)-C(2)     | 120.43(18)     |
| C(91)-N(82)-C(83)    | 126.43(14)     | C(6)-C(7)-C(8)     | 128.78(17)     |
| C(91)-N(82)-C(90)    | 125.00(15)     | C(2)-C(7)-C(8)     | 110.79(15)     |
| C(83)-N(82)-C(90)    | 108.46(13)     | N(55)-C(59)-C(60)  | 114.02(14)     |
| C(36)-N(28)-C(29)    | 126.72(13)     | N(55)-C(59)-C(58)  | 105.28(14)     |
| C(36)-N(28)-C(32)    | 124.69(14)     | C(60)-C(59)-C(58)  | 118.02(14)     |
| C(29)-N(28)-C(32)    | 108.57(13)     | C(97)-C(98)-C(99)  | 116.92(16)     |
| C(49)-O(50)-C(51)    | 117.6(2)       | C(97)-C(98)-C(102) | 121.1(2)       |
| C(76)-O(77)-C(78)    | 114.96(18)     | C(99)-C(98)-C(102) | 121.9(2)       |
| C(10)-N(1)-C(2)      | 126.92(15)     | C(3)-C(2)-C(7)     | 120.86(18)     |
| C(10)-N(1)-C(9)      | 123.91(15)     | C(3)-C(2)-N(1)     | 129.54(17)     |
| C(2)-N(1)-C(9)       | 109.16(13)     | C(7)-C(2)-N(1)     | 109.60(14)     |
| C(105)-O(106)-C(107) | 116.6(2)       | C(92)-C(93)-C(94)  | 111.65(15)     |
| C(100)-C(95)-C(96)   | 117.52(14)     | C(70)-C(69)-C(68)  | 118.5(2)       |
| C(100)-C(95)-C(94)   | 120.95(14)     | C(70)-C(69)-C(74)  | 117.0(2)       |
| C(96)-C(95)-C(94)    | 121.54(15)     | C(68)-C(69)-C(74)  | 124.5(2)       |
| C(37)-C(29)-C(30)    | 121.85(18)     | O(80)-C(63)-N(55)  | 122.27(17)     |
| C(37)-C(29)-N(28)    | 129.02(17)     | O(80)-C(63)-C(62)  | 120.56(16)     |
| C(30)-C(29)-N(28)    | 109.10(14)     | N(55)-C(63)-C(62)  | 117.04(14)     |
| O(53)-C(36)-N(28)    | 121.01(17)     | C(43)-C(42)-C(41)  | 118.54(16)     |
| O(53)-C(36)-C(35)    | 121.73(16)     | C(43)-C(42)-C(47)  | 116.66(17)     |
| N(28)-C(36)-C(35)    | 117.20(14)     | C(41)-C(42)-C(47)  | 124.73(17)     |
| C(73)-C(68)-C(69)    | 117.18(18)     | C(98)-C(97)-C(96)  | 124.16(17)     |
| C(73)-C(68)-C(60)    | 121.73(15)     | C(88)-C(87)-C(86)  | 118.8(2)       |
| C(69)-C(68)-C(60)    | 120.87(17)     | O(22)-C(13)-C(14)  | 112.00(13)     |
| N(82)-C(90)-C(94)    | 114.25(13)     | O(22)-C(13)-C(9)   | 104.32(13)     |
| N(82)-C(90)-C(89)    | 104.61(13)     | C(14)-C(13)-C(9)   | 116.92(14)     |
| C(94)-C(90)-C(89)    | 118.15(13)     | O(22)-C(13)-C(12)  | 106.62(13)     |
| C(63)-N(55)-C(56)    | 127.31(15)     | C(14)-C(13)-C(12)  | 111.48(14)     |
| C(63)-N(55)-C(59)    | 123.00(15)     | C(9)-C(13)-C(12)   | 104.67(14)     |
| C(56)-N(55)-C(59)    | 109.68(13)     | O(81)-C(60)-C(59)  | 105.71(14)     |
| C(15)-C(14)-C(19)    | 116.71(18)     | O(81)-C(60)-C(61)  | 105.96(13)     |

---

|                    |            |                      |            |
|--------------------|------------|----------------------|------------|
| C(15)-C(14)-C(13)  | 121.59(15) | C(59)-C(60)-C(61)    | 104.62(14) |
| C(19)-C(14)-C(13)  | 121.67(16) | O(81)-C(60)-C(68)    | 112.71(14) |
| N(28)-C(32)-C(31)  | 104.31(12) | C(59)-C(60)-C(68)    | 116.92(14) |
| N(28)-C(32)-C(33)  | 115.02(13) | C(61)-C(60)-C(68)    | 110.08(15) |
| C(31)-C(32)-C(33)  | 117.55(13) | C(35)-C(34)-C(33)    | 112.06(14) |
| C(97)-C(96)-C(95)  | 118.03(16) | O(108)-C(105)-O(106) | 125.01(18) |
| C(97)-C(96)-C(101) | 116.78(17) | O(108)-C(105)-C(89)  | 124.51(18) |
| C(95)-C(96)-C(101) | 125.19(17) | O(106)-C(105)-C(89)  | 110.45(17) |
| C(45)-C(46)-C(41)  | 122.60(16) | O(23)-C(10)-N(1)     | 122.00(18) |
| C(88)-C(83)-C(84)  | 121.83(18) | O(23)-C(10)-C(11)    | 120.61(16) |
| C(88)-C(83)-N(82)  | 109.18(14) | N(1)-C(10)-C(11)     | 117.31(15) |
| C(84)-C(83)-N(82)  | 128.99(17) | O(52)-C(49)-O(50)    | 124.37(18) |
| O(103)-C(94)-C(95) | 107.01(12) | O(52)-C(49)-C(31)    | 124.78(18) |
| O(103)-C(94)-C(90) | 105.09(13) | O(50)-C(49)-C(31)    | 110.85(16) |
| C(95)-C(94)-C(90)  | 116.52(13) | C(85)-C(84)-C(83)    | 117.0(2)   |
| O(103)-C(94)-C(93) | 111.70(14) | C(44)-C(43)-C(42)    | 123.76(16) |
| C(95)-C(94)-C(93)  | 111.00(14) | C(30)-C(40)-C(39)    | 118.8(2)   |
| C(90)-C(94)-C(93)  | 105.45(13) | C(29)-C(37)-C(38)    | 116.9(2)   |
| C(36)-C(35)-C(34)  | 116.97(15) | C(17)-C(18)-C(19)    | 123.64(19) |
| C(44)-C(45)-C(46)  | 120.61(17) | C(16)-C(17)-C(18)    | 117.2(2)   |
| O(54)-C(33)-C(41)  | 107.26(12) | C(16)-C(17)-C(21)    | 121.6(3)   |
| O(54)-C(33)-C(32)  | 104.70(13) | C(18)-C(17)-C(21)    | 121.3(2)   |
| C(41)-C(33)-C(32)  | 115.86(13) | C(7)-C(6)-C(5)       | 119.3(2)   |
| O(54)-C(33)-C(34)  | 112.21(13) | C(71)-C(72)-C(73)    | 120.5(2)   |
| C(41)-C(33)-C(34)  | 110.94(14) | C(39)-C(38)-C(37)    | 122.0(2)   |
| C(32)-C(33)-C(34)  | 105.82(13) | C(17)-C(16)-C(15)    | 120.7(2)   |
| C(46)-C(41)-C(42)  | 117.25(15) | C(11)-C(12)-C(13)    | 111.45(15) |
| C(46)-C(41)-C(33)  | 120.72(14) | C(24)-C(8)-C(7)      | 110.39(14) |
| C(42)-C(41)-C(33)  | 122.00(14) | C(24)-C(8)-C(9)      | 116.77(15) |
| C(87)-C(88)-C(83)  | 120.07(18) | C(7)-C(8)-C(9)       | 102.37(12) |
| C(87)-C(88)-C(89)  | 129.18(18) | C(71)-C(70)-C(69)    | 123.88(19) |
| C(83)-C(88)-C(89)  | 110.72(16) | C(45)-C(44)-C(43)    | 117.09(16) |
| C(68)-C(73)-C(72)  | 122.70(18) | C(45)-C(44)-C(48)    | 121.9(2)   |

---



|                    |            |                   |            |
|--------------------|------------|-------------------|------------|
| O(27)-C(24)-O(25)  | 122.93(17) | C(43)-C(44)-C(48) | 121.02(19) |
| O(27)-C(24)-C(8)   | 123.32(19) | C(62)-C(61)-C(60) | 111.83(14) |
| O(25)-C(24)-C(8)   | 113.67(14) | C(57)-C(58)-C(76) | 110.33(15) |
| C(99)-C(100)-C(95) | 122.42(16) | C(57)-C(58)-C(59) | 103.35(14) |
| C(40)-C(30)-C(29)  | 120.10(18) | C(76)-C(58)-C(59) | 111.39(15) |
| C(40)-C(30)-C(31)  | 129.54(18) | C(67)-C(57)-C(56) | 119.79(19) |
| C(29)-C(30)-C(31)  | 110.29(15) | C(67)-C(57)-C(58) | 129.64(18) |
| C(16)-C(15)-C(14)  | 122.75(18) | C(56)-C(57)-C(58) | 110.57(16) |
| O(79)-C(76)-O(77)  | 123.41(19) | C(4)-C(3)-C(2)    | 117.6(2)   |
| O(79)-C(76)-C(58)  | 125.09(18) | C(10)-C(11)-C(12) | 116.78(15) |
| O(77)-C(76)-C(58)  | 111.47(17) | C(70)-C(71)-C(72) | 117.2(2)   |
| O(104)-C(91)-N(82) | 121.14(19) | C(70)-C(71)-C(75) | 120.9(2)   |
| O(104)-C(91)-C(92) | 121.34(17) | C(72)-C(71)-C(75) | 121.9(3)   |
| N(82)-C(91)-C(92)  | 117.49(15) | C(63)-C(62)-C(61) | 117.69(15) |
| C(105)-C(89)-C(88) | 112.30(15) | C(85)-C(86)-C(87) | 120.3(2)   |
| C(105)-C(89)-C(90) | 112.93(14) | C(91)-C(92)-C(93) | 116.75(16) |
| C(88)-C(89)-C(90)  | 101.88(13) | C(64)-C(56)-C(57) | 121.31(19) |
| C(18)-C(19)-C(14)  | 119.03(19) | C(64)-C(56)-N(55) | 129.18(18) |
| C(18)-C(19)-C(20)  | 117.10(19) | C(57)-C(56)-N(55) | 109.45(15) |
| C(14)-C(19)-C(20)  | 123.9(2)   | C(38)-C(39)-C(40) | 120.3(2)   |
| C(30)-C(31)-C(49)  | 112.85(15) | C(57)-C(67)-C(66) | 119.0(2)   |
| C(30)-C(31)-C(32)  | 102.13(13) | C(66)-C(65)-C(64) | 121.7(2)   |
| C(49)-C(31)-C(32)  | 112.14(14) | C(65)-C(64)-C(56) | 117.8(2)   |
| N(1)-C(9)-C(13)    | 113.83(12) | C(86)-C(85)-C(84) | 121.9(2)   |
| N(1)-C(9)-C(8)     | 104.74(13) | C(65)-C(66)-C(67) | 120.4(2)   |
| C(13)-C(9)-C(8)    | 118.00(13) | C(6)-C(5)-C(4)    | 119.9(2)   |
| C(100)-C(99)-C(98) | 120.82(17) | C(3)-C(4)-C(5)    | 121.9(2)   |

**Table S31 Hydrogen Atom Coordinates ( $\text{\AA}\times 10^4$ ) and Isotropic Displacement Parameters ( $\text{\AA}^2\times 10^3$ ) for 3k.**

| Atom  | x    | y    | z    | U(eq) |
|-------|------|------|------|-------|
| H(22) | 3756 | 2616 | 5603 | 76    |
| H(54) | 1242 | 3671 | 5914 | 81    |

---

|        |      |      |      |     |
|--------|------|------|------|-----|
| H(103) | 4962 | 4097 | 4070 | 81  |
| H(81)  | 7516 | 2717 | 4231 | 88  |
| H(90)  | 5564 | 3267 | 3618 | 46  |
| H(32)  | 1836 | 2869 | 6380 | 46  |
| H(46)  | 2585 | 5844 | 6342 | 53  |
| H(35A) | 2717 | 2990 | 5301 | 60  |
| H(35B) | 2746 | 4514 | 5436 | 60  |
| H(45)  | 2829 | 8047 | 6317 | 59  |
| H(73)  | 8525 | 3344 | 3315 | 58  |
| H(100) | 6251 | 6322 | 3573 | 50  |
| H(15)  | 4769 | 3068 | 6546 | 57  |
| H(89)  | 5623 | 5709 | 3112 | 51  |
| H(31)  | 1923 | 5336 | 6865 | 52  |
| H(9)   | 4596 | 4044 | 5310 | 49  |
| H(99)  | 6457 | 8545 | 3562 | 59  |
| H(59)  | 8401 | 3739 | 4594 | 52  |
| H(93A) | 5683 | 4617 | 4778 | 62  |
| H(93B) | 5647 | 3264 | 4488 | 62  |
| H(97)  | 5445 | 9292 | 4548 | 62  |
| H(87)  | 5844 | 4528 | 2102 | 74  |
| H(34A) | 1924 | 2860 | 5494 | 57  |
| H(34B) | 1972 | 4220 | 5211 | 57  |
| H(84)  | 7069 | 2845 | 3100 | 72  |
| H(43)  | 1673 | 8931 | 5518 | 63  |
| H(40)  | 2119 | 4156 | 7884 | 73  |
| H(37)  | 3345 | 2430 | 6895 | 68  |
| H(18)  | 3875 | -762 | 6768 | 73  |
| H(6)   | 4454 | 7429 | 6373 | 72  |
| H(47A) | 1024 | 6346 | 5529 | 103 |
| H(47B) | 1386 | 5917 | 5120 | 103 |
| H(47C) | 1208 | 7412 | 5153 | 103 |
| H(72)  | 8514 | 2642 | 2525 | 73  |
| H(38)  | 3432 | 2479 | 7729 | 85  |

---

|        |      |       |      |     |
|--------|------|-------|------|-----|
| H(16)  | 4695 | 2168  | 7303 | 69  |
| H(12A) | 4667 | 572   | 5357 | 62  |
| H(12B) | 4771 | 1842  | 5037 | 62  |
| H(8)   | 4210 | 4454  | 6233 | 52  |
| H(70)  | 7661 | -405  | 2895 | 84  |
| H(61A) | 8480 | 1411  | 4739 | 62  |
| H(61B) | 8353 | 345   | 4340 | 62  |
| H(58)  | 7973 | 4680  | 3751 | 56  |
| H(3)   | 5949 | 5406  | 6063 | 73  |
| H(11A) | 5313 | 956   | 5837 | 67  |
| H(11B) | 5510 | 1221  | 5316 | 67  |
| H(62A) | 9206 | 792   | 4448 | 61  |
| H(62B) | 9023 | 783   | 3915 | 61  |
| H(86)  | 6554 | 3660  | 1773 | 88  |
| H(92A) | 6461 | 4945  | 4571 | 67  |
| H(92B) | 6439 | 3405  | 4682 | 67  |
| H(39)  | 2832 | 3310  | 8218 | 87  |
| H(10A) | 4820 | 6553  | 4577 | 101 |
| H(10B) | 4980 | 7767  | 4902 | 101 |
| H(10C) | 5221 | 6353  | 4972 | 101 |
| H(67)  | 8347 | 7508  | 3635 | 75  |
| H(65)  | 9797 | 7228  | 3556 | 88  |
| H(64)  | 9775 | 5051  | 3852 | 77  |
| H(85)  | 7155 | 2850  | 2266 | 87  |
| H(20A) | 4073 | -596  | 5636 | 115 |
| H(20B) | 3622 | 355   | 5688 | 115 |
| H(20C) | 3654 | -966  | 5995 | 115 |
| H(78A) | 7033 | 7731  | 4365 | 113 |
| H(78B) | 7475 | 7846  | 4718 | 113 |
| H(78C) | 7118 | 6622  | 4758 | 113 |
| H(66)  | 9096 | 8433  | 3437 | 88  |
| H(48A) | 2628 | 10380 | 6185 | 116 |
| H(48B) | 2120 | 10745 | 5965 | 116 |

|        |      |       |      |     |
|--------|------|-------|------|-----|
| H(48C) | 2560 | 10433 | 5623 | 116 |
| H(26A) | 3786 | 6741  | 4642 | 111 |
| H(26B) | 3829 | 7759  | 5073 | 111 |
| H(26C) | 3423 | 6655  | 5078 | 111 |
| H(74A) | 7412 | -855  | 3641 | 131 |
| H(74B) | 7256 | 464   | 3910 | 131 |
| H(74C) | 7719 | -325  | 4078 | 131 |
| H(10D) | 6350 | 10835 | 4238 | 129 |
| H(10E) | 5801 | 11158 | 4141 | 129 |
| H(10F) | 6155 | 10909 | 3706 | 129 |
| H(5)   | 5170 | 8540  | 6555 | 87  |
| H(21A) | 3912 | -299  | 7676 | 147 |
| H(21B) | 4348 | 585   | 7855 | 147 |
| H(21C) | 4446 | -834  | 7628 | 147 |
| H(4)   | 5906 | 7517  | 6410 | 90  |
| H(75A) | 8190 | 1192  | 1898 | 161 |
| H(75B) | 7791 | 130   | 2034 | 161 |
| H(75C) | 8343 | -228  | 2091 | 161 |
| H(10G) | 4478 | 4349  | 2214 | 162 |
| H(10H) | 4291 | 5789  | 2351 | 162 |
| H(10I) | 4222 | 4590  | 2712 | 162 |
| H(51A) | 486  | 4435  | 7198 | 151 |
| H(51B) | 562  | 5639  | 7556 | 151 |
| H(51C) | 709  | 4177  | 7710 | 151 |

## 7. References

- [1] Jefferies, L. R.; Cook, S. P. *Org. Lett.* **2014**, *16*, 2026.
- [2] Umehara, A.; Ueda, H.; Tokuyama, H. *J. Org. Chem.* **2016**, *81*, 11444.
- [3] Singathi, R.; Raghunathan, R.; Krishnan, R.; Kumar Rajendran, S.; Baburaj, S.; Sibi, M. P.; Webster, D. C.; Sivaguru, J. *Angew. Chem. Int. Ed.* **2022**, *61*, e202203353.
- [4] Gao, R.; An, B.; Zhou, C.; Zhang, X. *Molecules* **2022**, *27*, 8722.
- [5] Deng, T.; Yan, W.; Liu, X.; Hu, G.; Xiao, W.; Mao, S.; Lin, J.; Jiao, Y.; Jin, Y. *Org. Lett.* **2022**, *24*, 1502.

- [6] Kulshreshtha, C.; Kim, G. W.; Lampande, R.; Huh, D. H.; Chae, M.; Kwon, J. H. *J. Mater. Chem. A* **2013**, *1*, 4077.
- [7] Gaussian 16, Revision A.03, Frisch, M. J.; Trucks, G. W.; Schlegel, H. B.; Scuseria, G. E.; Robb, M. A.; Cheeseman, J. R.; Scalmani, G.; Barone, V.; Petersson, G. A.; Nakatsuji, H.; Li, X.; Car-icato, M.; Marenich, A. V.; Bloino, J.; Janesko, B. G.; Gomperts, R.; Mennucci, B.; Hratchian, H. P.; Ortiz, J. V.; Izmaylov, A. F.; Sonnenberg, J. L.; Williams-Young, D.; Ding, F.; Lipparini, F.; Egidi, F.; Goings, J.; Peng, B.; Petrone, A.; Henderson, T.; Ranasinghe, D.; Zakrzewski, V. G.; Gao, J.; Rega, N.; Zheng, G.; Liang, W.; Hada, M.; Ehara, M.; Toyota, K.; Fukuda, R.; Hasegawa, J.; Ishida, M.; Nakajima, T.; Honda, Y.; Kitao, O.; Nakai, H.; Vreven, T.; Throssell, K.; Montgomery, J. A. Jr.; Peralta, J. E.; Ogliaro, F.; Bearpark, M. J.; Heyd, J. J.; Brothers, E. N.; Kudin, K. N.; Staroverov, V. N.; Keith, T. A.; Kobayashi, R.; Normand, J.; Raghavachari, K.; Rendell, A. P.; Burant, J. C.; Iyengar, S. S.; Tomasi, J.; Cossi, M.; Millam, J. M.; Klene, M.; Adamo, C.; Cammi, R.; Ochterski, J. W.; Martin, R. L.; Morokuma, K.; Farkas, O.; Foresman, J. B.; Fox, D. J. Gaussian, Inc., Wallingford CT, **2016**.
- [8] (a) Becke, A. D. *J. Chem. Phys.* **1993**, *98*, 5648. (b) Lee, C.; Yang, W.; Parr, R. G. *Phys. Rev. B: Condens. Matter Mater. Phys.* **1988**, *37*, 785. (c) Stephens, P. J.; Devlin, F. J.; Chabalowski, C. F.; Frisch, M. J. *J. Phys. Chem.* **1994**, *98*, 11623.
- [9] Grimme, S.; Antony, J.; Ehrlich, S.; Krieg, H. *J. Chem. Phys.* **2010**, *132*, 154104.
- [10] Grimme, S.; Ehrlich, S.; Goerigk, L. *J. Comp. Chem.* **2011**, *32*, 1456.
- [11] (a) Weigend, F.; Ahlrichs, R. *Phys. Chem. Chem. Phys.* **2005**, *7*, 3297. (b) Weigend, F. *Phys. Chem. Chem. Phys.* **2006**, *8*, 1057.
- [12] Scalmani, G.; Frisch, M. J. *J. Chem. Phys.* **2010**, *132*, 114110.
- [13] Lu, T.; Chen, F. *J. Comput. Chem.* **2012**, *33*, 580.
- [14] Humphrey, W.; Dalke, A.; Schulten, K. *J. Molec. Graphics* **1996**, *14*, 33.

## 8. Copies of NMR spectra

### <sup>1</sup>H NMR Spectrum of ITN-1

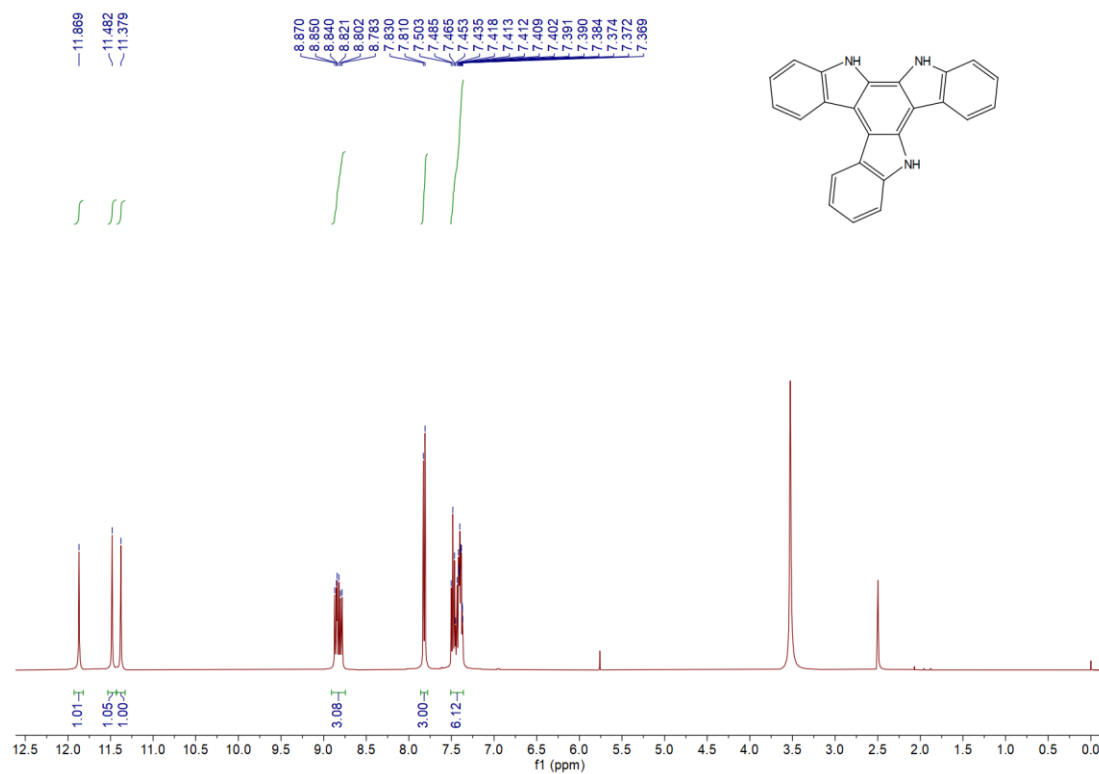

### <sup>1</sup>H NMR Spectrum of ITN-2

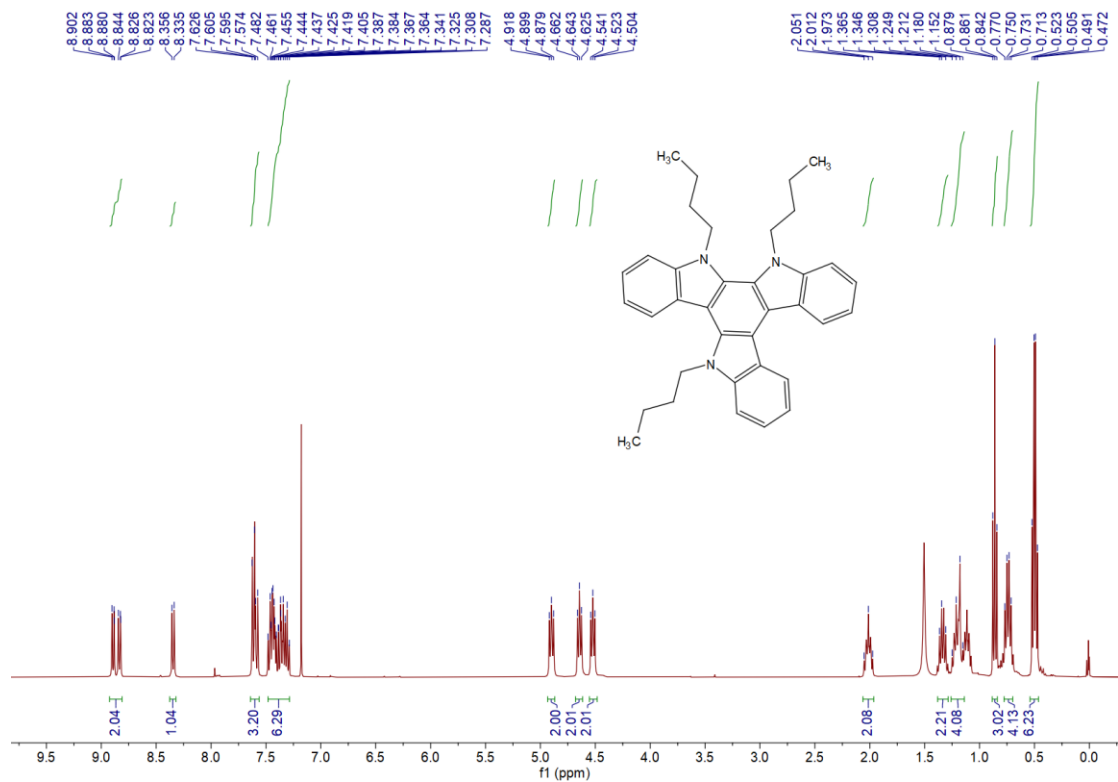

# <sup>1</sup>H NMR Spectrum of ITN-3

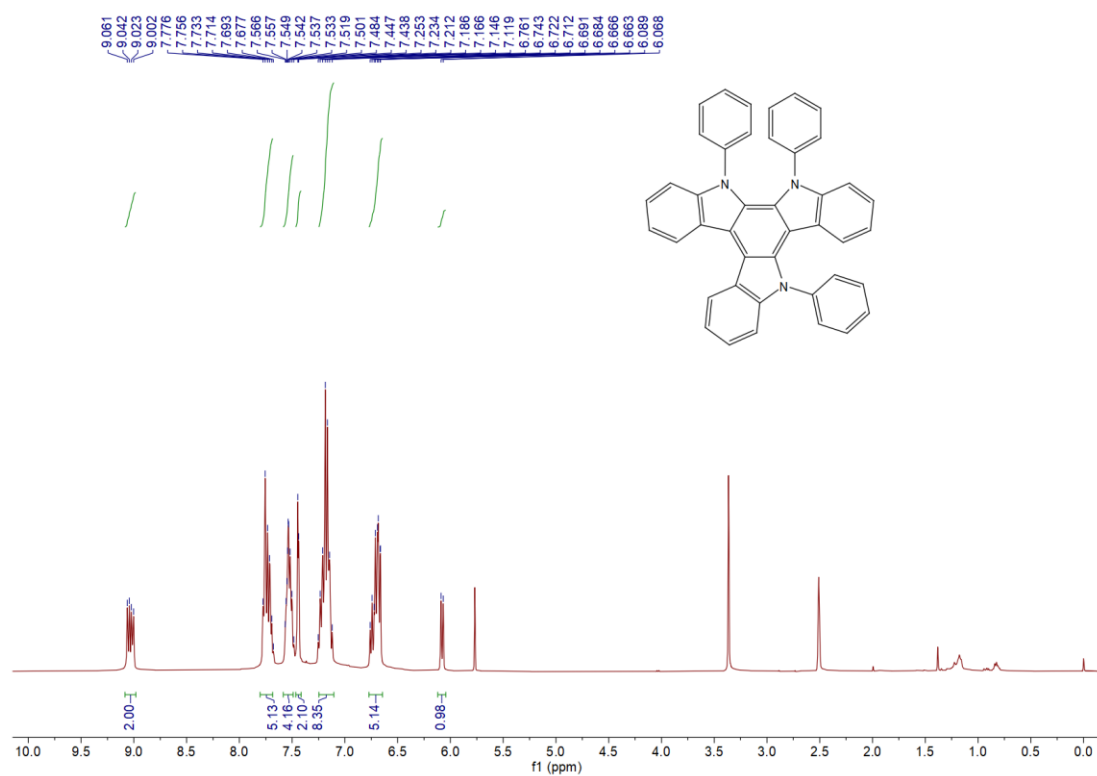

# <sup>1</sup>H NMR Spectrum of 1a

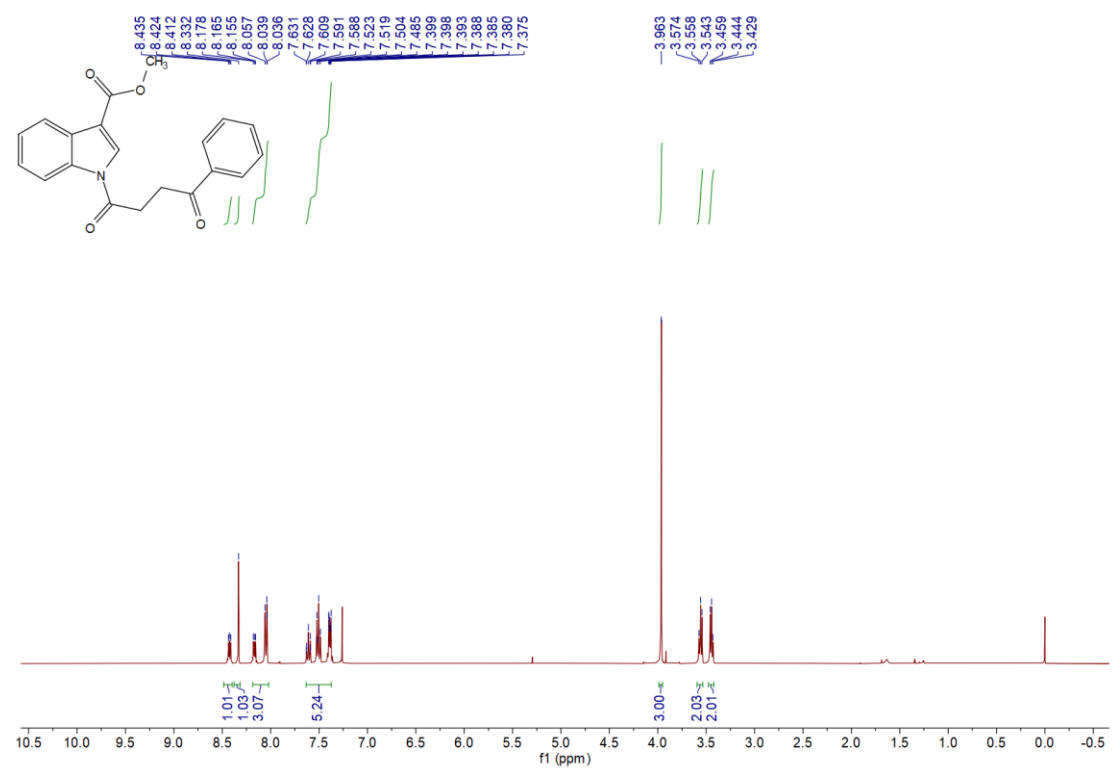

### <sup>13</sup>C NMR Spectrum of **1a**

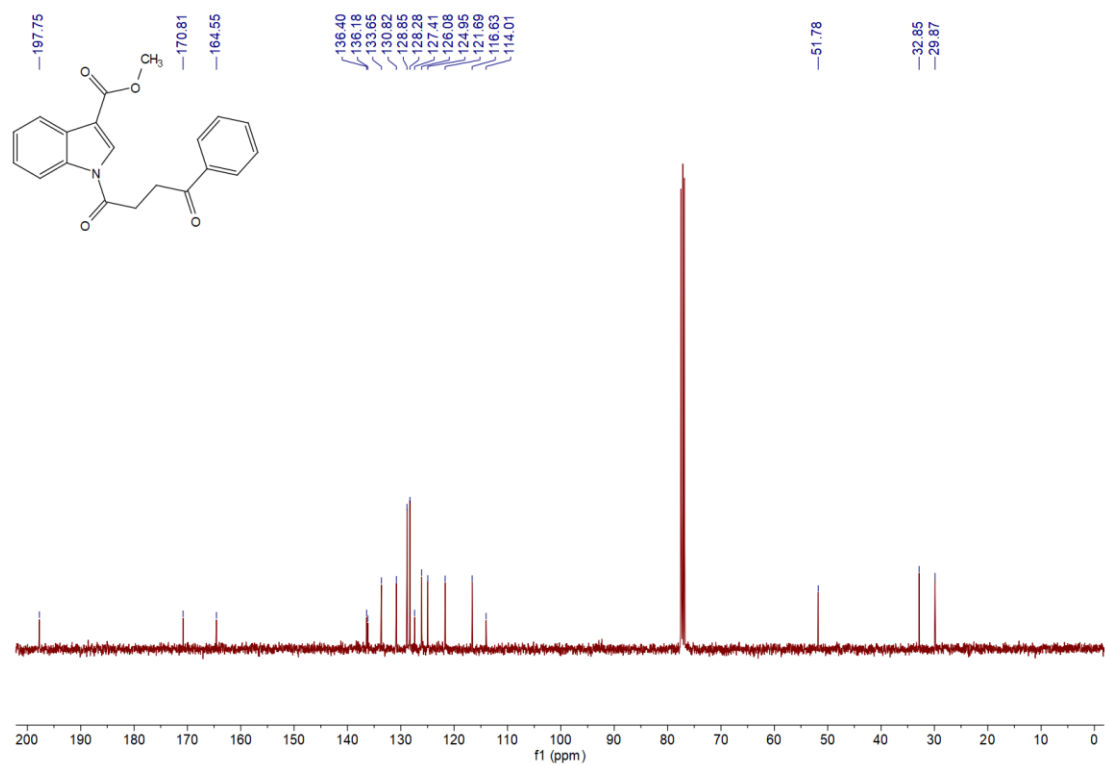

### <sup>1</sup>H NMR Spectrum of **1b**

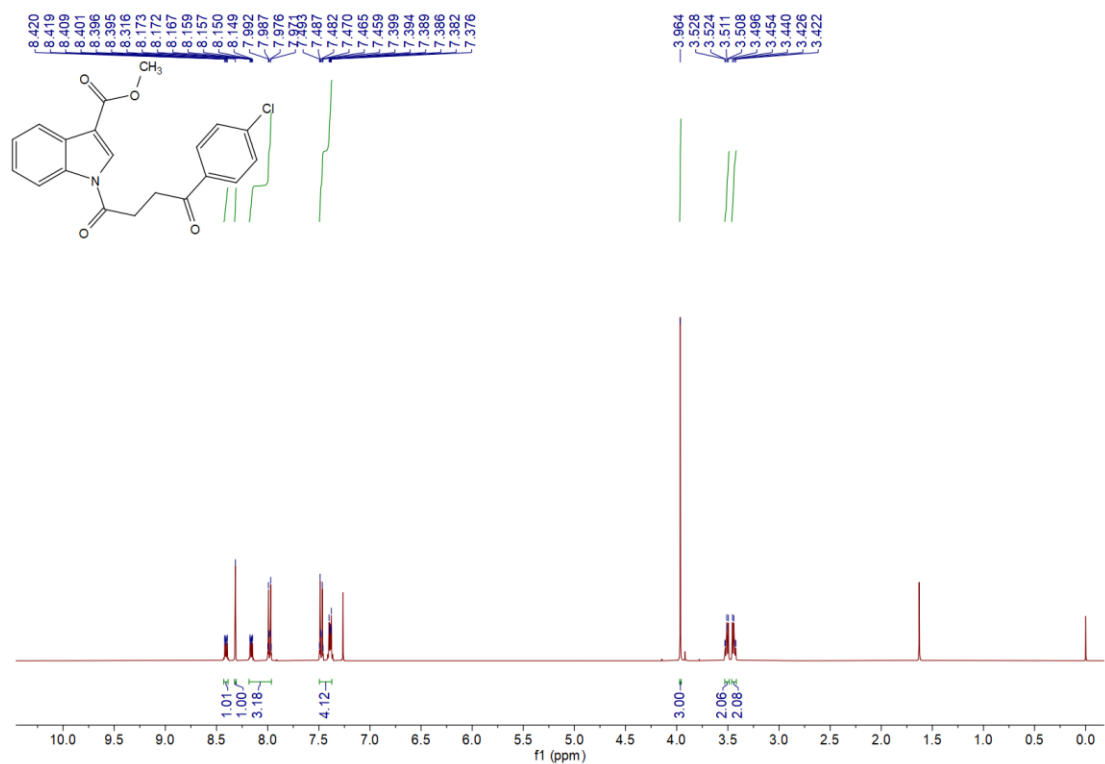



### <sup>13</sup>C NMR Spectrum of **1b**

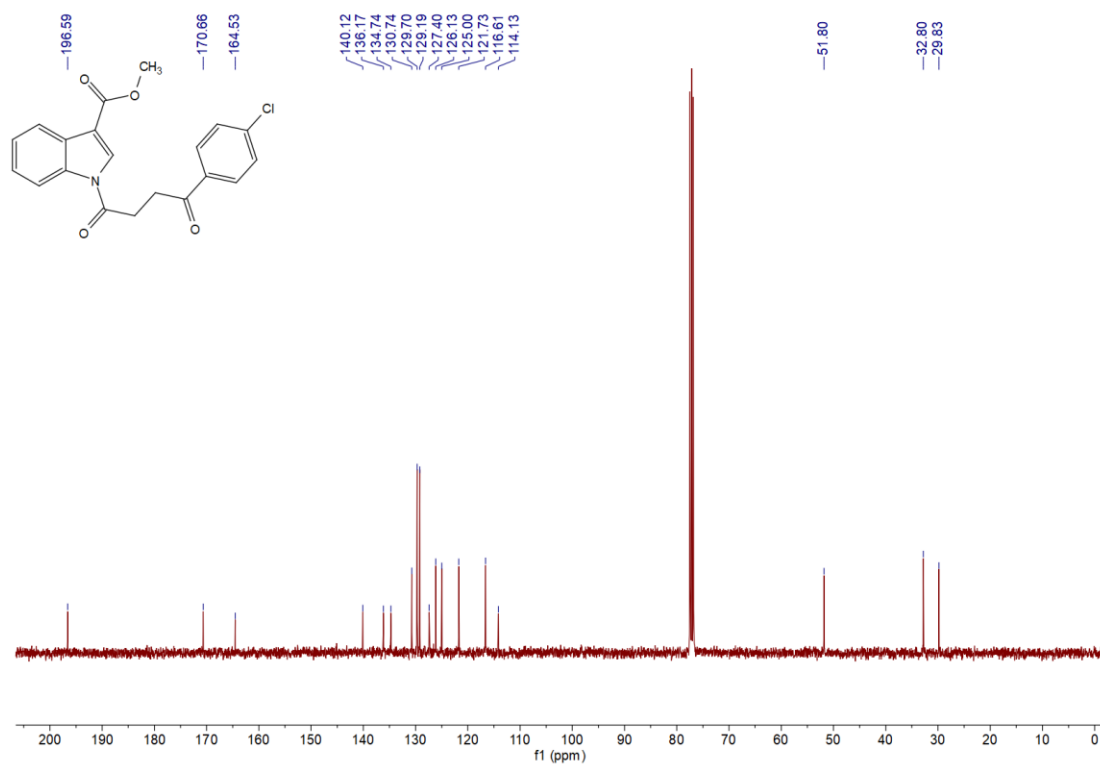

### <sup>1</sup>H NMR Spectrum of **1c**

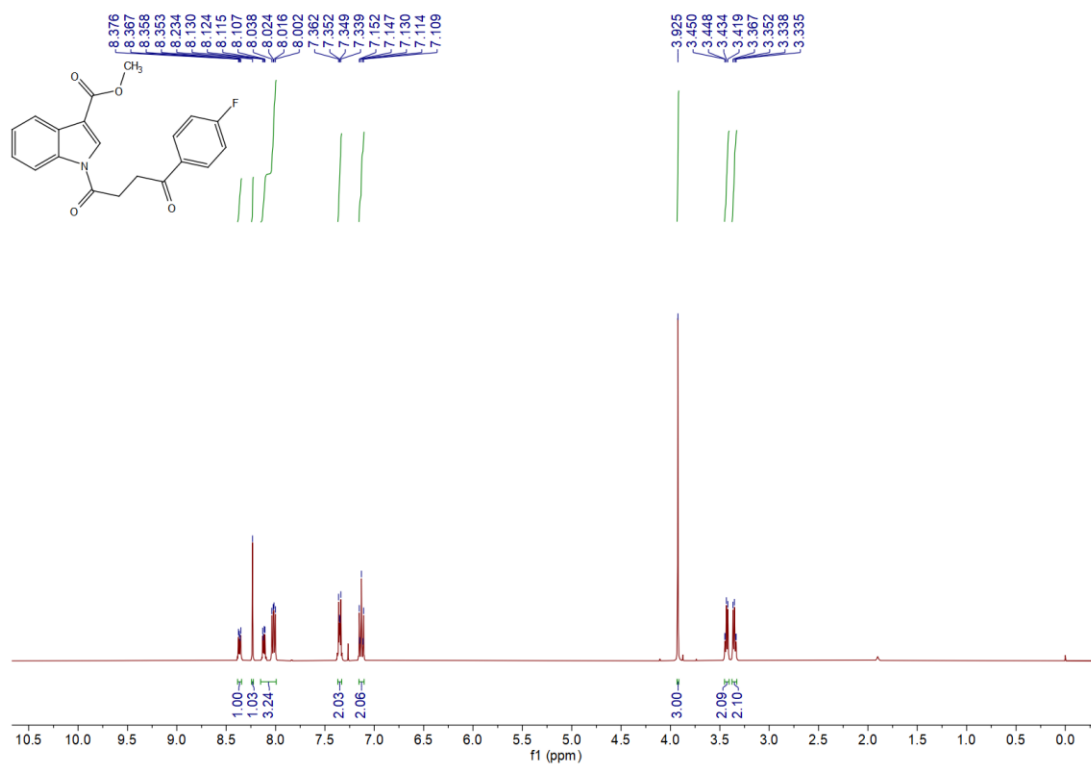

### <sup>13</sup>C NMR Spectrum of **1c**

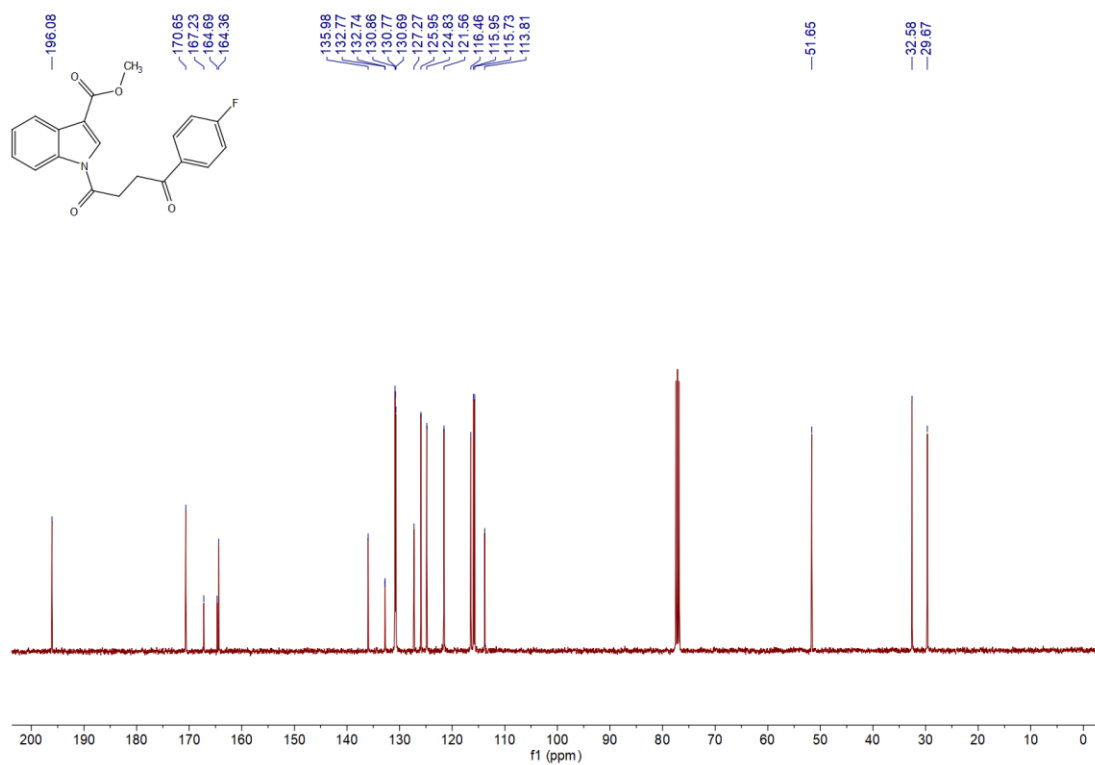

### <sup>19</sup>F NMR Spectrum of **1c**

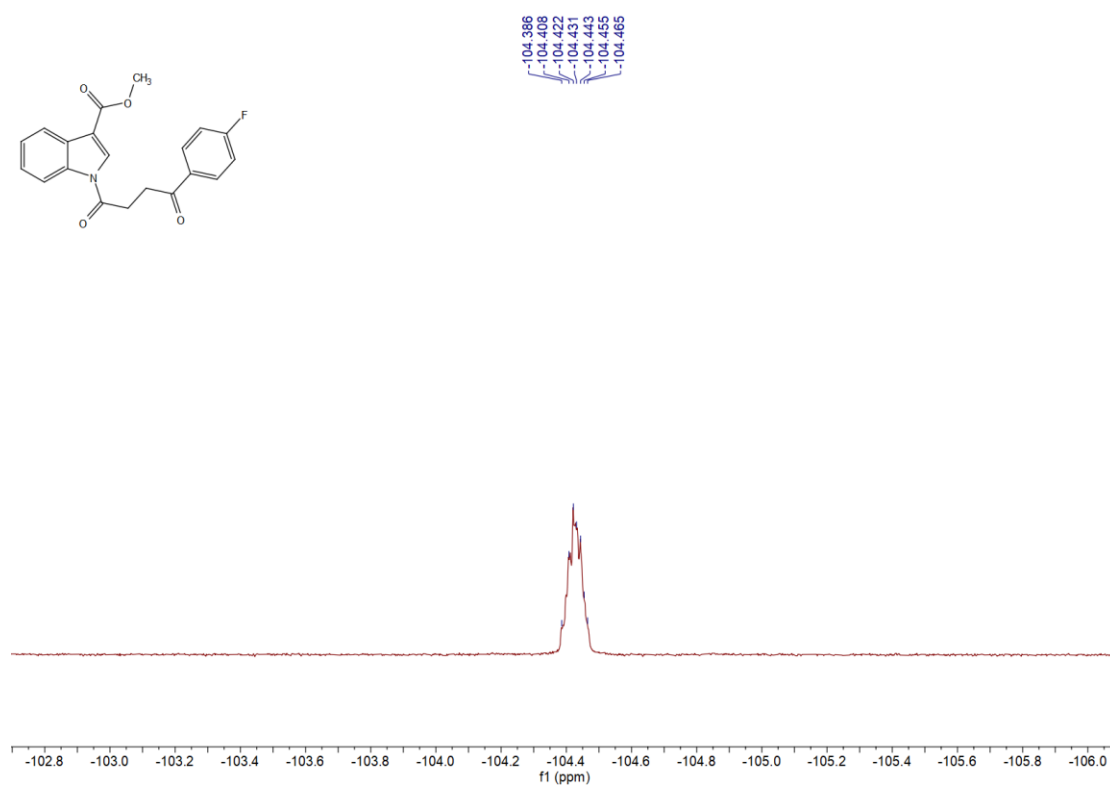

### <sup>1</sup>H NMR Spectrum of **1d**

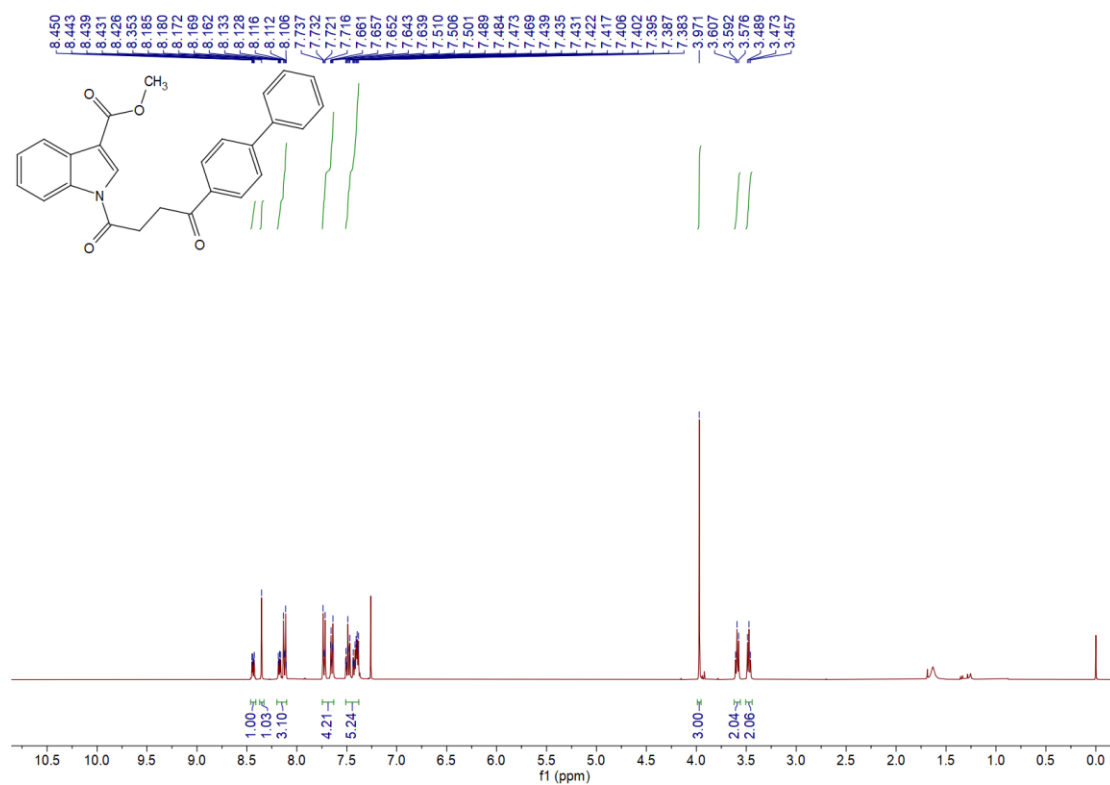

### <sup>13</sup>C NMR Spectrum of **1d**

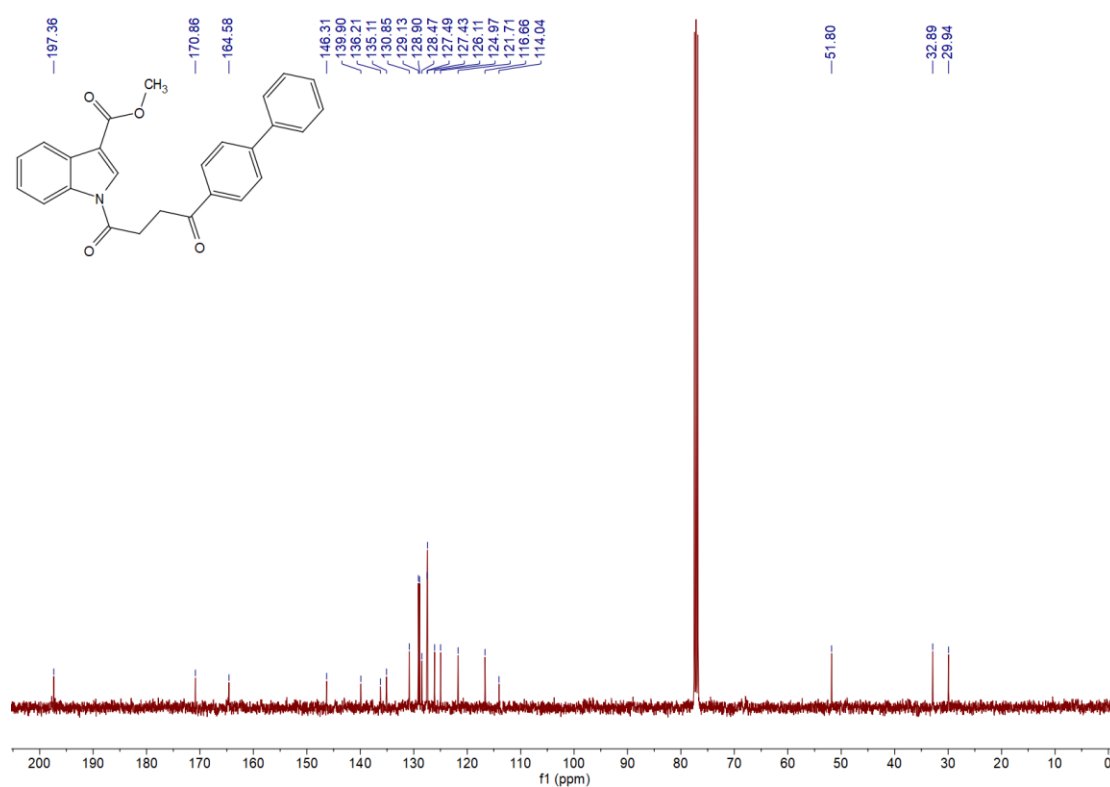

# <sup>1</sup>H NMR Spectrum of **1e**

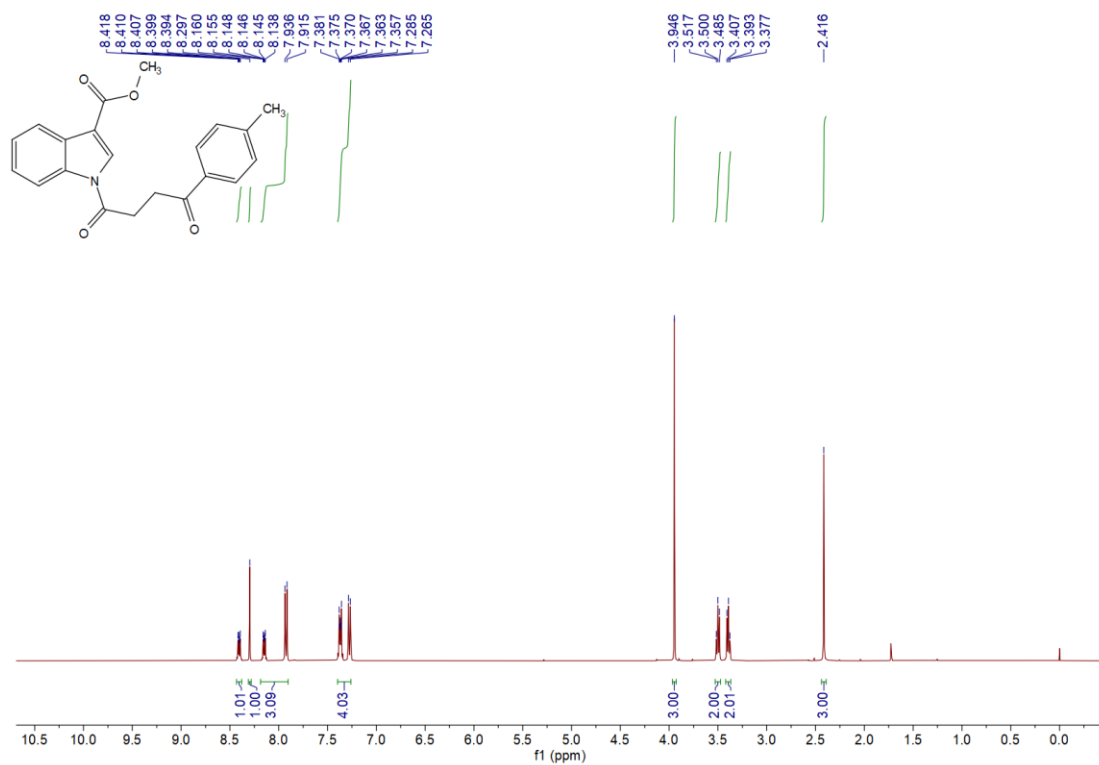

# <sup>13</sup>C NMR Spectrum of **1e**

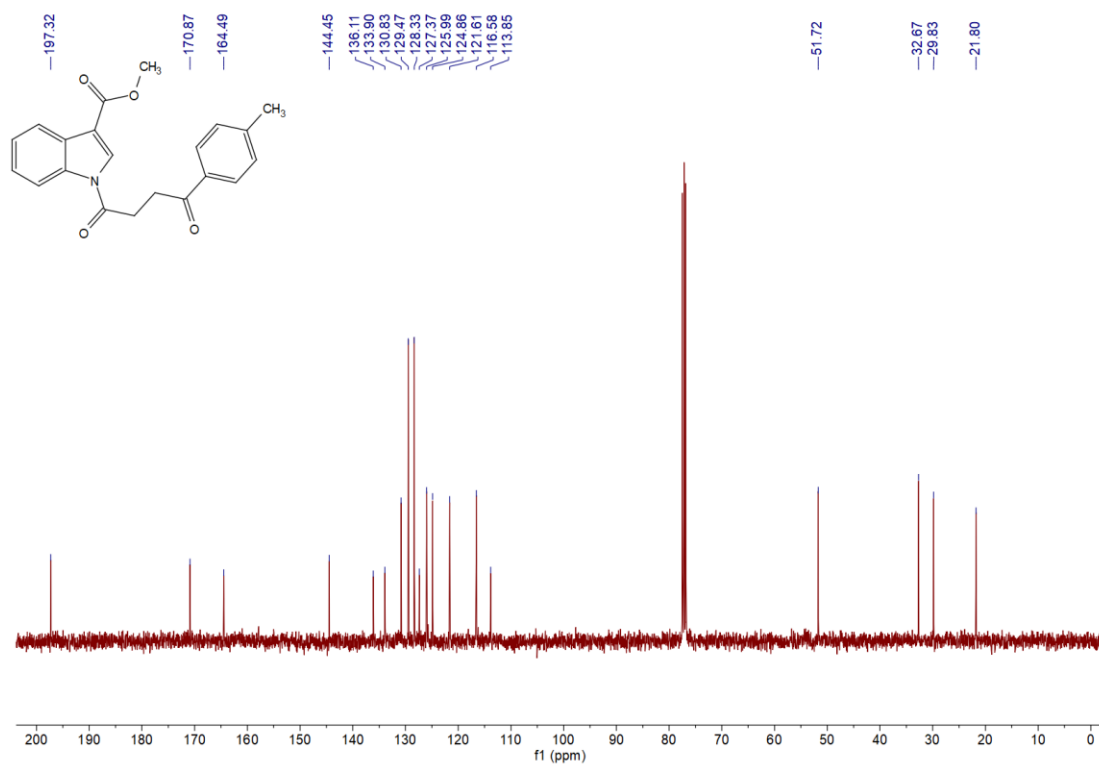

### <sup>1</sup>H NMR Spectrum of **1f**

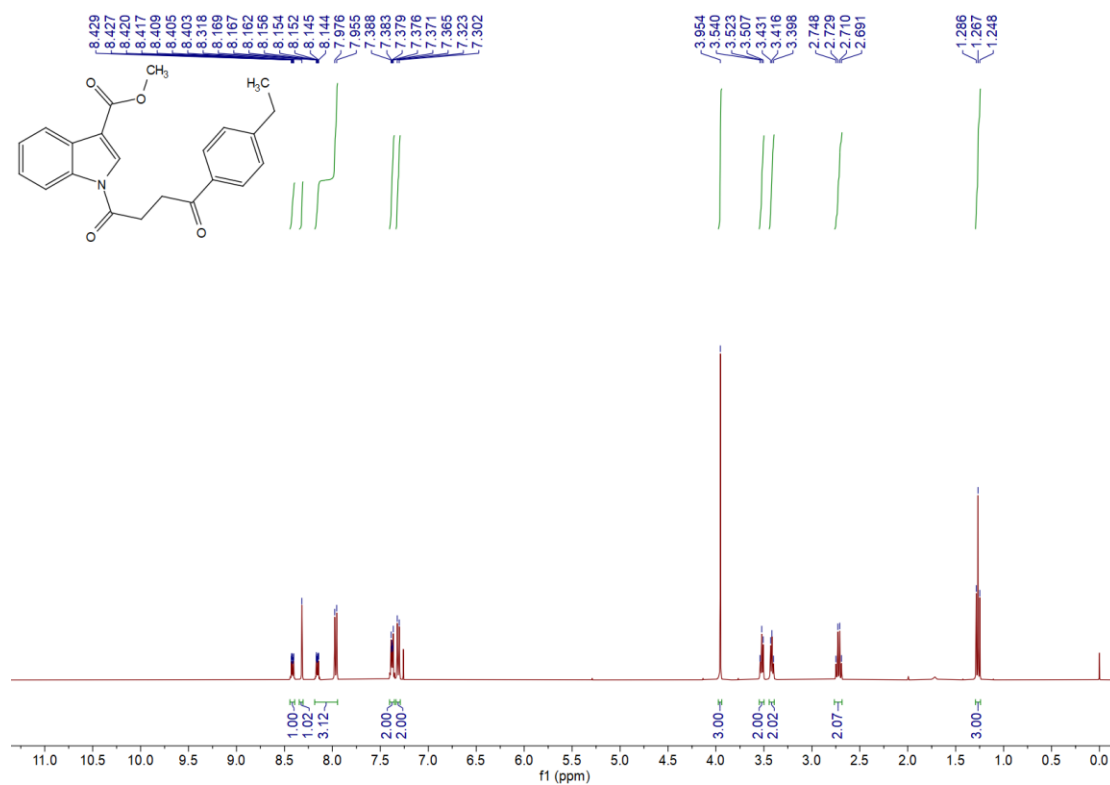

### <sup>13</sup>C NMR Spectrum of **1f**

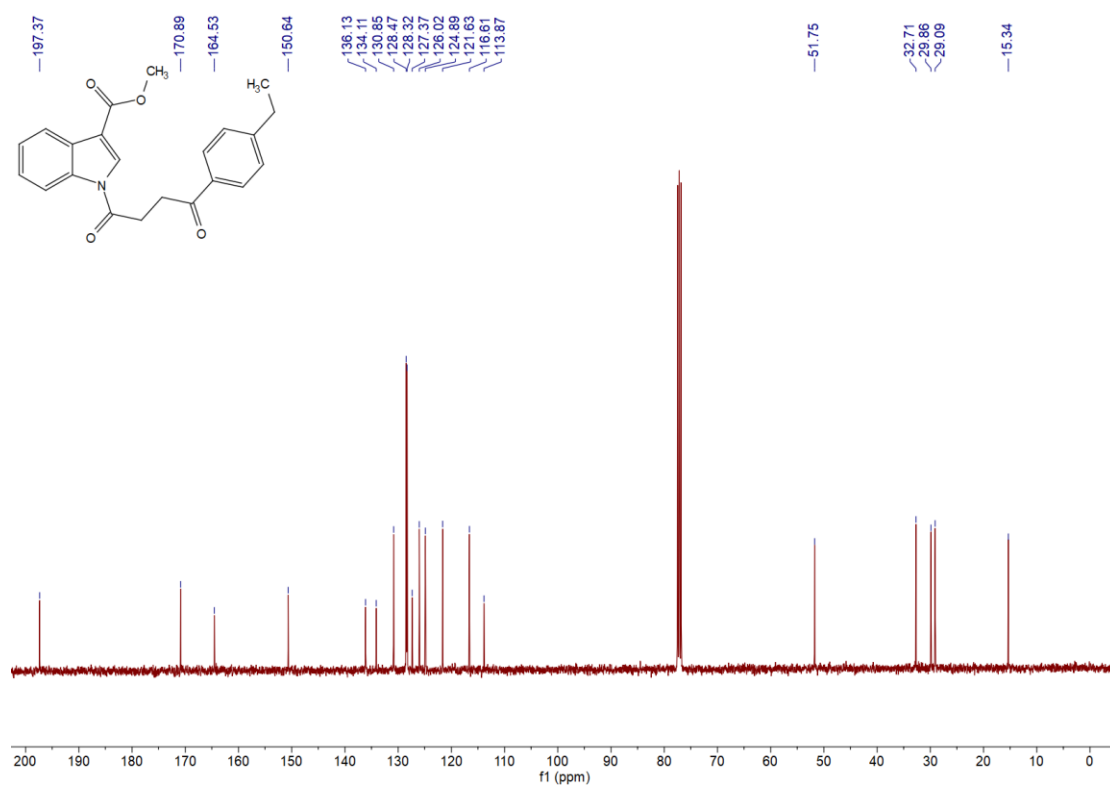



# <sup>1</sup>H NMR Spectrum of **1h**

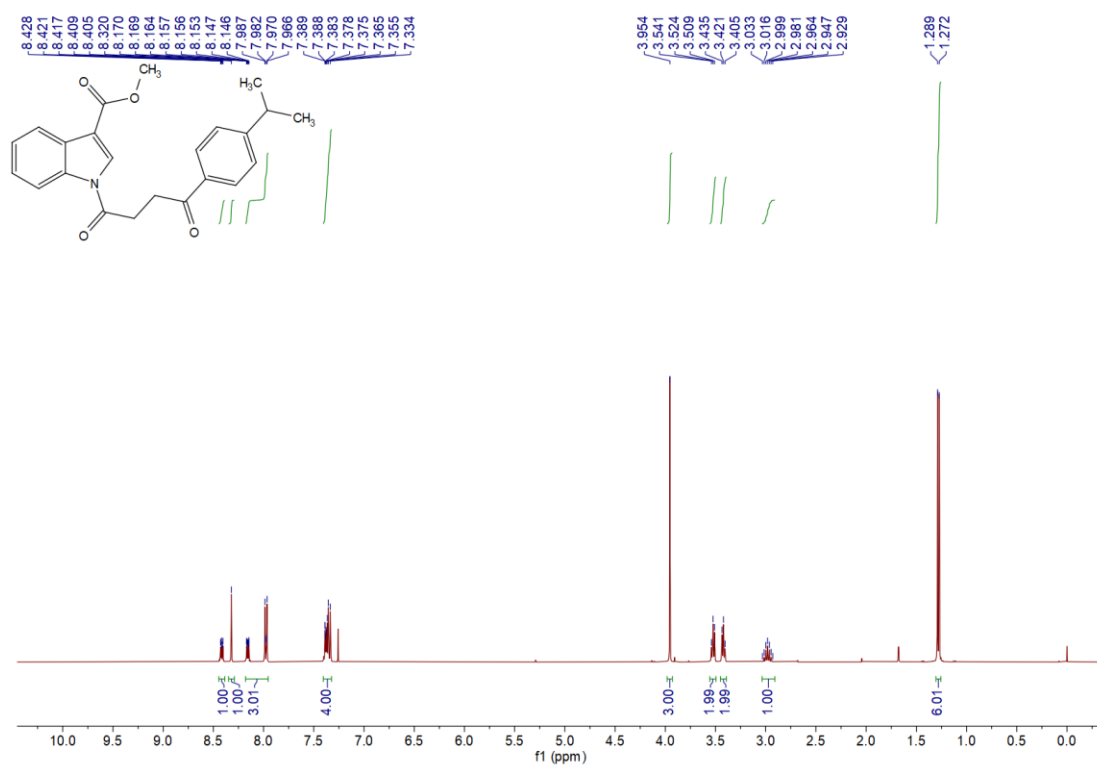

# <sup>13</sup>C NMR Spectrum of **1h**

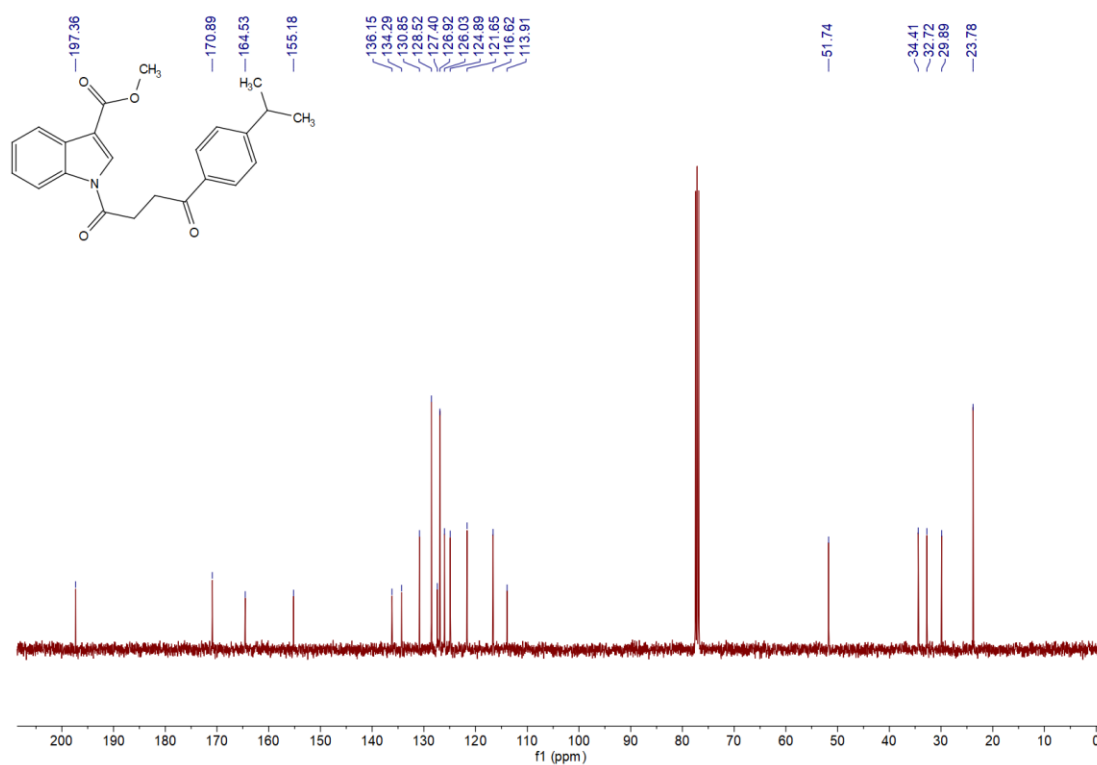

### <sup>1</sup>H NMR Spectrum of **1i**

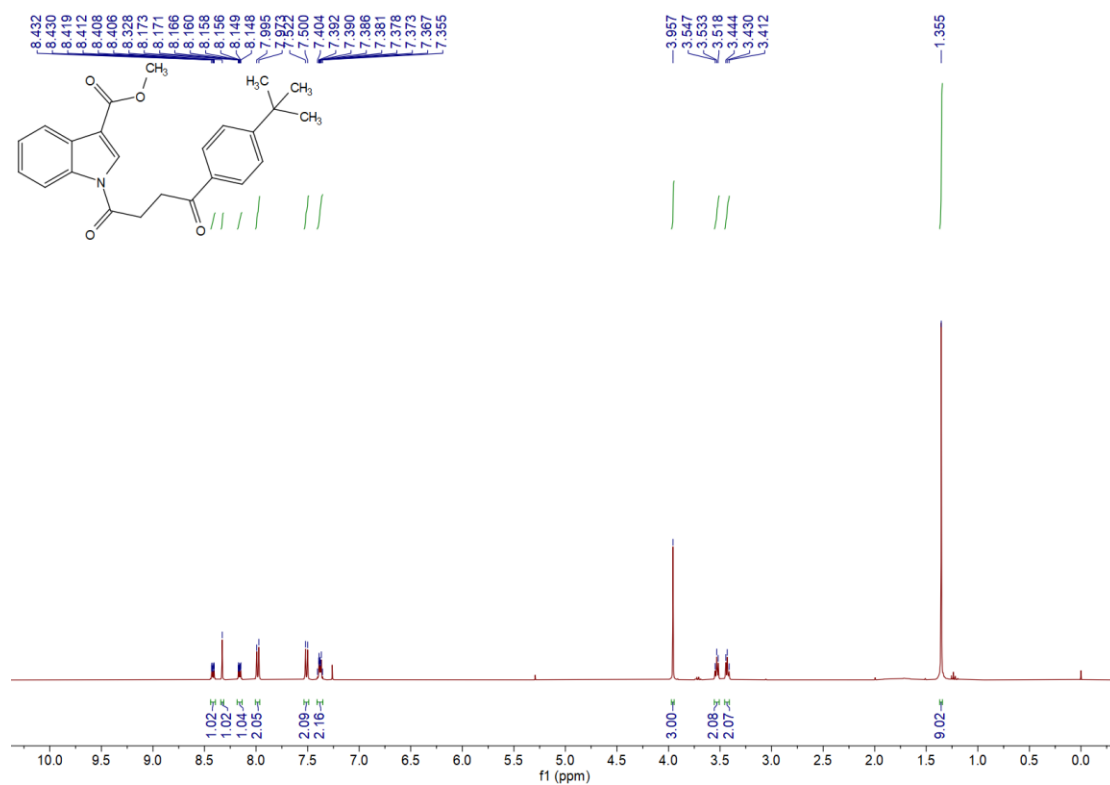

### <sup>13</sup>C NMR Spectrum of **1i**

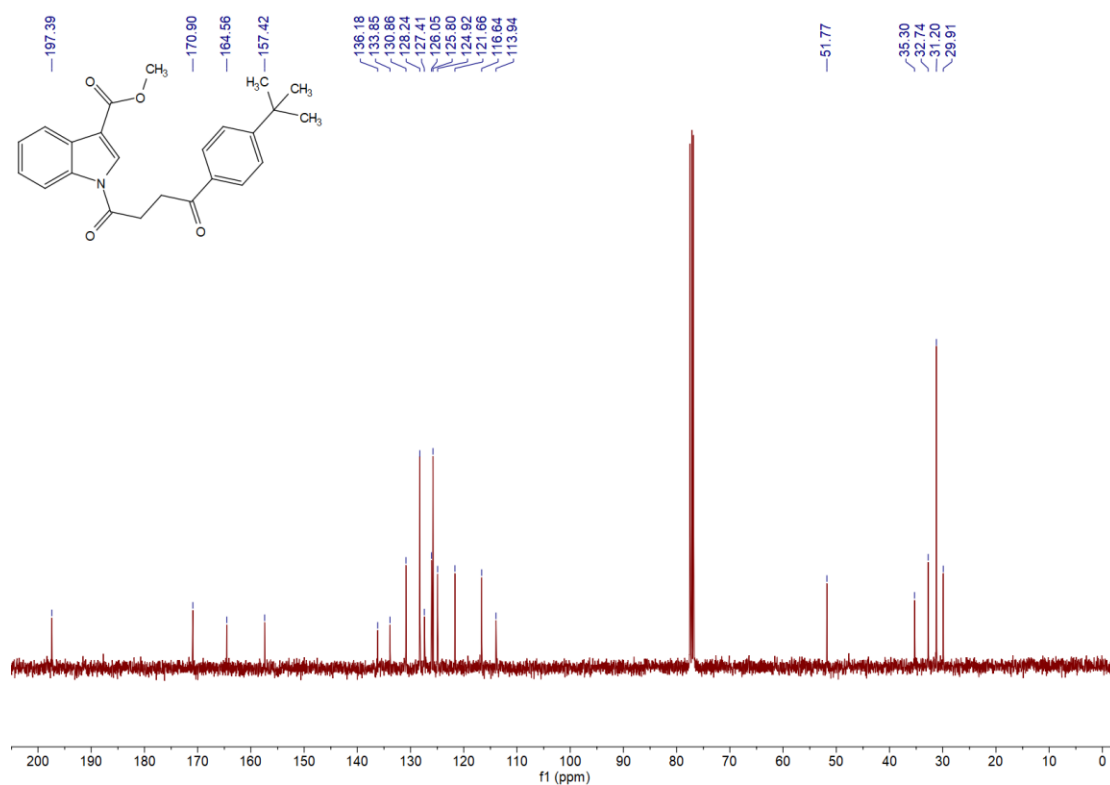



### <sup>1</sup>H NMR Spectrum of **1j**

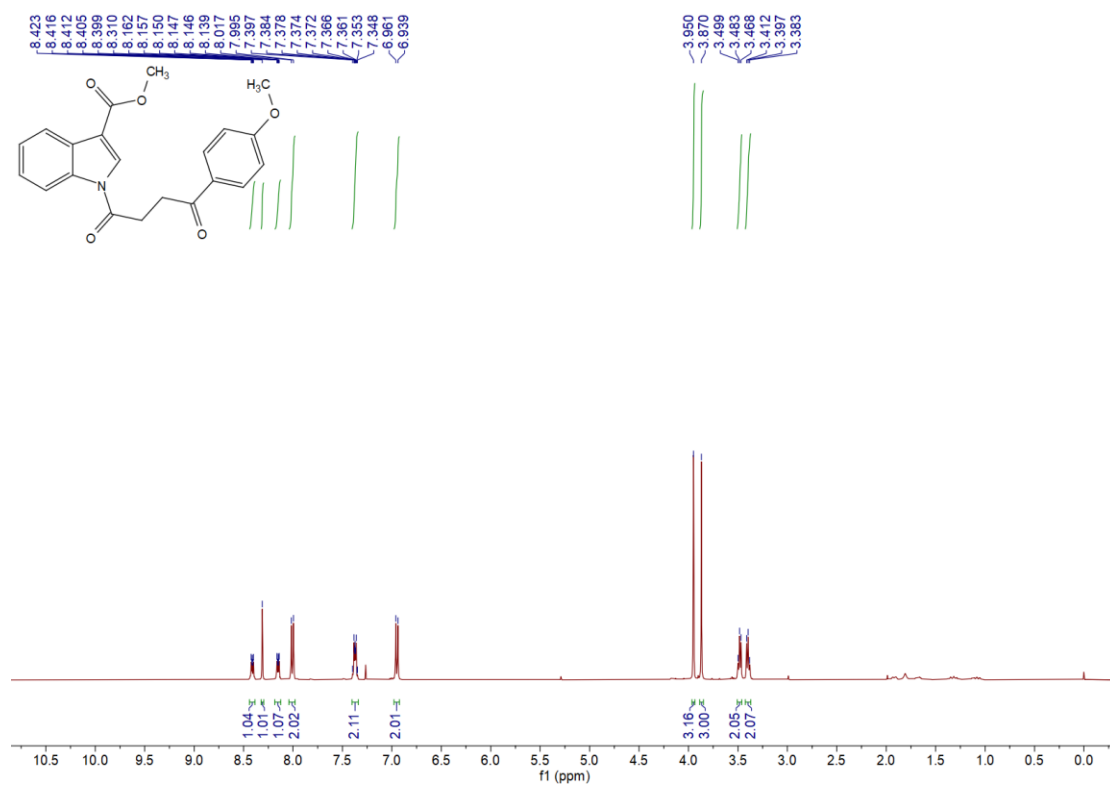

### <sup>13</sup>C NMR Spectrum of **1j**

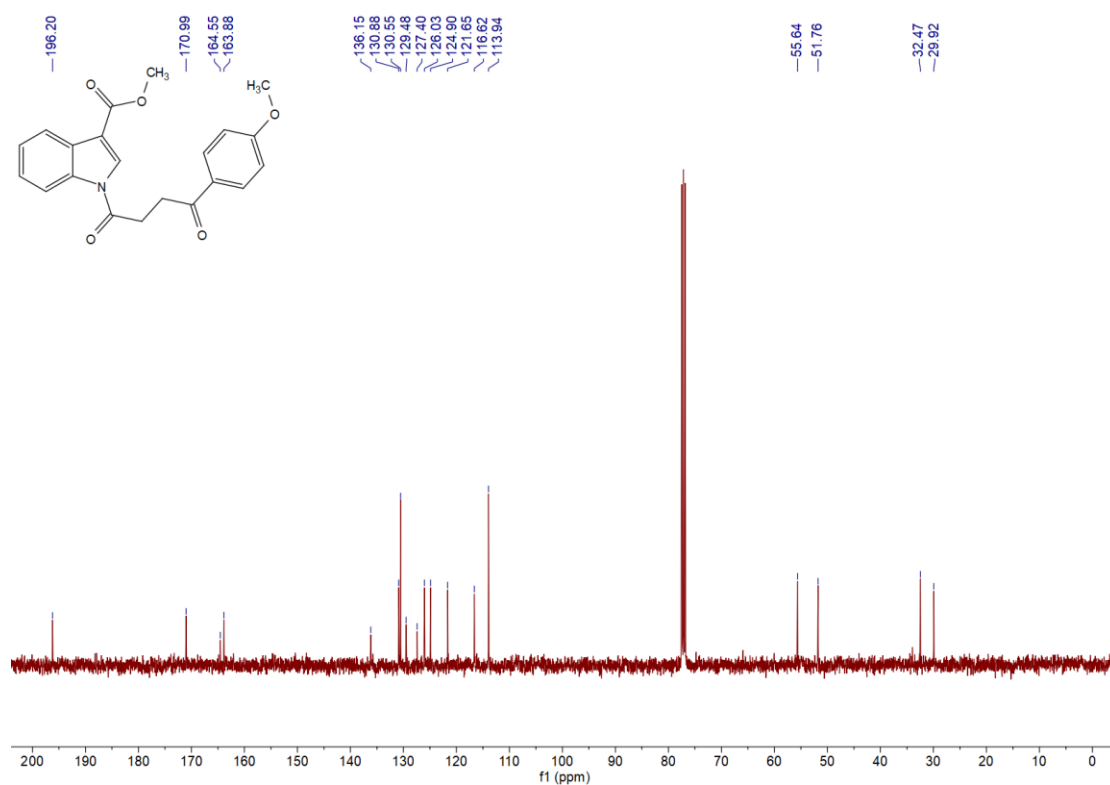

### <sup>1</sup>H NMR Spectrum of **1k**

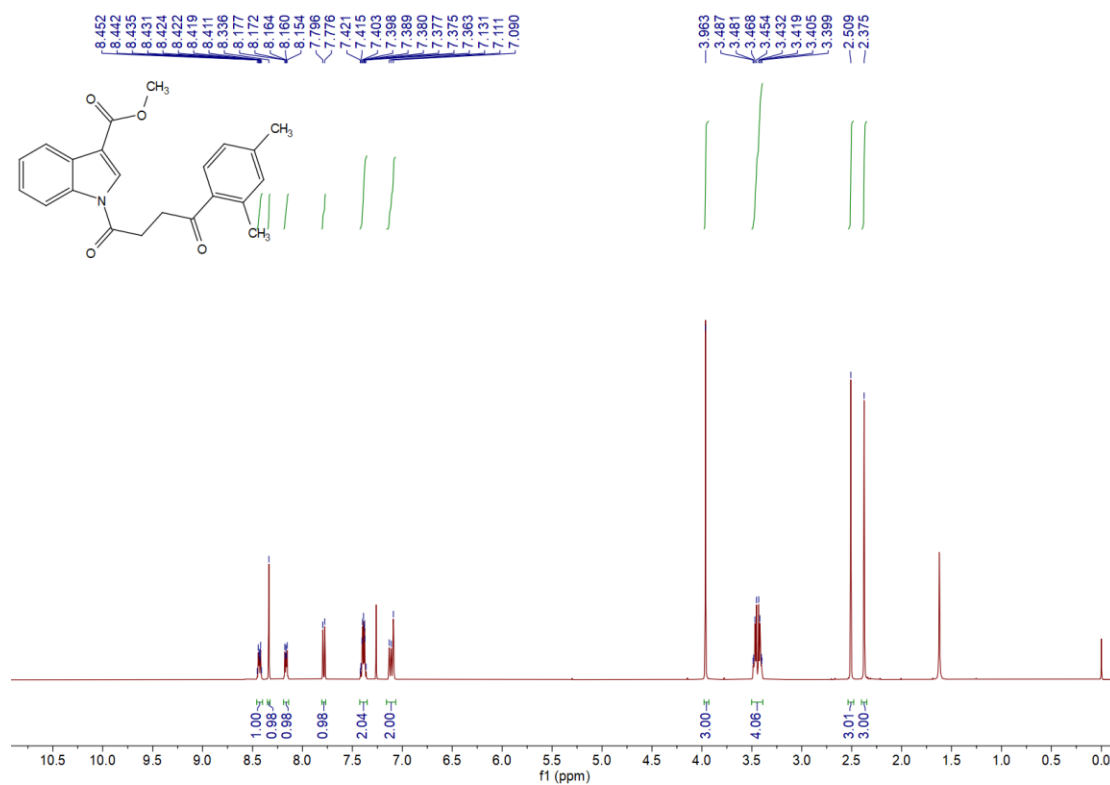

### <sup>13</sup>C NMR Spectrum of **1k**

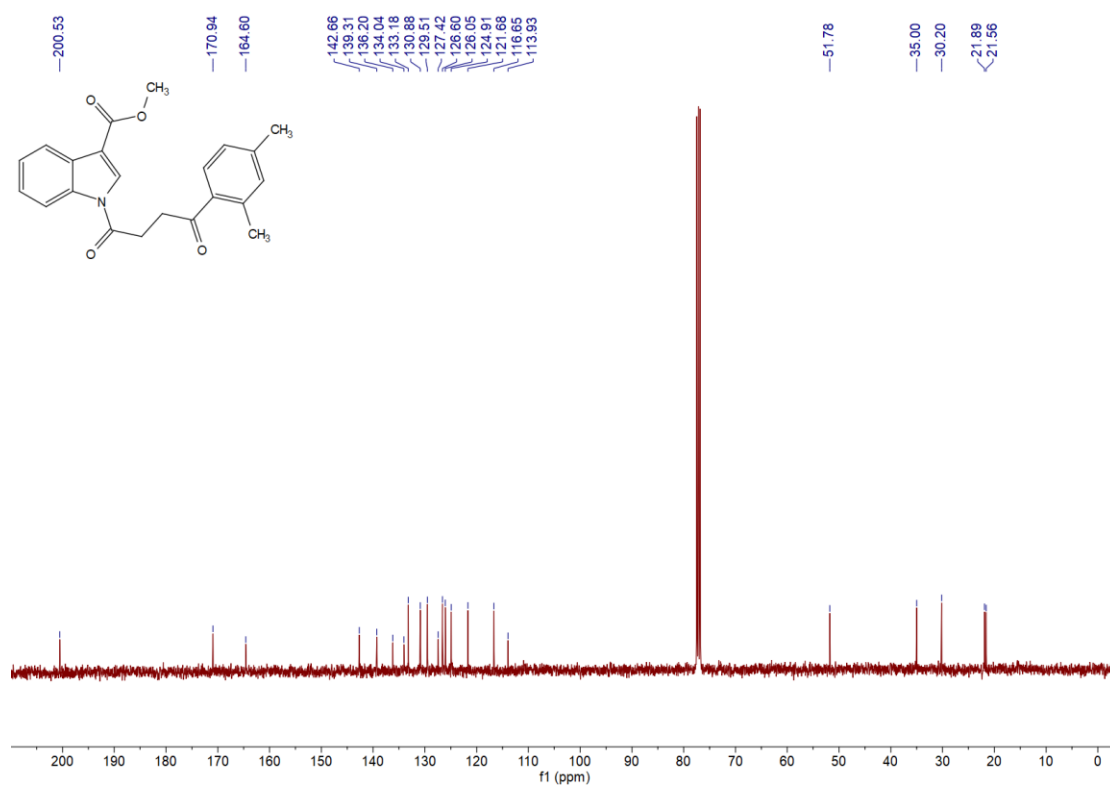

# <sup>1</sup>H NMR Spectrum of **11**

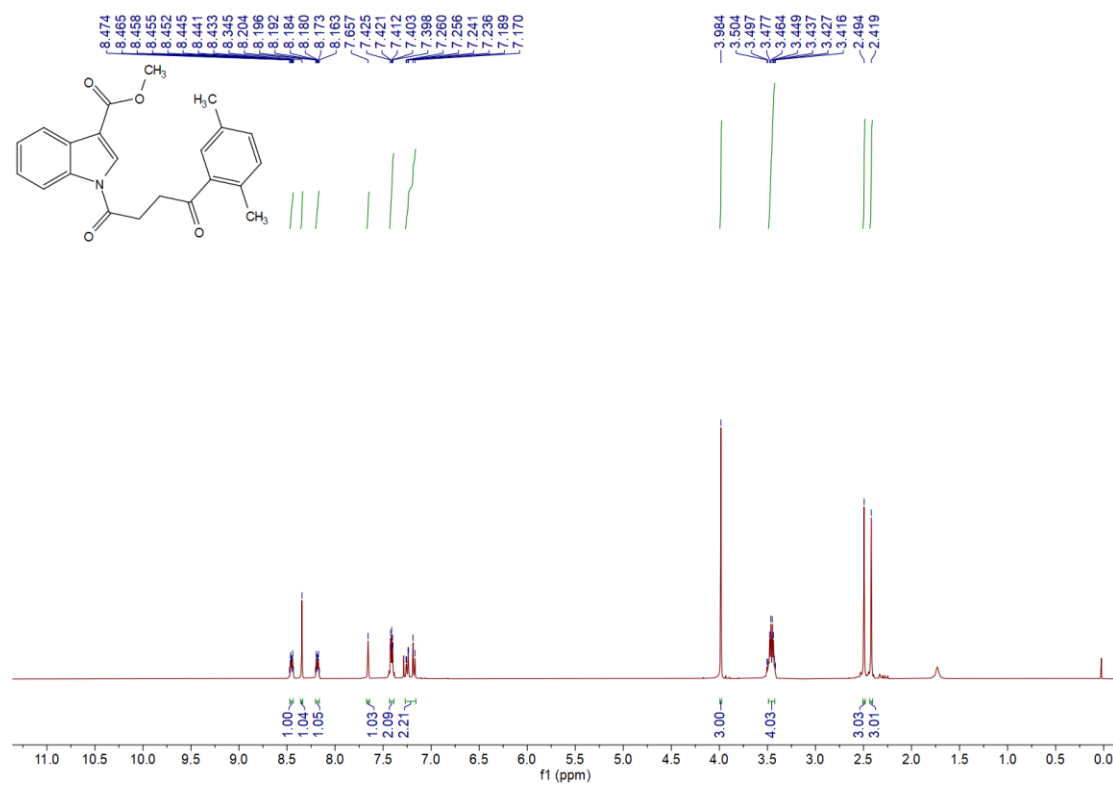

# <sup>13</sup>C NMR Spectrum of **11**

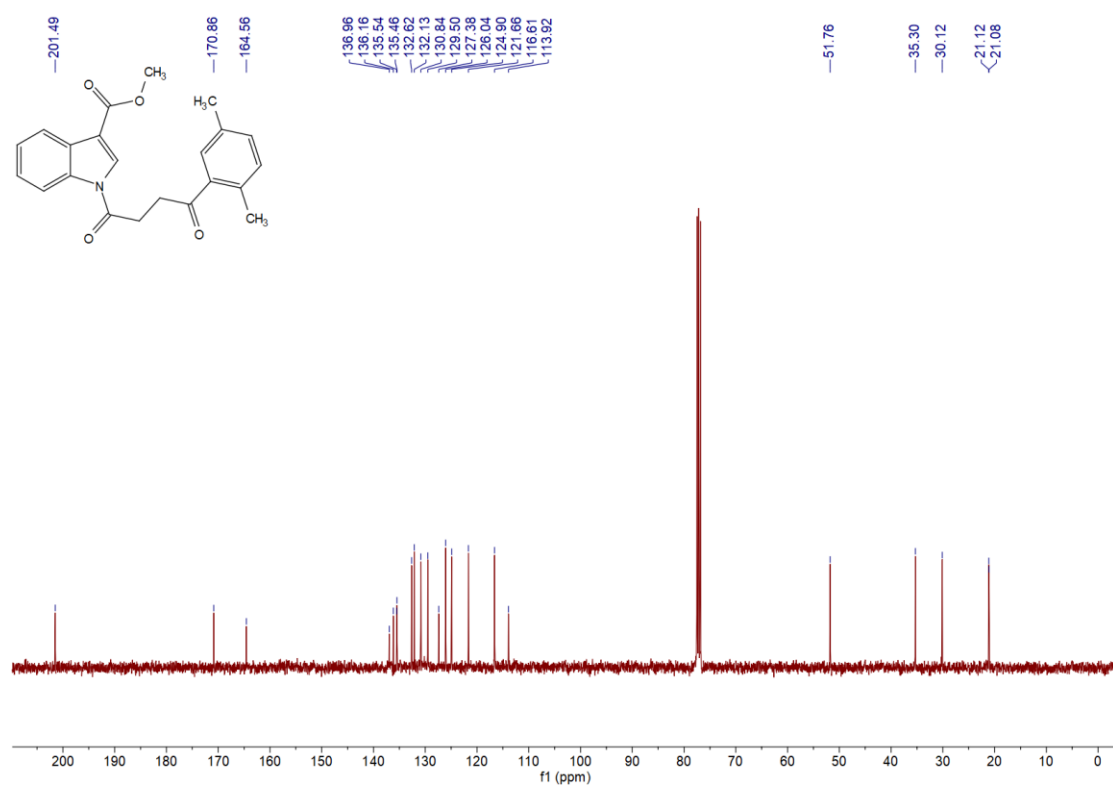

# <sup>1</sup>H NMR Spectrum of **1m**

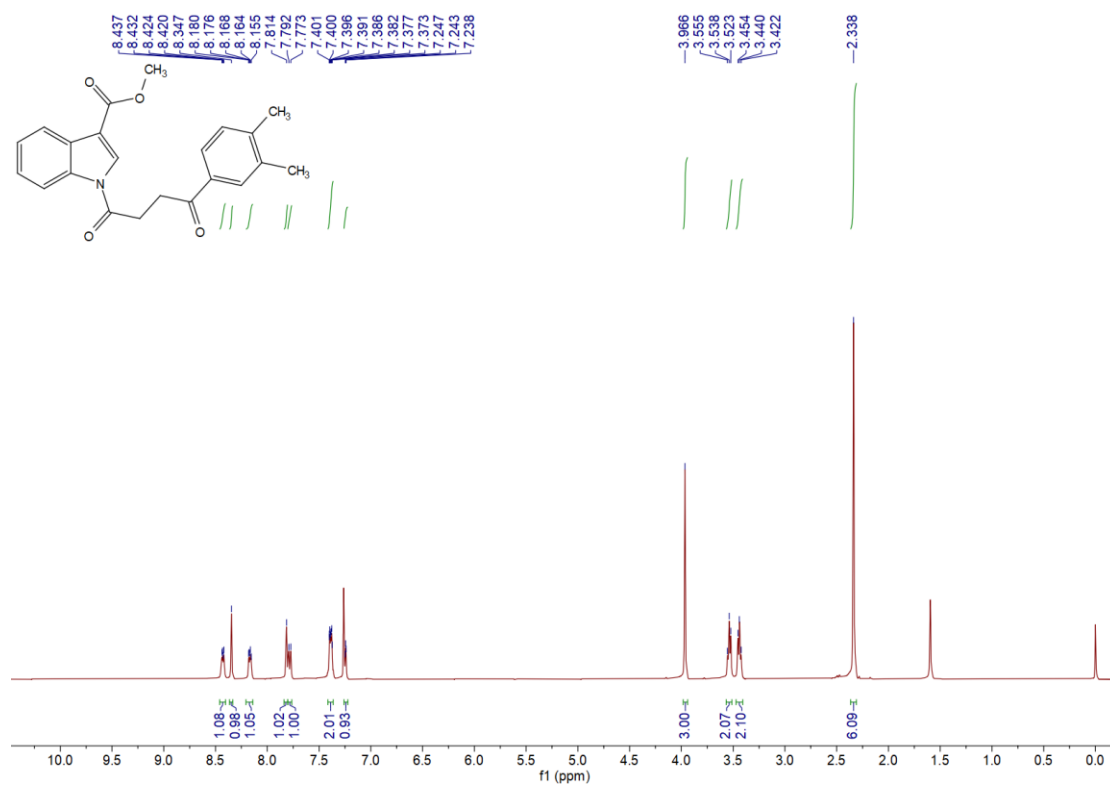

# <sup>13</sup>C NMR Spectrum of **1m**

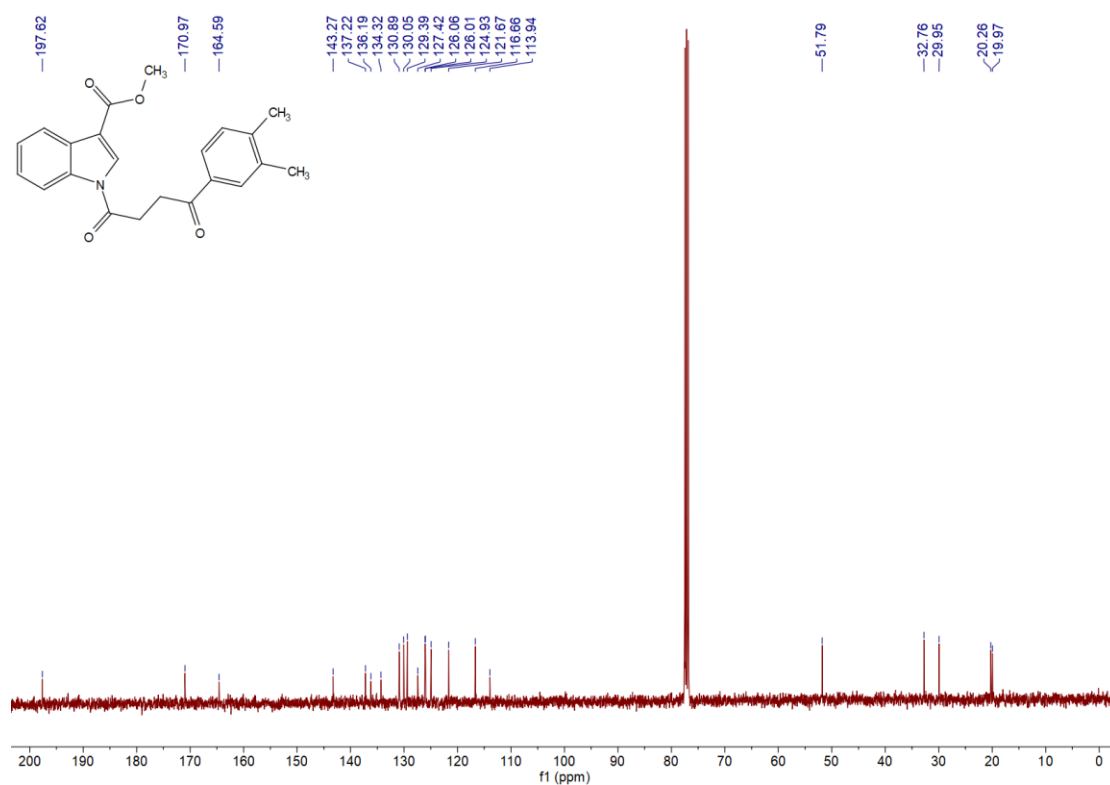

### <sup>1</sup>H NMR Spectrum of **1n**

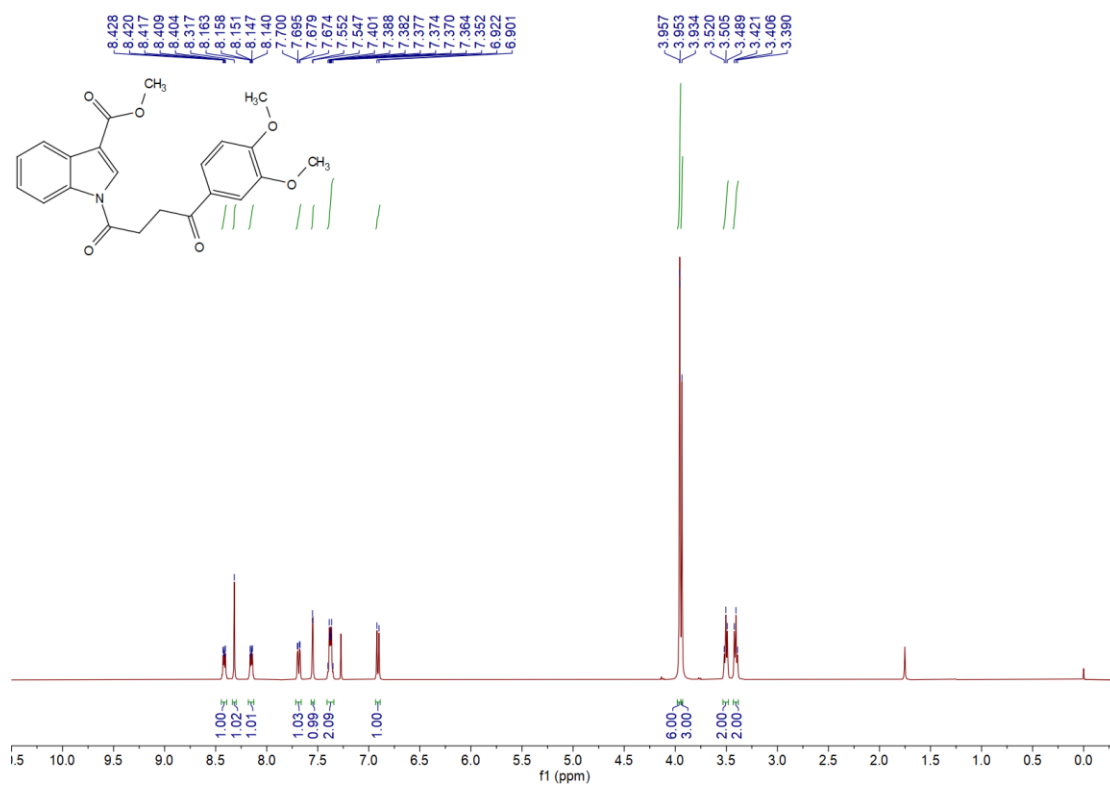

### <sup>13</sup>C NMR Spectrum of **1n**

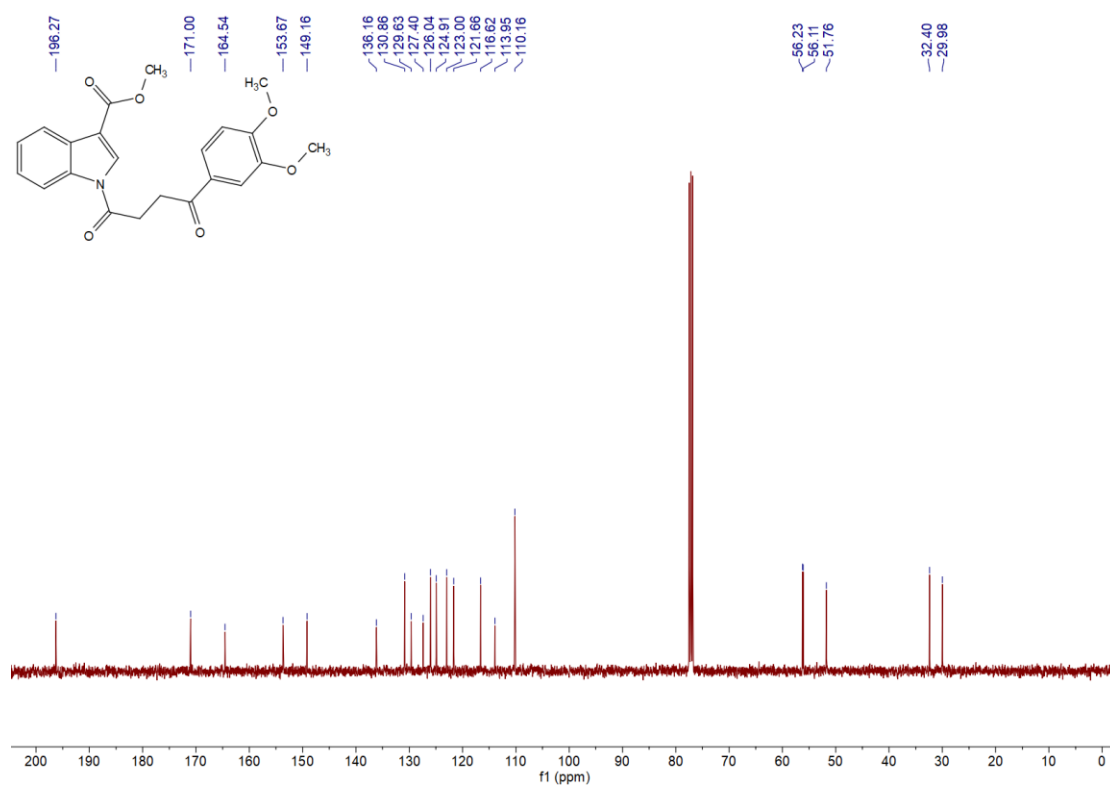

# <sup>1</sup>H NMR Spectrum of **10**

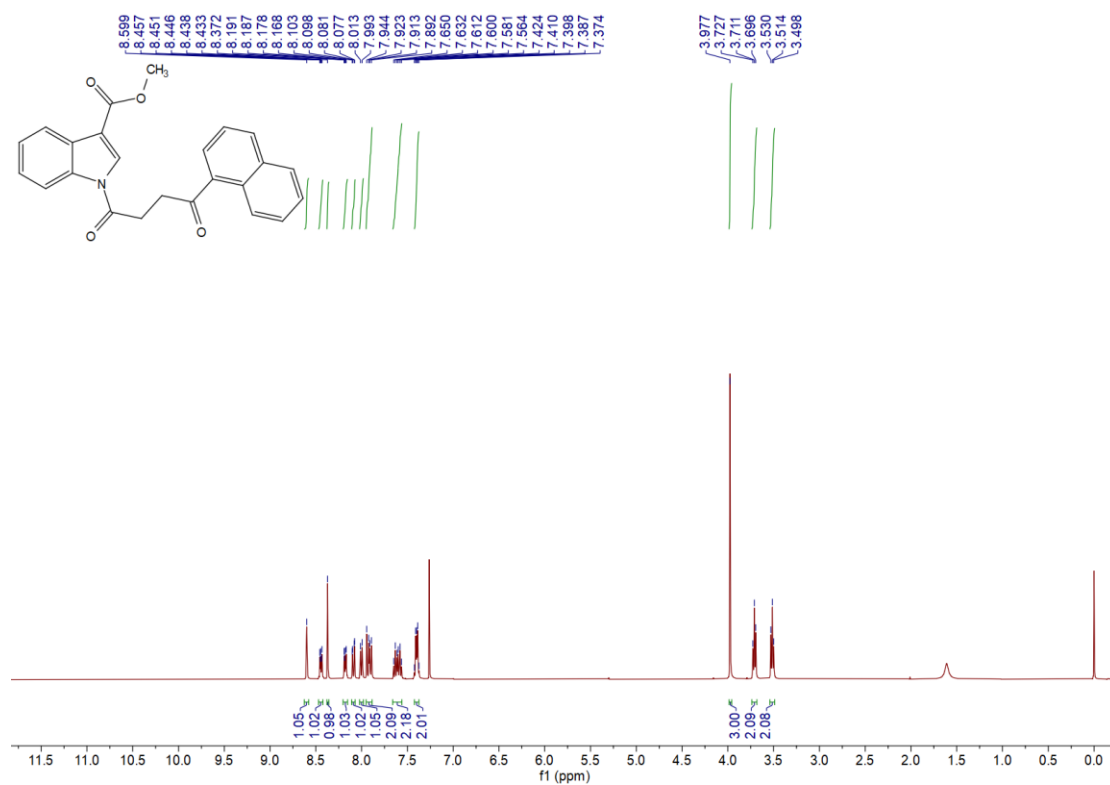

# <sup>13</sup>C NMR Spectrum of **10**

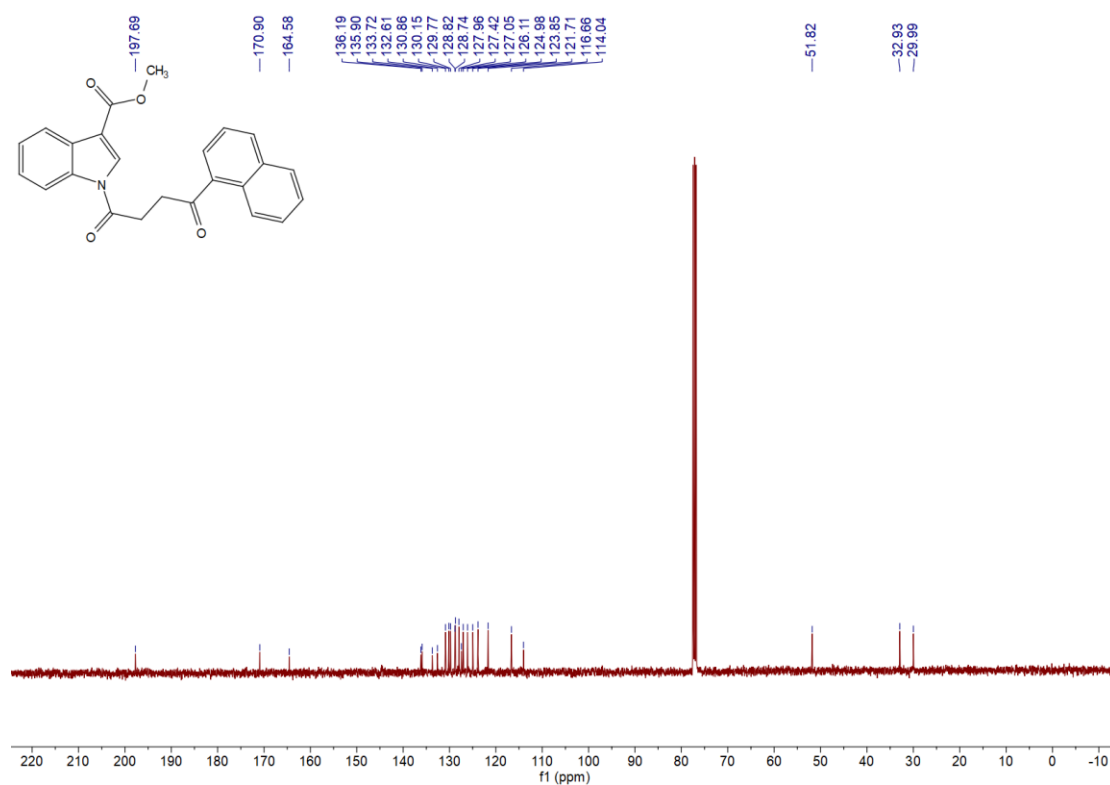

### <sup>1</sup>H NMR Spectrum of **1p**

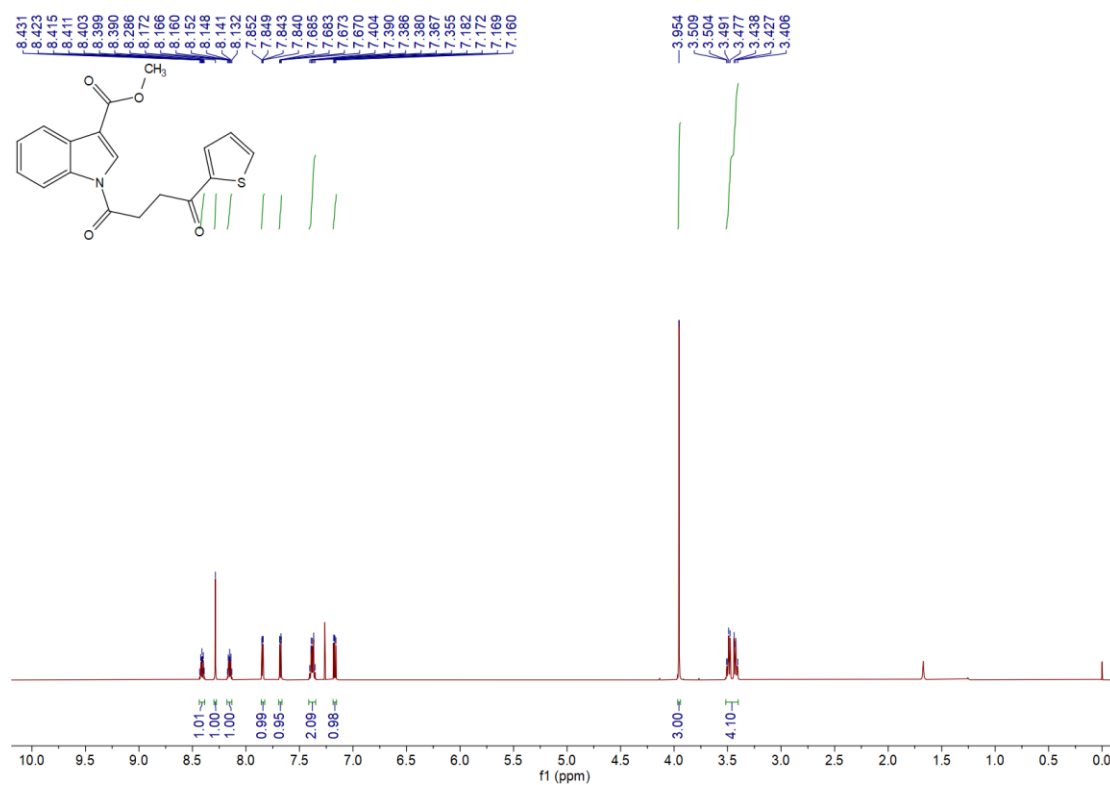

### <sup>13</sup>C NMR Spectrum of **1p**

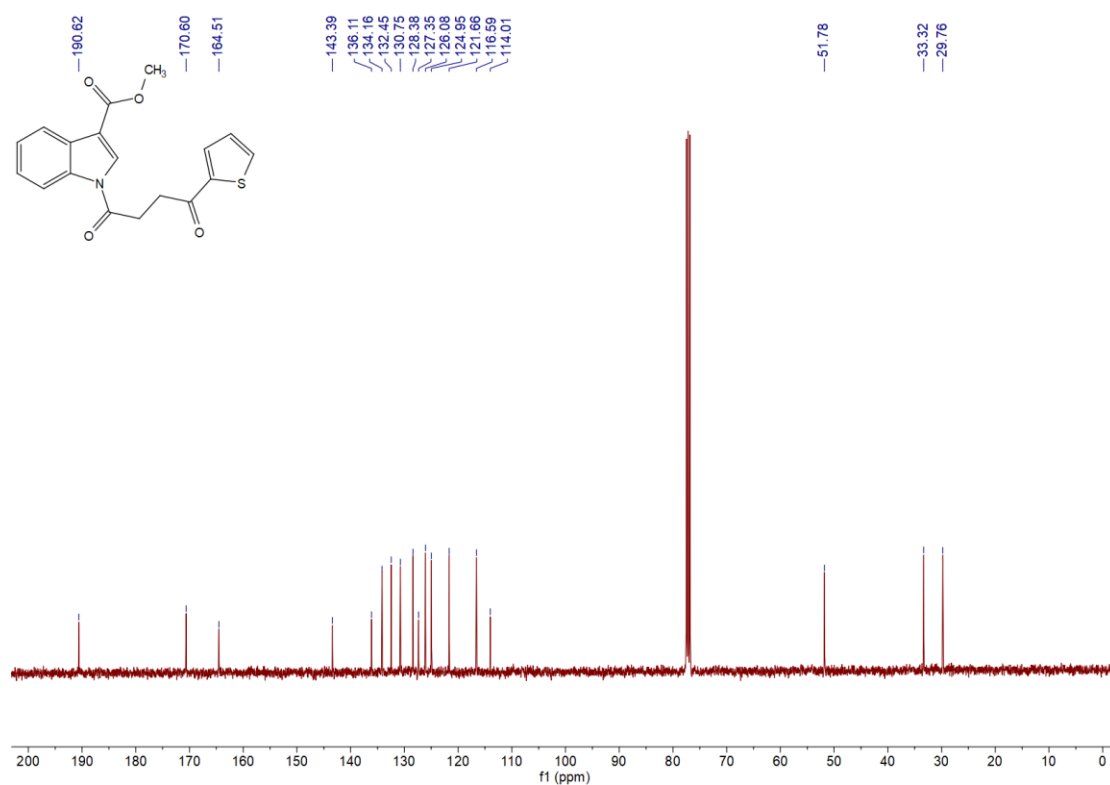

### <sup>1</sup>H NMR Spectrum of **1q**

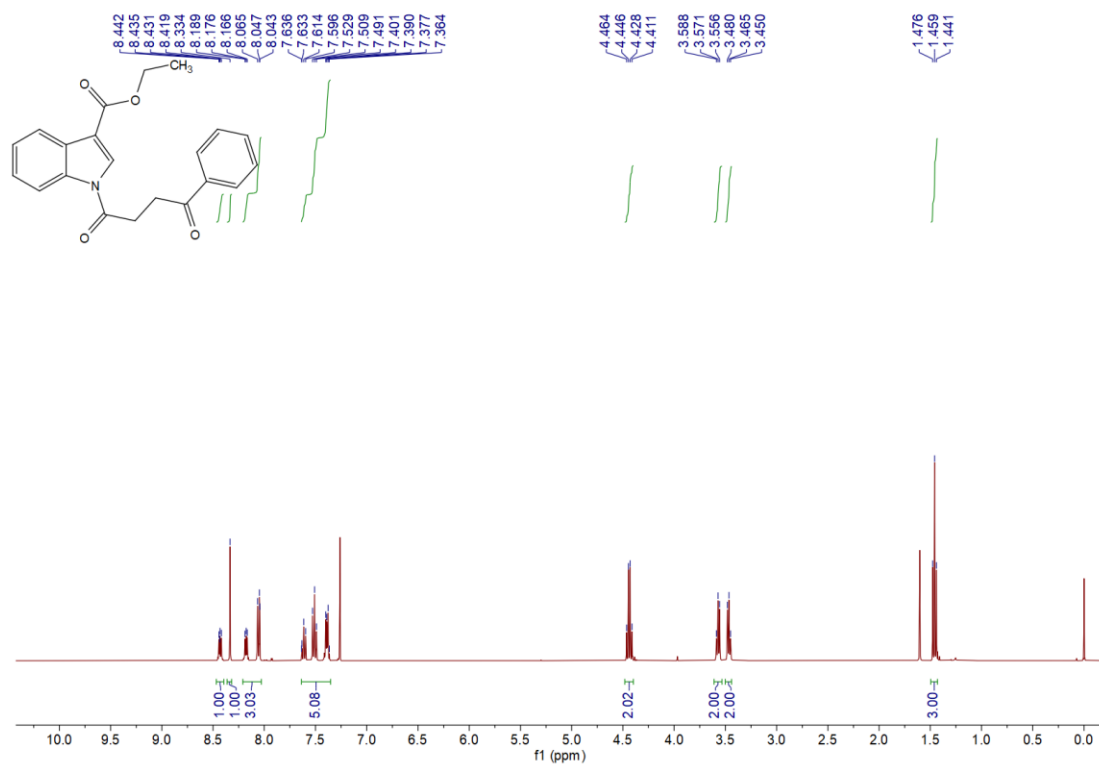

### <sup>13</sup>C NMR Spectrum of **1q**

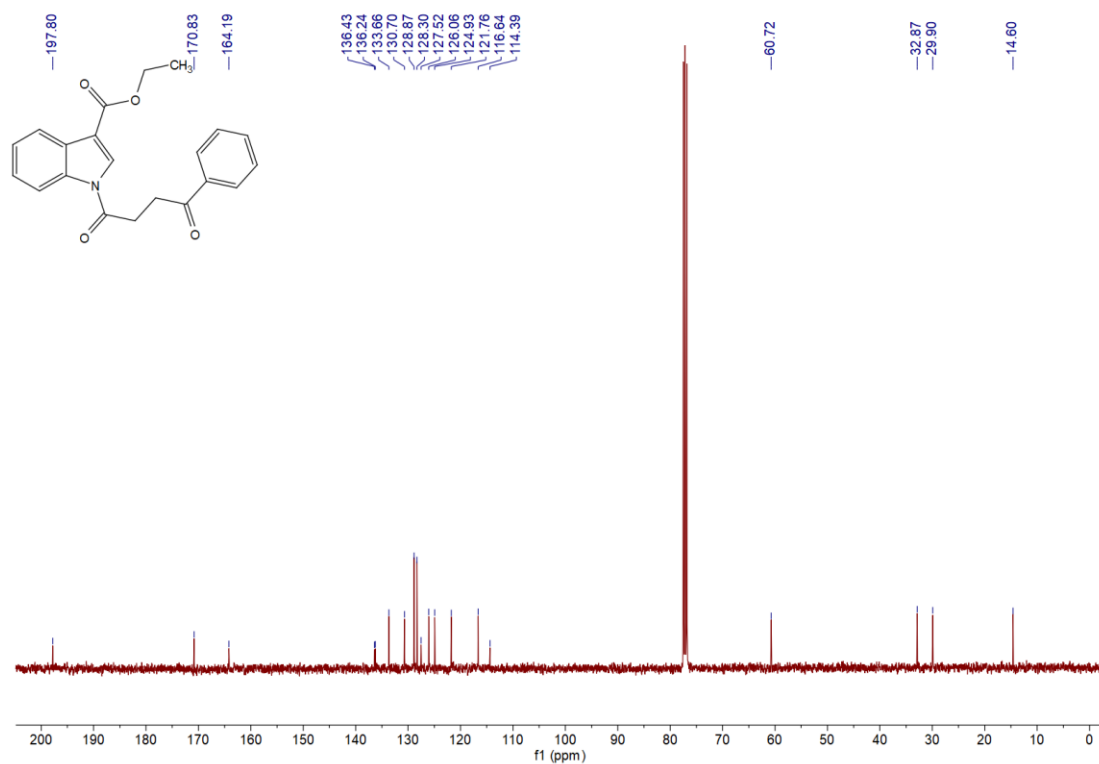



### <sup>1</sup>H NMR Spectrum of **1r**

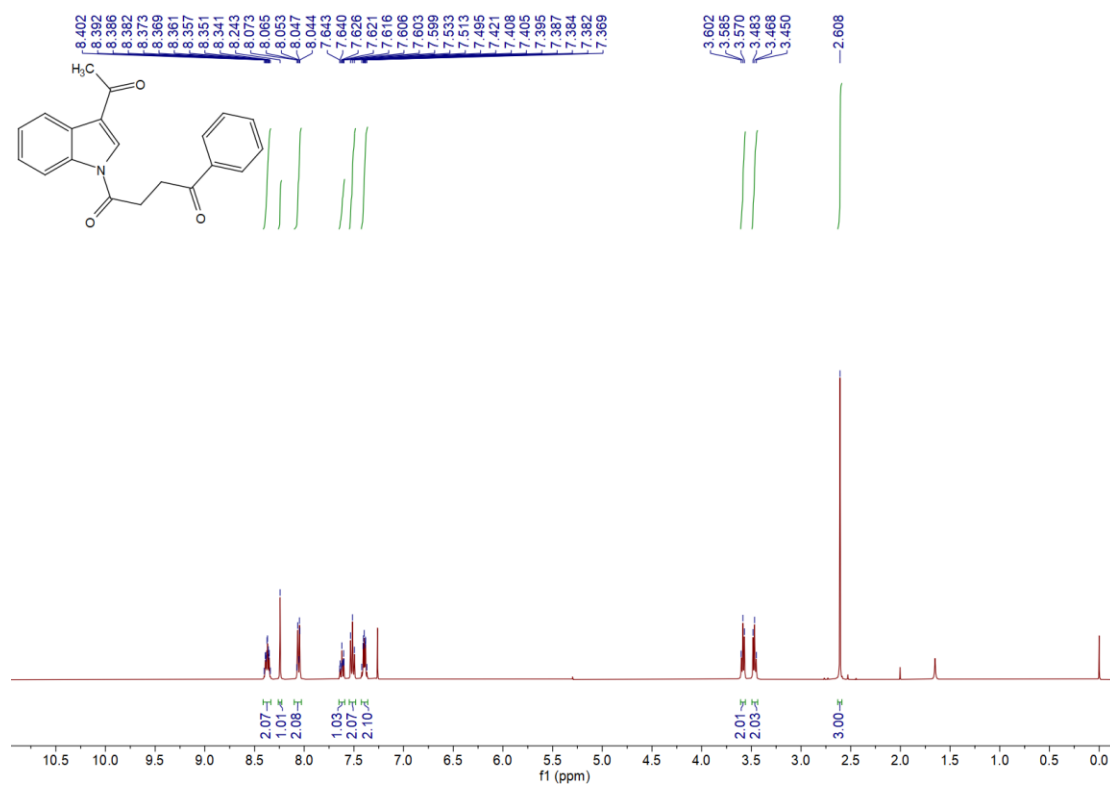

### <sup>13</sup>C NMR Spectrum of **1r**

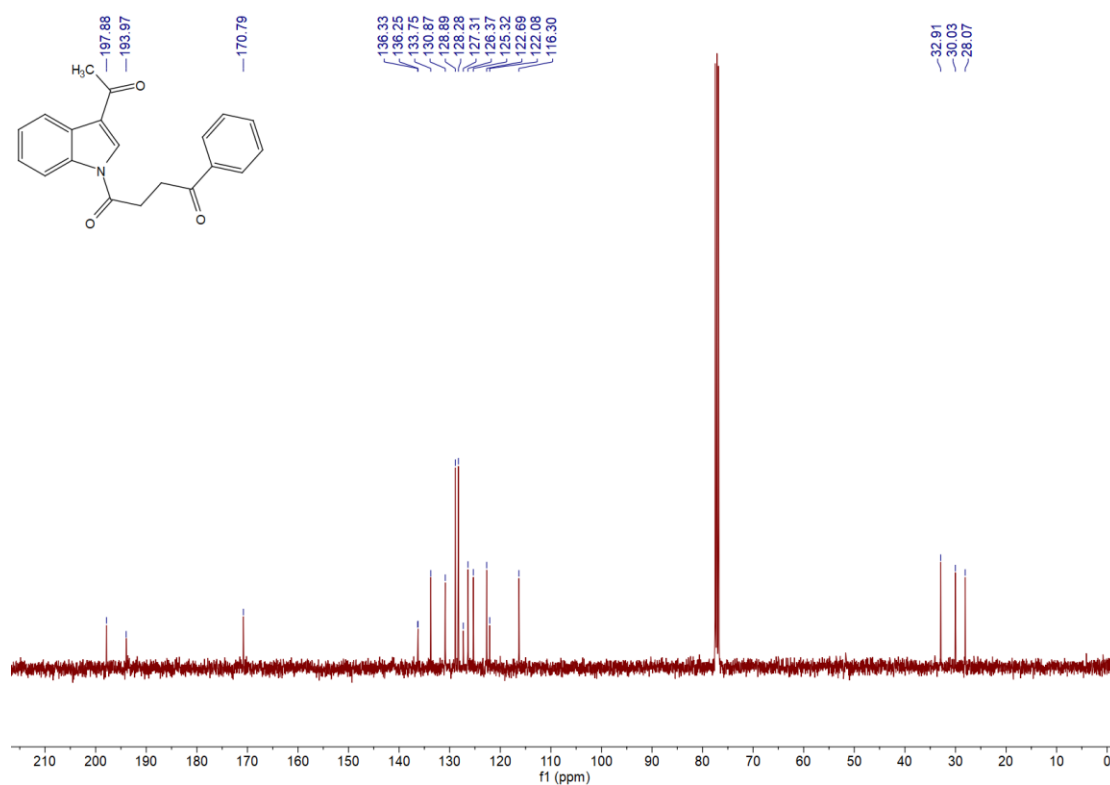

# <sup>1</sup>H NMR Spectrum of 1s

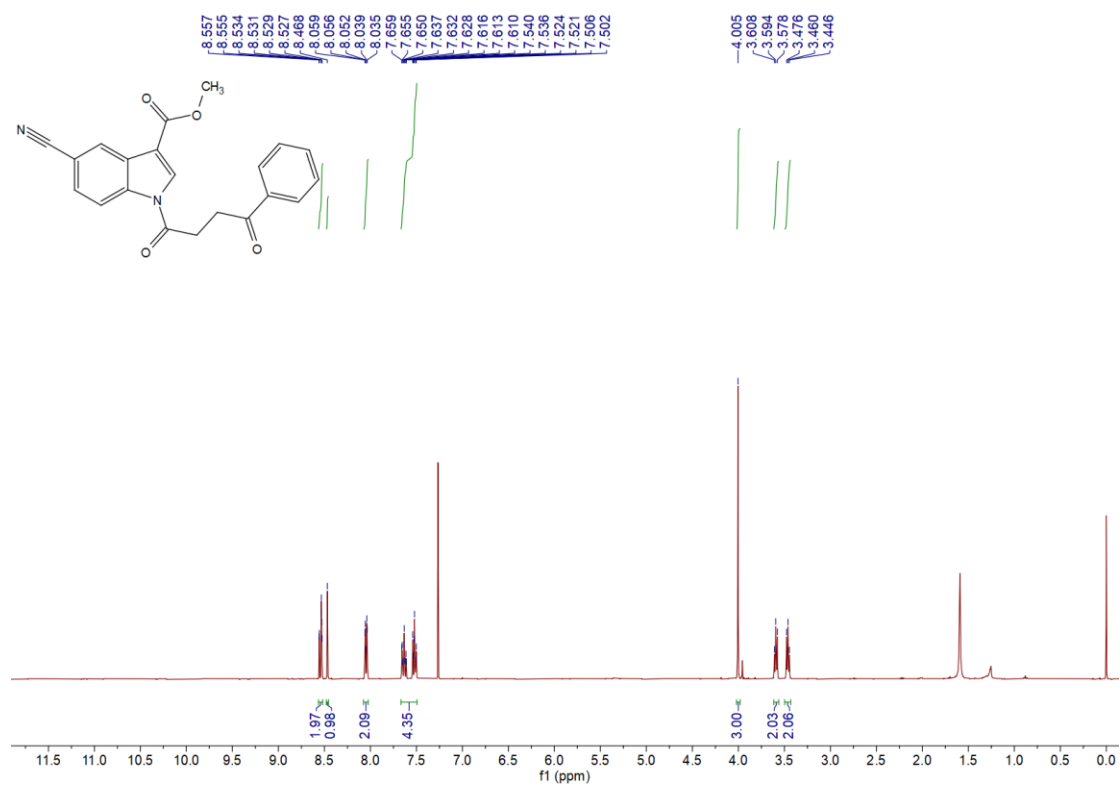

# <sup>13</sup>C NMR Spectrum of 1s

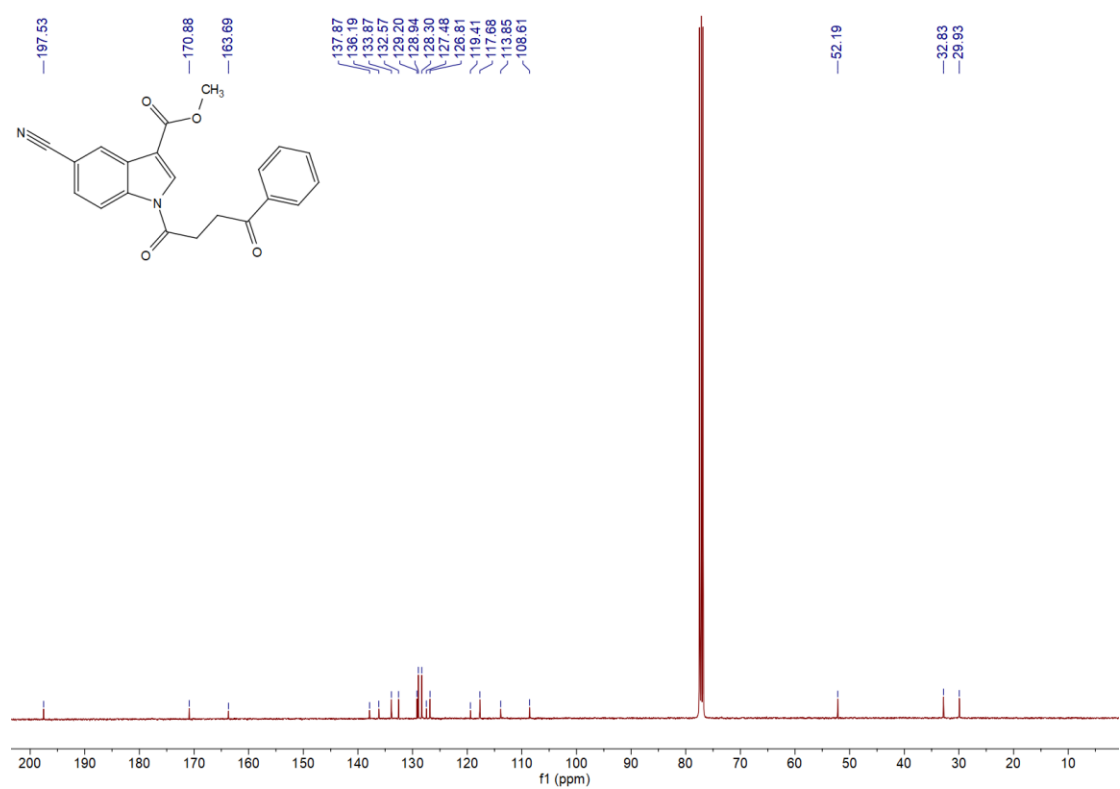

### <sup>1</sup>H NMR Spectrum of **1t**

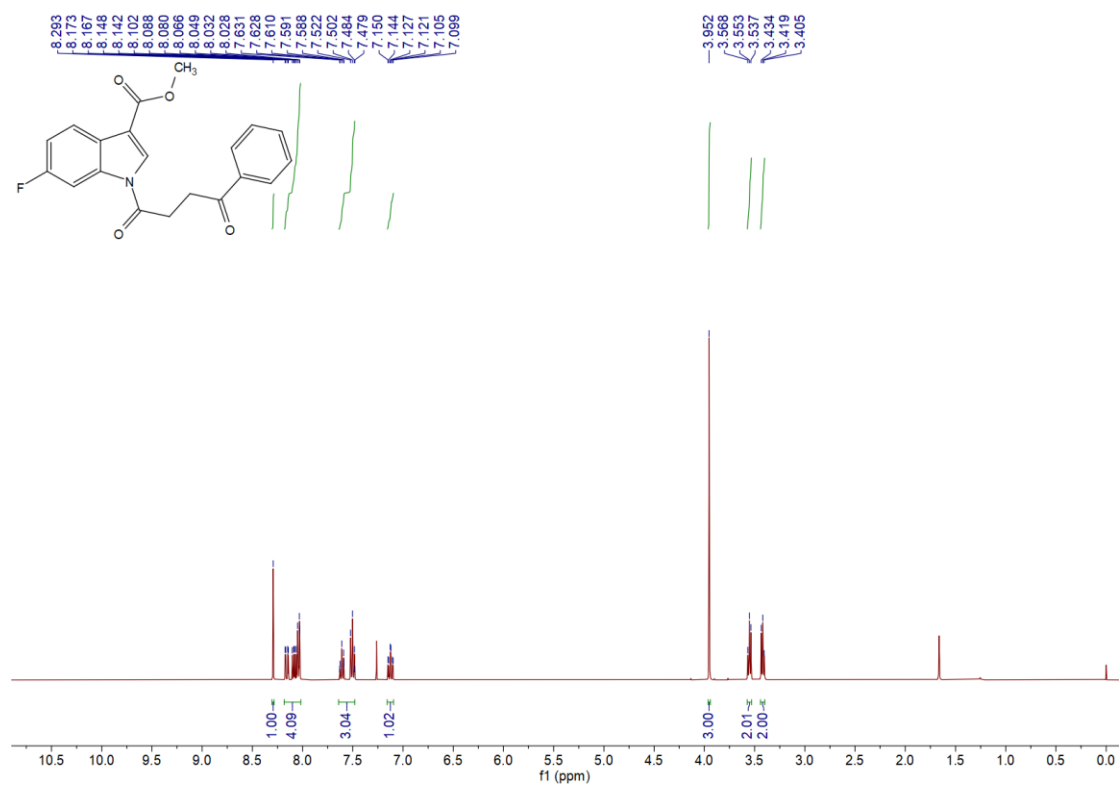

### <sup>13</sup>C NMR Spectrum of **1t**

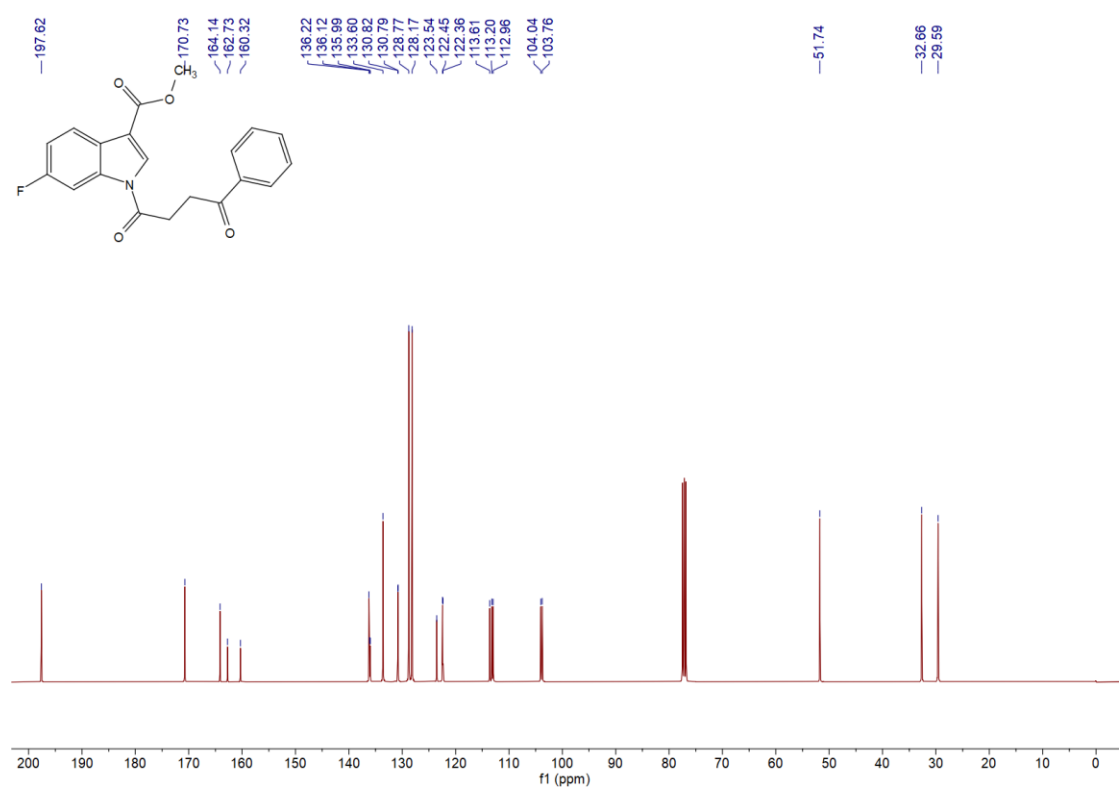

### <sup>19</sup>F NMR Spectrum of **1t**

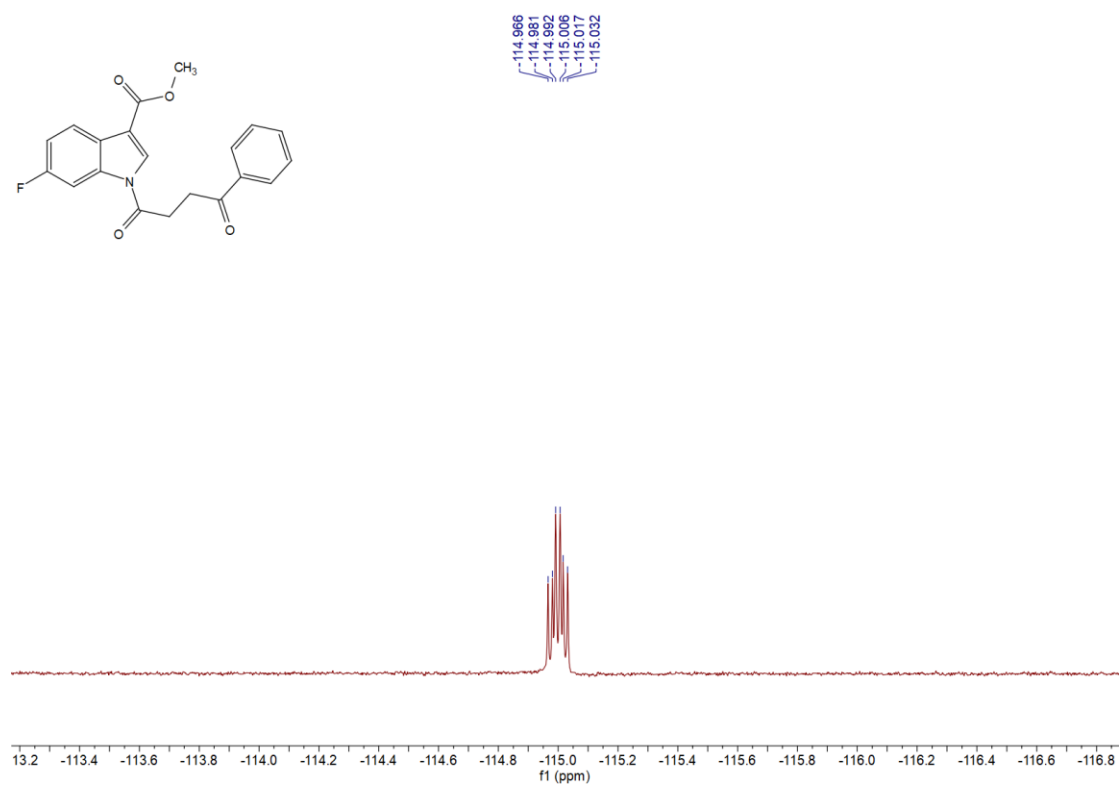

### <sup>1</sup>H NMR Spectrum of **1u**

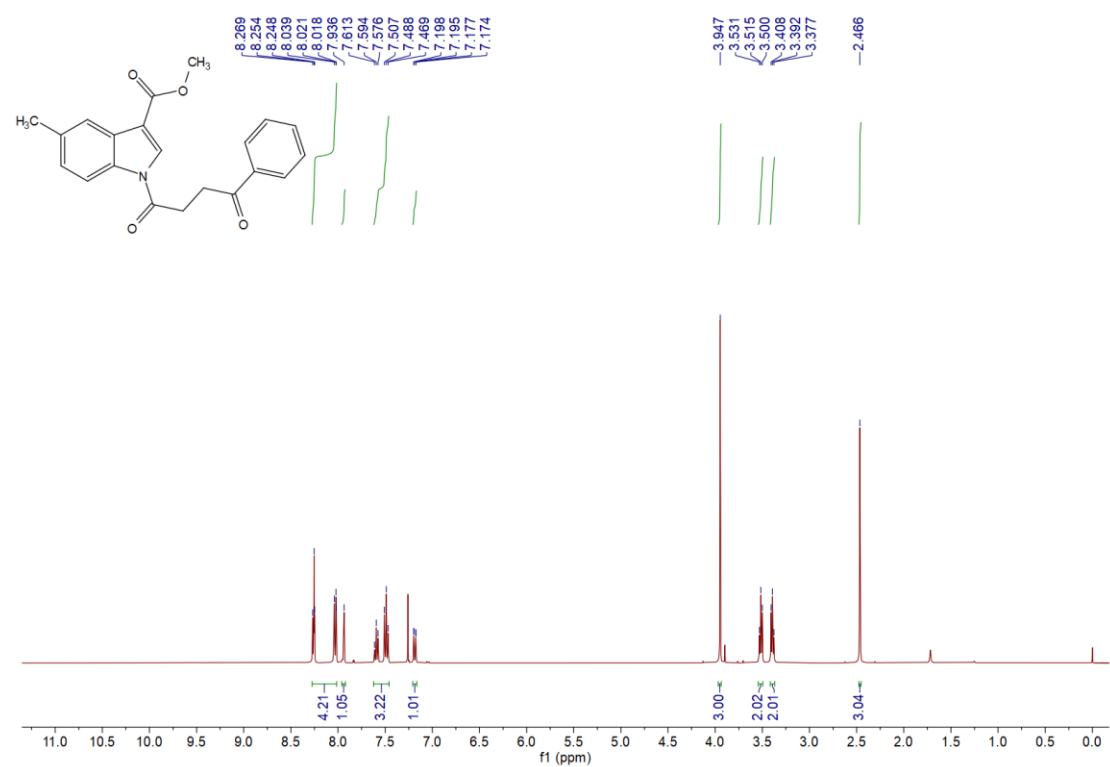

### <sup>13</sup>C NMR Spectrum of **1u**

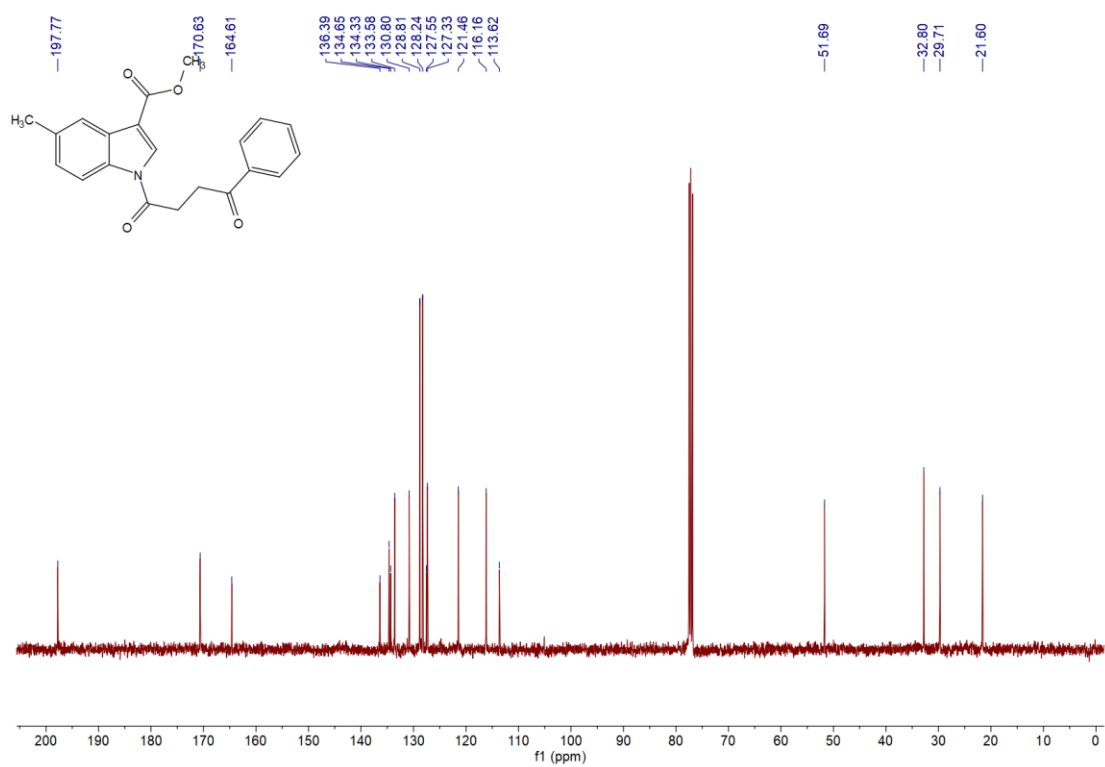

### <sup>1</sup>H NMR Spectrum of **2a**

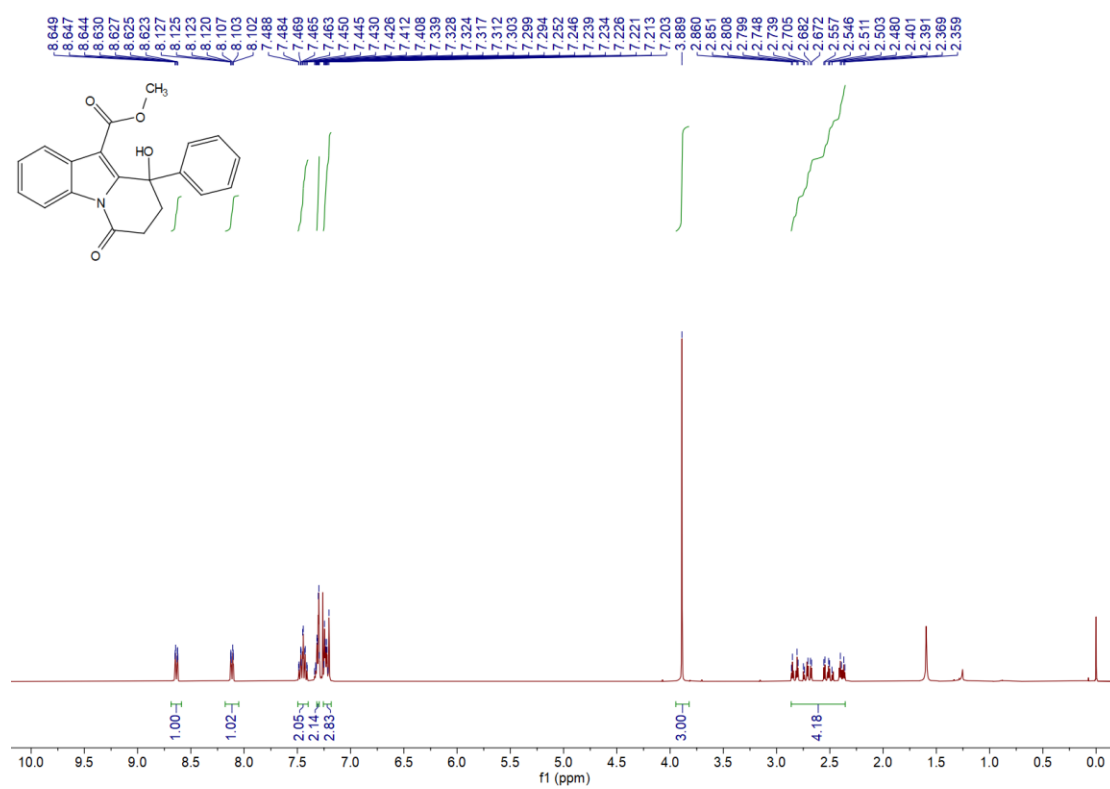

### <sup>13</sup>C NMR Spectrum of 2a

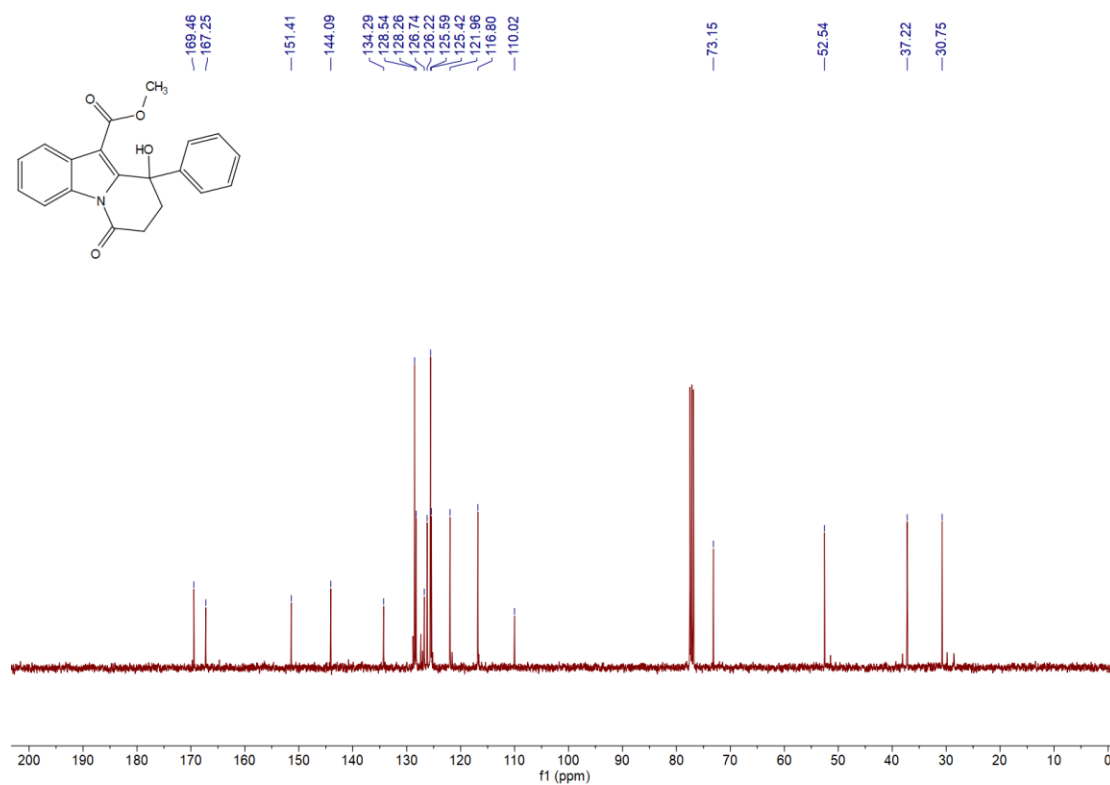

### <sup>1</sup>H NMR Spectrum of 2b

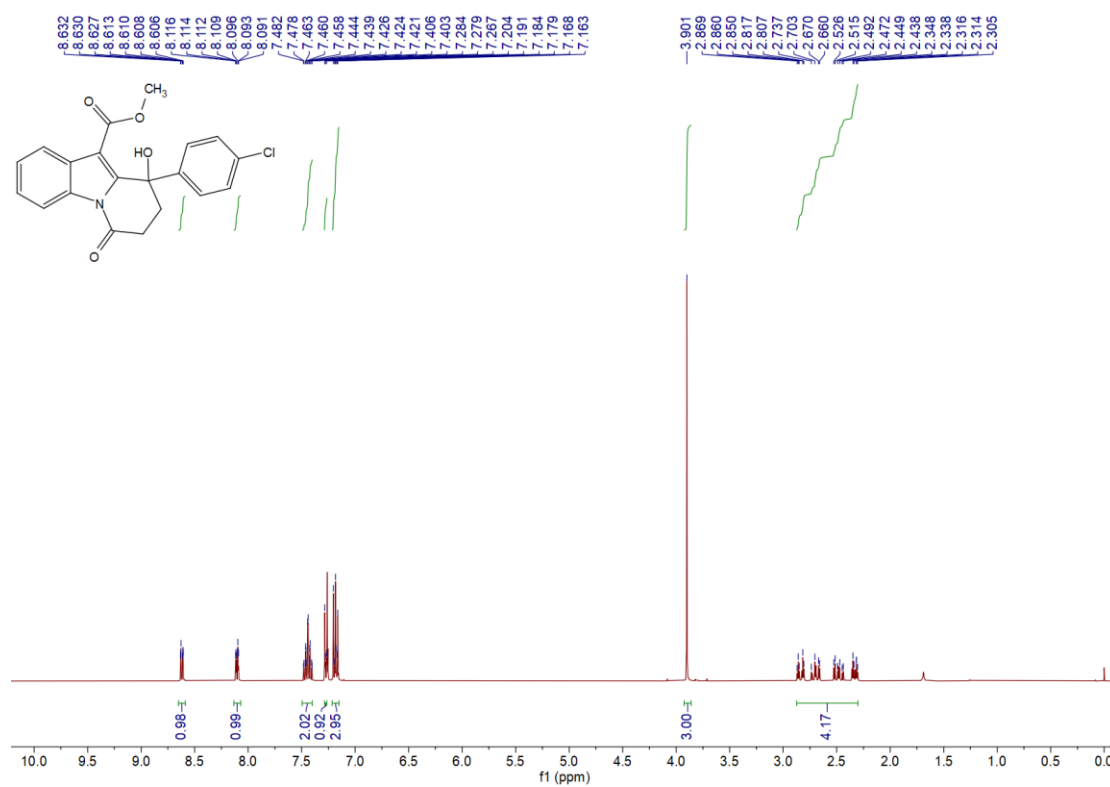

### <sup>13</sup>C NMR Spectrum of **2b**

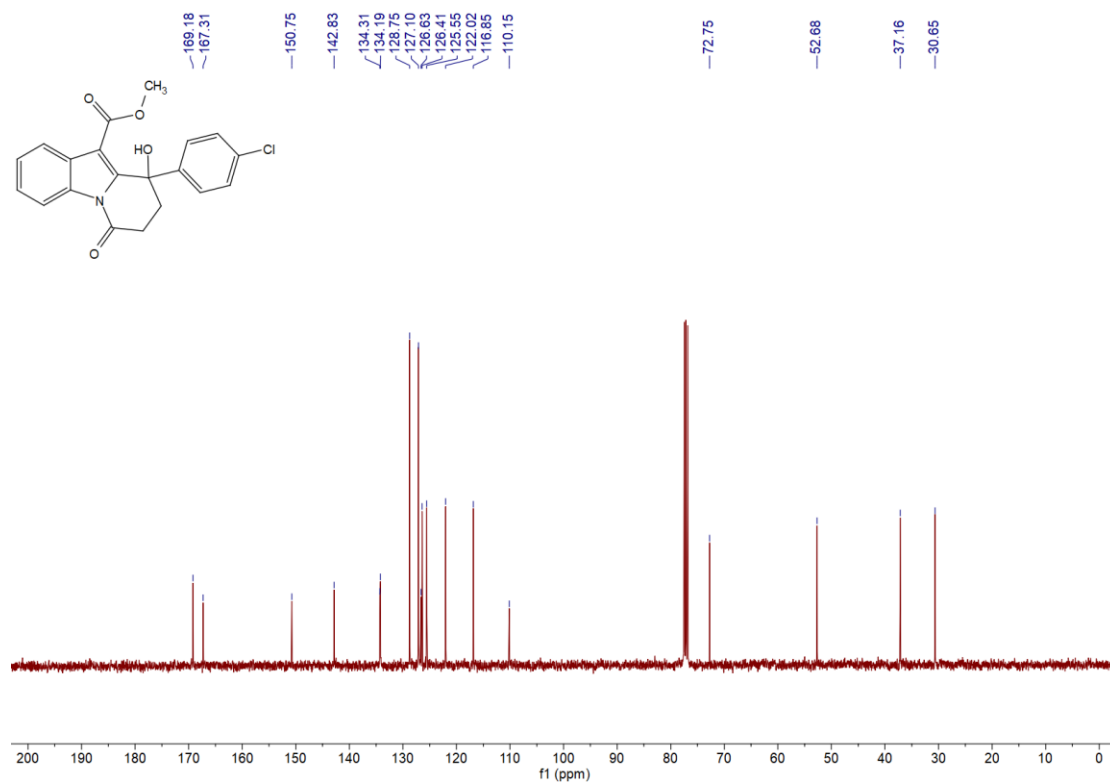

### <sup>1</sup>H NMR Spectrum of **2c**

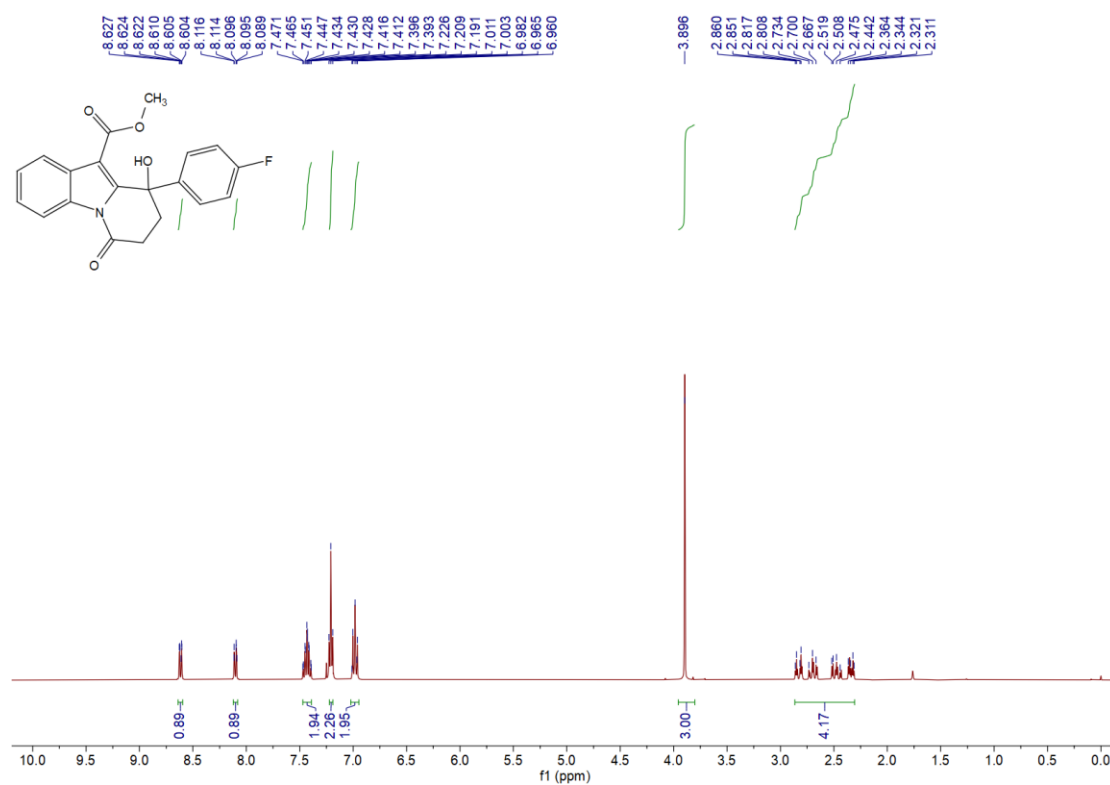

### <sup>13</sup>C NMR Spectrum of **2c**

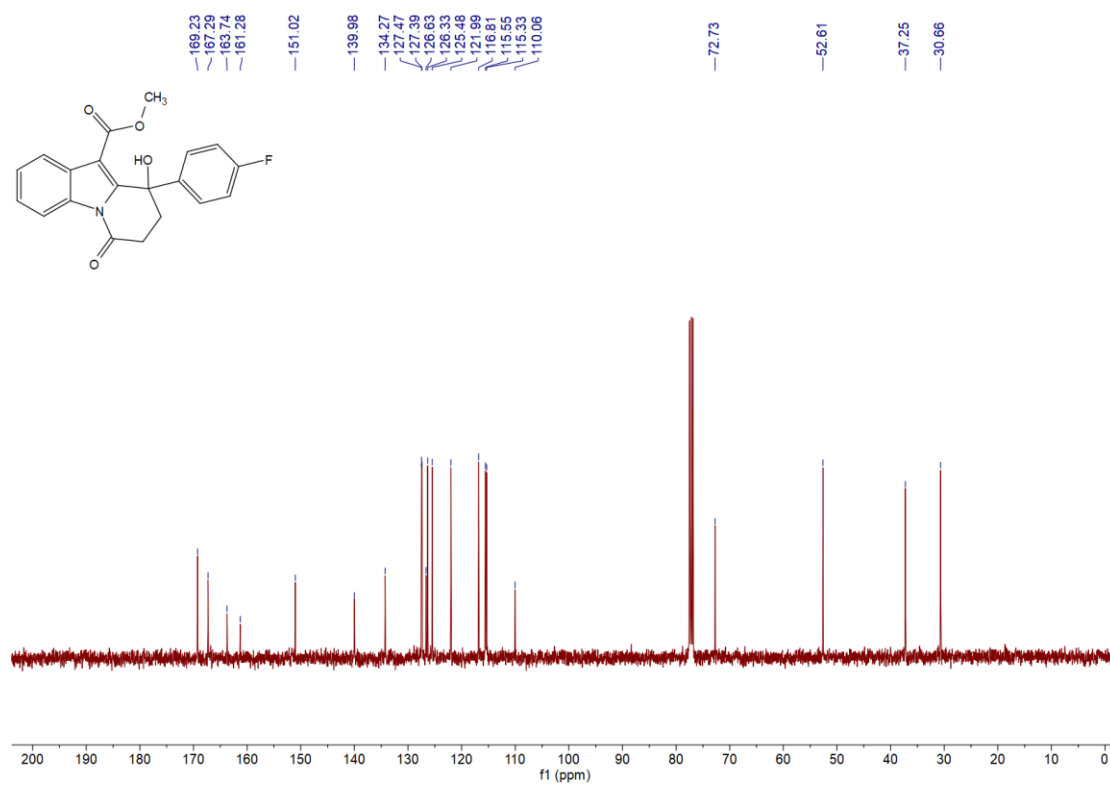

### <sup>19</sup>F NMR Spectrum of **2c**

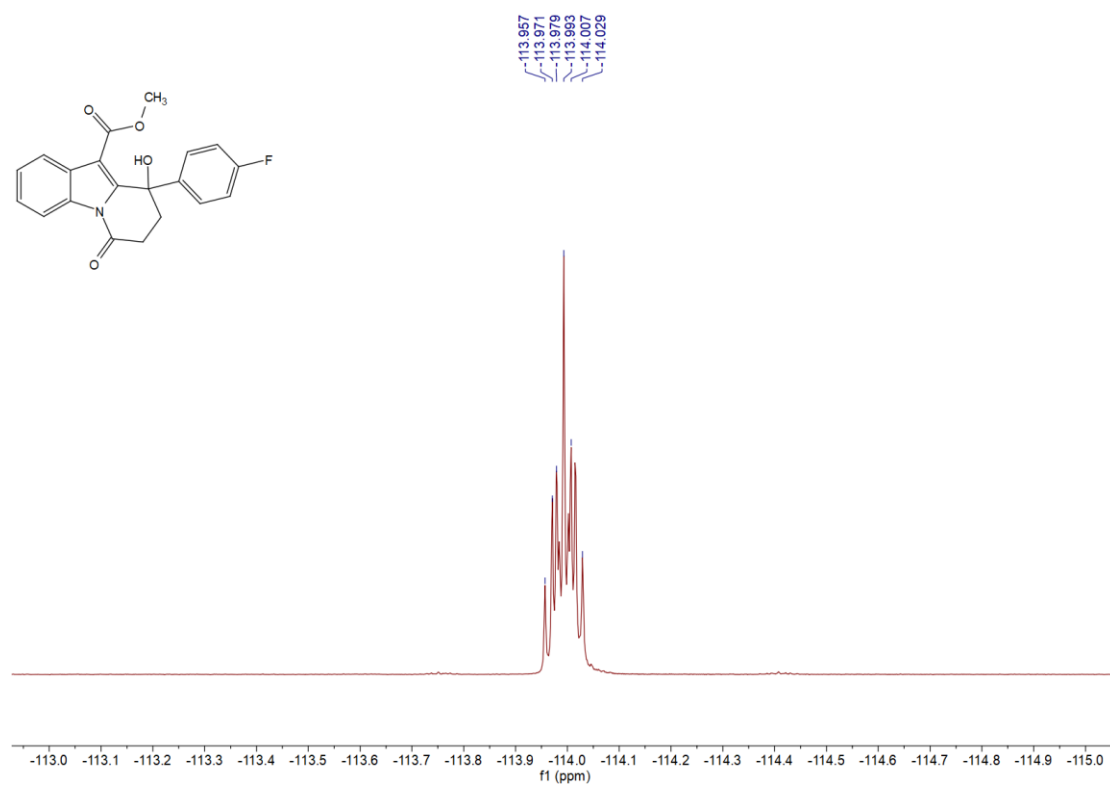



### <sup>1</sup>H NMR Spectrum of **2d**

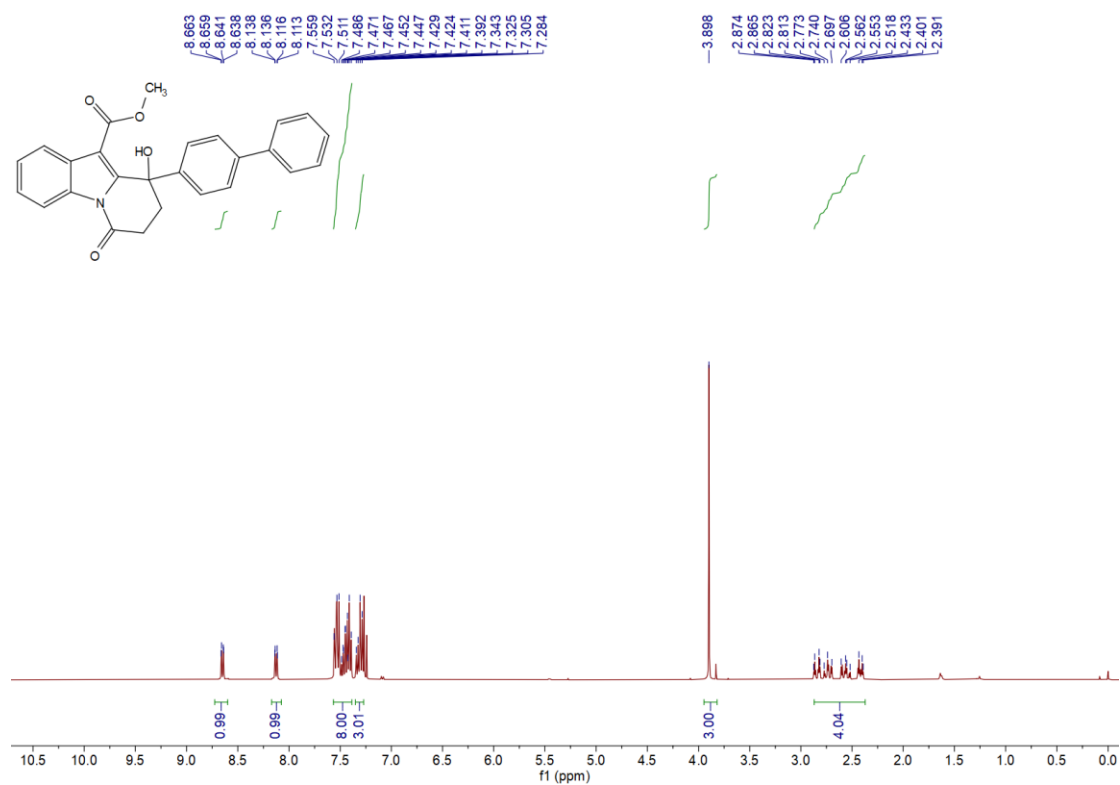

### <sup>13</sup>C NMR Spectrum of **2d**

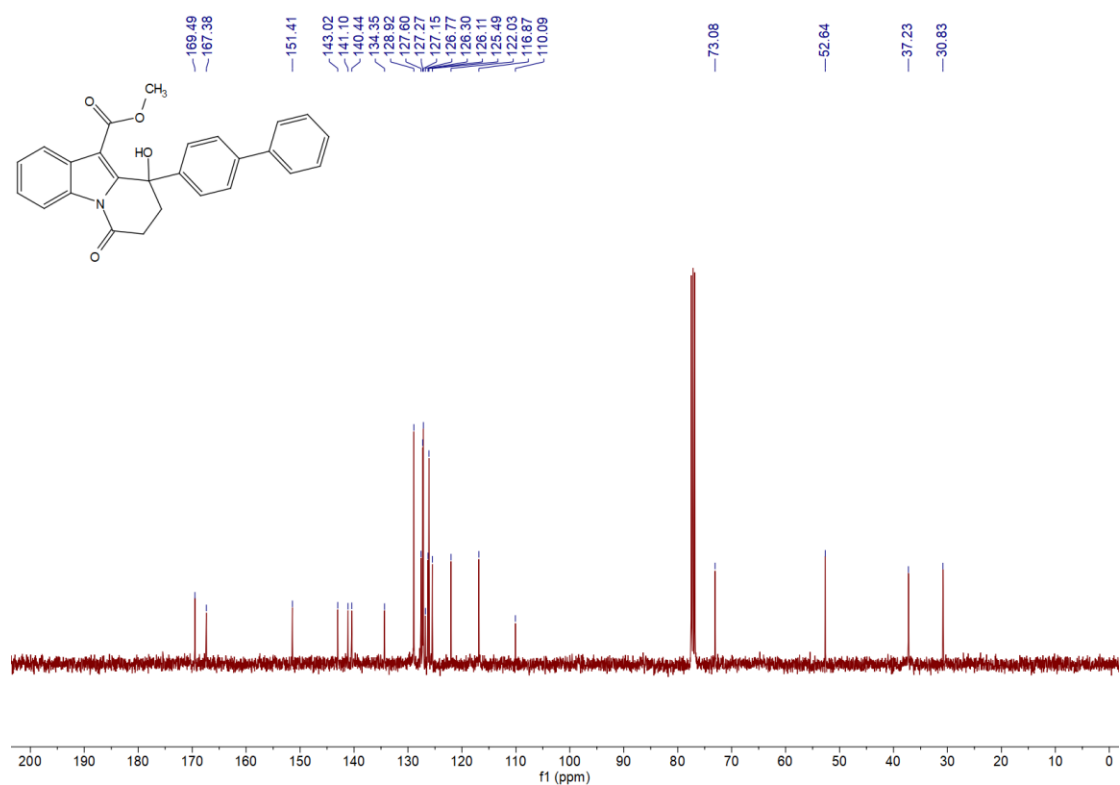

### <sup>1</sup>H NMR Spectrum of 2e

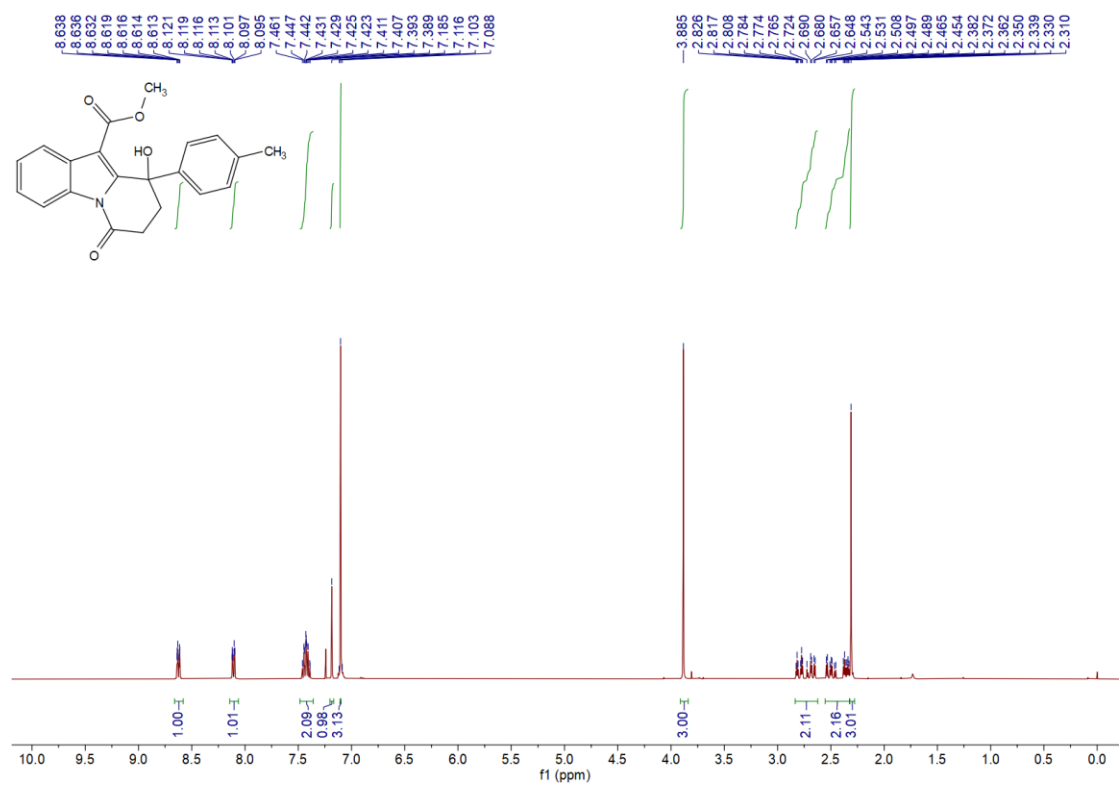

### <sup>13</sup>C NMR Spectrum of 2e

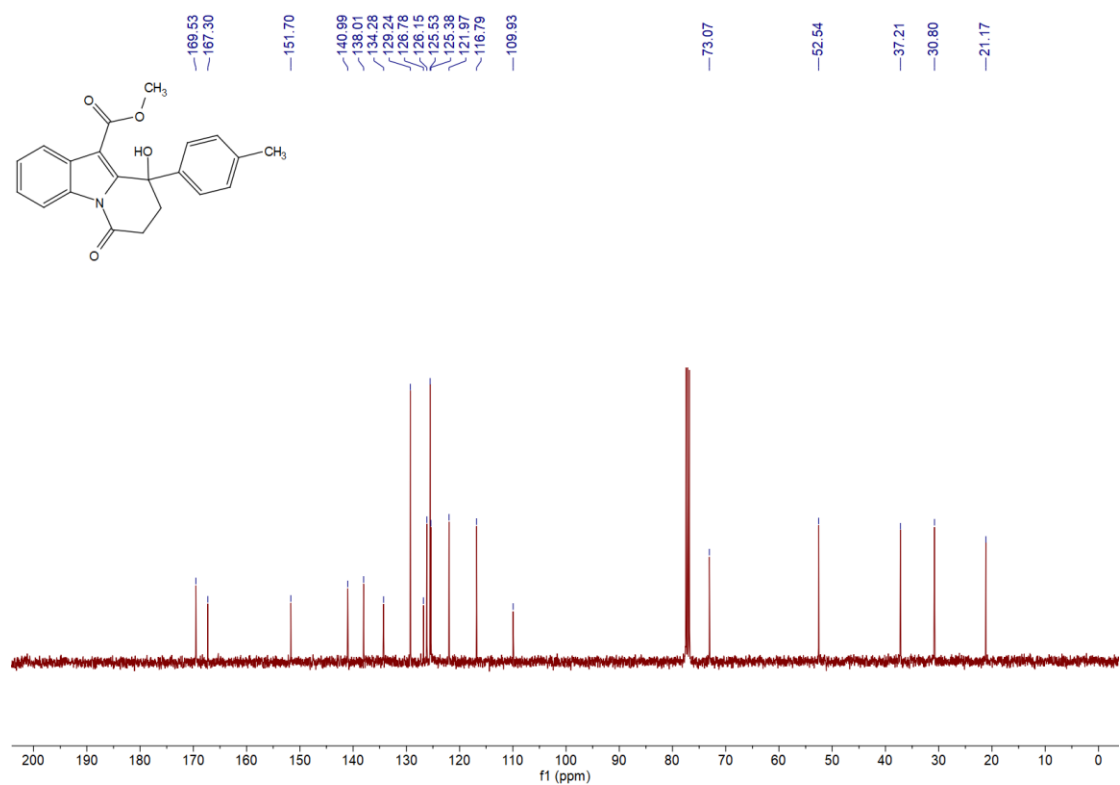

### <sup>1</sup>H NMR Spectrum of **2f**

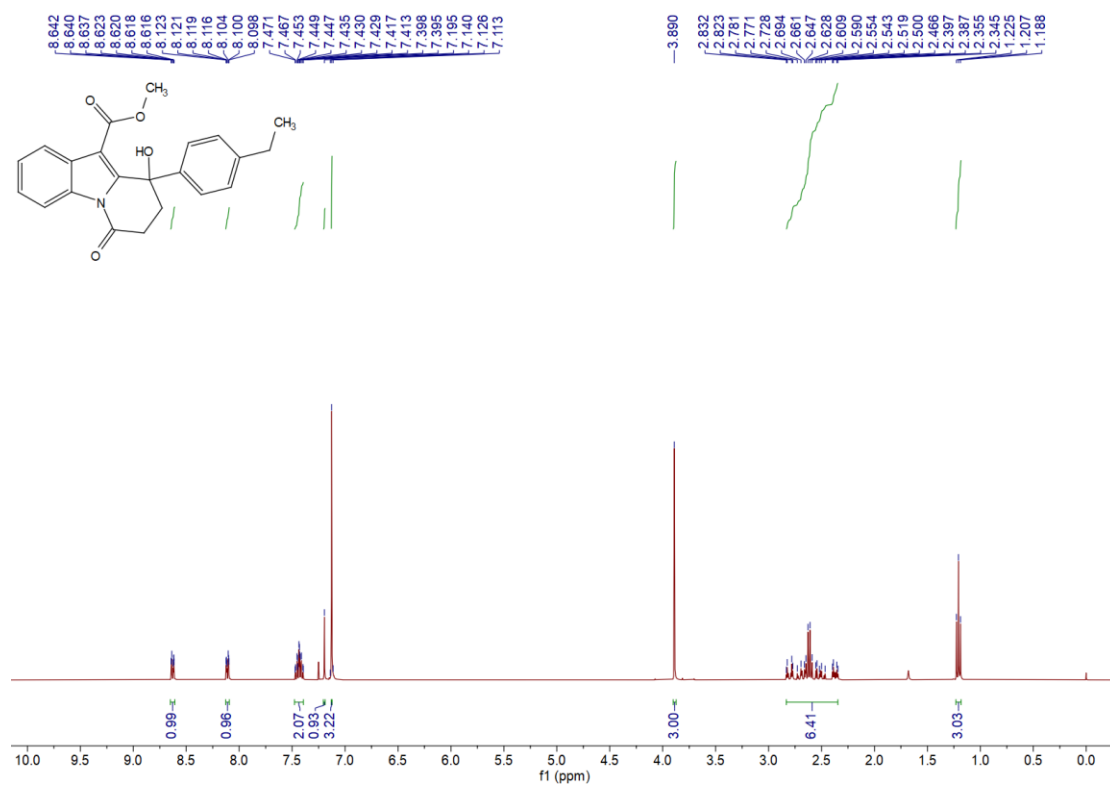

### <sup>13</sup>C NMR Spectrum of **2f**

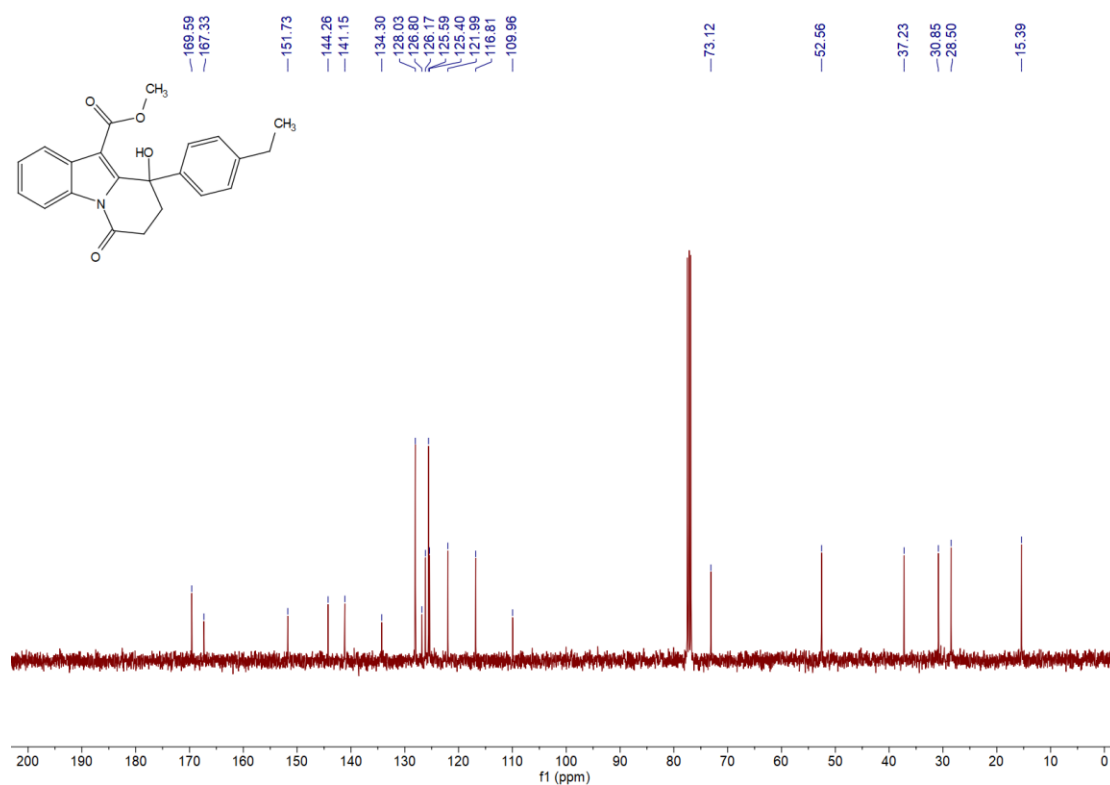

# <sup>1</sup>H NMR Spectrum of 2g

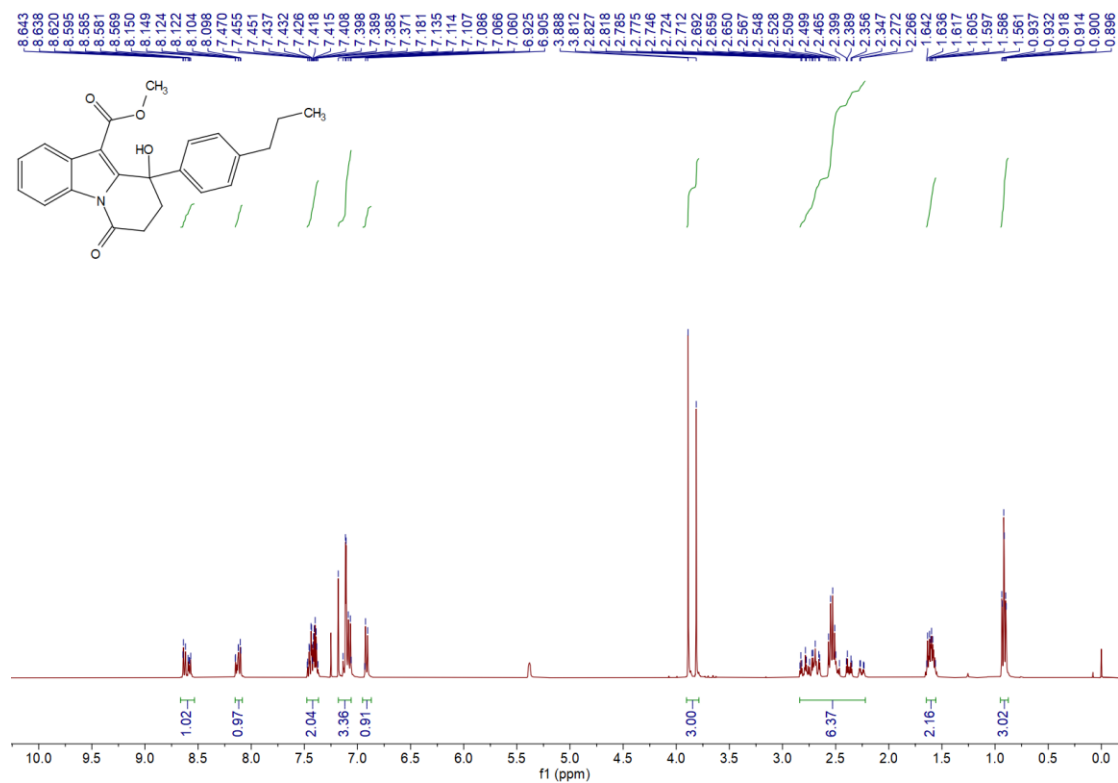

# <sup>13</sup>C NMR Spectrum of 2g

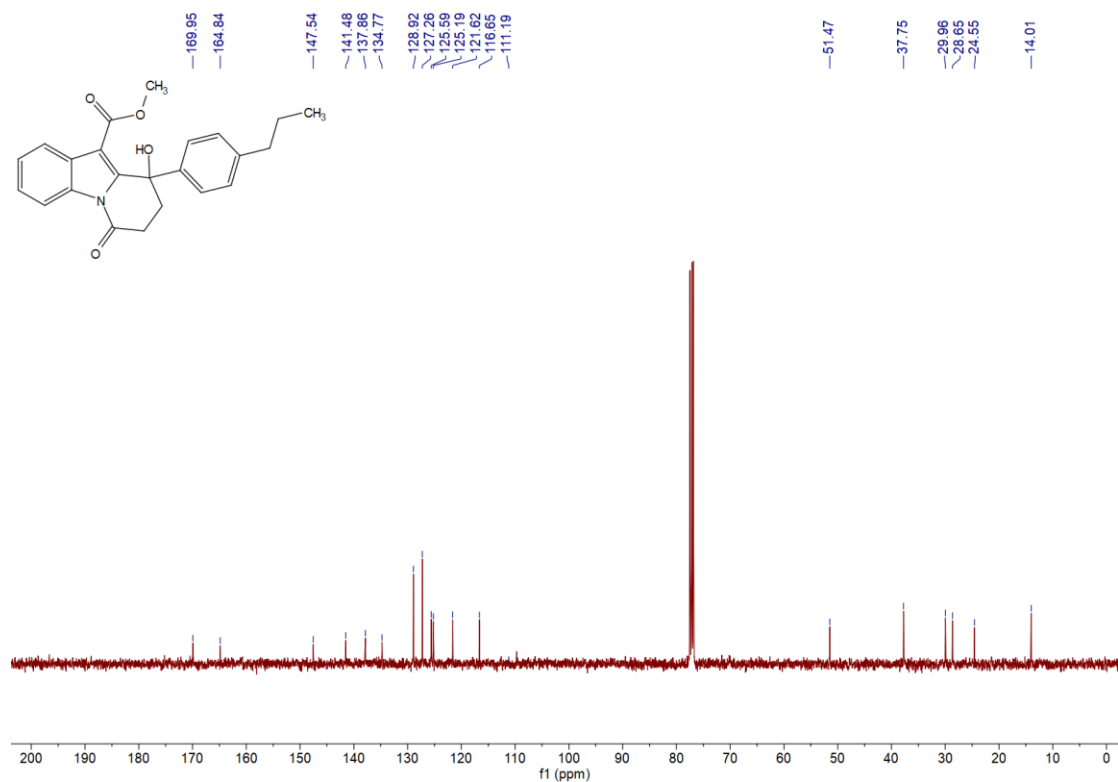

### <sup>1</sup>H NMR Spectrum of **2h**

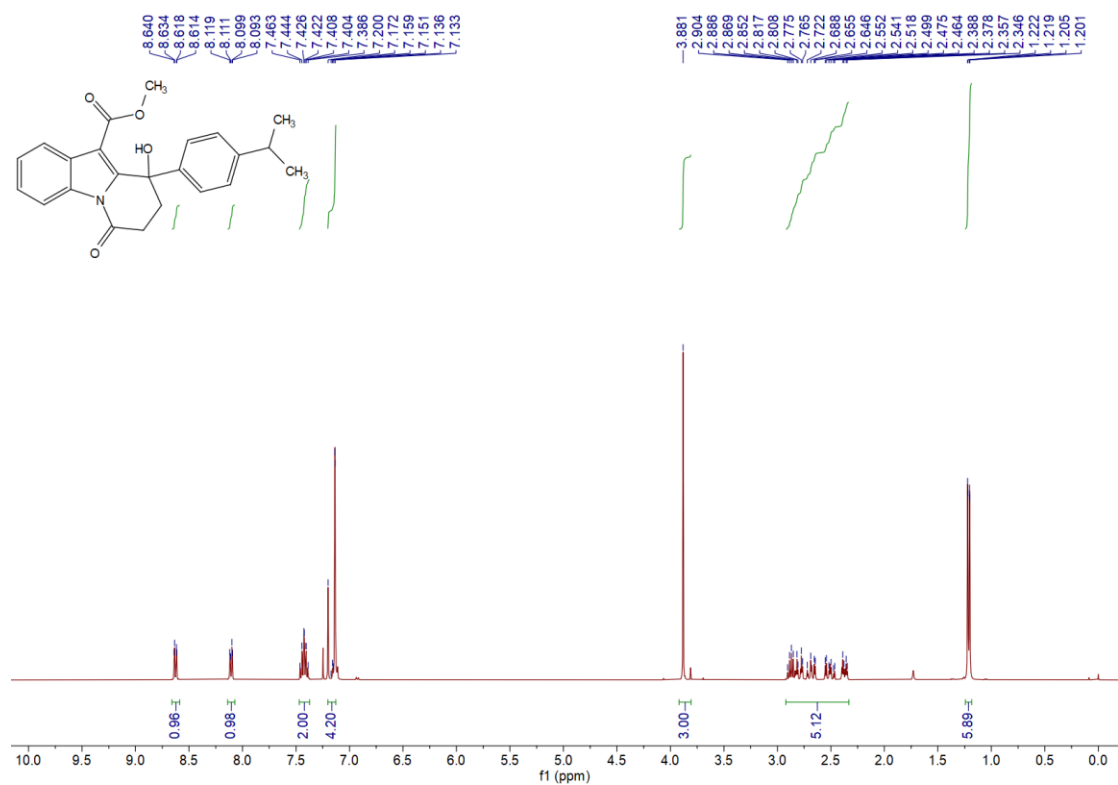

### <sup>13</sup>C NMR Spectrum of **2h**

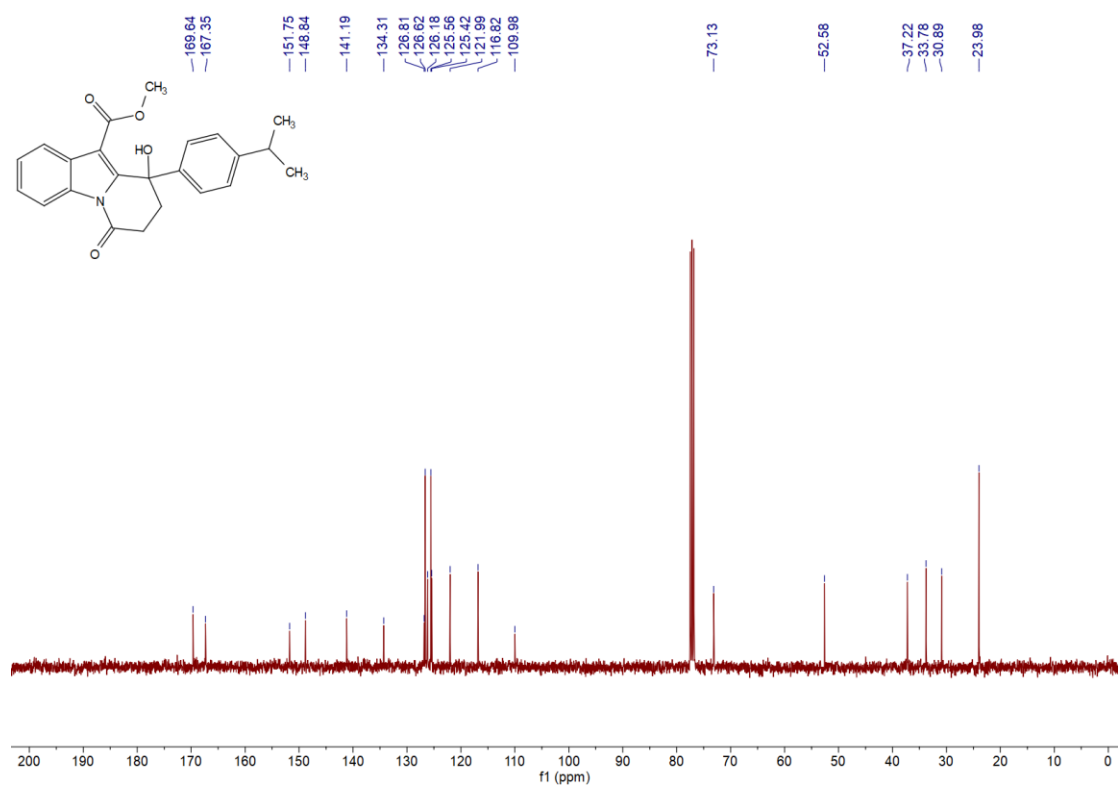

### <sup>1</sup>H NMR Spectrum of **2i**

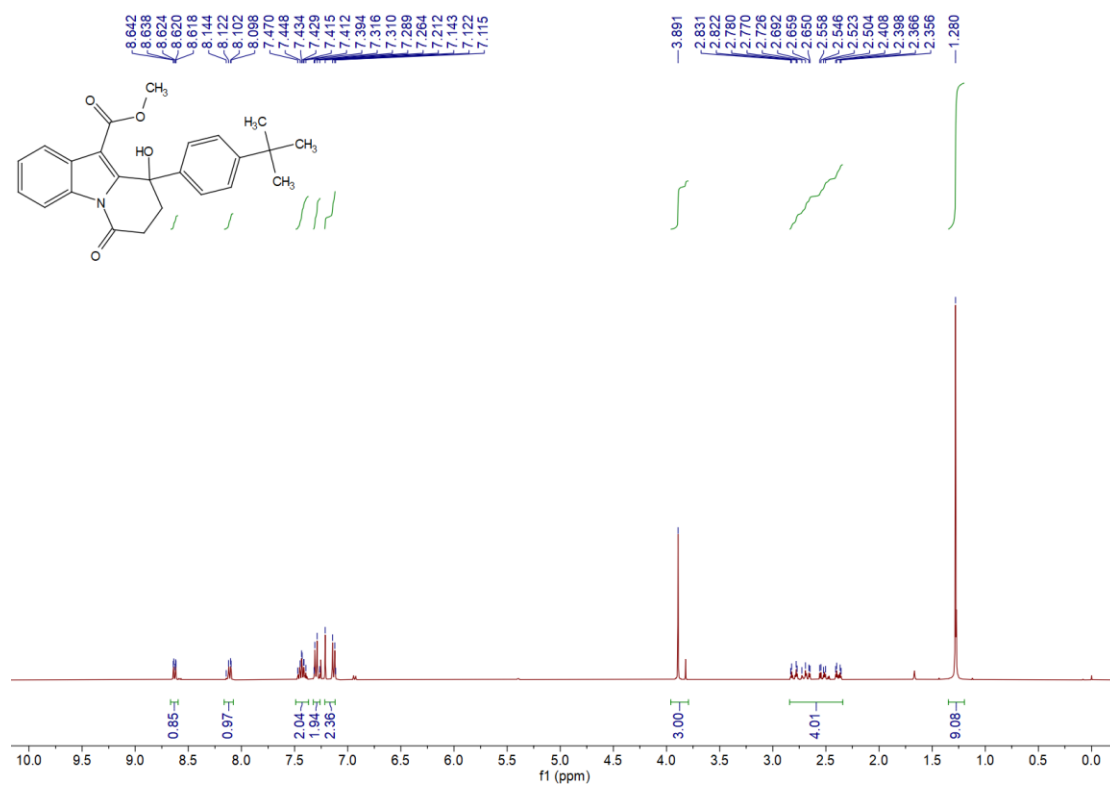

### <sup>13</sup>C NMR Spectrum of **2i**

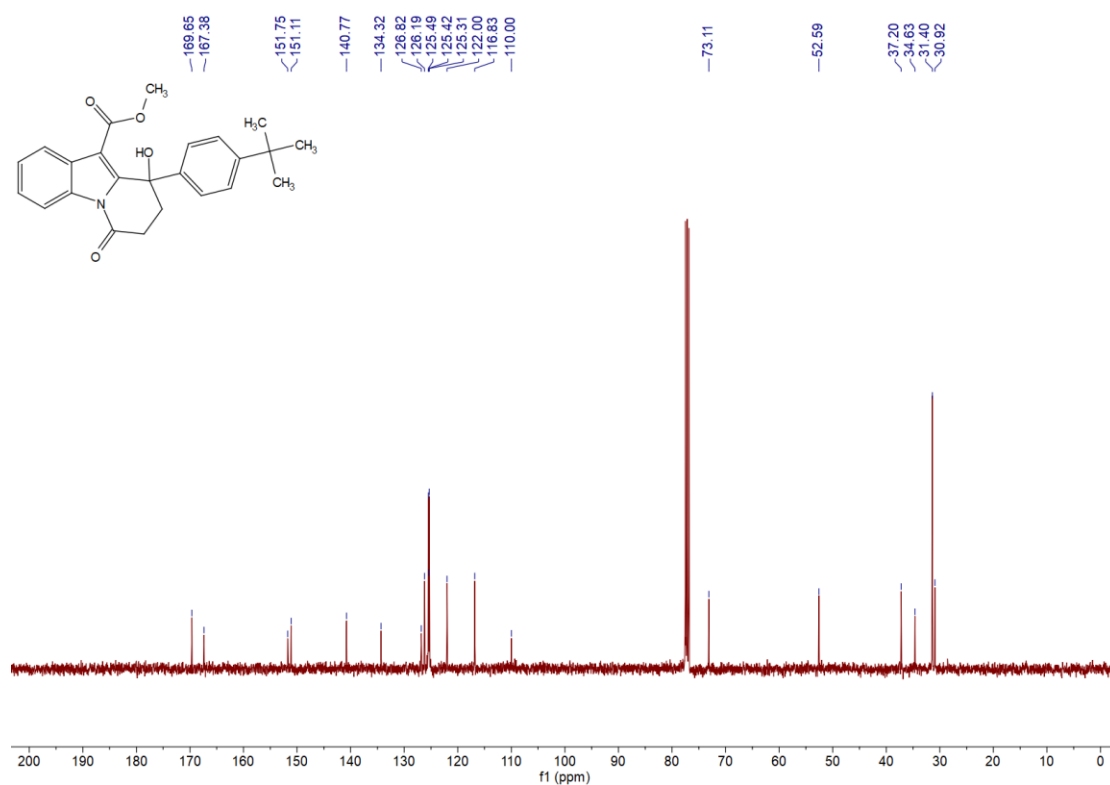

### <sup>1</sup>H NMR Spectrum of **2j**

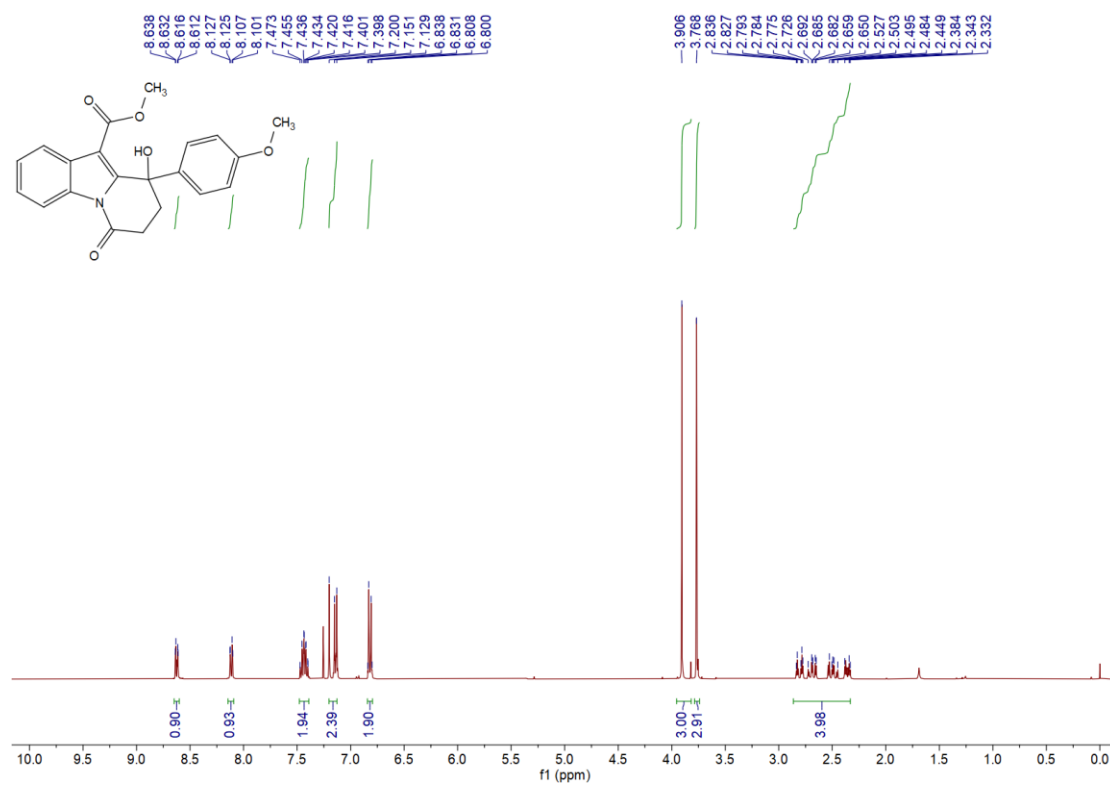

### <sup>13</sup>C NMR Spectrum of **2j**

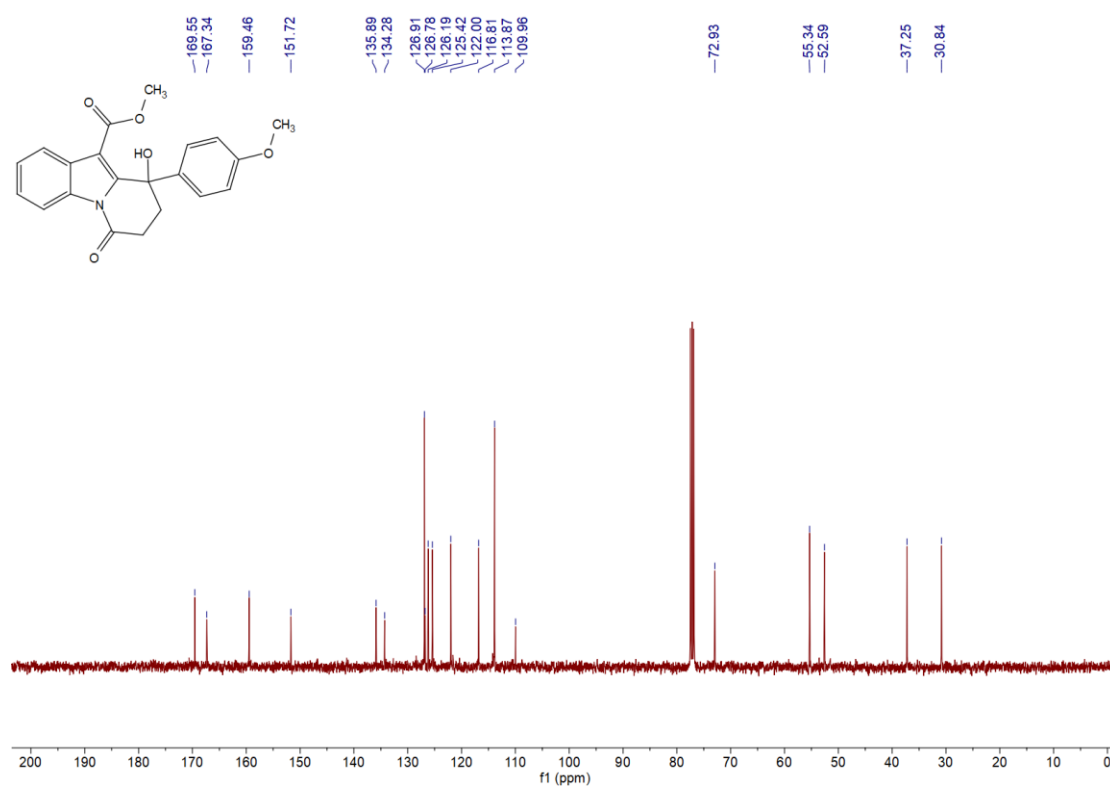

# <sup>1</sup>H NMR Spectrum of 2k

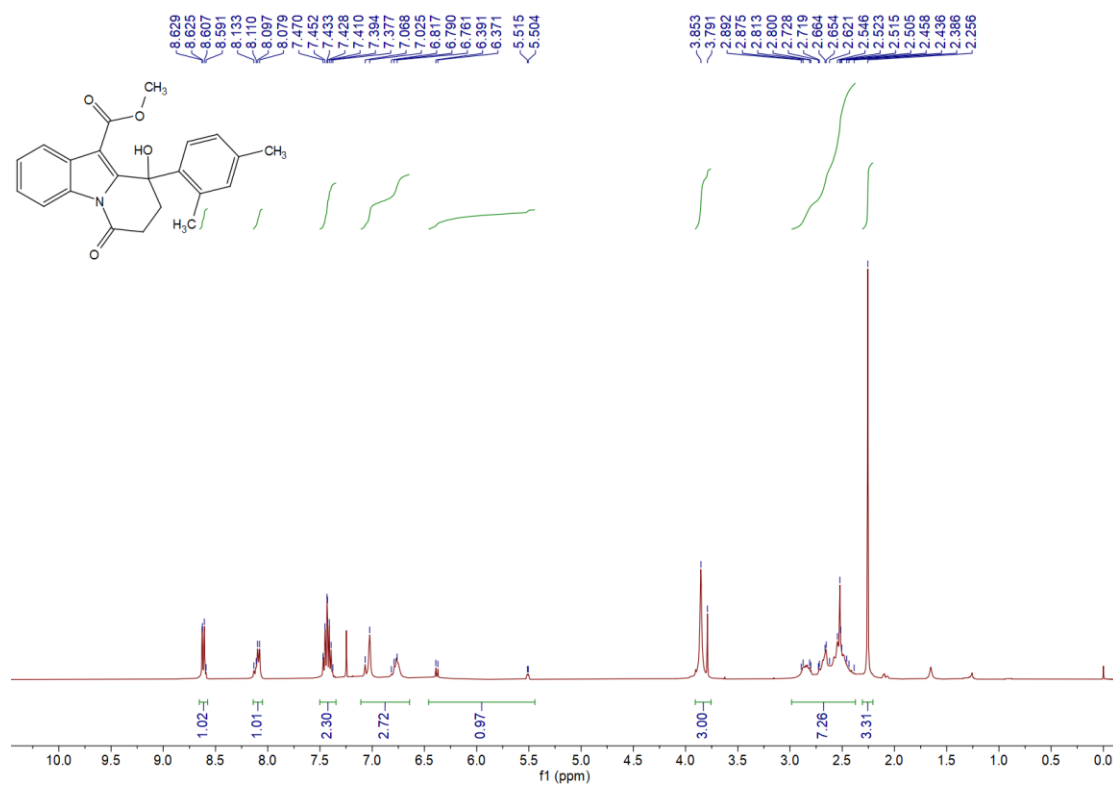

# <sup>13</sup>C NMR Spectrum of 2k

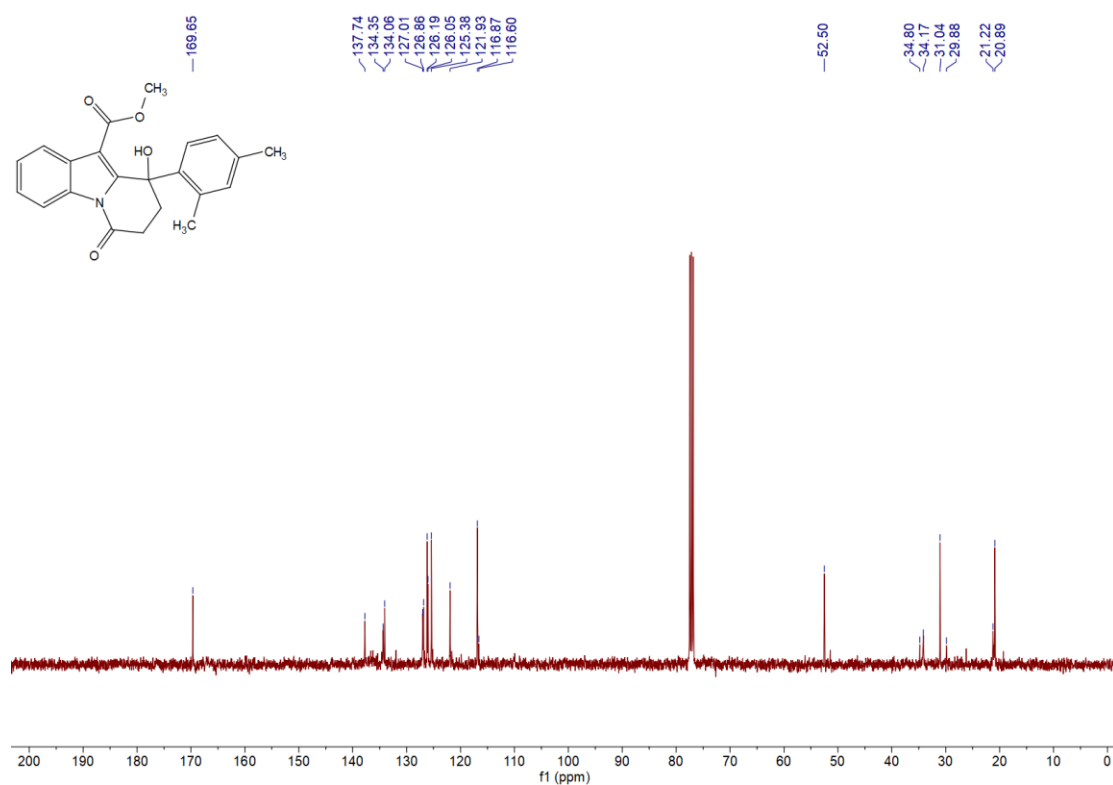



# <sup>1</sup>H NMR Spectrum of **21**

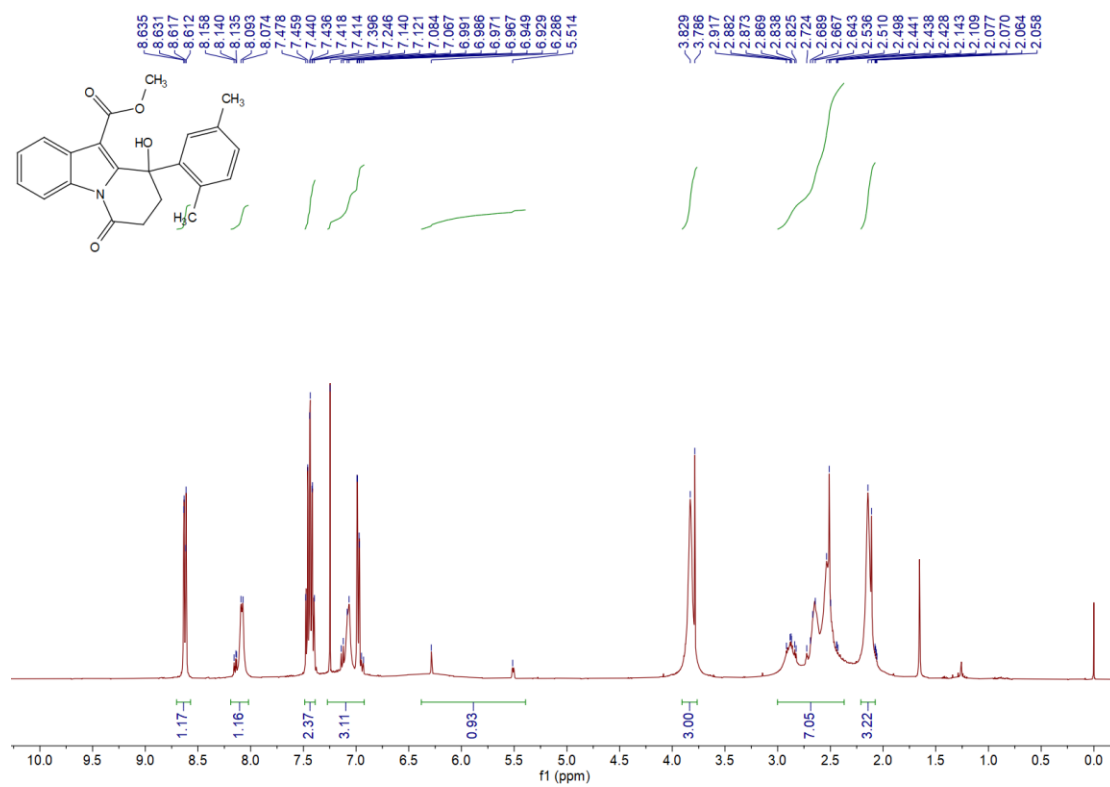

# <sup>13</sup>C NMR Spectrum of **21**

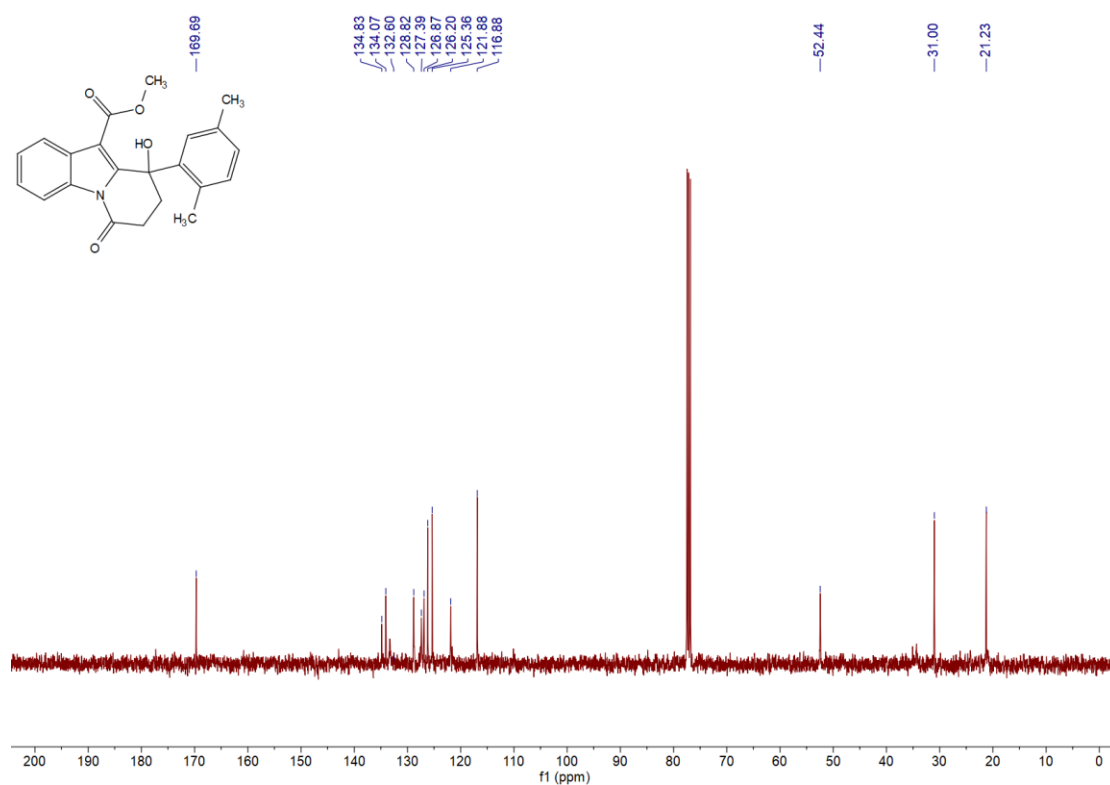

### <sup>1</sup>H NMR Spectrum of **2m**

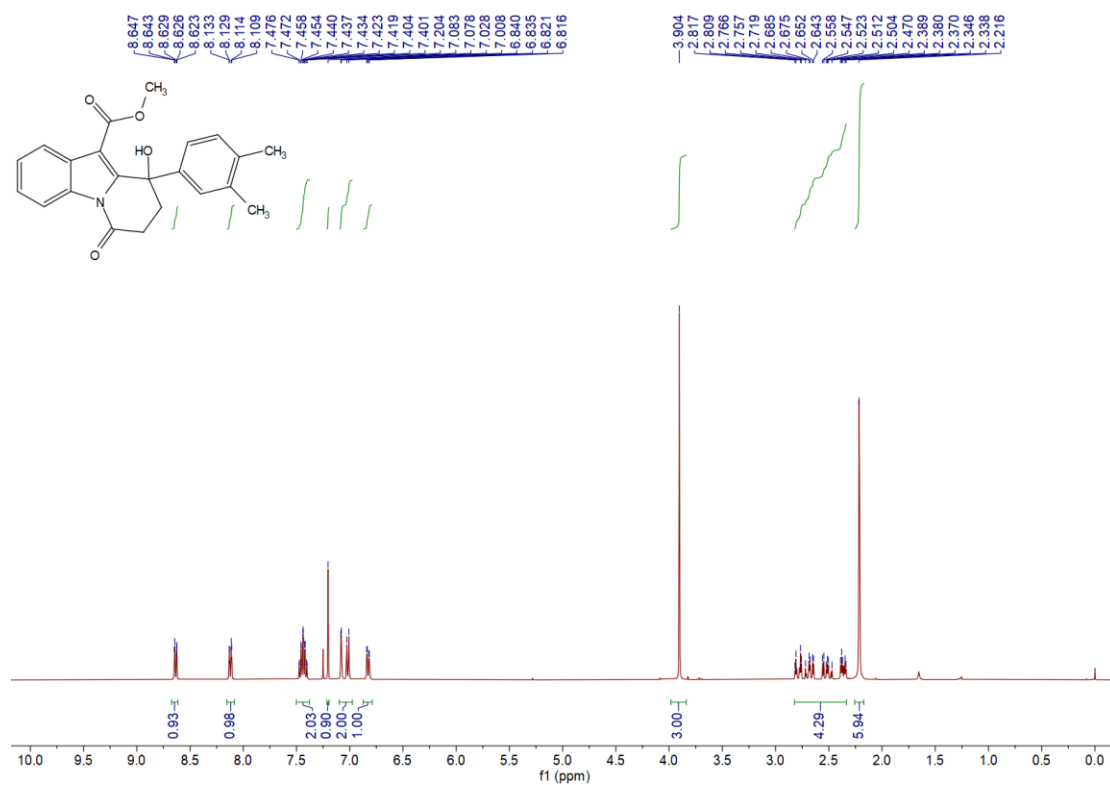

### <sup>13</sup>C NMR Spectrum of **2m**

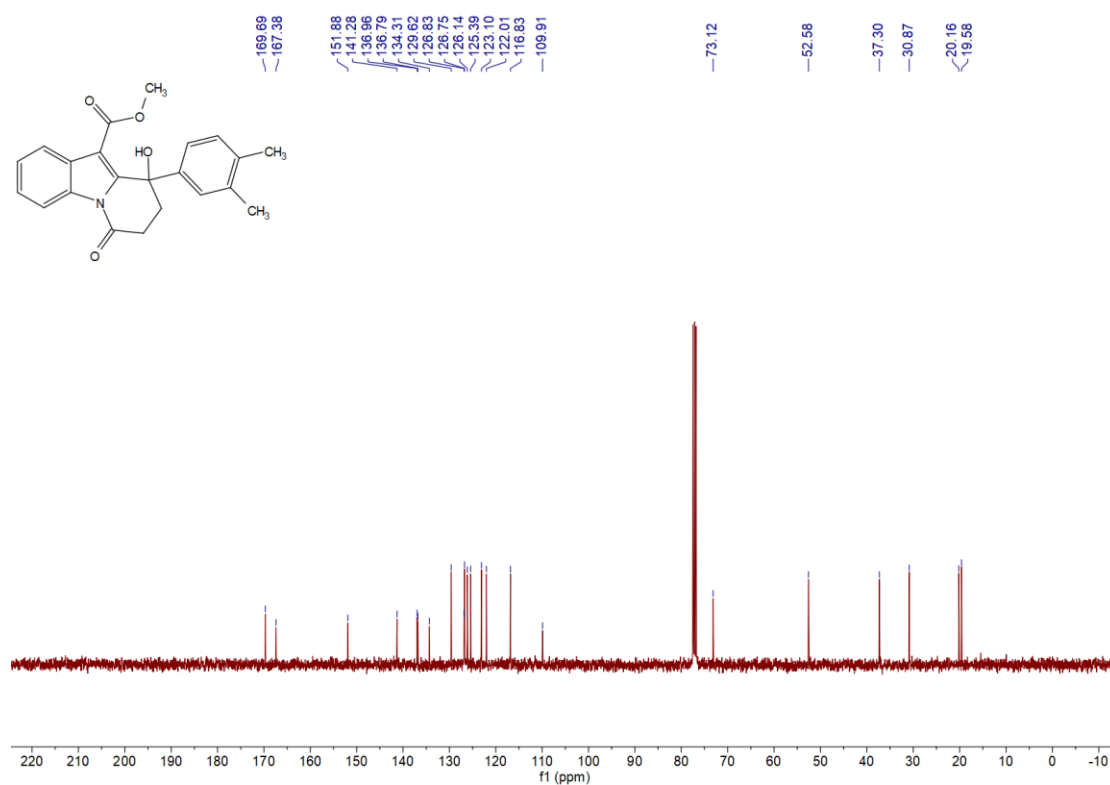

### <sup>1</sup>H NMR Spectrum of **2n**

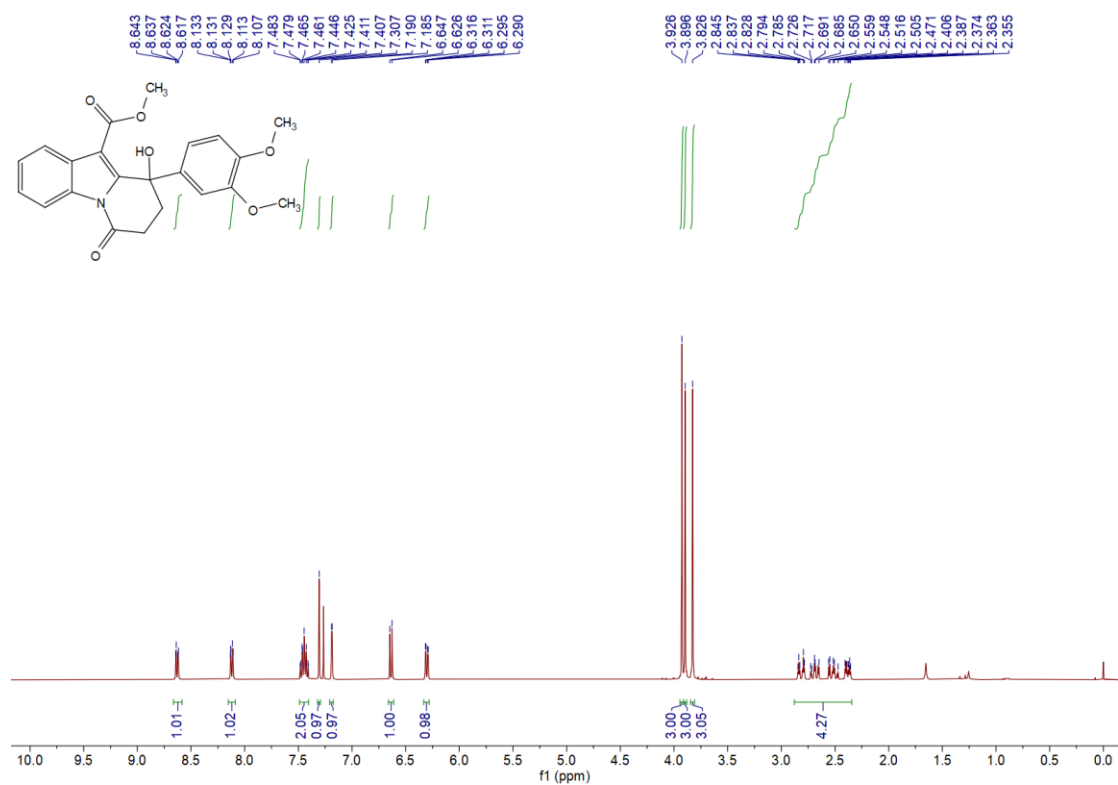

### <sup>13</sup>C NMR Spectrum of **2n**

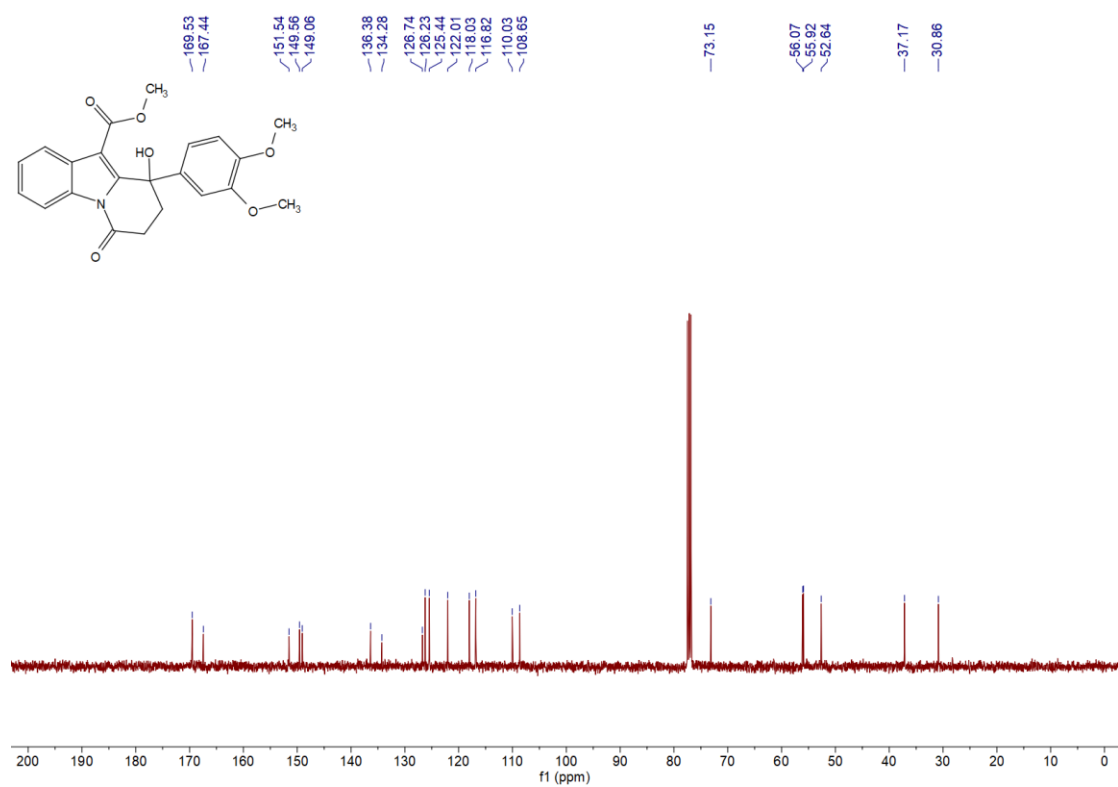

### <sup>1</sup>H NMR Spectrum of **20**

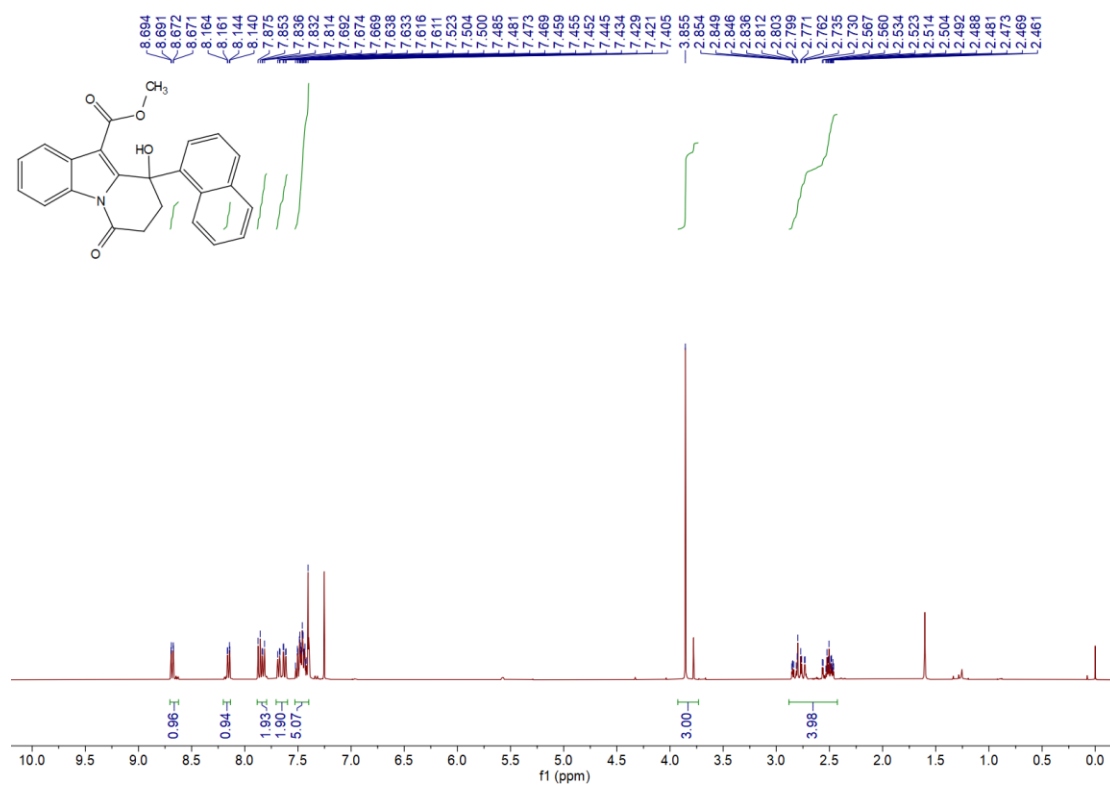

### <sup>13</sup>C NMR Spectrum of **20**

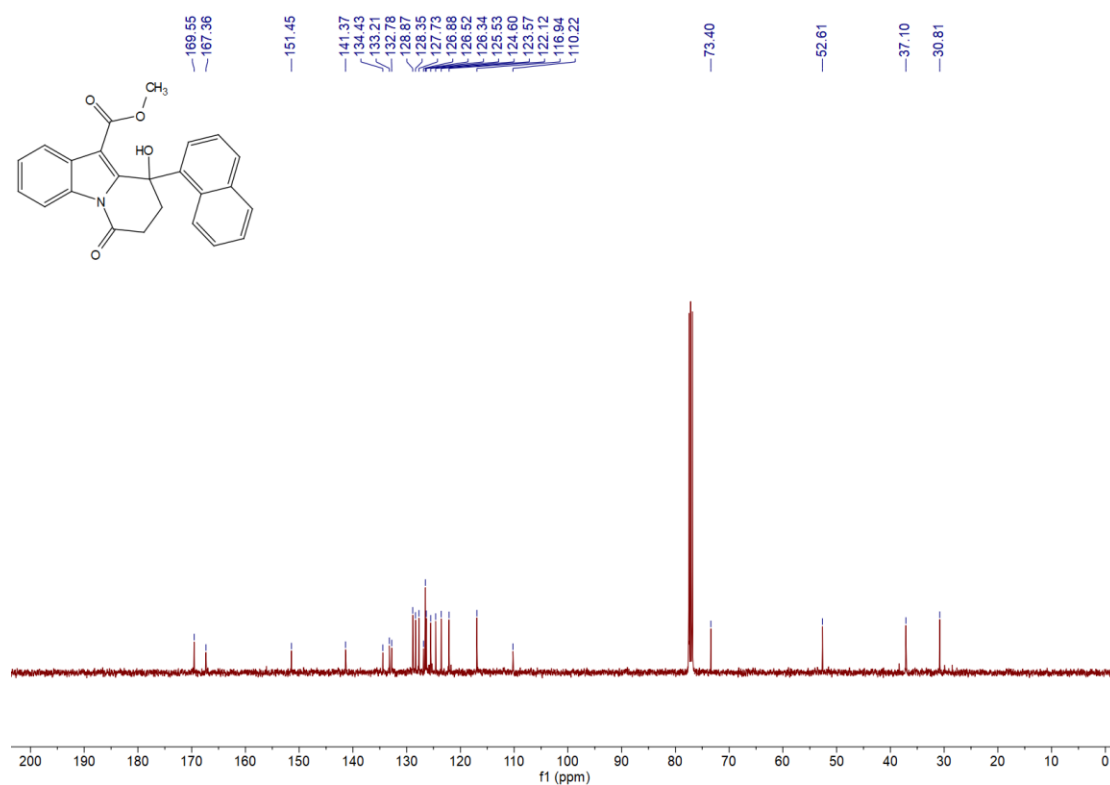

### <sup>1</sup>H NMR Spectrum of 2p

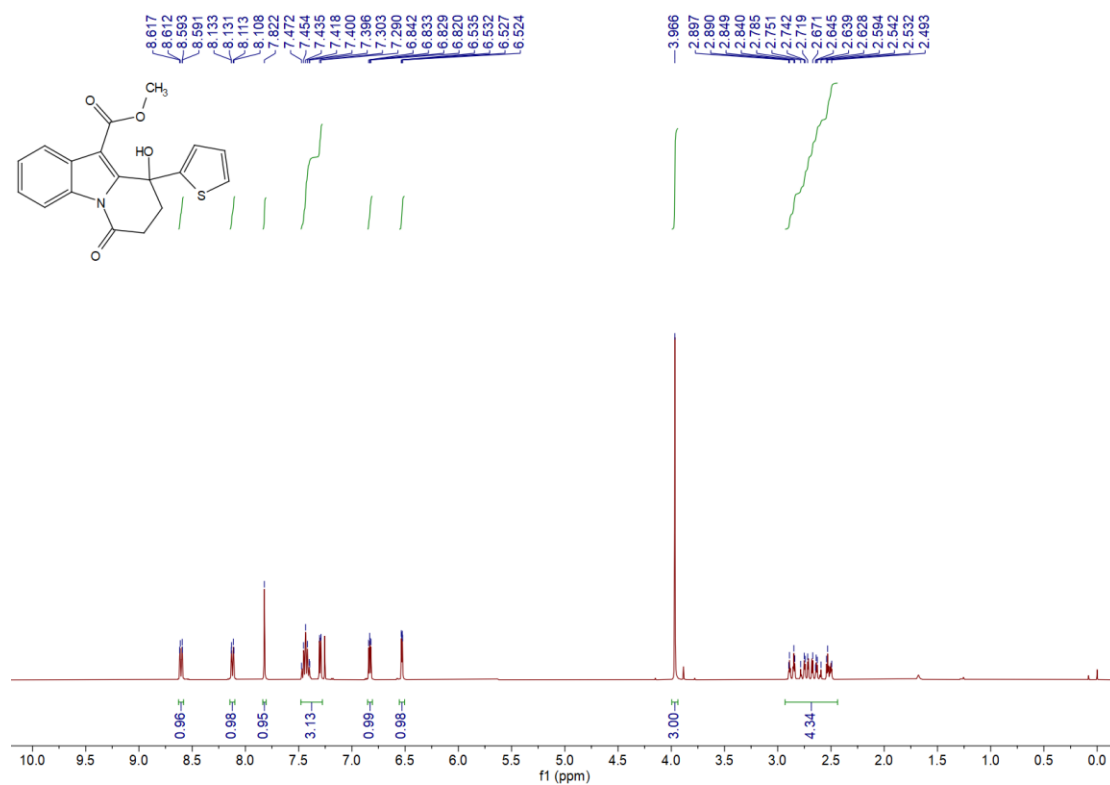

### <sup>13</sup>C NMR Spectrum of 2p

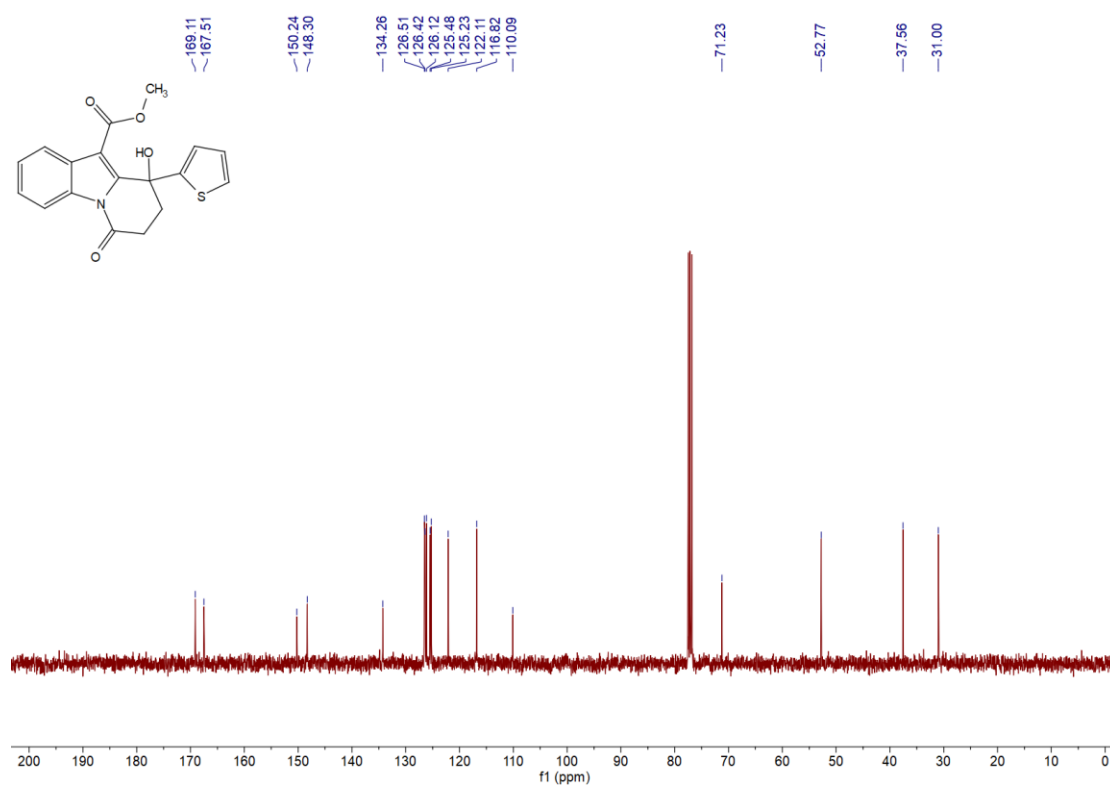

# <sup>1</sup>H NMR Spectrum of 2q

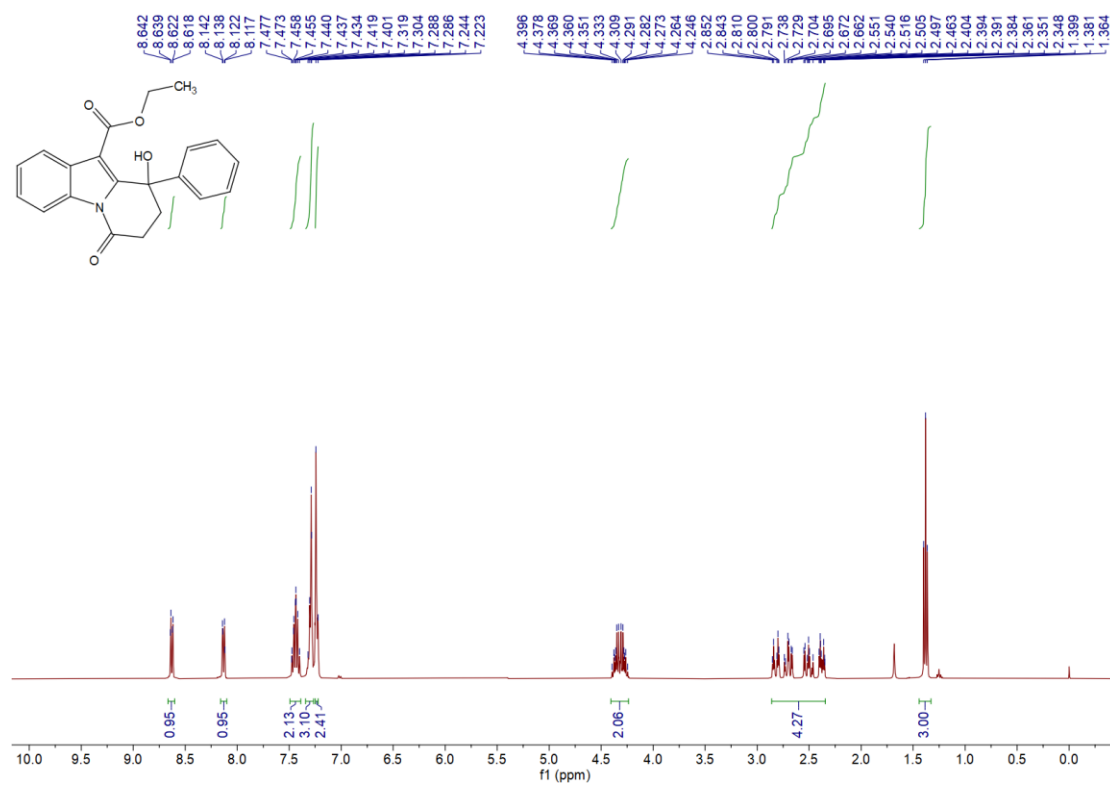

# <sup>13</sup>C NMR Spectrum of 2q

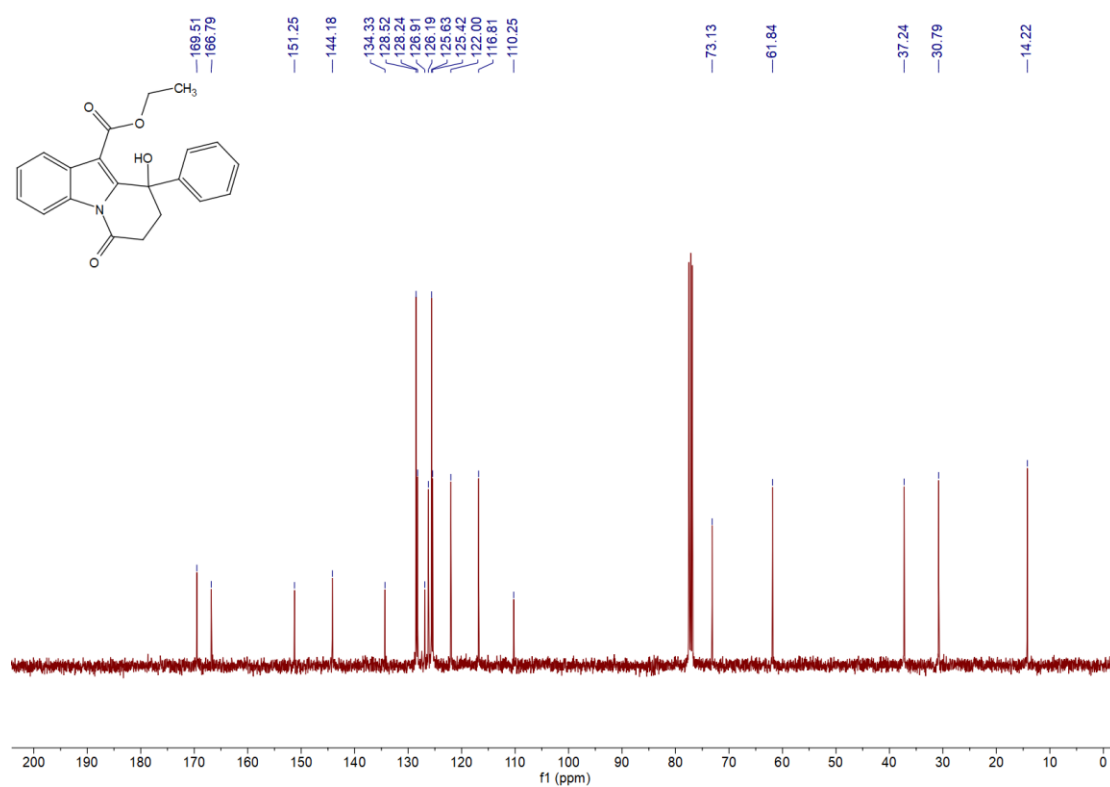

### <sup>1</sup>H NMR Spectrum of 2r

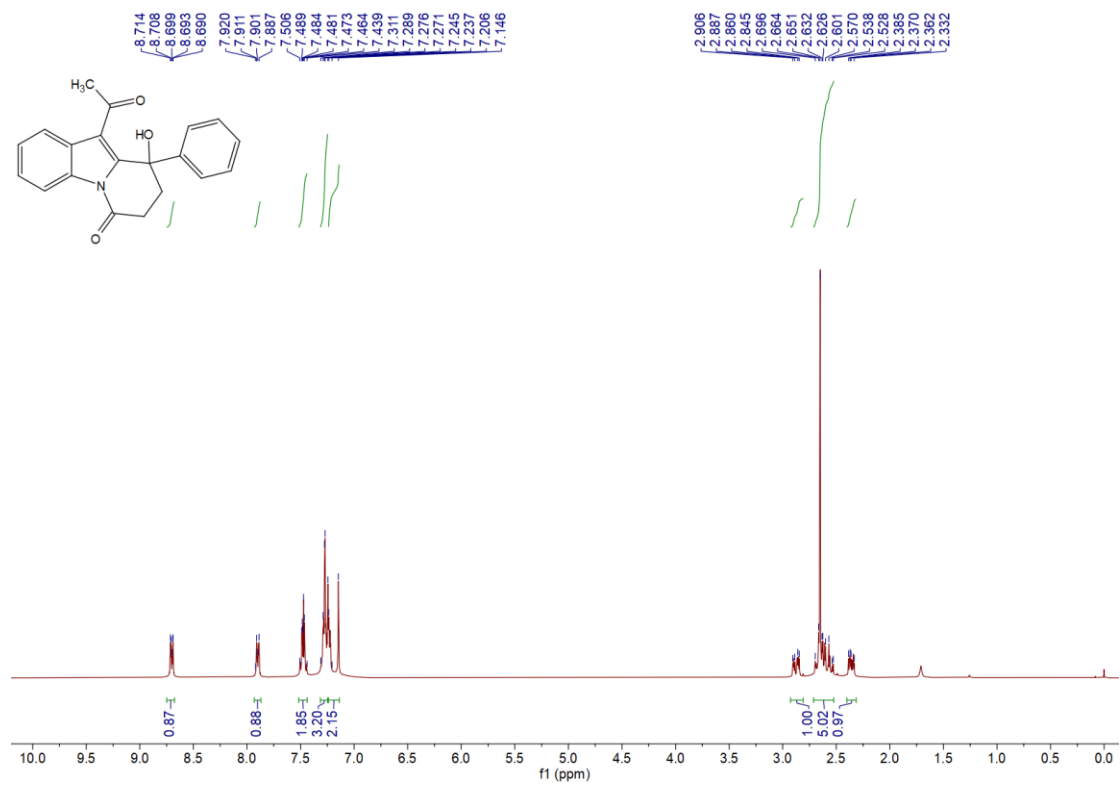

### <sup>13</sup>C NMR Spectrum of 2r

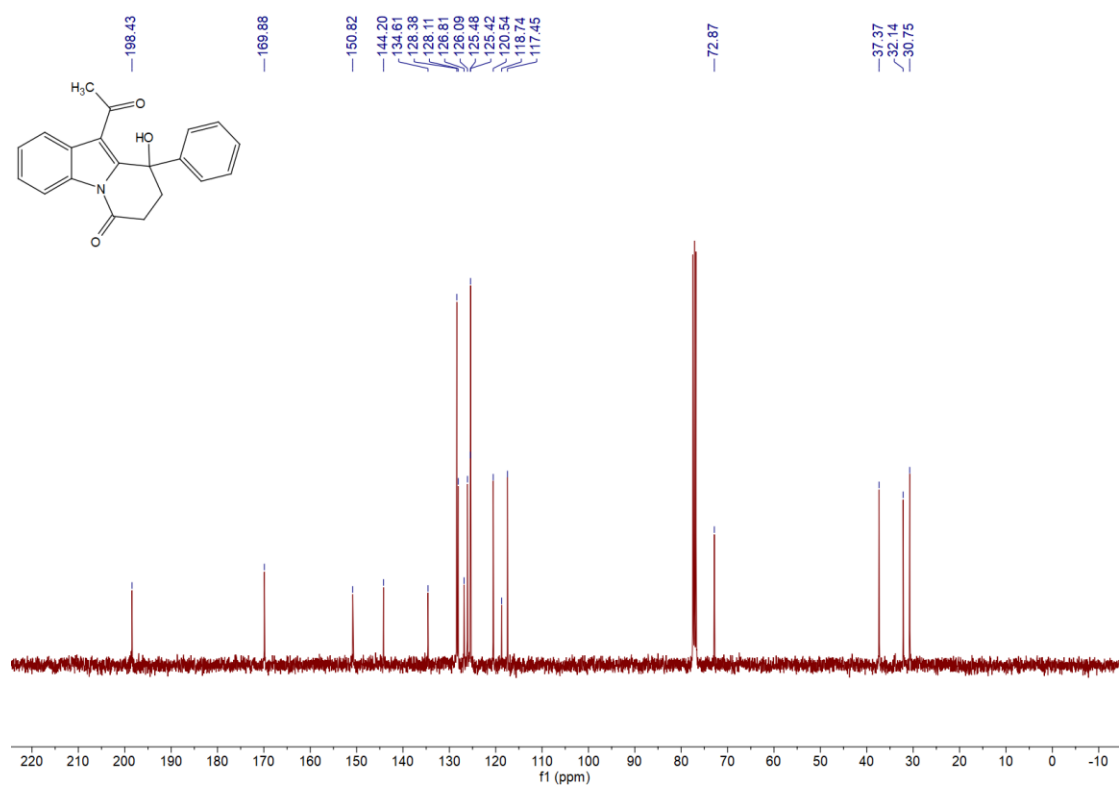

### <sup>1</sup>H NMR Spectrum of 2s

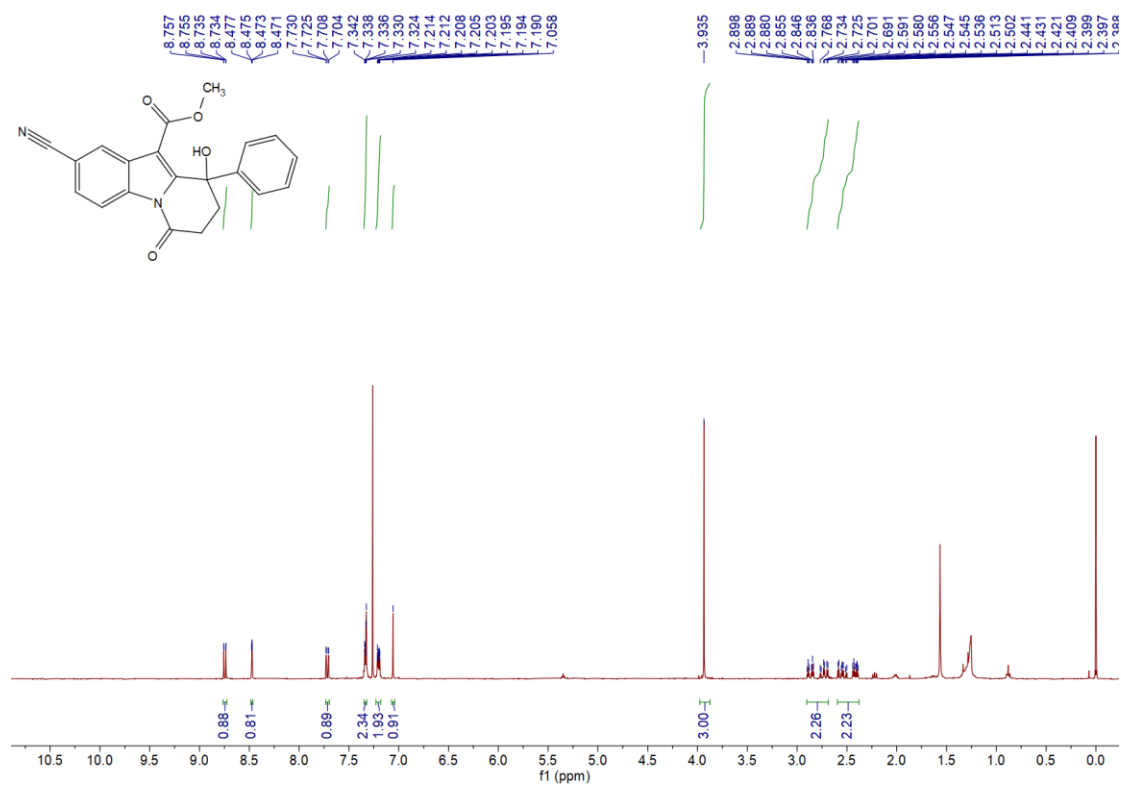

### <sup>13</sup>C NMR Spectrum of 2s

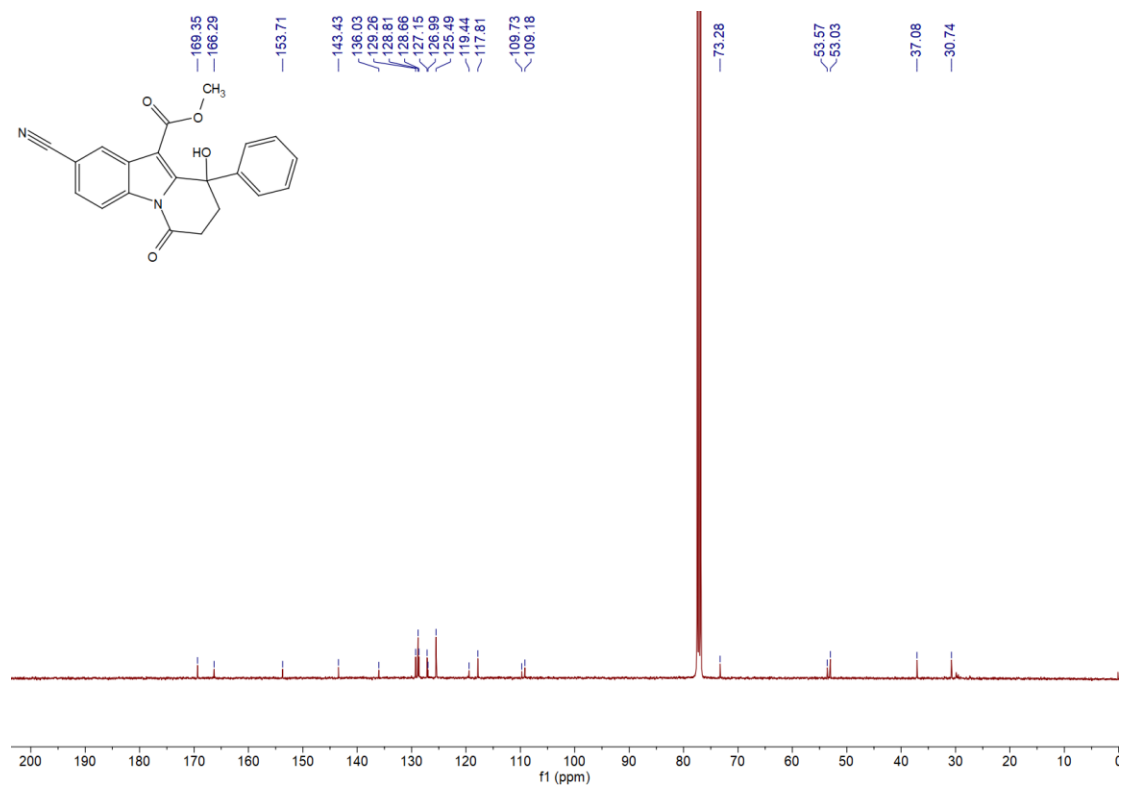



### <sup>1</sup>H NMR Spectrum of **2t**

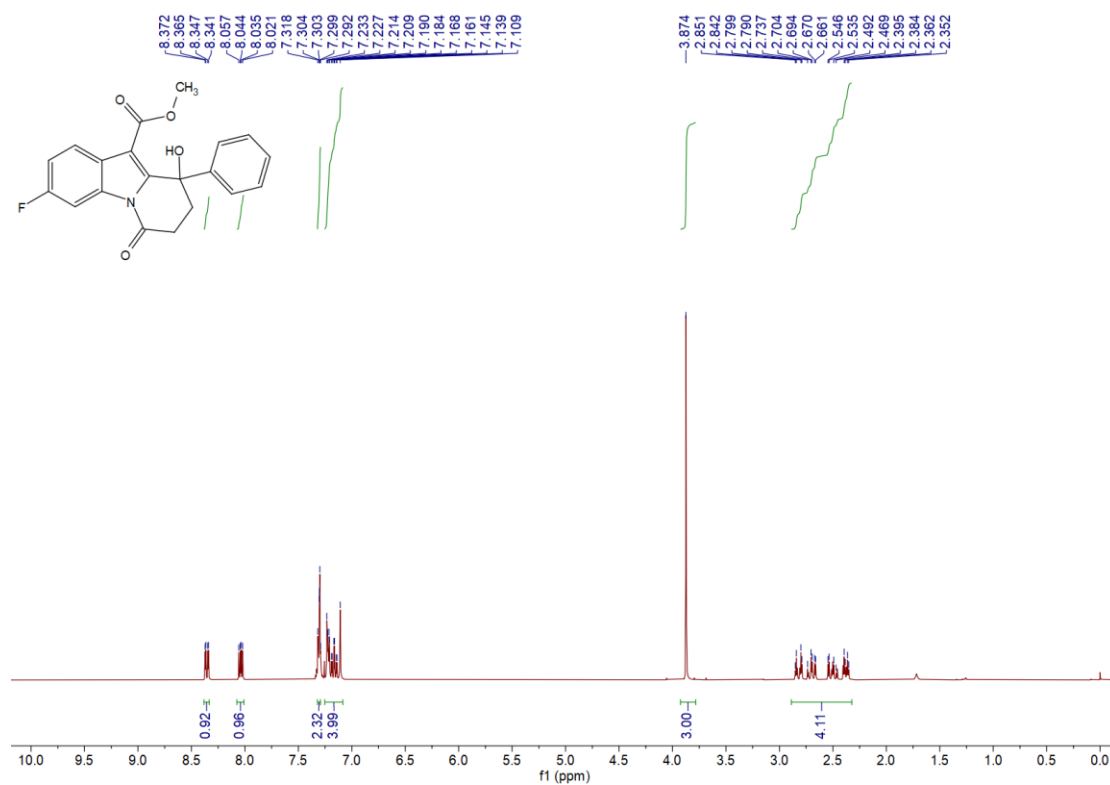

### <sup>13</sup>C NMR Spectrum of **2t**

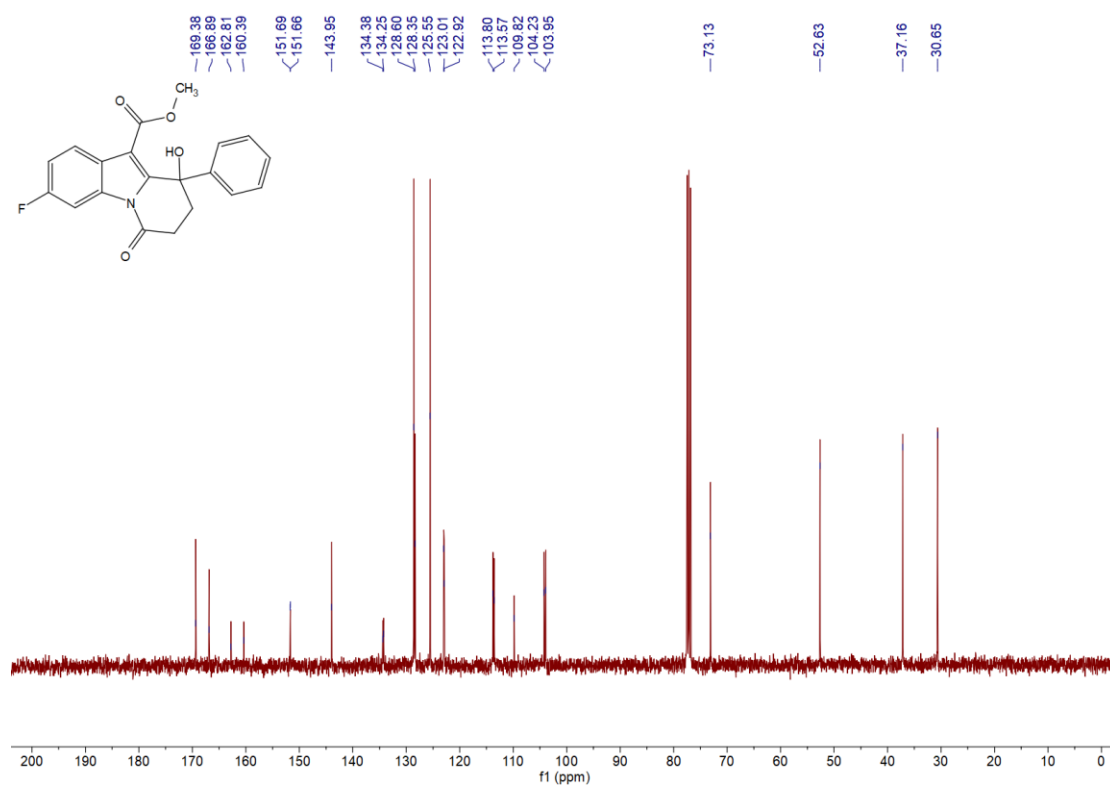

### $^{19}\text{F}$ NMR Spectrum of **2t**

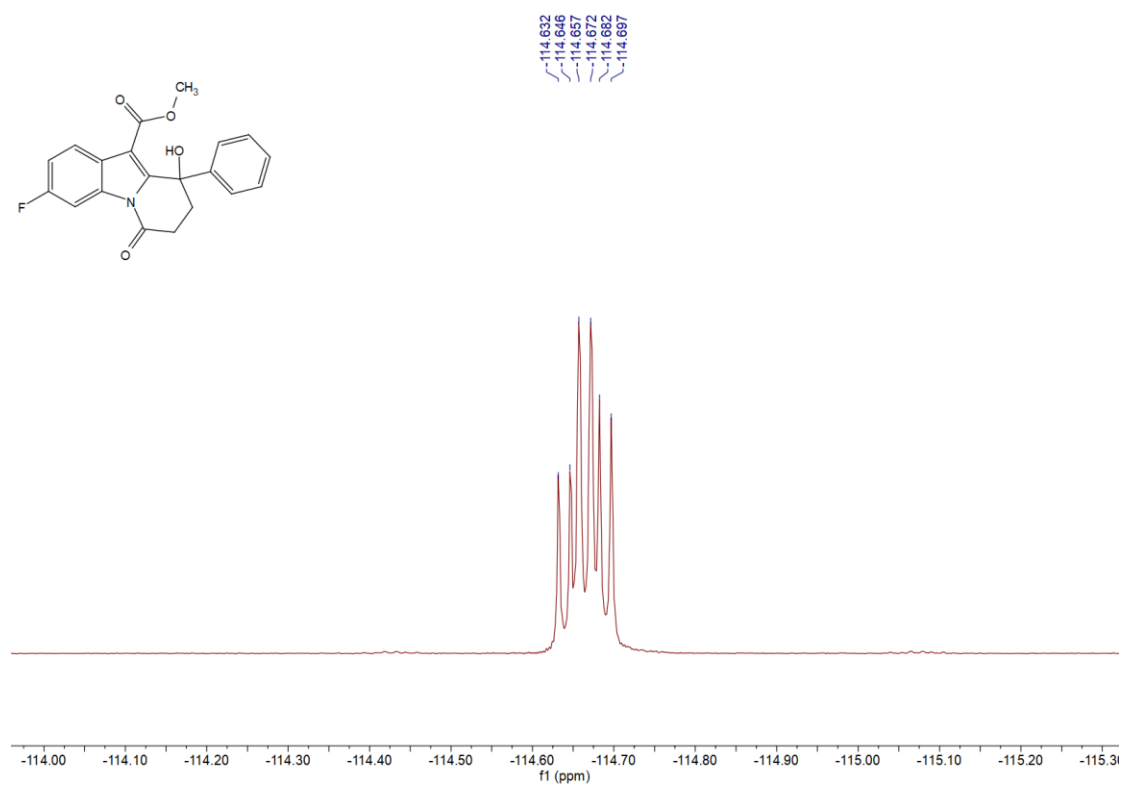

### $^1\text{H}$ NMR Spectrum of **2u**

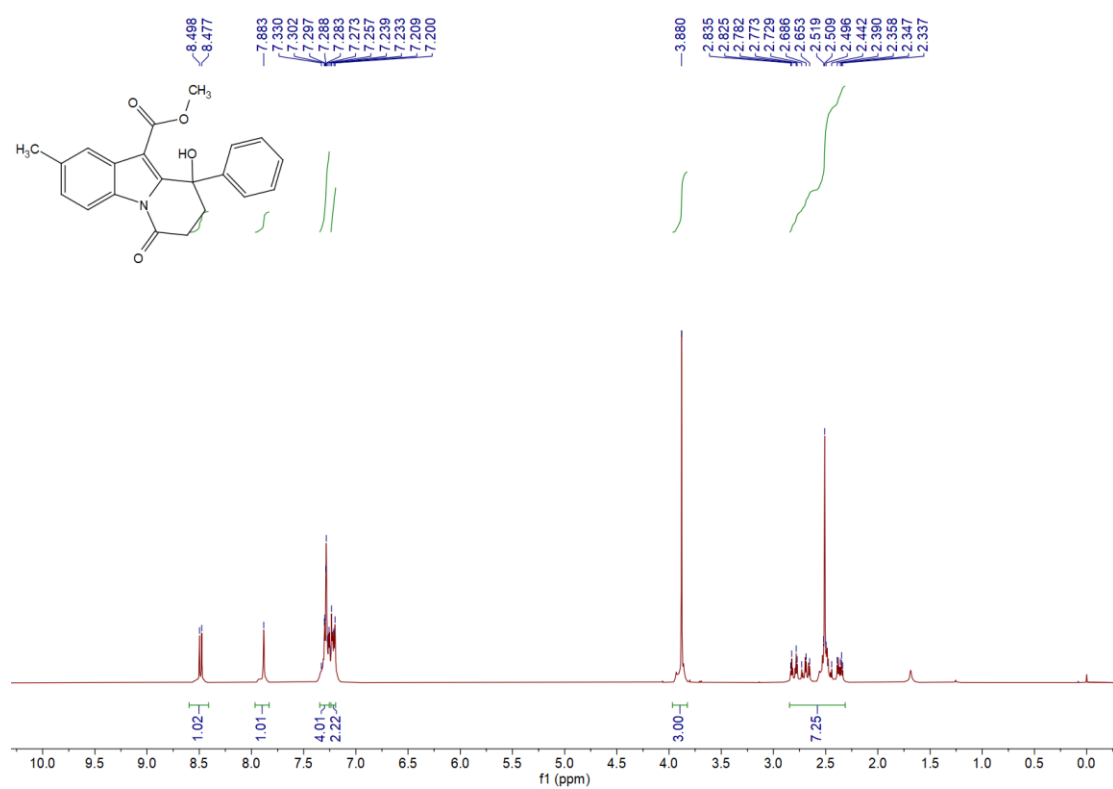

### <sup>13</sup>C NMR Spectrum of **2u**

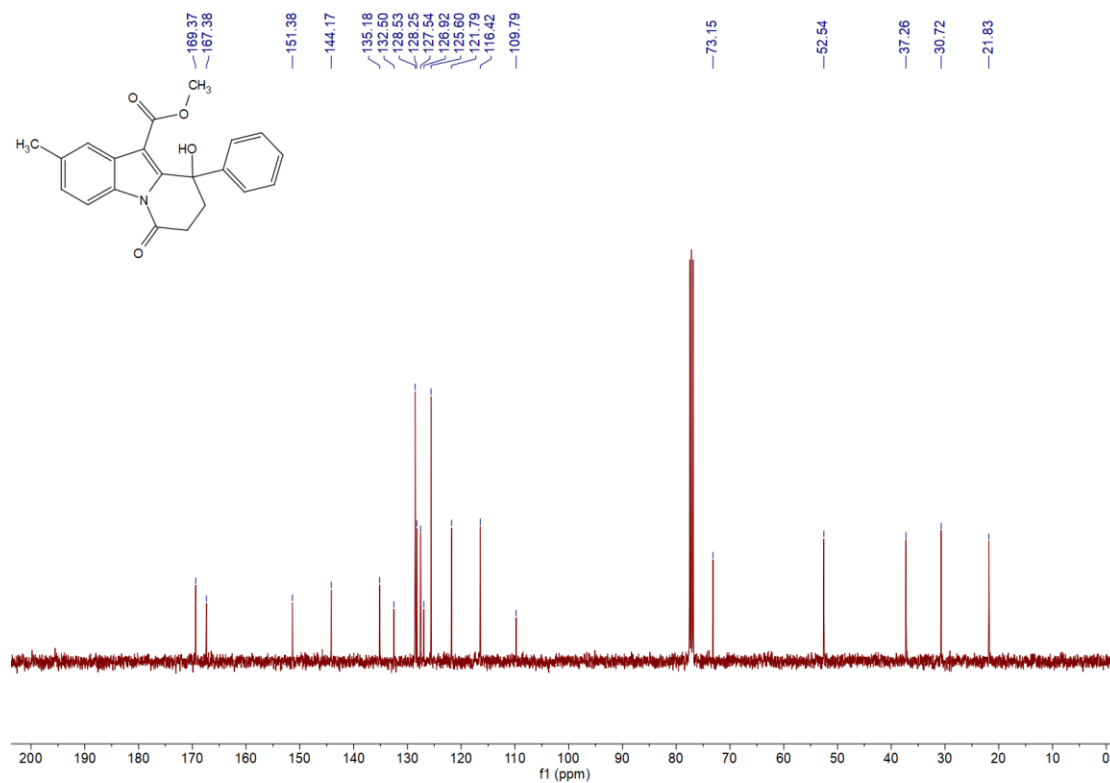

### <sup>1</sup>H NMR Spectrum of **3a**

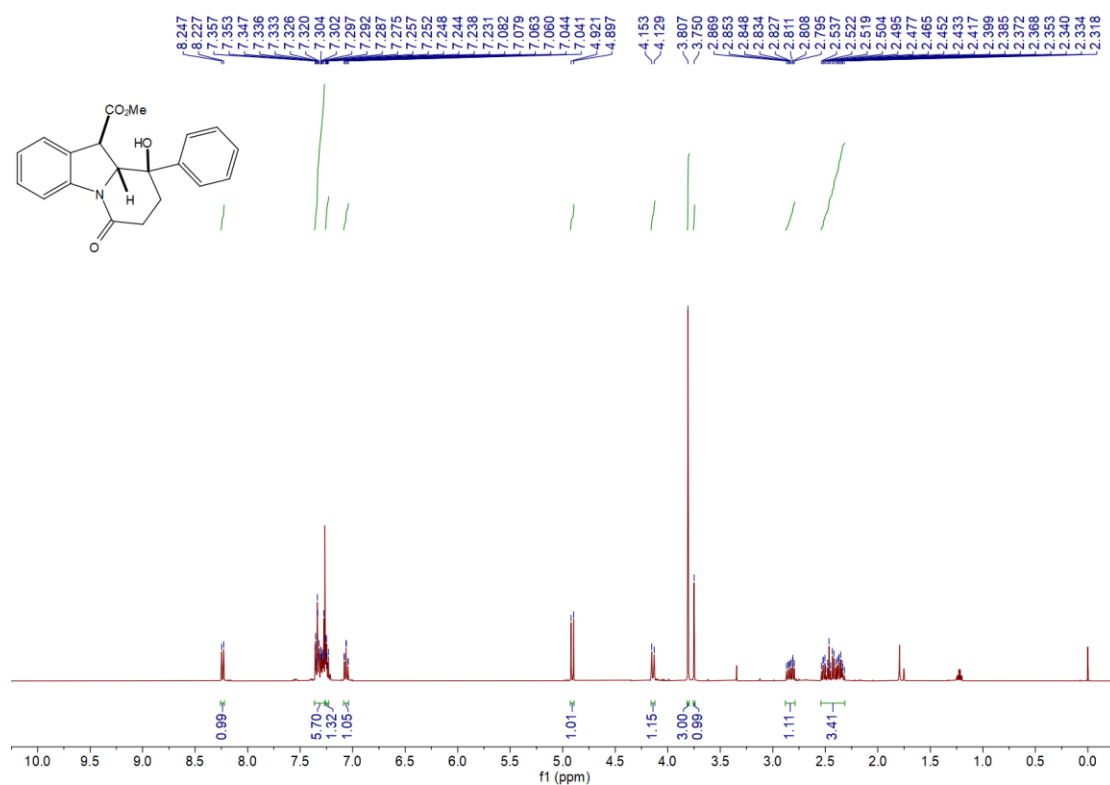

### <sup>13</sup>C NMR Spectrum of **3a**

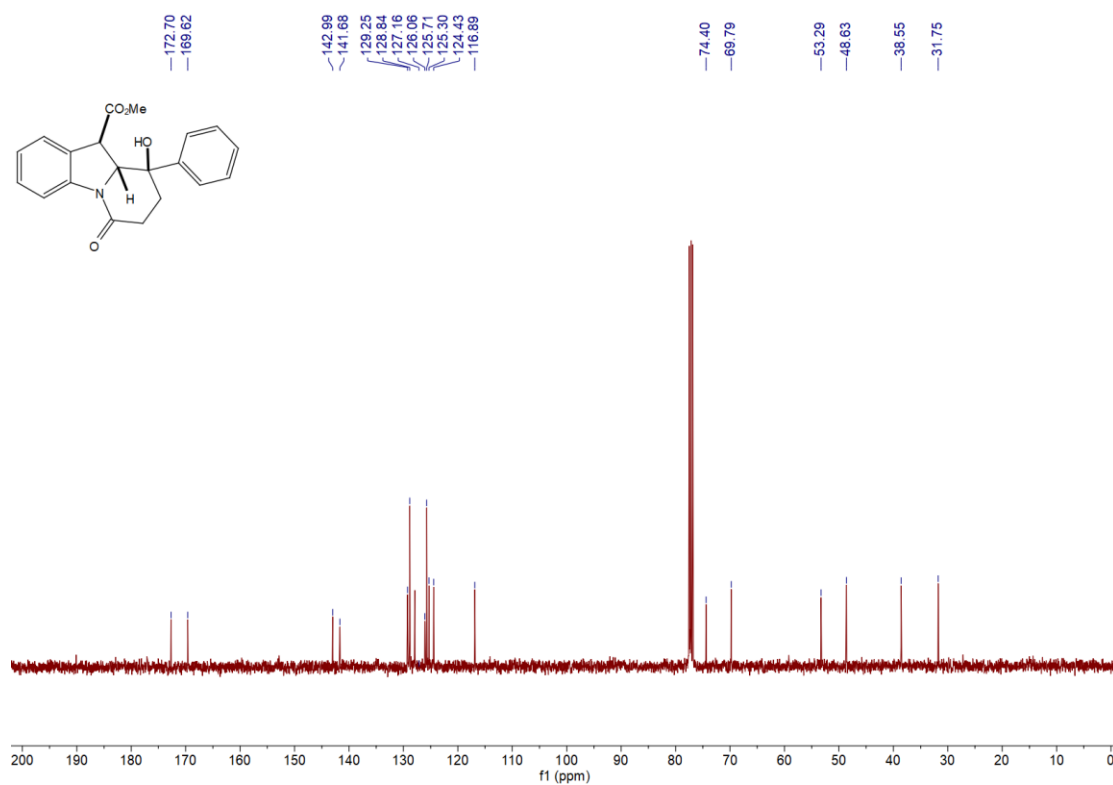

### <sup>1</sup>H NMR Spectrum of **3b**

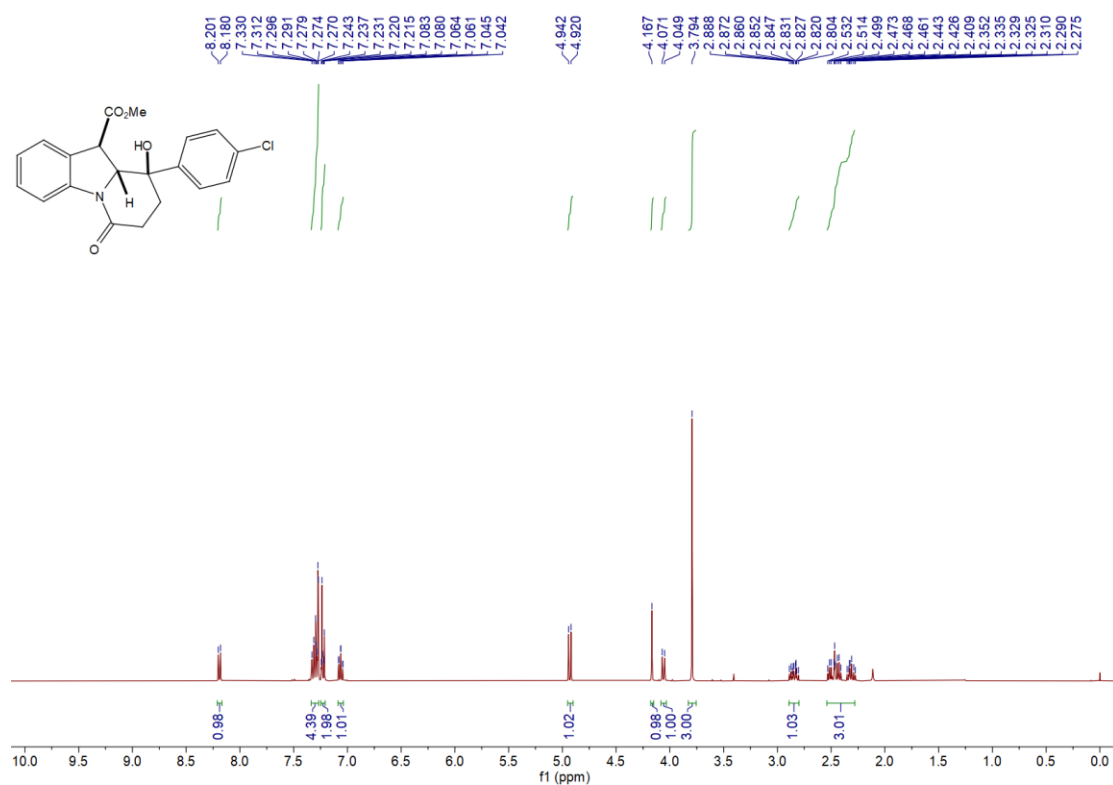

### <sup>13</sup>C NMR Spectrum of **3b**

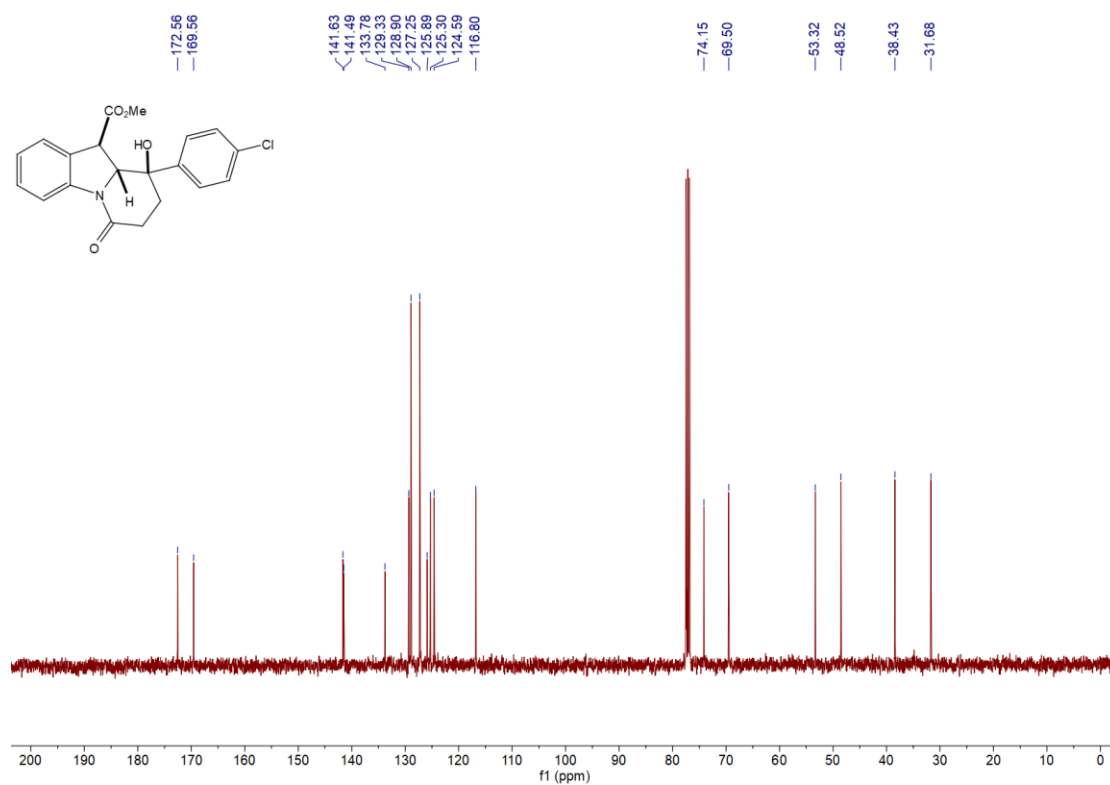

### <sup>1</sup>H NMR Spectrum of **3c**

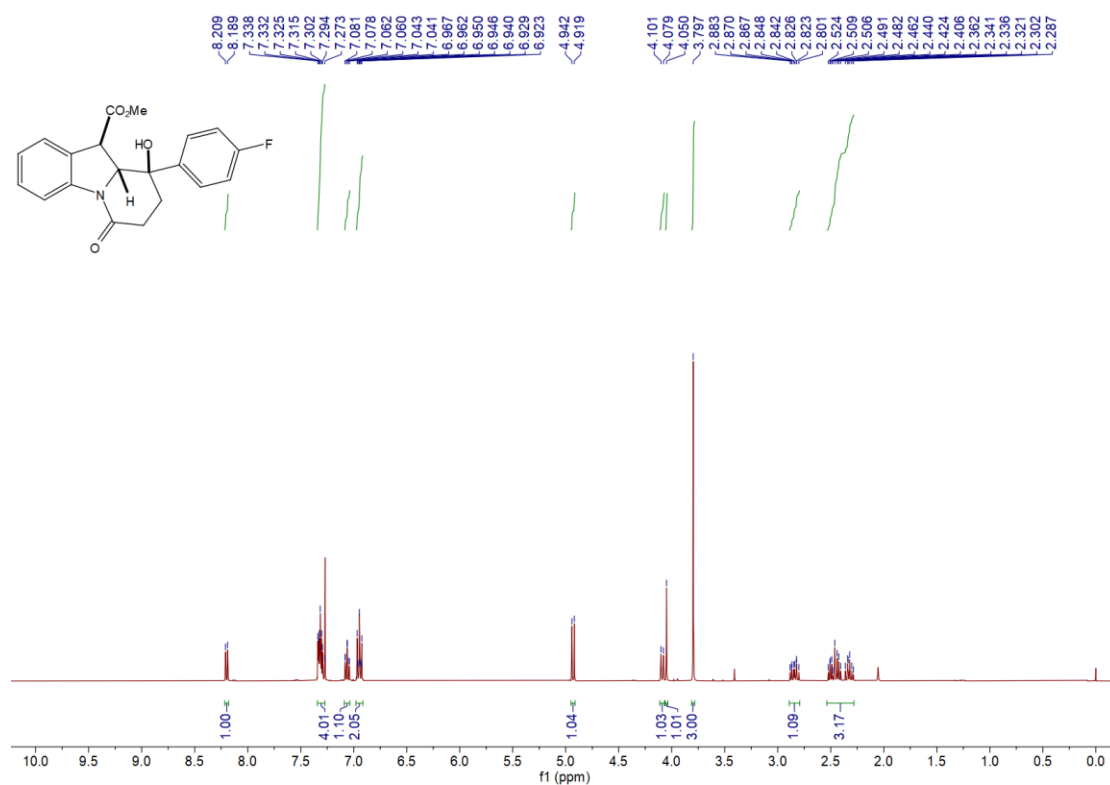

### <sup>13</sup>C NMR Spectrum of **3c**

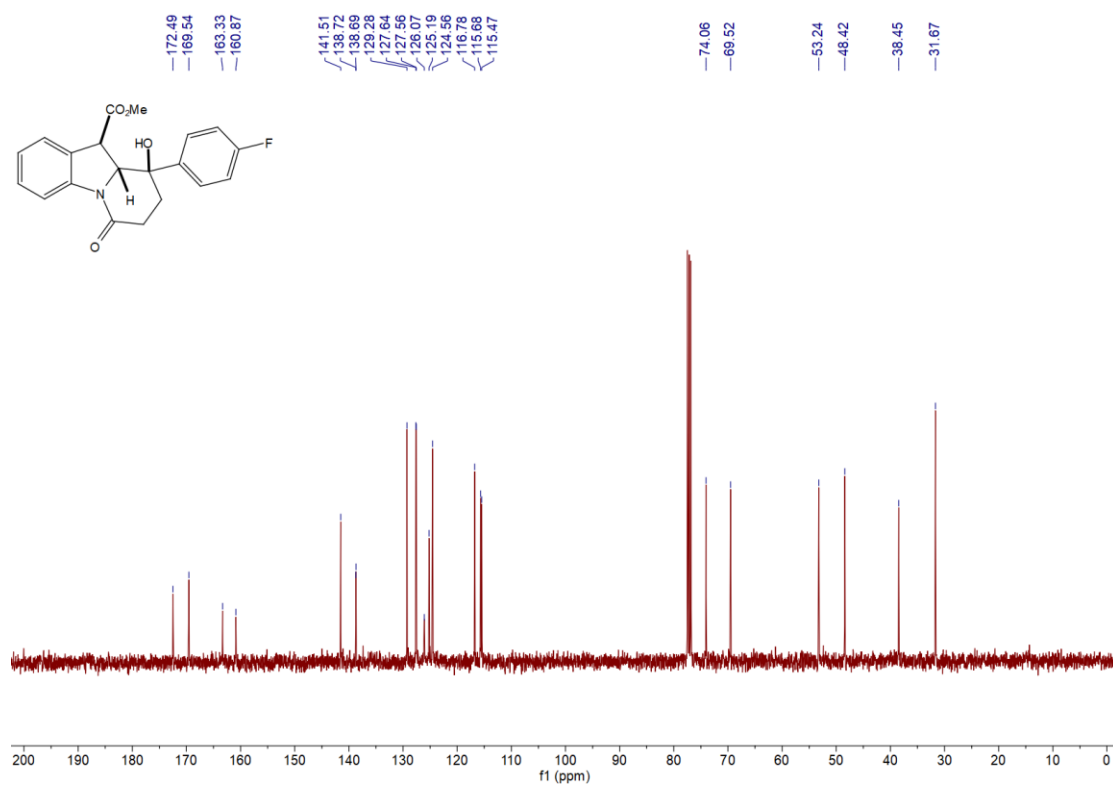

### <sup>19</sup>F NMR Spectrum of **3c**

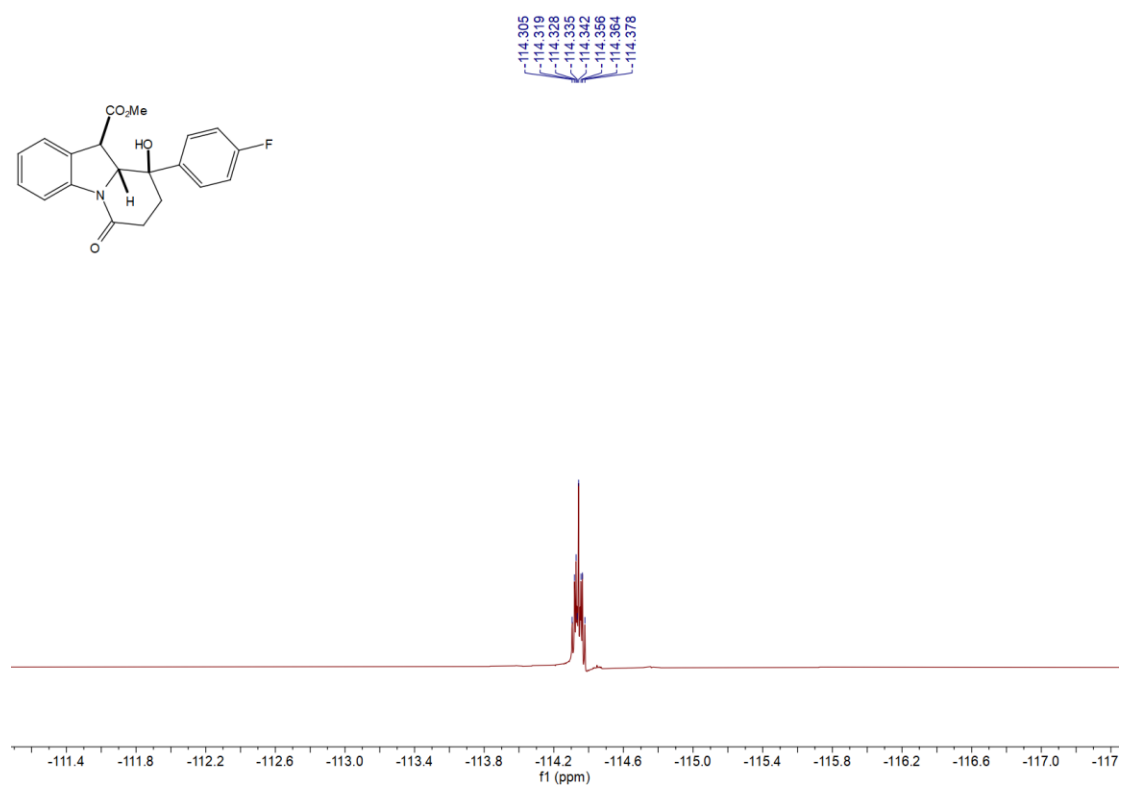

### <sup>1</sup>H NMR Spectrum of **3d**

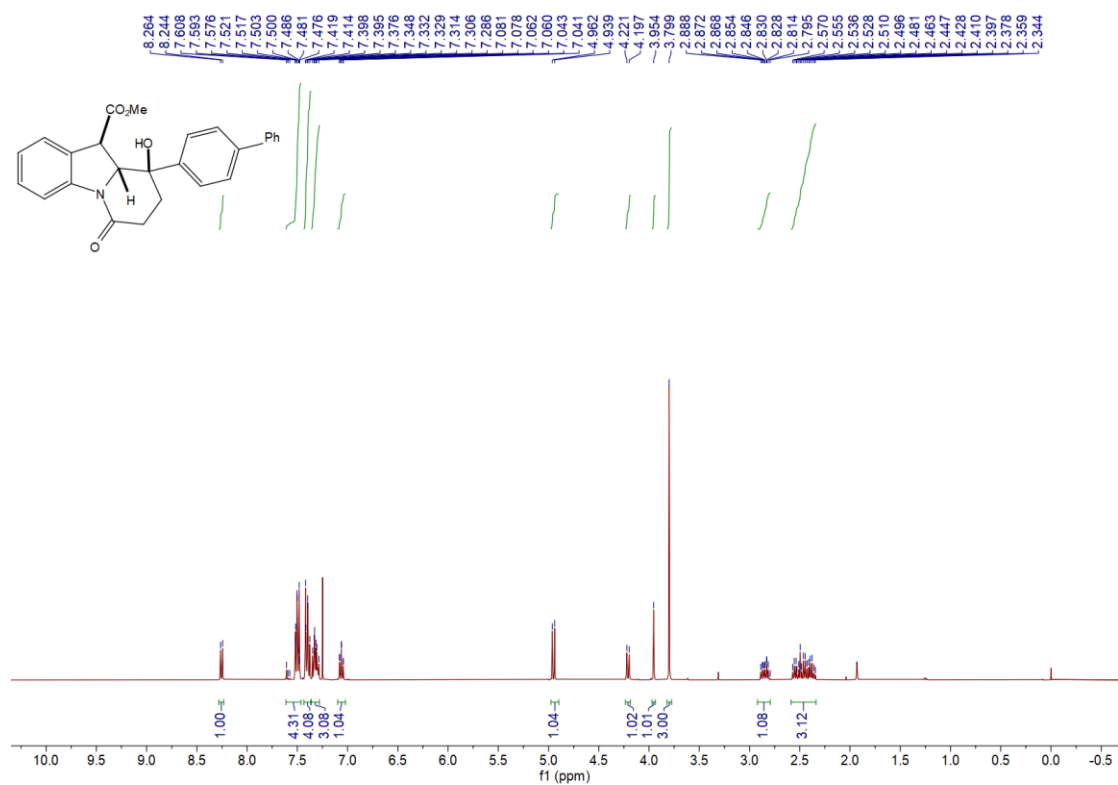

### <sup>13</sup>C NMR Spectrum of **3d**

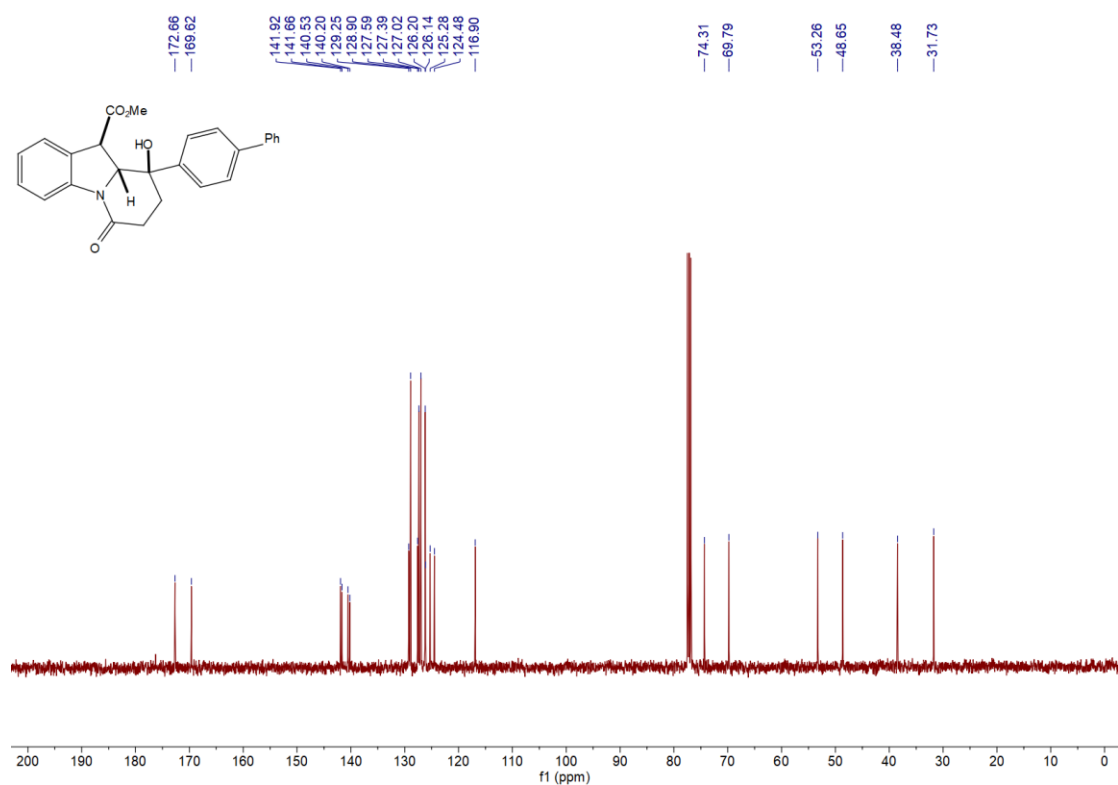

### <sup>1</sup>H NMR Spectrum of **3e**

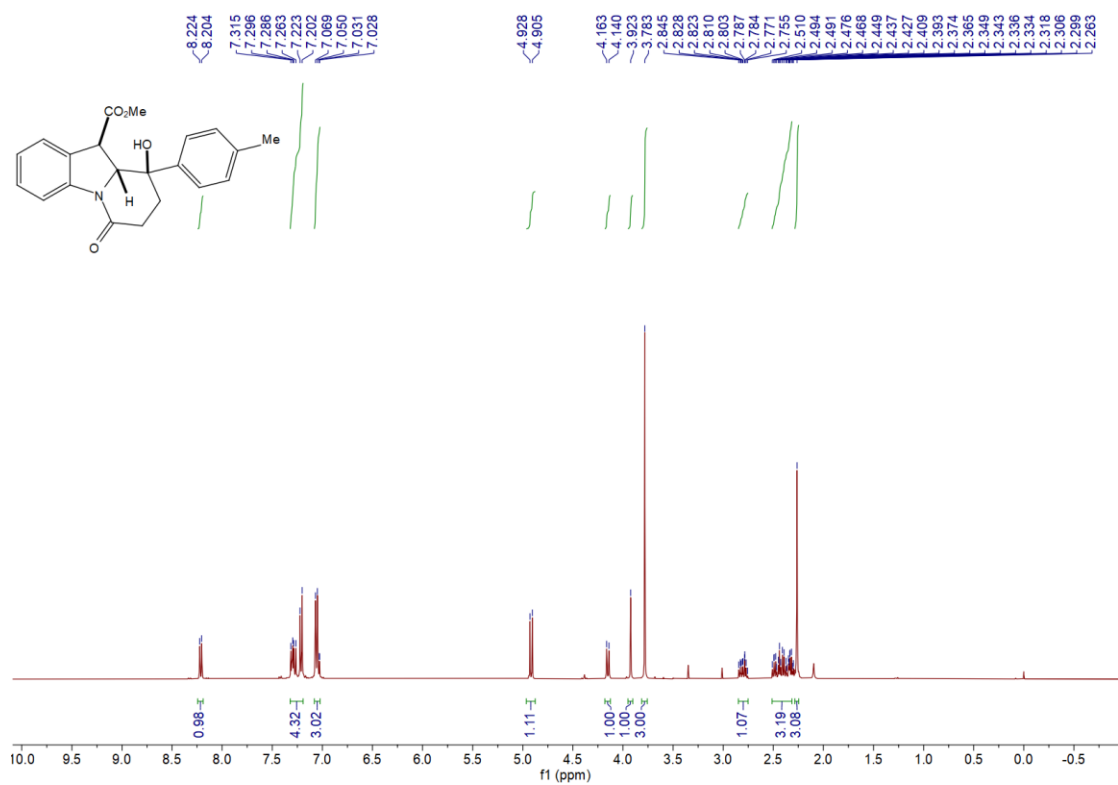

### <sup>13</sup>C NMR Spectrum of **3e**

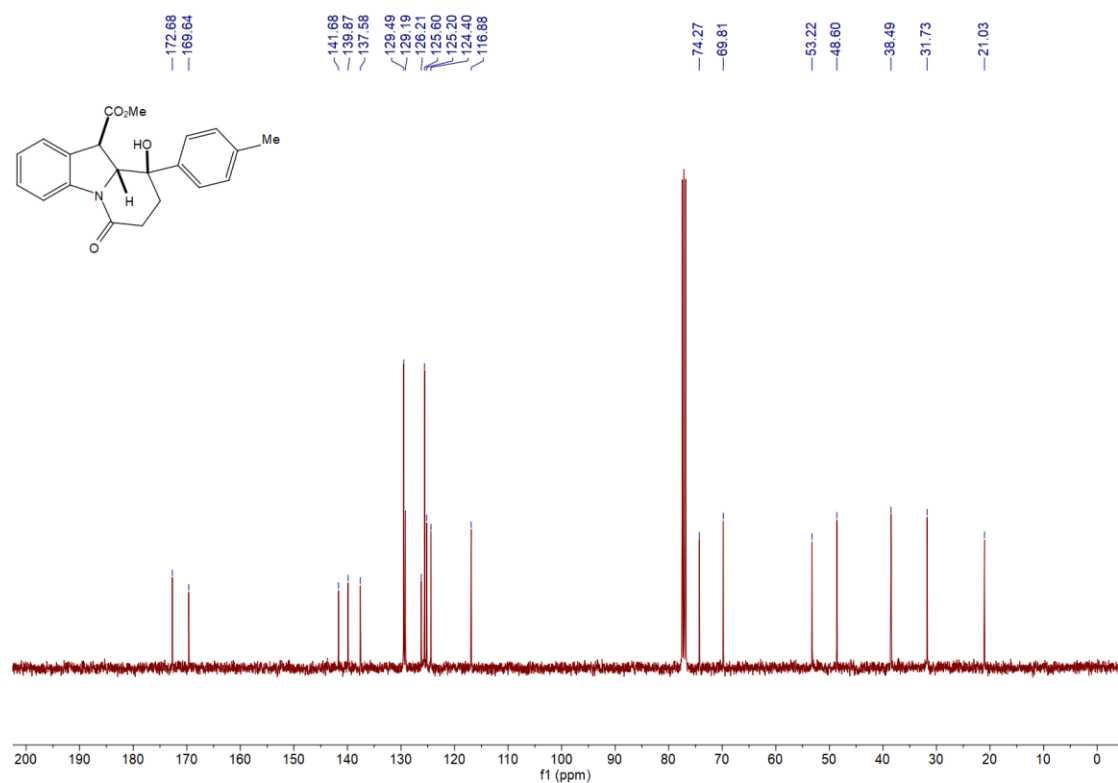



### <sup>1</sup>H NMR Spectrum of **3f**

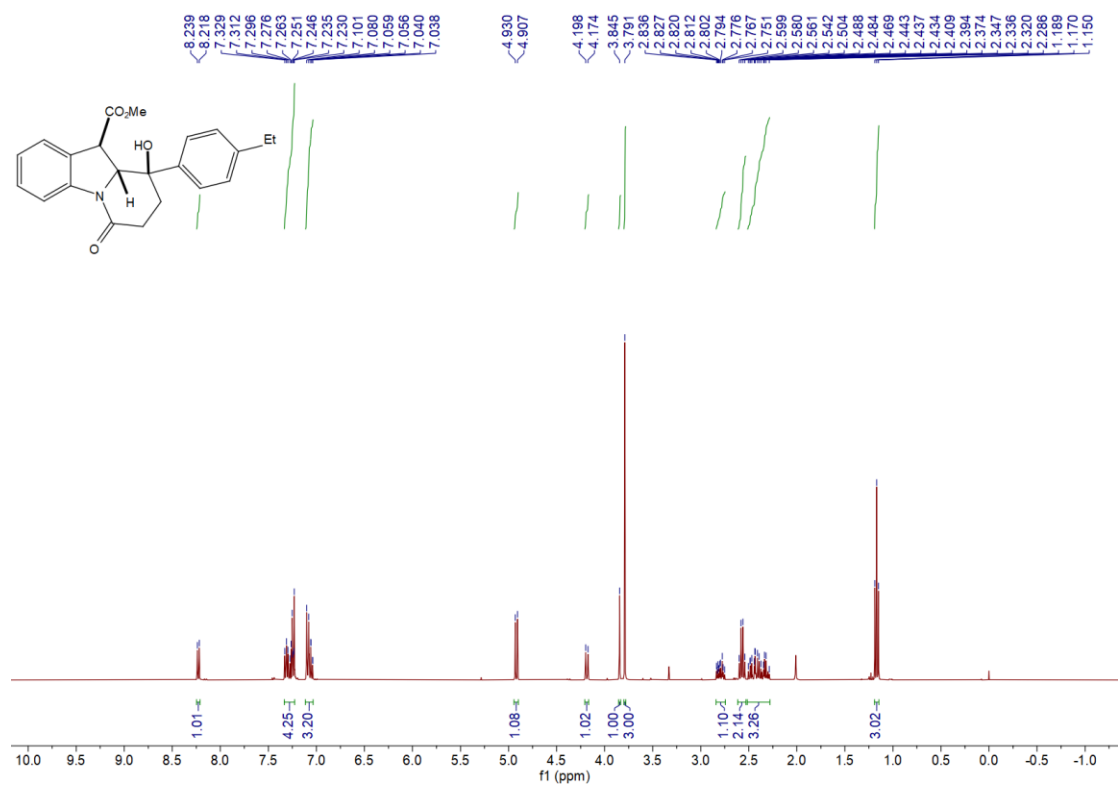

### <sup>13</sup>C NMR Spectrum of **3f**

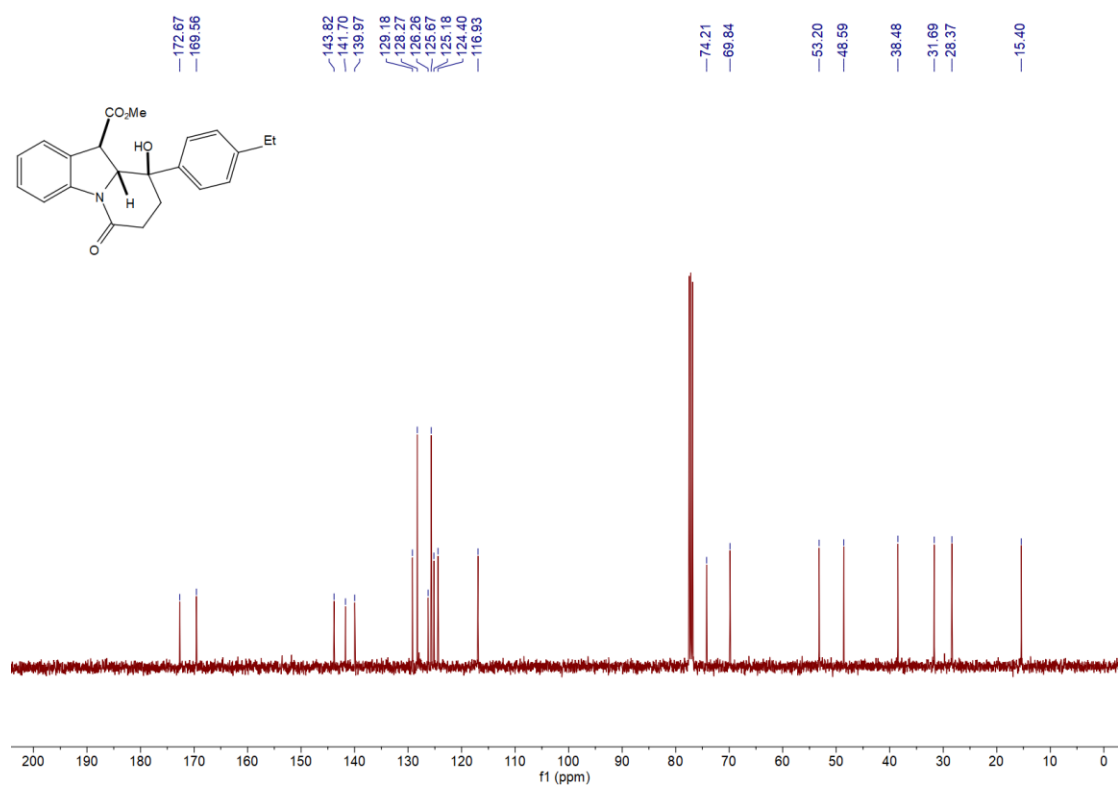

# <sup>1</sup>H NMR Spectrum of **3g**

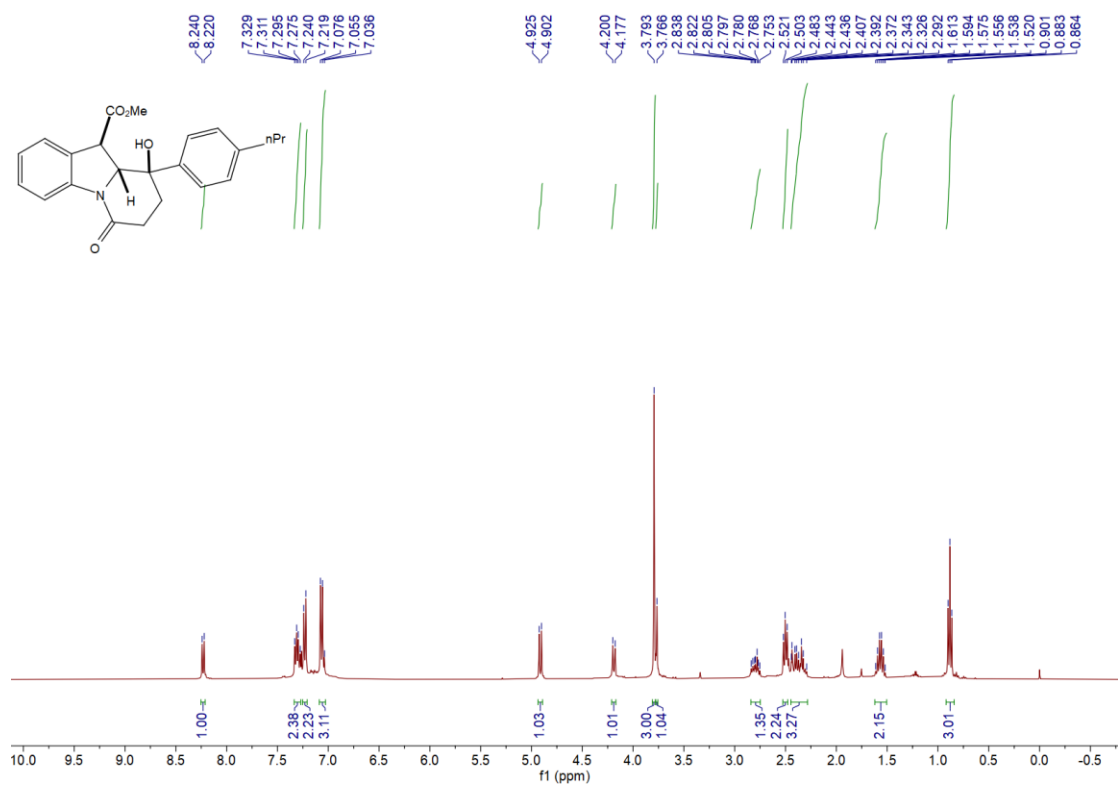

# <sup>13</sup>C NMR Spectrum of **3g**

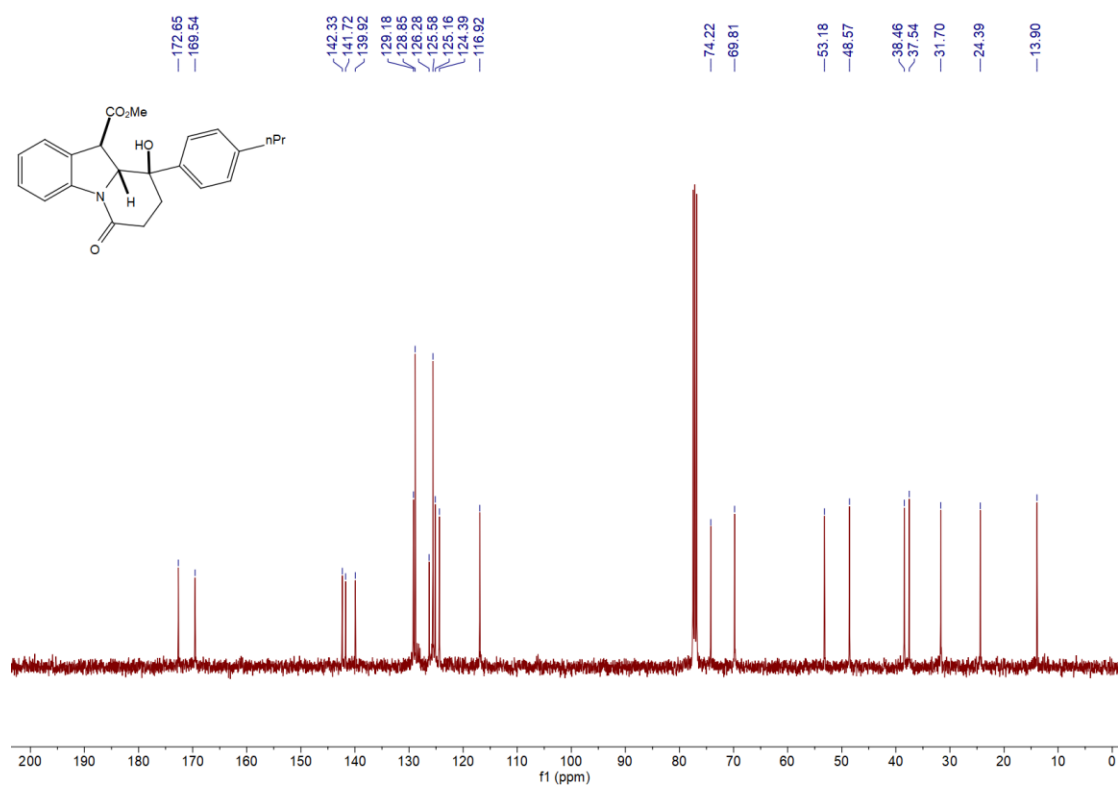

### <sup>1</sup>H NMR Spectrum of **3h**

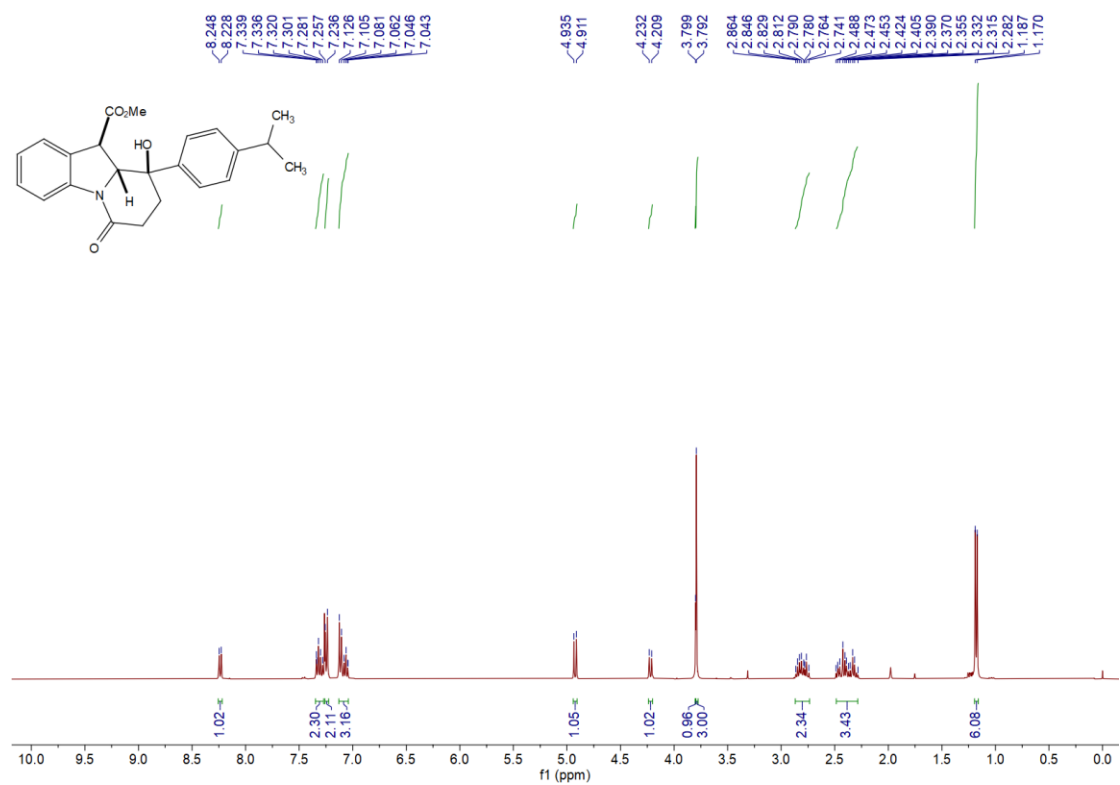

### <sup>13</sup>C NMR Spectrum of **3h**

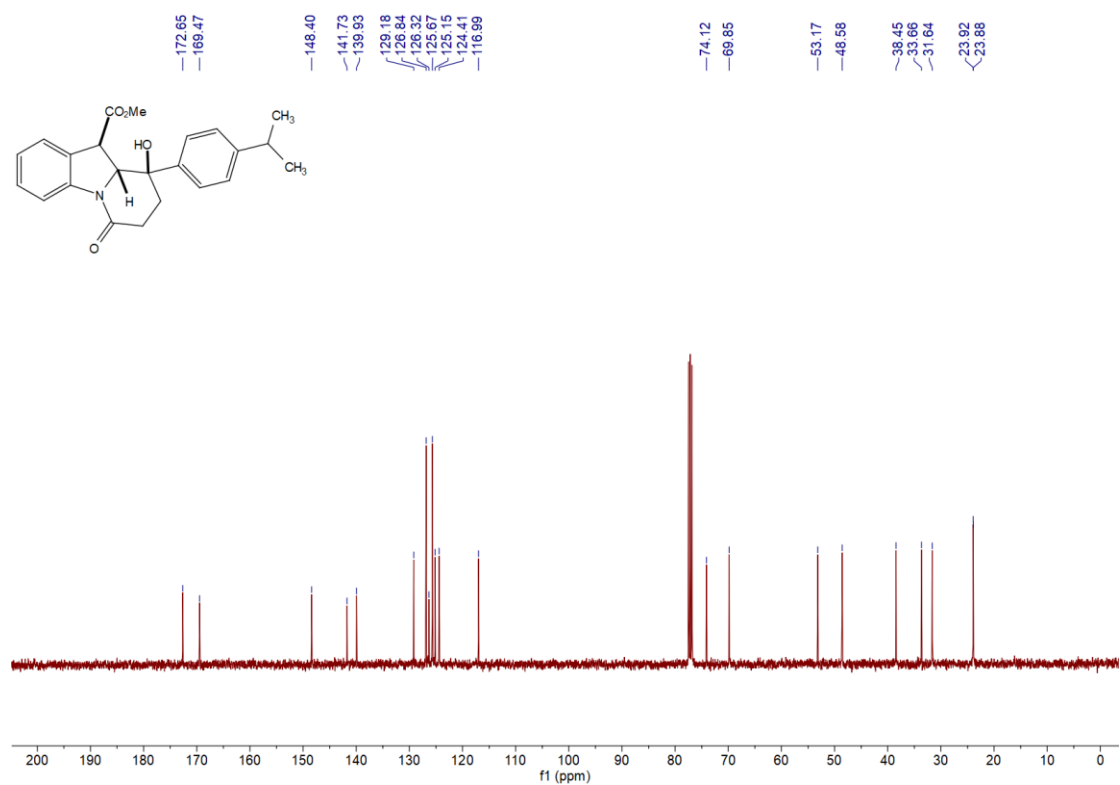

### <sup>1</sup>H NMR Spectrum of **3i**

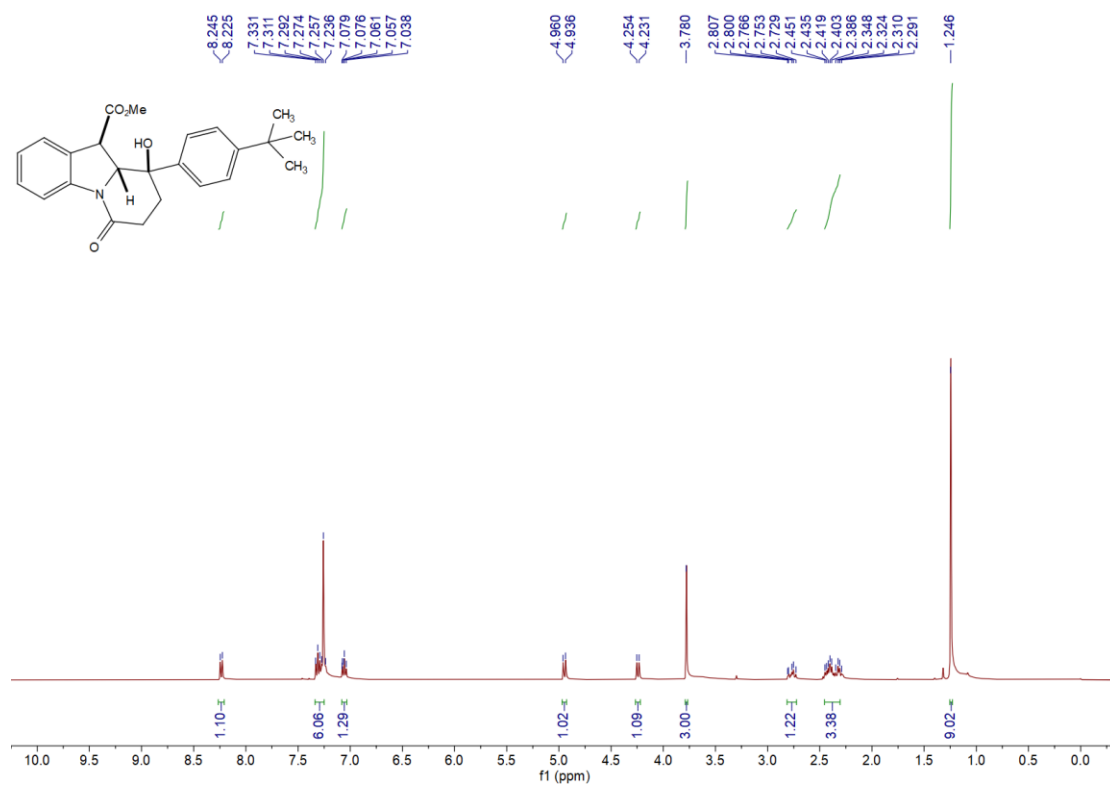

### <sup>13</sup>C NMR Spectrum of **3i**

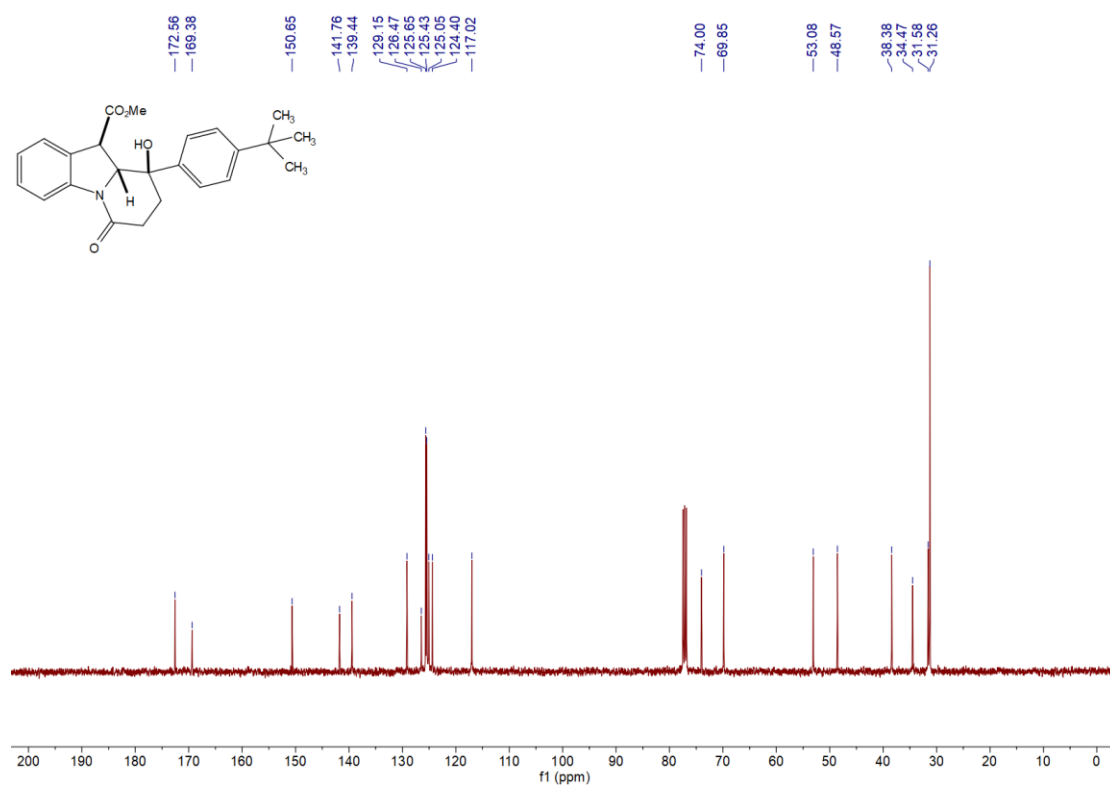

### <sup>1</sup>H NMR Spectrum of **3j**

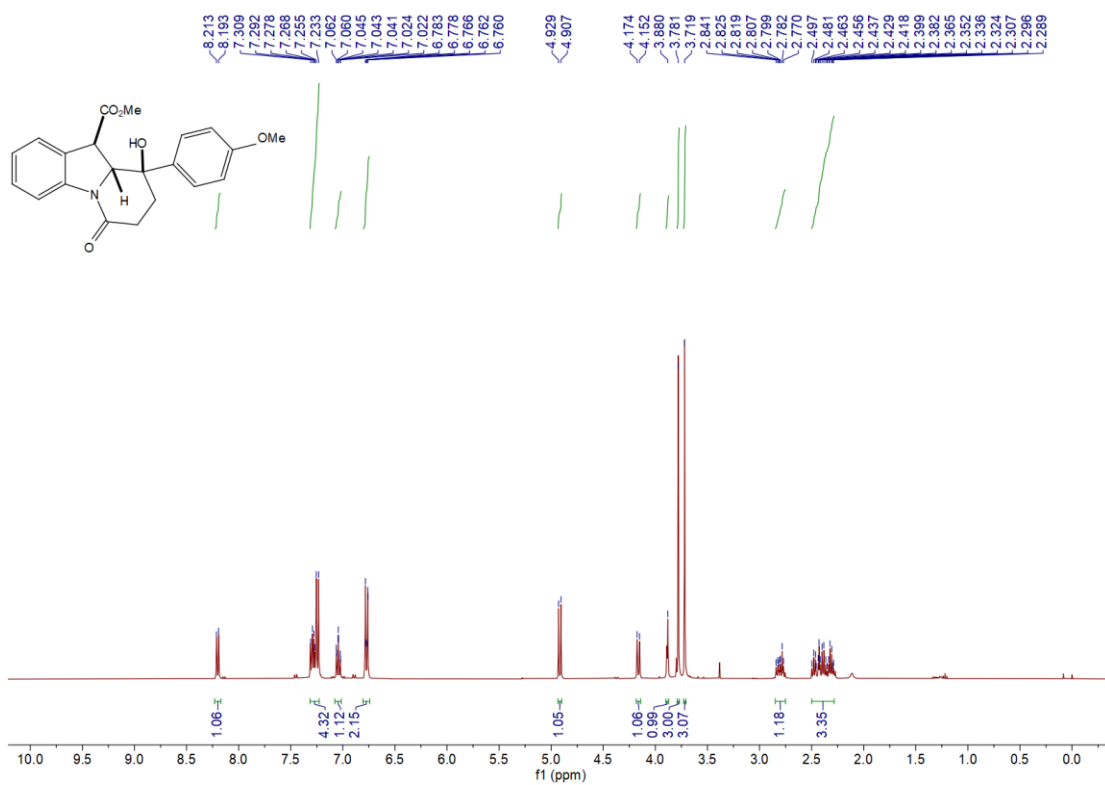

### <sup>13</sup>C NMR Spectrum of **3j**

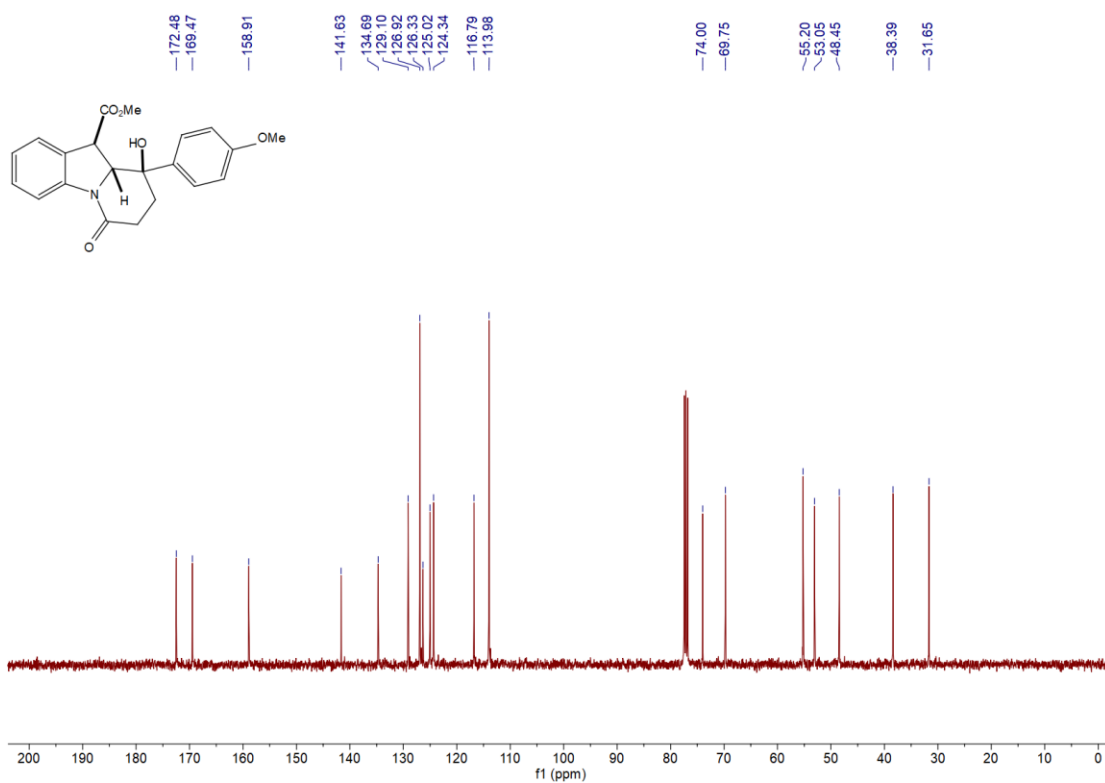

# <sup>1</sup>H NMR Spectrum of **3k**

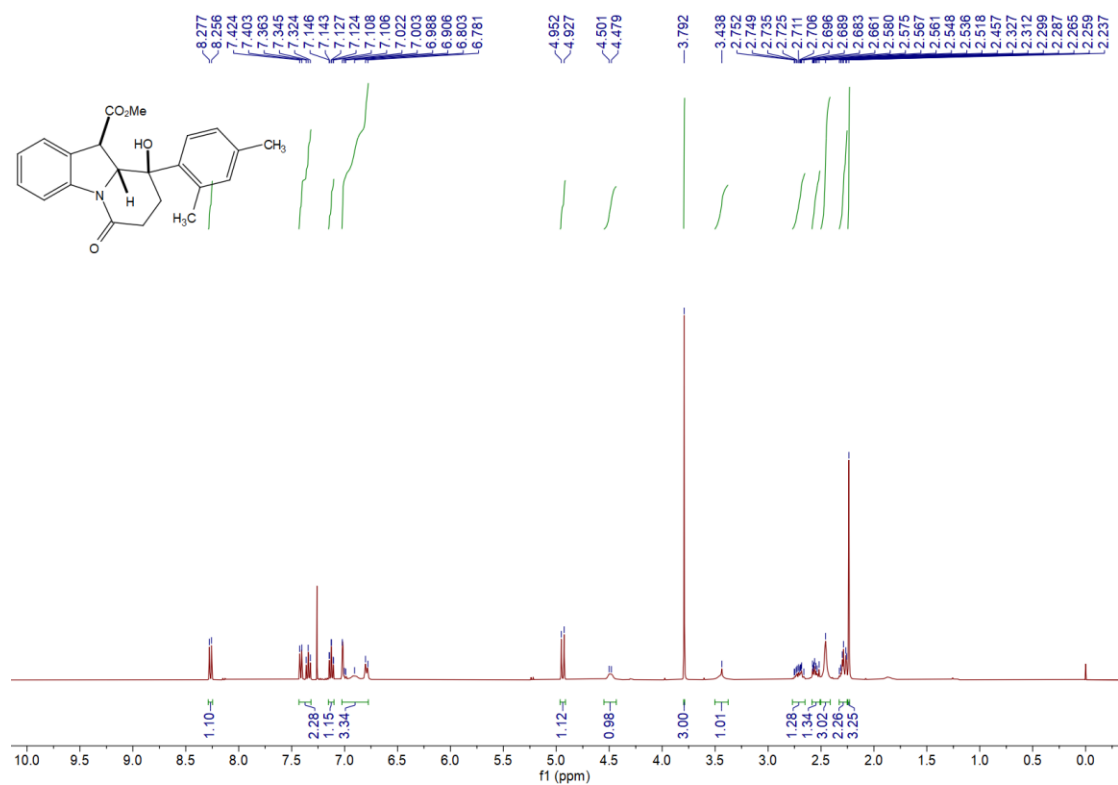

# <sup>13</sup>C NMR Spectrum of **3k**

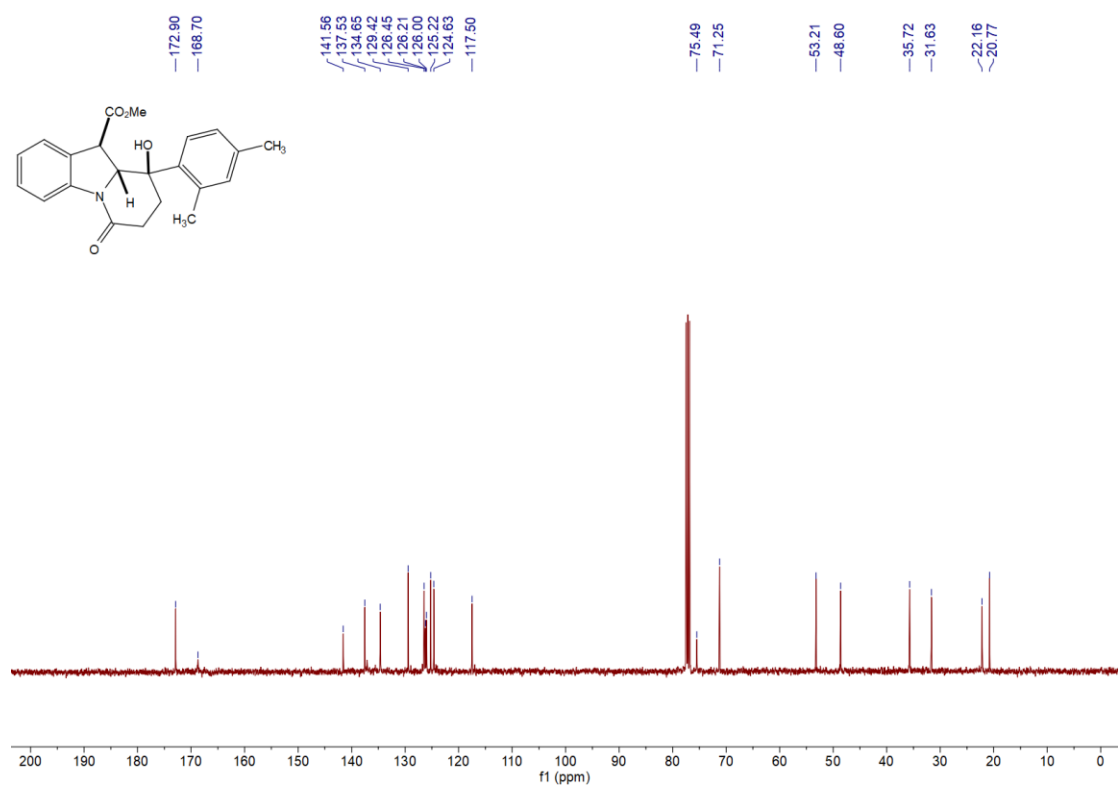

# <sup>1</sup>H NMR Spectrum of **31**

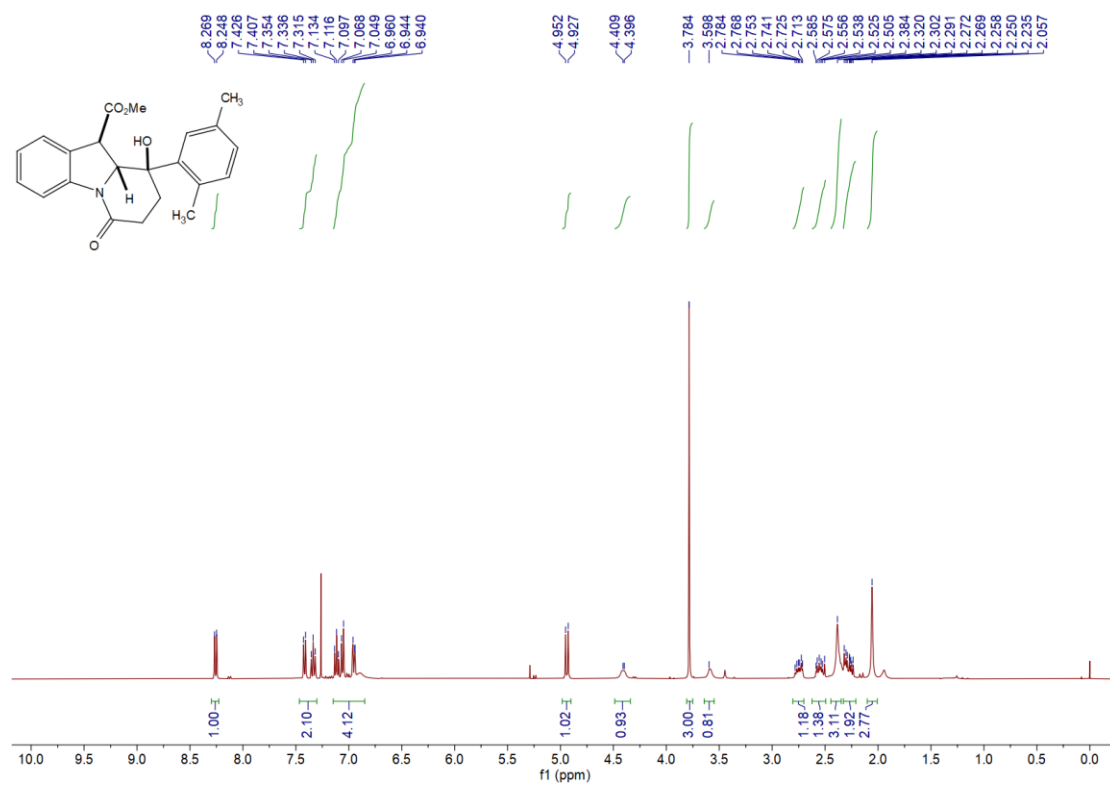

# <sup>13</sup>C NMR Spectrum of **31**

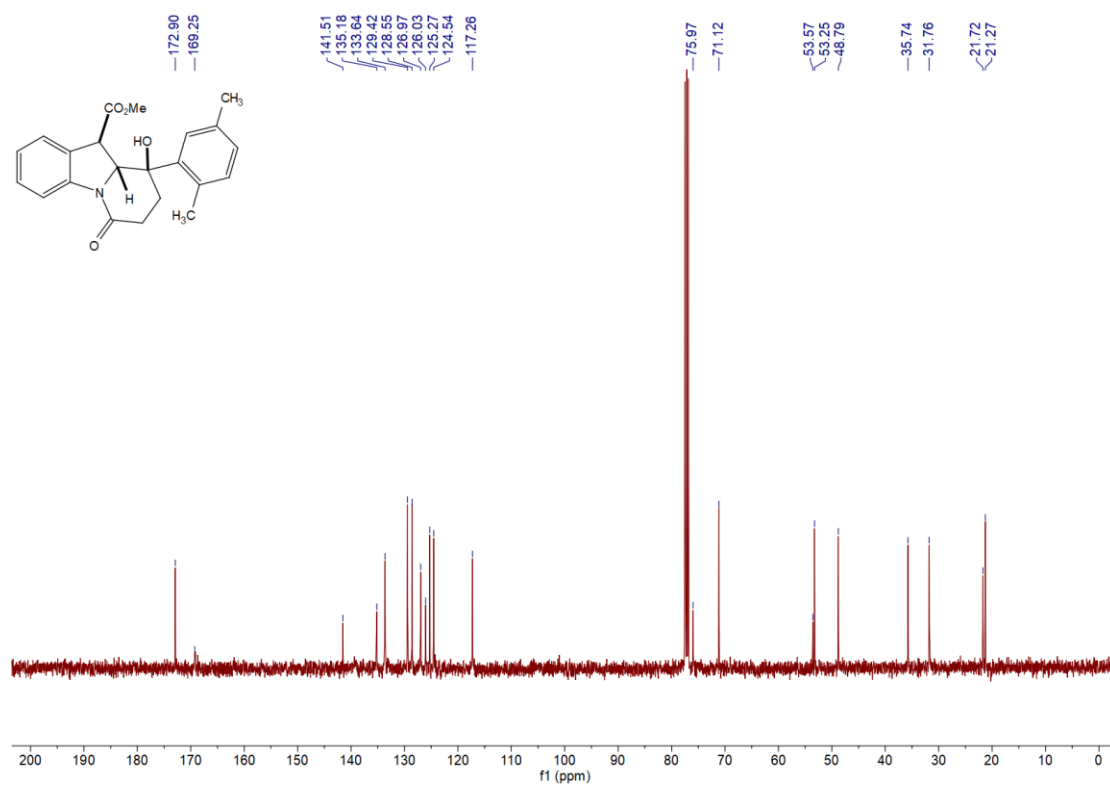

### <sup>1</sup>H NMR Spectrum of **3m**

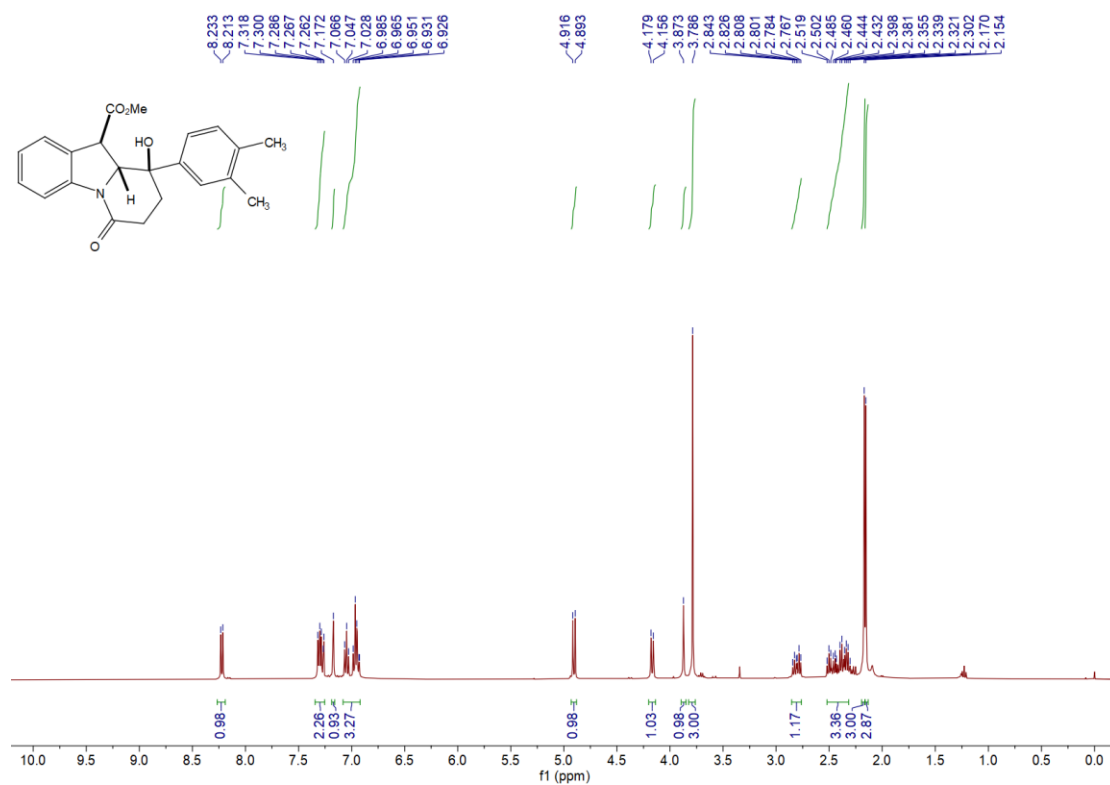

### <sup>13</sup>C NMR Spectrum of **3m**

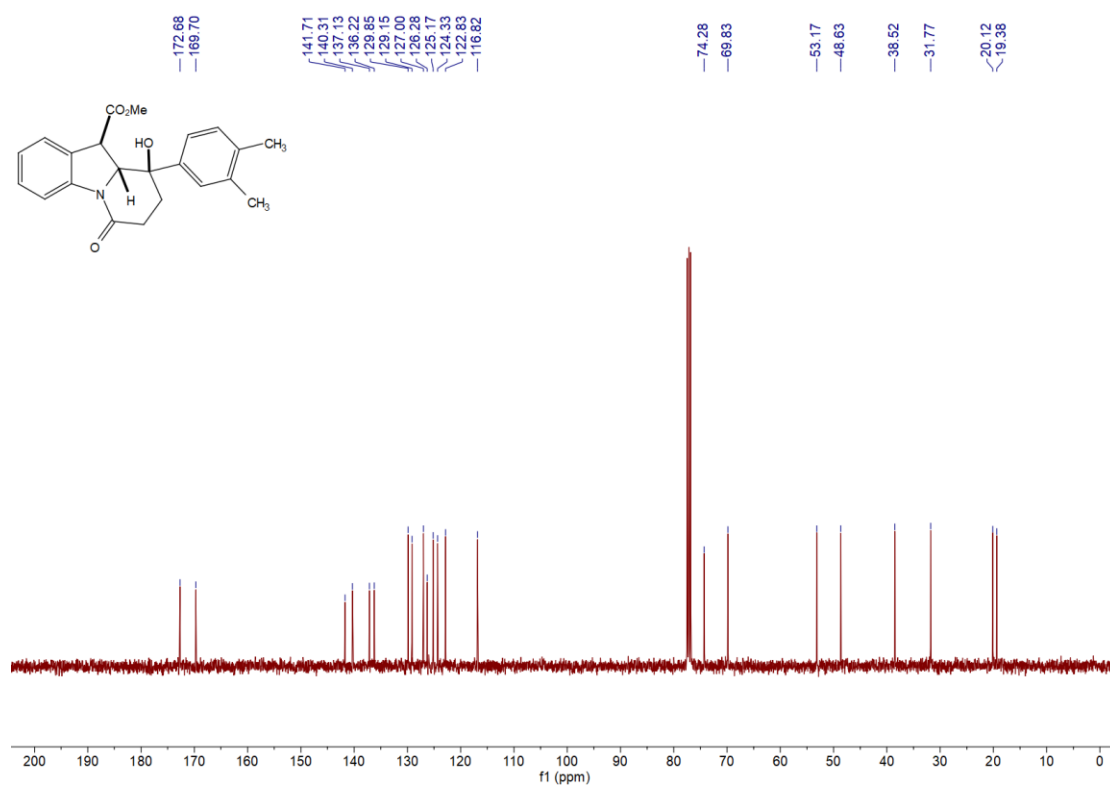



### <sup>1</sup>H NMR Spectrum of **3n**

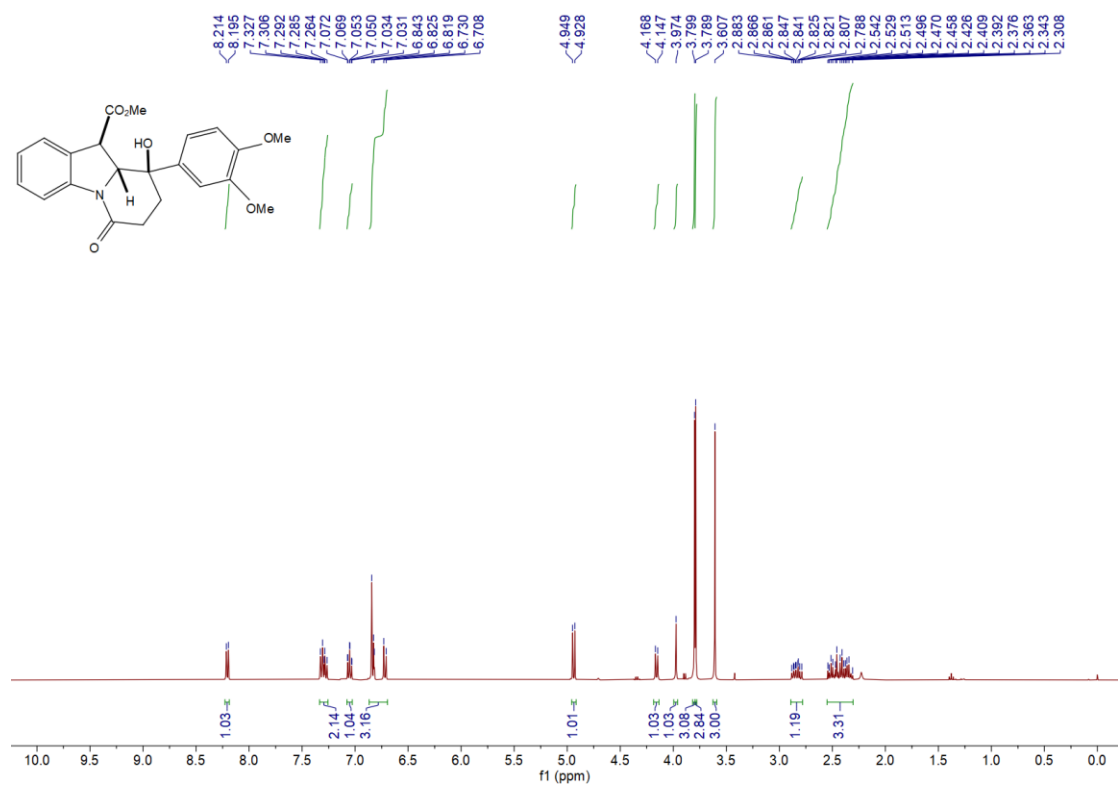

### <sup>13</sup>C NMR Spectrum of **3n**

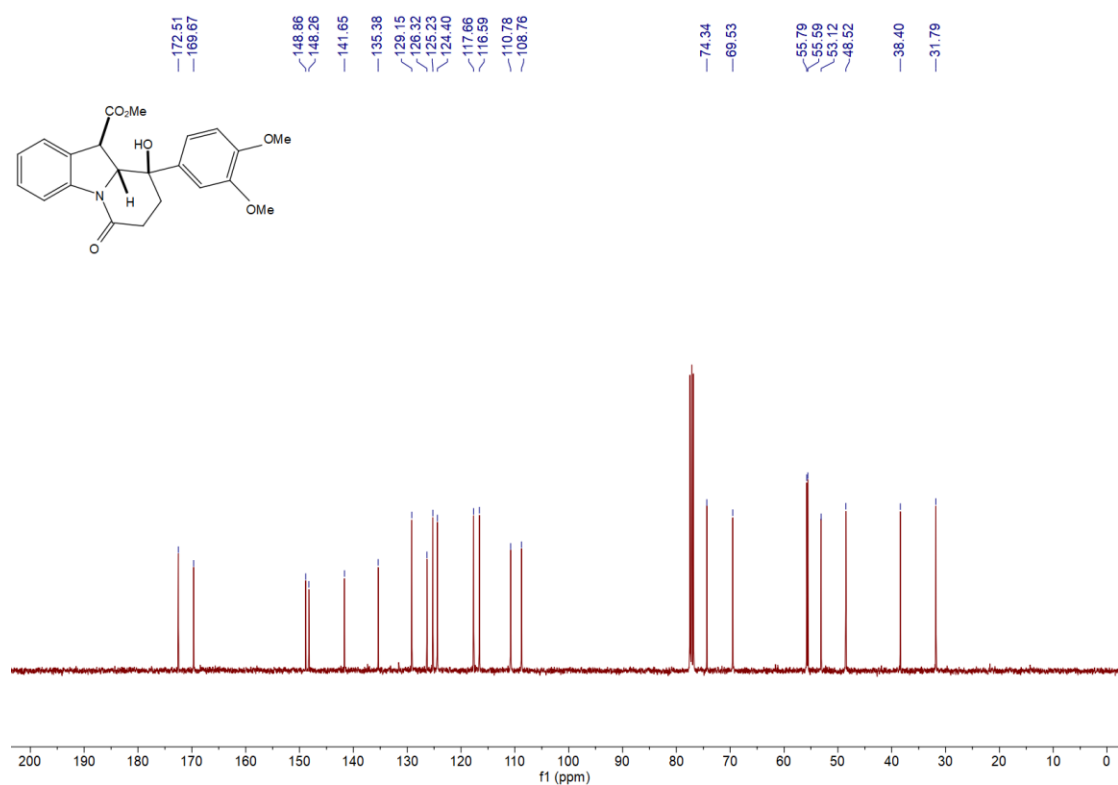

# <sup>1</sup>H NMR Spectrum of **30**

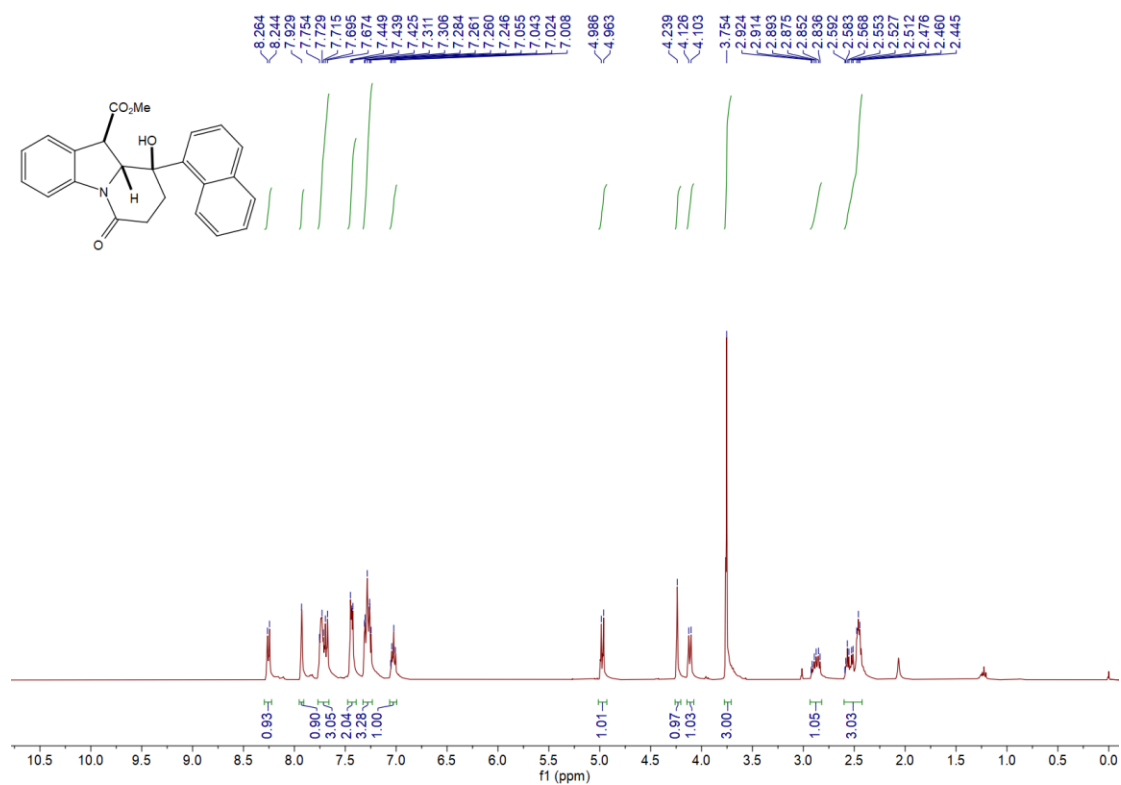

# <sup>13</sup>C NMR Spectrum of **30**

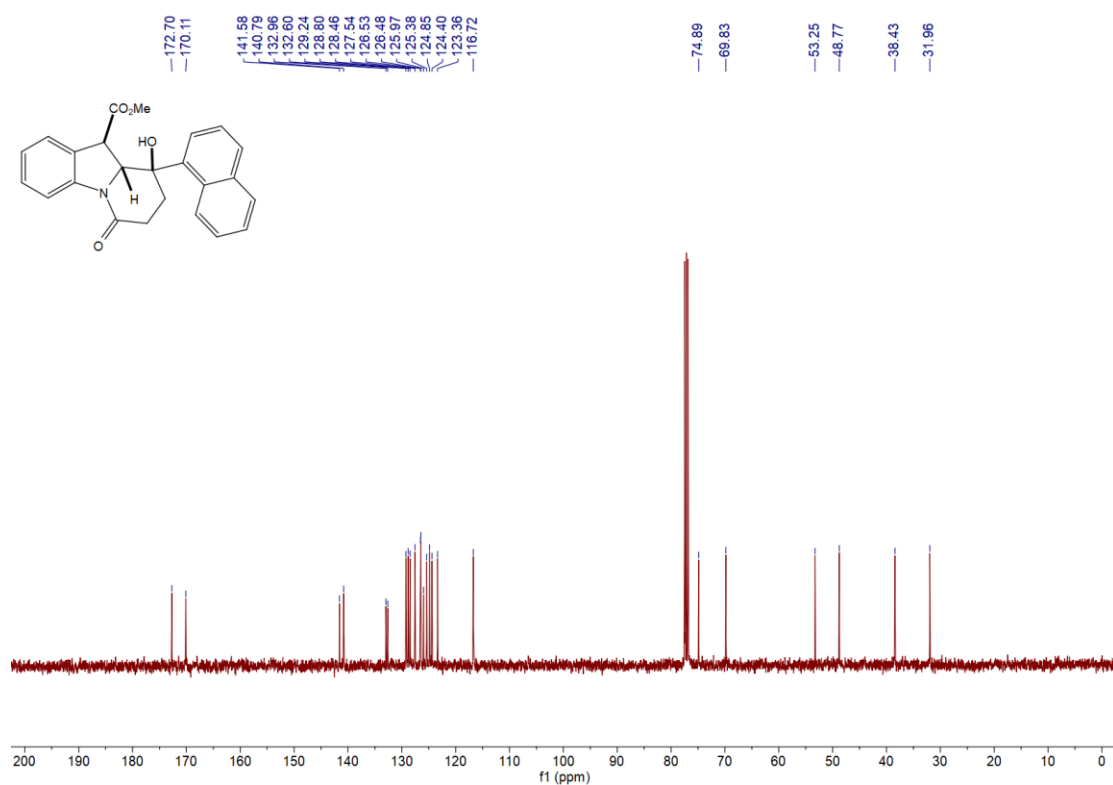

# <sup>1</sup>H NMR Spectrum of 3p

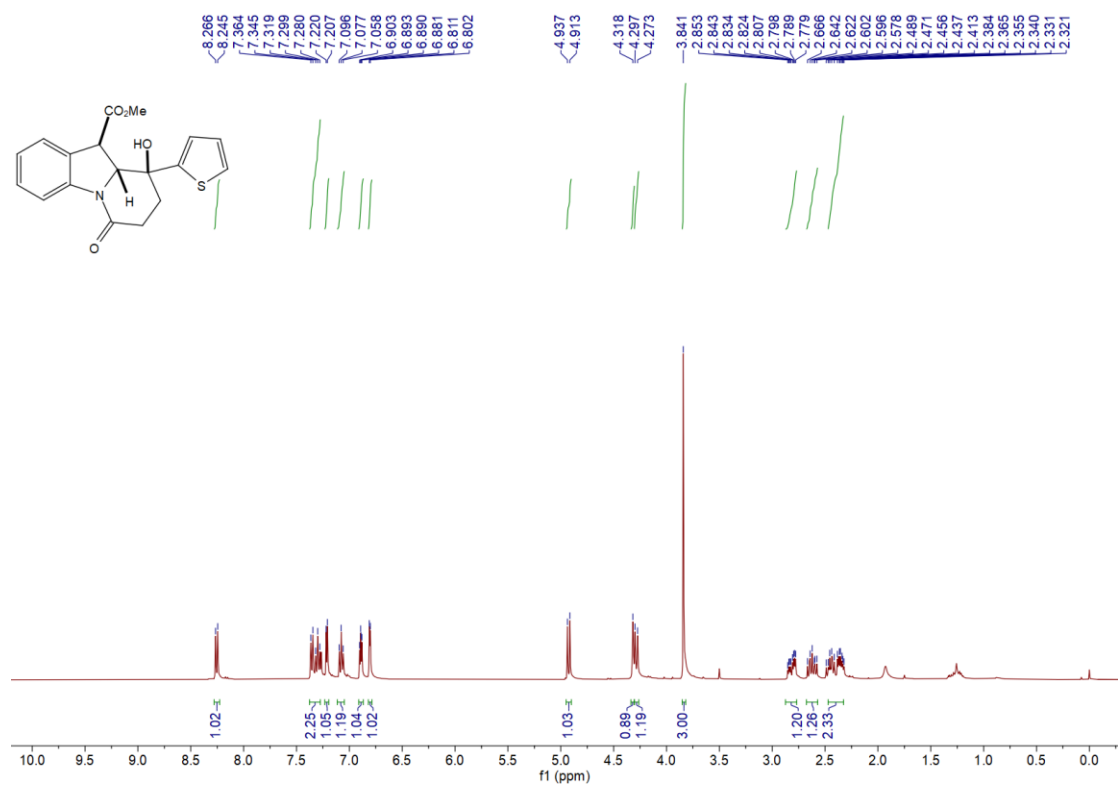

# <sup>13</sup>C NMR Spectrum of 3p

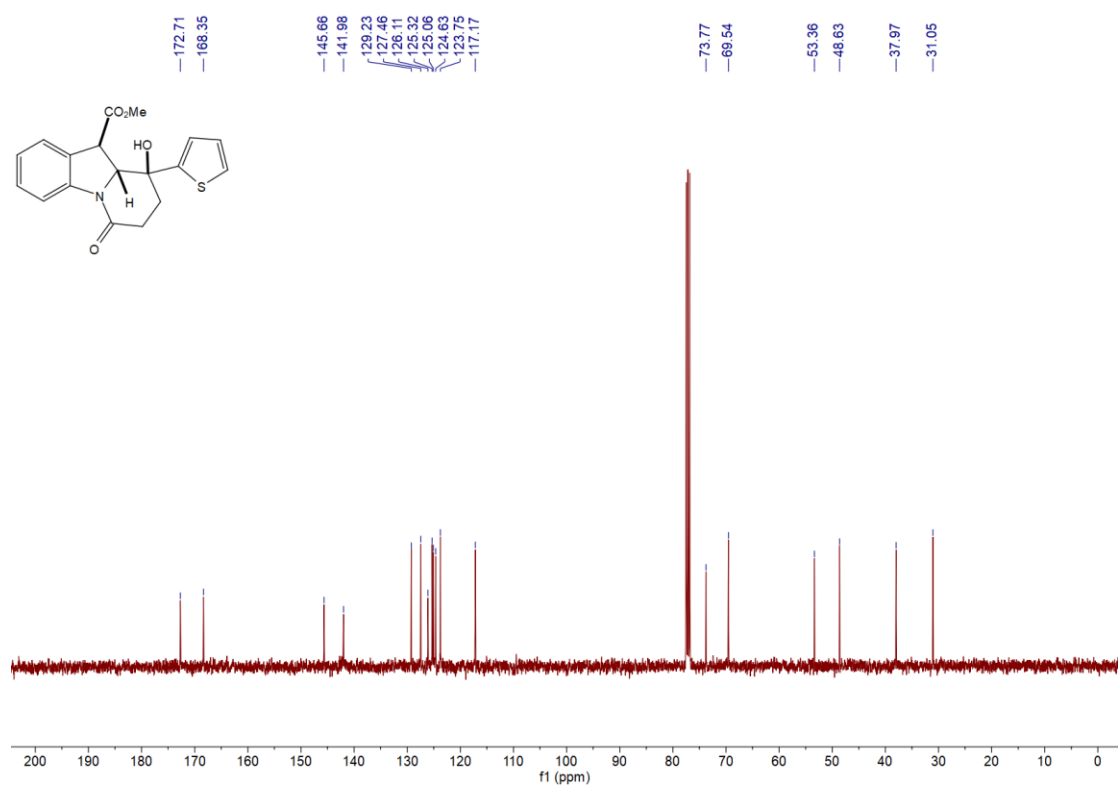

### <sup>1</sup>H NMR Spectrum of **3q**

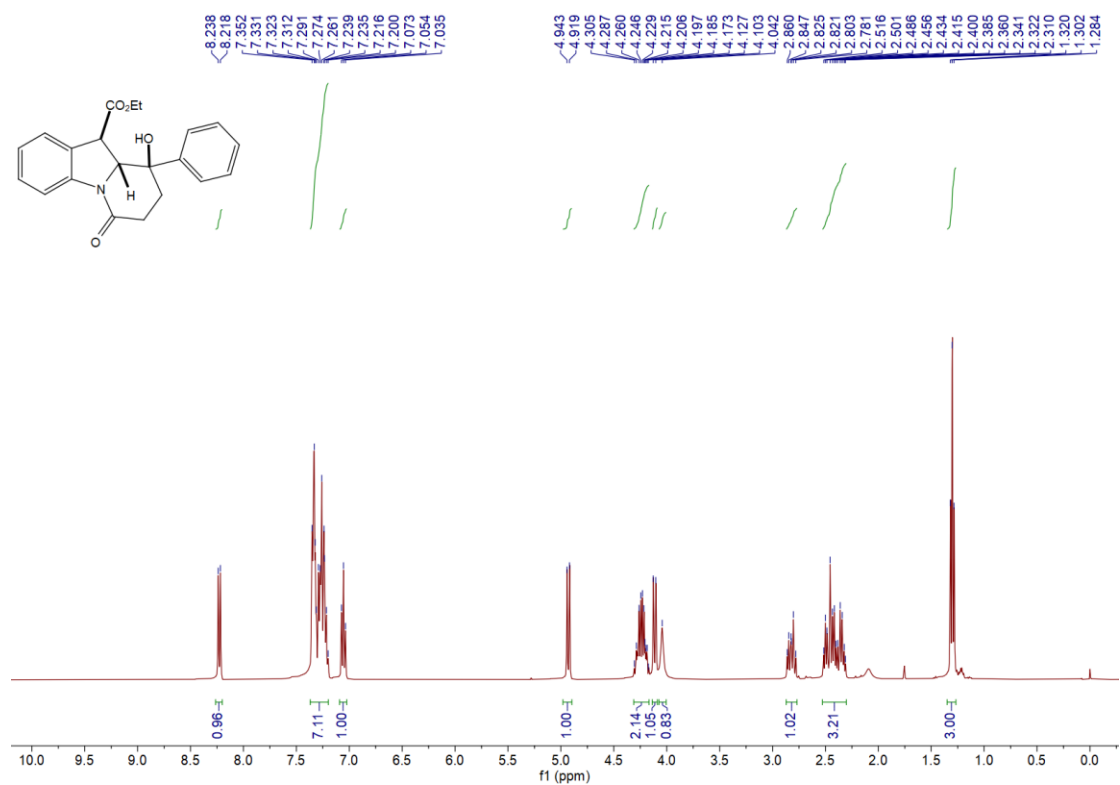

### <sup>13</sup>C NMR Spectrum of **3q**

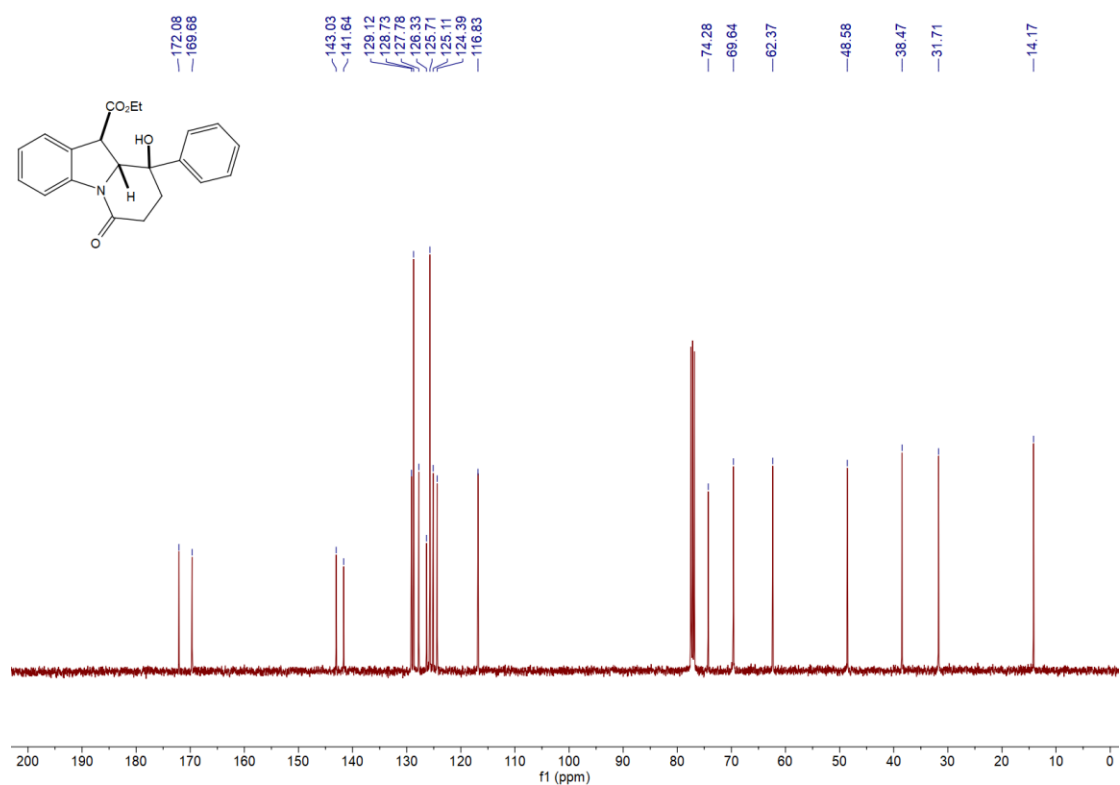

### <sup>1</sup>H NMR Spectrum of **3r**

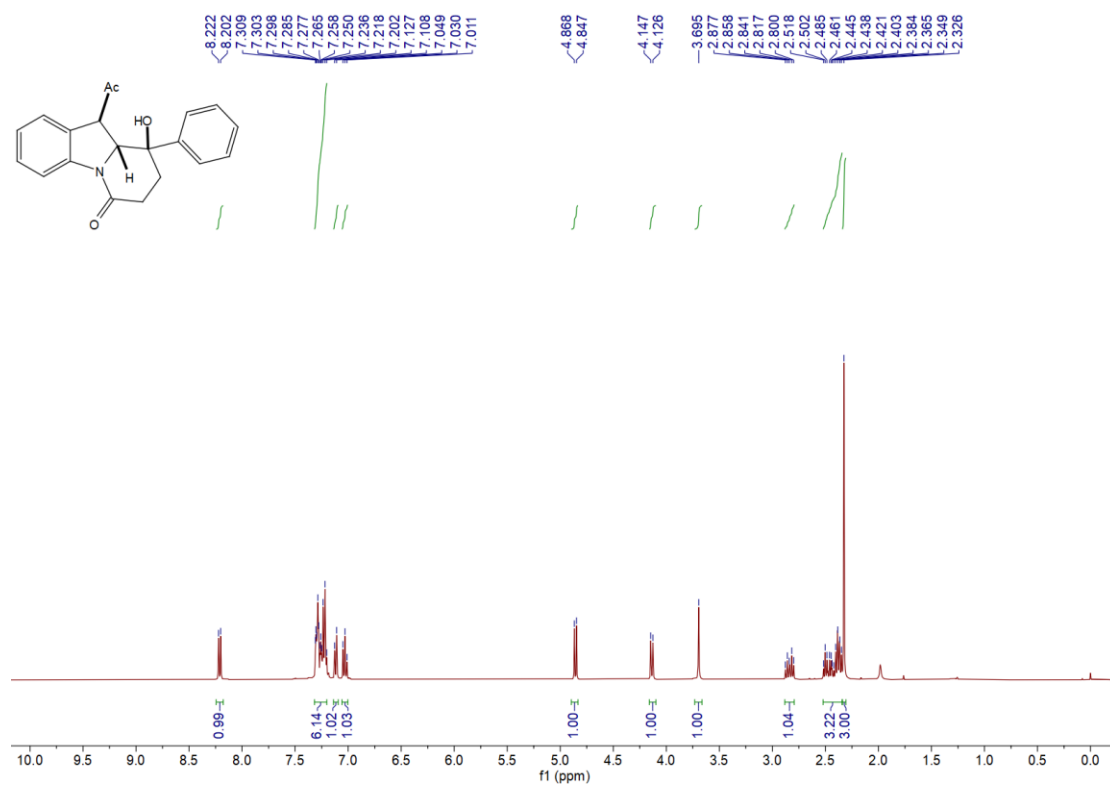

### <sup>13</sup>C NMR Spectrum of **3r**

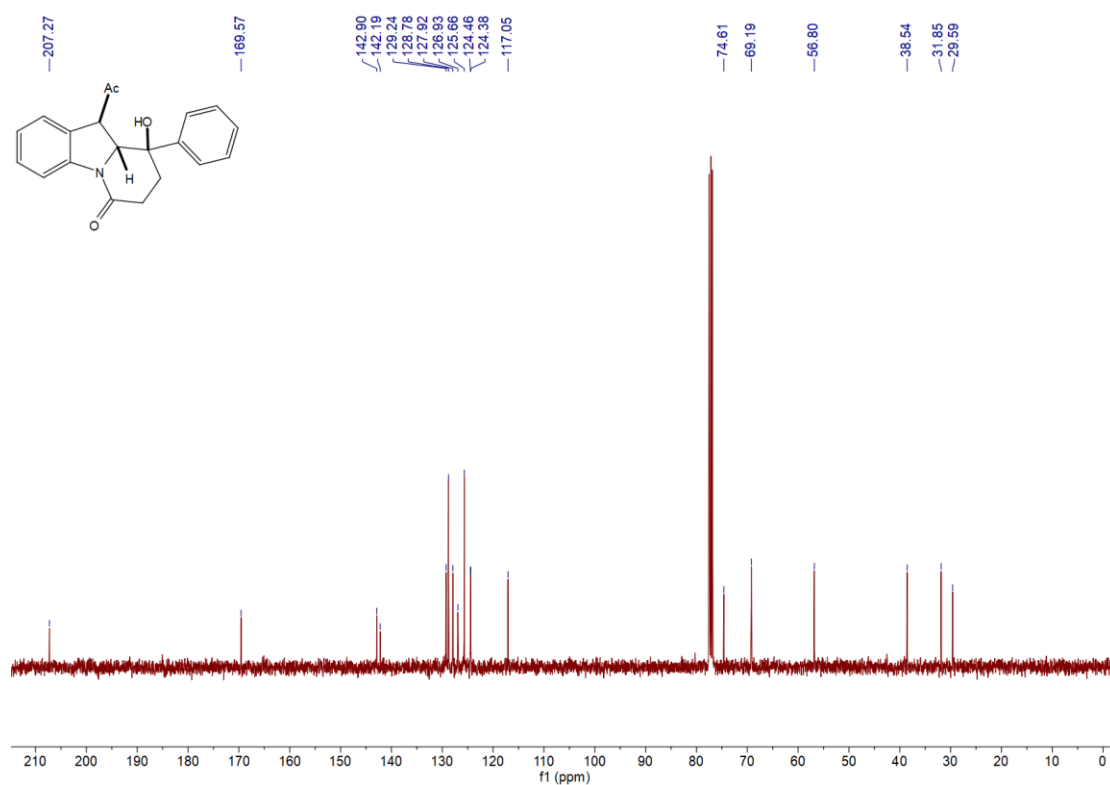

### <sup>1</sup>H NMR Spectrum of **3s**

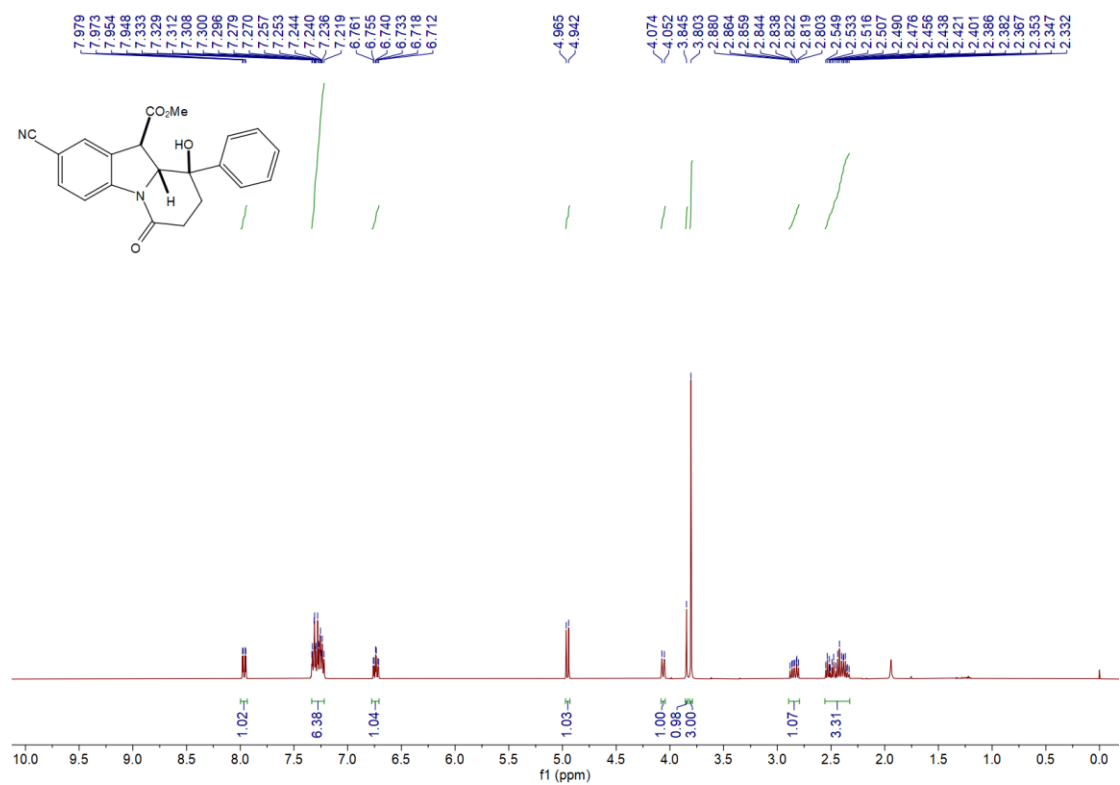

### <sup>13</sup>C NMR Spectrum of **3s**

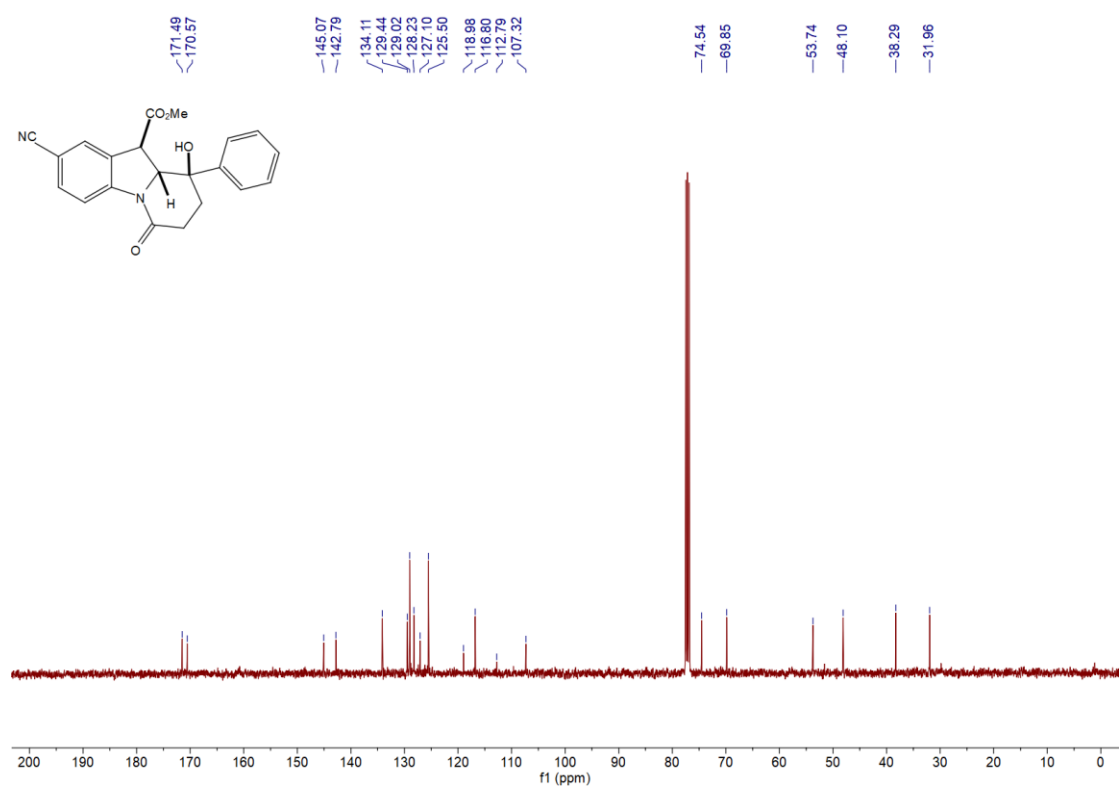

### <sup>1</sup>H NMR Spectrum of **3t**

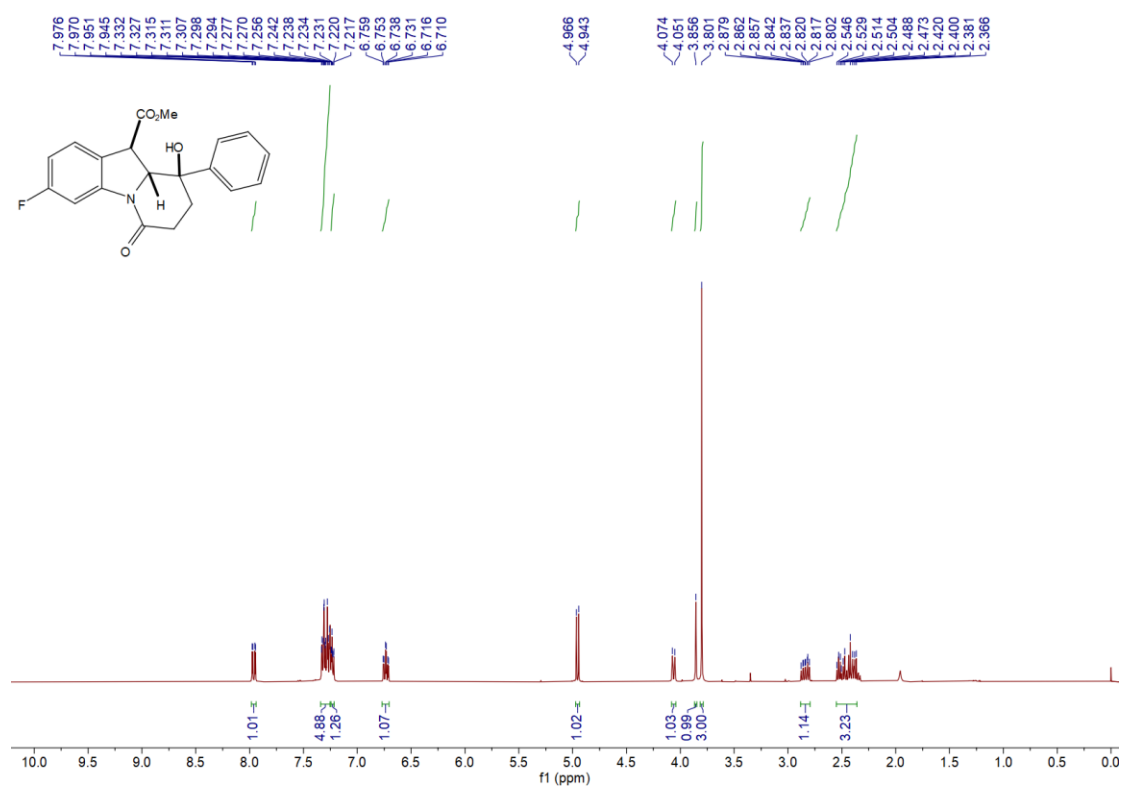

### <sup>13</sup>C NMR Spectrum of **3t**

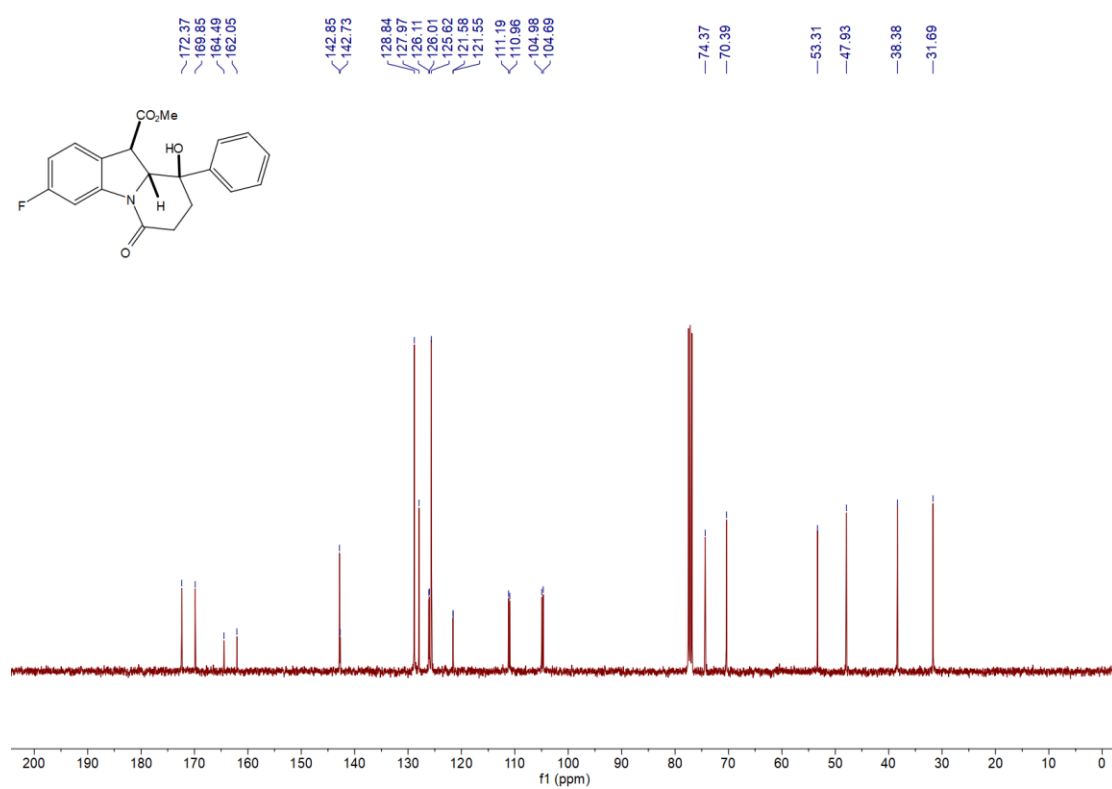

# $^{19}\text{F}$ NMR Spectrum of **3t**

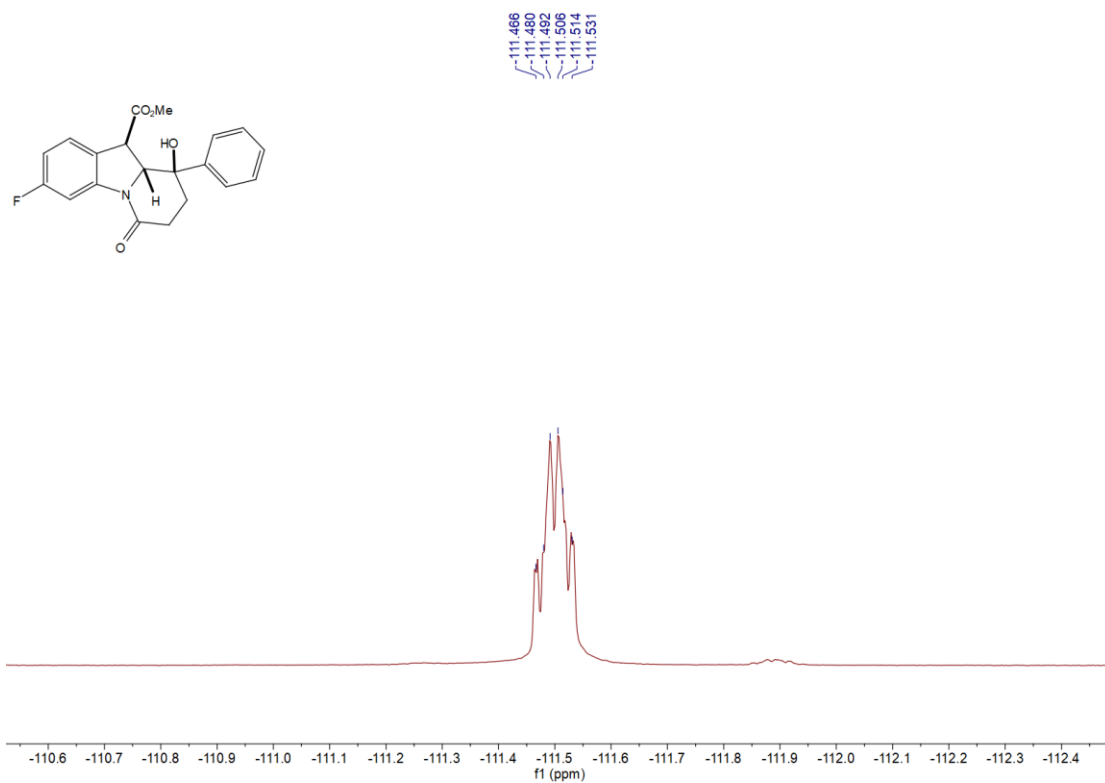

# $^1\text{H}$ NMR Spectrum of **3u**

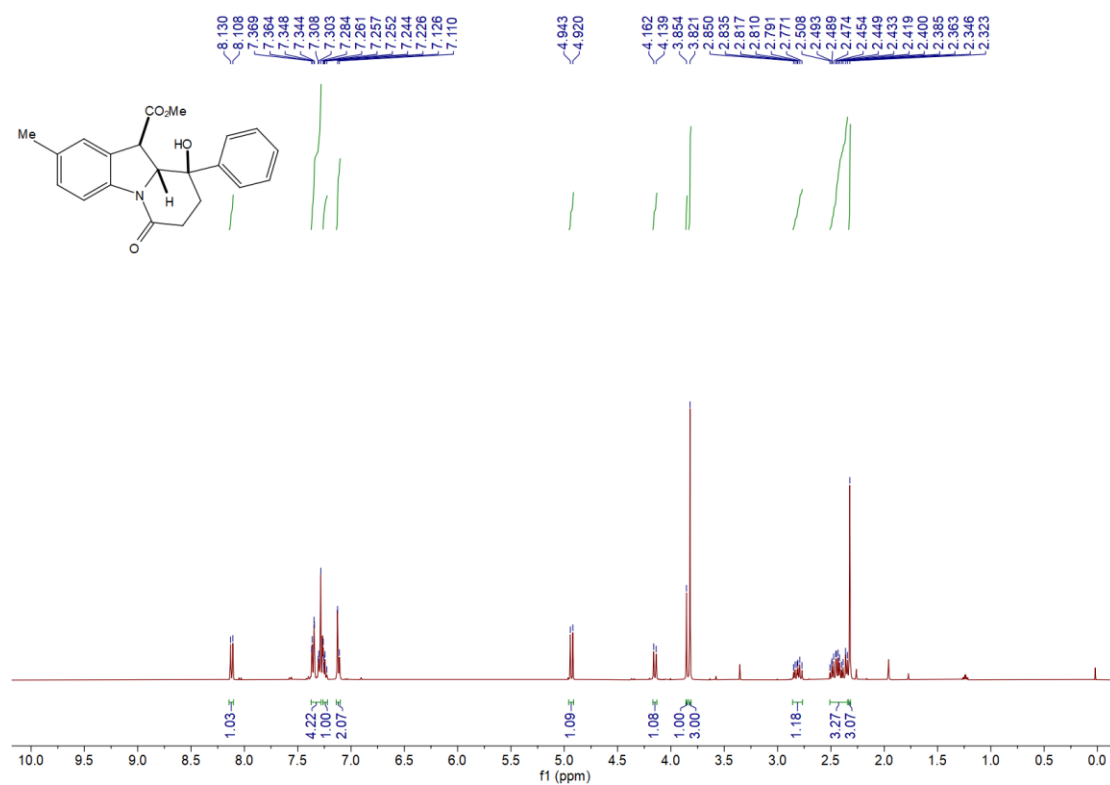



# <sup>13</sup>C NMR Spectrum of **3u**

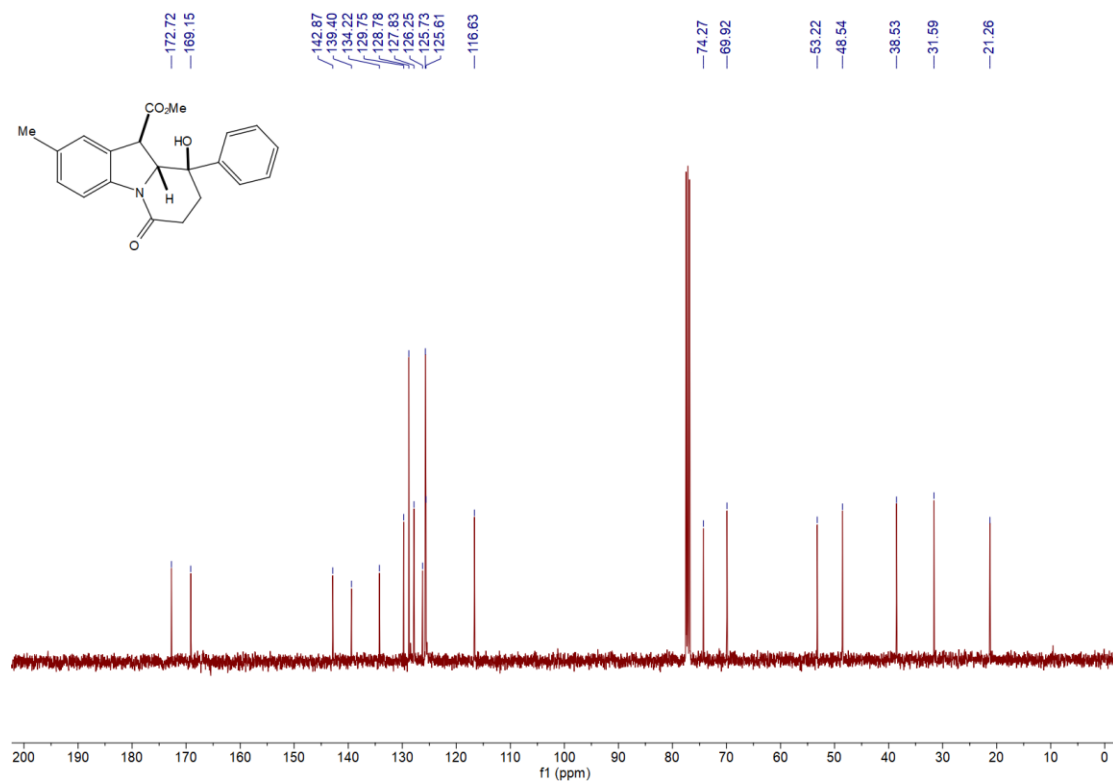

Supplement: d4sc00120f1.pdf [file d4sc00120f1.pdf]
